# Supplementary material for: 5-exo-Selective asymmetric bromolactonization of stilbenecarboxylic acids catalyzed by phenol-bearing chiral thiourea
Source: Royal Society of Chemistry journal article supplement (doi:10.1039/d3ob01895d), 2023-12-09
Supplement: d3ob01895d1.pdf [file d3ob01895d1.pdf]

# 5-*exo*-Selective Asymmetric Bromolactonization of Stilbenecarboxylic Acids Catalyzed by Phenol-bearing Chiral Thiourea

Masayuki Sugano,<sup>†</sup> Tsubasa Inokuma,<sup>†,‡</sup> Yousuke Yamaoka,<sup>§</sup> and Ken-ichi Yamada<sup>\*,†,‡</sup>

<sup>†</sup>Graduate School of Pharmaceutical Sciences, Tokushima University, Shomachi, Tokushima 770-8505,

Japan. <sup>‡</sup>Research Cluster on “Key Material Development”, Tokushima University, Shomachi, Tokushima

770-8505, Japan. <sup>§</sup>Graduate School of Pharmaceutical Sciences, Kyoto University, Yoshida, Sakyo-ku,

Kyoto 606-8501, Japan.

yamak@tokushima-u.ac.jp

## Contents

|                                                  |     |
|--------------------------------------------------|-----|
| 1. General procedure .....                       | S2  |
| 2. Solvent Effect.....                           | S3  |
| 3. Catalyst Synthesis .....                      | S4  |
| 4. Preparation of Stilbenecarboxylic Acids ..... | S17 |
| 5. Enantioselective Bromolactonization of 1..... | S23 |
| 6. X-ray diffraction .....                       | S34 |
| 7. DFT calculation .....                         | S36 |

## Supporting Information I

### **1. General procedure**

All non-aqueous reactions were carried out under a positive atmosphere of argon in dried glassware. Reactions were monitored by thin-layer chromatography (TLC) using Merck TLC silica gel 60 F<sub>254</sub>. Column chromatography was performed using Silica Gel 60N (particle size 0.040–0.050 mm) purchased from Kanto Chemical Co., Inc. Nuclear magnetic resonance (NMR) spectra were recorded on a Bruker AV-400N instrument. The chemical shifts ( $\delta$ ) are reported in parts per million relative to tetramethylsilane (0 ppm) for <sup>1</sup>H and CDCl<sub>3</sub> (77.0 ppm), DMSO-d<sub>6</sub> (39.5 ppm), or acetone-d<sub>6</sub> (206.7 and 30.4 ppm) for <sup>13</sup>C. The coupling constants (*J*) are presented in hertz. The following abbreviations were used to explain NMR peak multiplicities: s = singlet, d = doublet, t = triplet, q = quartet, m = multiplet, br = broad. Mass spectra were recorded on a SHIMADZU LCMS-IT-TOF fitted with an ESI. IR spectroscopy was recorded using an attenuated total reflectance FTIR, and the wavenumbers of maximum absorption peaks are reported in cm<sup>-1</sup>. Optical rotations were measured using a JASCO P-2200 polarimeter (concentration in g dL<sup>-1</sup>). High performance liquid chromatography (HPLC) analyses were performed on a SHIMADZU analytical system equipped with two LC-20AT pumps. Melting point was determined on J-SCIENCE RFS-10.

# Supporting Information I

## 2. Solvent Effect on the Reaction

Table S1. Optimization of reaction solvents<sup>a</sup>

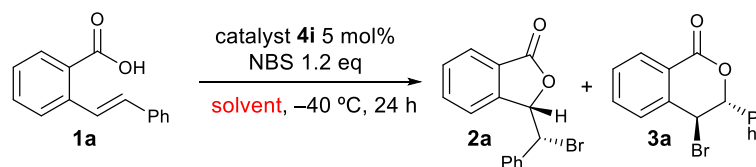

| entry | solvent                                        | yield <sup>b</sup> | <b>2a:3a</b> <sup>c</sup> | er of <b>2a</b> <sup>d</sup> |
|-------|------------------------------------------------|--------------------|---------------------------|------------------------------|
| 1     | CH <sub>2</sub> Cl <sub>2</sub>                | 79%                | 2:1                       | 92:8                         |
| 2     | toluene                                        | trace              | -                         | -                            |
| 3     | CH <sub>2</sub> Cl <sub>2</sub> /toluene (1:1) | 41%                | 3:2                       | 76:24                        |
| 4     | PhCl                                           | 64%                | 5:1                       | 71:29                        |
| 5     | CHCl <sub>3</sub>                              | 67%                | 1:8                       | 83:17                        |

<sup>a</sup> Reaction was conducted using **1a** (0.1 mmol), NBS (0.12 mmol), and **4i** (5 μmol) in solvent (2 mL). Remaining bromine species were quenched by aq Na<sub>2</sub>S<sub>2</sub>O<sub>3</sub> after 24 h. Hyphens in the table denote "not determined." <sup>b</sup> Combined yield of **2a** and **3a**. <sup>c</sup> Determined by <sup>1</sup>H NMR. <sup>d</sup> Determined by chiral HPLC analysis. The enantiomer ratio of **3a** was generally low (50:50–55:45).

## Supporting Information I

### 3. Catalyst Synthesis

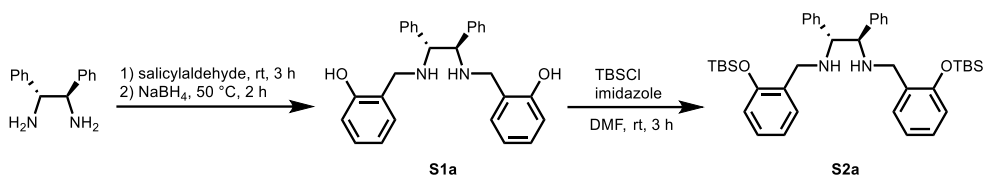

**Typical Procedure for Synthesis of N-Alkylated Diamine. (1*R*,2*R*)-*N,N'*-Bis(2-(*tert*-butyldimethylsiloxy)benzyl)-1,2-diphenylethane-1,2-diamine (S2a):** Salicylaldehyde (610 mg, 5.00 mmol) and (*R,R*)-diphenyl-1,2-ethanediamine (530 mg, 2.50 mmol) were stirred in ethanol (15 mL) for 3 h at rt. To the mixture was added NaBH<sub>4</sub> (1.00 g, 25.8 mmol) in one portion at 0 °C, and then the solution was stirred at 50 °C for 2 h. The solvent was removed by evaporation, and to the residue was added H<sub>2</sub>O (20 mL). The whole was extracted with EtOAc (20 mL × 3), and the combined organic layers were washed with brine, dried with Na<sub>2</sub>SO<sub>4</sub>, and concentrated under reduced pressure to give 2,2'-((3*R*,4*R*)-2,5-Diaza-3,4-diphenylhexamethylene)diphenol (S1a) (1.00 g) as a colorless oil, which was used in the next reaction without further purification. A mixture of diamine S1a (1.00 g, 2.36 mmol), imidazole (802 mg, 11.8 mmol) and TBSCl (885 mg, 5.90 mmol) in DMF (30 mL) was stirred for 3 h at rt. The mixture was poured into water (100 mL), and the whole was extracted with EtOAc (30 mL × 3). The combined organic layers were washed with brine, dried over Na<sub>2</sub>SO<sub>4</sub>, and concentrated under reduced pressure. The residue was purified by column chromatography (hexane/EtOAc 15:1) to give the title compound (1.46 g, 82 %) as colorless oil:  $[\alpha]_D^{29} +19.9$  (*c* 1.54, CHCl<sub>3</sub>). <sup>1</sup>H NMR (CDCl<sub>3</sub>, 400 MHz): 7.20 (d, *J* = 7.5, 2H), 7.10–7.05 (m, 8H), 7.02–7.00 (m, 4H), 6.87 (t, *J* = 7.5, 2H), 6.71 (d, *J* = 7.5, 2H), 3.63 (s, 2H), 3.58 (d, *J* = 12.0, 2H), 3.89 (d, *J* = 12.0, 2H), 0.79 (s, 18 H), 0.10 (s, 6H), 0.08 (s, 6H). <sup>13</sup>C NMR (CDCl<sub>3</sub>, 100 MHz): 153.6 (C), 141.5 (C), 131.1 (C), 129.7 (CH), 128.1 (CH), 127.9 (CH), 127.4 (CH), 126.7 (CH), 121.0 (CH), 118.5 (CH), 68.5 (CH), 46.4 (CH<sub>2</sub>), 25.8 (CH<sub>3</sub>), 18.2 (C), –4.2 (CH<sub>3</sub>). MS (ESI) *m/z*: 653 (M + H). HRMS (ESI) *m/z*: [M + H]<sup>+</sup> calcd for C<sub>40</sub>H<sub>57</sub>N<sub>2</sub>O<sub>2</sub>Si<sub>2</sub>, 653.3959; found, 653.3969. IR (NaCl): 3340, 3060, 2936, 1594, 1490, 1267, 1104, 917, 835, 786.

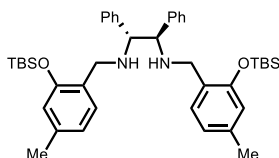

**(1*R*,2*R*)-*N,N'*-Bis(2-(*tert*-butyldimethylsiloxy)-4-methylbenzyl)-1,2-diphenylethane-1,2-diamine (S2f):** The typical procedure using 2-hydroxy-4-methylbenzaldehyde (210 mg, 1.54 mmol), NaBH<sub>4</sub> (260 mg, 7.70 mmol), EtOH (5 mL), imidazole (270 mg, 3.97 mmol), TBSCl (360 mg, 2.40 mmol), and DMF (5 mL) gave the title compound (340 mg, 65%) as colorless oil:  $[\alpha]_D^{31} -8.23$  (*c* 1.36, CHCl<sub>3</sub>). <sup>1</sup>H NMR (CDCl<sub>3</sub>, 400 MHz): 7.09–7.07 (m, 10H), 7.00 (m, 4H), 6.64 (d, *J* = 8.0, 2H), 3.71 (s, 2H), 3.63 (d, *J* = 13.0, 2H), 3.43 (d, *J* = 13.0, 2H), 2.27 (s, 6H), 0.88 (s, 18H), 0.11 (s, 6H), 0.09 (s, 6H). <sup>13</sup>C NMR (CDCl<sub>3</sub>, 100 MHz): 153.4 (C), 141.5 (C), 137.2 (C), 129.4 (CH), 127.4 (C), 128.2 (CH), 127.8 (CH), 127.0 (CH), 121.6 (CH), 119.3 (CH), 68.4 (CH), 46.0 (CH<sub>2</sub>), 25.8 (CH<sub>3</sub>), 21.2 (CH<sub>3</sub>), 18.2 (C), –4.2 (CH<sub>3</sub>). MS (ESI) *m/z*: 681 (M + H). HRMS (ESI) *m/z*: [M + H]<sup>+</sup> calcd for C<sub>42</sub>H<sub>61</sub>N<sub>2</sub>O<sub>2</sub>Si<sub>2</sub>, 681.4272; found, 681.4274. IR (NaCl): 3270, 2950, 2920, 1620, 1450, 1300, 1120, 850, 850, 770.

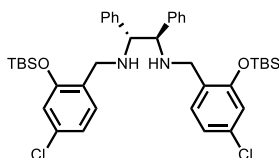

## Supporting Information I

**(1*R*,2*R*)-*N,N'*-Bis(2-(*tert*-butyldimethylsiloxy)-4-chlorobenzyl)-1,2-diphenylethane-1,2-diamine (S2g):** The typical procedure using 2-hydroxy-4-chlorobenzaldehyde (690 mg, 4.45 mmol), NaBH<sub>4</sub> (490 mg, 12.8 mmol), imidazole (480 mg, 7.06 mmol), TBSCl (550 mg, 3.67 mmol) and column chromatography (hexane/EtOAc 30:1) gave the title compound (750 mg, 70%) as colorless oil: [ $\alpha$ ]<sub>D</sub><sup>23</sup> -25.0 (*c* 1.01, CHCl<sub>3</sub>). **<sup>1</sup>H NMR** (CDCl<sub>3</sub>, 400 MHz): 7.13–7.01 (m, 8H), 7.02–7.00 (m, 4H), 6.86 (dd, *J* = 8.0, 2.0, 2H), 6.71 (d, *J* = 2.0, 2H), 3.66 (s, 2H), 3.61 (d, *J* = 14.0, 2H), 3.42 (d, *J* = 14.0, 2H), 0.87 (s, 18H), 0.12 (s, 6H), 0.09 (s, 6H). **<sup>13</sup>C NMR** (CDCl<sub>3</sub>, 100 MHz): 154.1 (C), 141.1 (C), 132.3 (C), 130.4 (CH), 129.7 (C), 127.9 (CH), 127.9 (CH), 126.8 (CH), 121.0 (CH), 118.8 (CH), 68.2 (CH), 45.9 (CH<sub>2</sub>), 25.6 (CH<sub>3</sub>), 18.1 (C), -4.2 (CH<sub>3</sub>). **MS** (ESI) *m/z*: 721 (M + H), 723 (M + 2 + H), 725 (M + 4 + H). **HRMS** (ESI) *m/z*: [M + H]<sup>+</sup> calcd for C<sub>40</sub>H<sub>55</sub>N<sub>2</sub>O<sub>2</sub>Si<sub>2</sub>Cl<sub>2</sub>, 721.3179; found, 721.3151. **IR** (NaCl): 3200, 2950, 2850, 1600, 1470, 1400, 1240, 940, 850, 780.

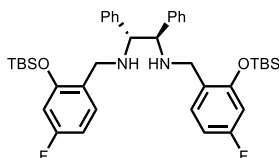

**(1*R*,2*R*)-*N,N'*-Bis(2-(*tert*-butyldimethylsiloxy)-4-fluorobenzyl)-1,2-diphenylethane-1,2-diamine (S2h):** The typical procedure using 2-hydroxy-4-fluorobenzaldehyde (730 mg, 5.21 mmol), NaBH<sub>4</sub> (590 mg, 7.70 mmol), EtOH (10 mL), imidazole (570 mg, 8.38 mmol), TBSCl (550 mg, 3.67 mmol) and column chromatography (hexane/EtOAc 20:1) gave the title compound (820 mg, 73%) as colorless oil: [ $\alpha$ ]<sub>D</sub><sup>22</sup> -20.3 (*c* 1.59, CHCl<sub>3</sub>). **<sup>1</sup>H NMR** (CDCl<sub>3</sub>, 400 MHz): 7.14–7.07 (m, 8H), 7.01–7.00 (m, 4H), 6.58 (td, *J* = 8.5, 2.5, 2H), 6.64 (dd, *J* = 10.5, 2.5, 2H), 3.66 (s, 2H), 3.59 (d, *J* = 14.0, 2H), 3.41 (d, *J* = 14.0, 2H), 0.87 (s, 18H), 0.12 (s, 6H), 0.09 (s, 6H). **<sup>13</sup>C NMR** (CDCl<sub>3</sub>, 100 MHz): 162.0 (d, *J* = 243, C), 154.5 (d, *J* = 11, C), 141.3 (C), 130.4 (CH), 130.3 (CH), 128.0 (d, *J* = 7, CH), 126.9 (d, *J* = 4, C), 126.7 (CH), 107.4 (d, *J* = 21, CH), 105.9 (d, *J* = 21, CH), 68.3 (CH), 46.0 (CH<sub>2</sub>), 25.7 (CH<sub>3</sub>), 18.1 (C), -4.3 (CH<sub>3</sub>). **MS** (ESI) *m/z*: 689 (M + H). **HRMS** (ESI) *m/z*: [M + H]<sup>+</sup> calcd for C<sub>40</sub>H<sub>55</sub>N<sub>2</sub>O<sub>2</sub>F<sub>2</sub>Si<sub>2</sub>, 689.3770; found, 689.3783. **IR** (NaCl): 3300, 2950, 2880, 1620, 1470, 1460, 1270, 1150, 980, 850.

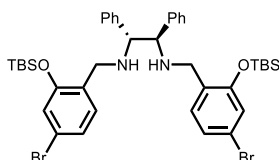

**(1*R*,2*R*)-*N,N'*-Bis(2-(*tert*-butyldimethylsiloxy)-4-bromobenzyl)-1,2-diphenylethane-1,2-diamine (S2i):** The typical procedure using 2-hydroxy-4-bromobenzaldehyde (660 mg, 3.30 mmol), NaBH<sub>4</sub> (200 mg, 5.26 mmol), EtOH (20 mL), imidazole (530 mg, 7.70 mmol), TBSCl (700 mg, 4.62 mmol), DMF (10 mL), and column chromatography (hexane/EtOAc 20:1) gave the title compound (810 mg, 65%) as colorless oil: [ $\alpha$ ]<sub>D</sub><sup>23</sup> -26.9 (*c* 1.04, CHCl<sub>3</sub>). **<sup>1</sup>H NMR** (CDCl<sub>3</sub>, 400 MHz): 7.12–7.09 (m, 6H), 7.01–6.99 (m, 8H), 6.85 (d, *J* = 2.0, 2H), 3.64 (s, 2H), 3.59 (d, *J* = 14.0, 2H), 3.39 (d, *J* = 14.0, 2H), 0.85 (s, 18H), 0.11 (s, 6H), 0.09 (s, 6H). **<sup>13</sup>C NMR** (CDCl<sub>3</sub>, 100 MHz): 154.3 (C), 141.1 (C), 130.8 (CH), 130.2 (C), 130.0 (CH), 126.80 (CH), 126.78 (CH), 124.0 (CH), 121.7 (CH), 120.1 (C), 68.3 (CH), 45.8 (CH<sub>2</sub>), 25.6 (CH<sub>3</sub>), 18.1 (C), -4.2 (CH<sub>3</sub>). **MS** (ESI) *m/z*: 809 (M + H), 811 (M + 2 + H), 813 (M + 4 + H). **HRMS** (ESI) *m/z*: [M + H]<sup>+</sup> calcd for C<sub>40</sub>H<sub>55</sub>N<sub>2</sub>O<sub>2</sub>Si<sub>2</sub>Br<sub>2</sub>, 809.2169; found, 809.2200. **IR** (NaCl): 2940, 2850, 1600, 1460, 1390, 1260, 960, 850, 760, 690.

## Supporting Information I

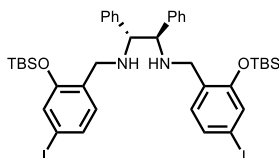

**(1*R*,2*R*)-*N,N'*-Bis(2-(*tert*-butyldimethylsiloxy)-4-iodobenzyl)-1,2-diphenylethane-1,2-diamine (S2j):** The typical procedure using 2-hydroxy-4-iodobenzaldehyde (980 mg, 3.96 mmol), NaBH<sub>4</sub> (230 mg, 6.04 mmol), and EtOH (20 mL) gave **S1f** (940 mg, 70%) as colorless solid. The typical procedure using a part of **S1f** (500 mg, 0.739 mmol), TBSCl (332 mg, 2.20 mmol), imidazole (250 mg, 3.68 mmol), DMF (10 mL), and column chromatography (hexane/EtOAc 20:1) gave the title compound (590 mg, 88%) as colorless oil:  $[\alpha]_{\text{D}}^{23} -18.4$  (*c* 1.04, CHCl<sub>3</sub>). **<sup>1</sup>H NMR** (CDCl<sub>3</sub>, 400 MHz): 7.20 (dd, *J* = 8.0, 2.0, 2H), 7.13–7.09 (m, 6H), 7.04 (d, *J* = 2.0, 2H), 7.00 (m, 4H), 6.88 (d, *J* = 8.0, 2H), 3.64 (s, 2H), 3.58 (d, *J* = 14.0, 2H), 3.39 (d, *J* = 14.0, 2H), 0.86 (s, 18H), 0.10 (s, 6H), 0.08 (s, 6H). **<sup>13</sup>C NMR** (CDCl<sub>3</sub>, 100 MHz): 154.3 (C), 141.1 (C), 131.1 (CH), 130.9 (C), 130.1 (CH), 127.9 (CH), 127.50 (CH), 127.47 (CH), 126.8 (CH), 91.4 (C), 68.2 (CH), 45.9 (CH<sub>2</sub>), 25.6 (CH<sub>3</sub>), 18.1 (C), –4.2 (CH<sub>3</sub>). **MS** (ESI) *m/z*: 905 (M + H). **HRMS** (ESI) *m/z*: [M + H]<sup>+</sup> calcd for C<sub>40</sub>H<sub>55</sub>N<sub>2</sub>O<sub>2</sub>Si<sub>2</sub>I<sub>2</sub>, 905.1892; found, 905.1857. **IR** (NaCl): 3200, 2950, 2880, 1560, 1490, 1380, 1220, 1125, 910, 810.

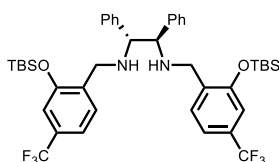

**(1*R*,2*R*)-*N,N'*-Bis(2-(*tert*-butyldimethylsiloxy)-4-(trifluoromethyl)benzyl)-1,2-diphenylethane-1,2-diamine (S2k):** The typical procedure using 2-hydroxy-4-(trifluoromethyl)benzaldehyde (1.25 g, 6.57 mmol), NaBH<sub>4</sub> (740 mg, 19.5 mmol), and EtOH (10 mL) gave **S1g** (1.30 g, 71%) as colorless solid. The typical procedure using a part of **S1g** (400 mg, 0.714 mmol), TBSCl (332 mg, 2.20 mmol), imidazole (242 mg, 3.56 mmol), DMF (10 mL), and column chromatography (hexane/EtOAc 20:1) gave the title compound (590 mg, 88%) as colorless oil:  $[\alpha]_{\text{D}}^{23} -21.7$  (*c* 1.16, CHCl<sub>3</sub>). **<sup>1</sup>H NMR** (CDCl<sub>3</sub>, 400 MHz): 7.25 (d, *J* = 8.0, 2H), 7.16–7.08 (m, 8H), 7.05–7.00 (m, 4H), 6.91 (s, 2H), 3.67 (s, 2H), 3.65 (d, *J* = 14.0, 2H), 3.51 (d, *J* = 14.0, 2H), 0.87 (s, 18H), 0.11 (s, 6H), 0.09 (s, 6H). **<sup>13</sup>C NMR** (CDCl<sub>3</sub>, 100 MHz): 153.6 (C), 140.1 (C), 135.1 (C), 129.9 (CH), 129.8 (q, *J* = 32, C) 128.0 (CH), 127.9 (CH), 127.0 (CH), 124.0 (q, *J* = 270, C), 117.9 (CH), 115.1 (CH), 68.4 (CH), 46.1 (CH<sub>2</sub>), 25.6 (CH<sub>3</sub>), 18.1 (C), –4.3 (CH<sub>3</sub>). **MS** (ESI) *m/z*: 789 (M + H). **HRMS** (ESI) *m/z*: [M + H]<sup>+</sup> calcd for C<sub>42</sub>H<sub>55</sub>N<sub>2</sub>O<sub>2</sub>F<sub>6</sub>Si<sub>2</sub>, 789.3706; found, 789.3688. **IR** (NaCl): 3340, 2960, 2860, 1630, 1600, 1530, 1420, 1330, 1240, 1180.

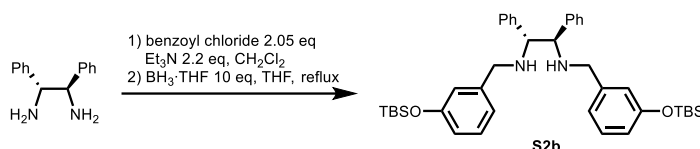

**Typical Procedure for Acylation and Reduction of Diamine. (1*R*,2*R*)-*N,N'*-Bis(3-(*tert*-butyldimethylsiloxy)benzyl)-1,2-diphenylethane-1,2-diamine (S2b):** Under argon atmosphere, to a solution of (*R,R*)-diphenyl-1,2-ethanediamine (165 mg, 0.792 mmol) and Et<sub>3</sub>N (0.30 mL, 2.1 mmol) in CH<sub>2</sub>Cl<sub>2</sub> (8 mL) at 0 °C was added 3-(*tert*-butyldimethylsiloxy)benzoyl chloride (430 mg, 1.59 mmol). The solution was stirred for 1 h at rt. The reaction was quenched with 1 M HCl aq, and the whole mixture was extracted with CH<sub>2</sub>Cl<sub>2</sub> (10 mL × 3). The combined organic layers were washed with 2 M HCl aq and brine, dried over Na<sub>2</sub>SO<sub>4</sub>, and concentrated under reduced pressure. The residue was dissolved in THF. Under argon atmosphere, to the solution was added a 1.0 M THF solution of BH<sub>3</sub>·THF (1.8 mL, 1.8 mmol) at 0 °C. The mixture was

## Supporting Information I

heated under reflux for 10 h. After cooling to 0 °C, MeOH was slowly added, and then the volatile materials were evaporated. The residue was purified by column chromatography (hexane/EtOAc 10:1) to give the title compound (120 mg, 20%) as yellow oil:  $[\alpha]_{\text{D}}^{23} -14.3$  ( $c$  1.05,  $\text{CHCl}_3$ ). **<sup>1</sup>H NMR** ( $\text{CDCl}_3$ , 400 MHz): 7.20–7.12 (m, 8H), 7.04–7.03 (m, 4H), 6.84 (d,  $J = 7.5$ , 2H), 6.74–6.70 (m, 4H), 3.71 (s, 2H), 3.63 (d,  $J = 13.0$ , 2H), 3.44 (d,  $J = 13.0$ , 2H), 2.36 (brs, 2H), 0.99 (s, 18H), 0.20 (s, 12H). **<sup>13</sup>C NMR** ( $\text{CDCl}_3$ , 100 MHz): 155.6 (C), 142.2 (C), 141.1 (C), 129.2 (CH), 128.0 (CH), 127.9 (CH), 126.9 (CH), 121.0 (CH), 119.8 (CH), 118.5 (CH), 68.1 (CH), 51.2 ( $\text{CH}_2$ ), 27.7 ( $\text{CH}_3$ ), 18.2 (C), –4.3 ( $\text{CH}_3$ ). **MS** (ESI)  $m/z$ : 653 (M + H). **HRMS** (ESI)  $m/z$ : [M + H]<sup>+</sup> calcd for  $\text{C}_{40}\text{H}_{57}\text{N}_2\text{O}_2\text{Si}_2$ , 653.3959; found, 653.3931. **IR** (NaCl): 3300, 2960, 2930, 1600, 1490, 1450, 1260, 1200, 850, 780.

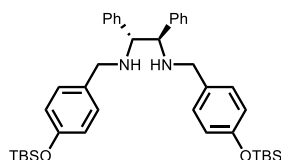

**(1R,2R)-N,N'-Bis(4-(tert-butyldimethylsilyloxy)benzyl)-1,2-diphenylethane-1,2-diamine (S2c)**: The typical procedure using 4-(tert-butyldimethylsilyloxy)benzoyl chloride (570 mg, 2.05 mmol),  $\text{Et}_3\text{N}$  (0.15 mL, 2.1 mmol), and a 1.0 M THF solution of  $\text{BH}_3 \cdot \text{THF}$  (10 mL, 10 mmol) gave the title compound (620 mg, 95 %) as colorless solid of mp 73.0–74.3 °C:  $[\alpha]_{\text{D}}^{30} -19.8$  ( $c$  1.12,  $\text{CHCl}_3$ ). **<sup>1</sup>H NMR** ( $\text{CDCl}_3$ , 400 MHz): 7.20–7.12 (m, 6H), 7.08–7.02 (m, 8H), 6.77–6.75 (m, 4H), 3.69 (s, 2H), 3.59 (d,  $J = 14.0$ , 2H), 3.41 (d,  $J = 14.0$ , 2H), 1.00 (s, 18H), 0.20 (s, 12H). **<sup>13</sup>C NMR** ( $\text{CDCl}_3$ , 100 MHz): 154.4 (C), 141.2 (C), 133.4 (C), 129.2 (CH), 128.0 (CH), 127.9 (CH), 126.8 (CH), 119.8 (CH), 68.3 (CH), 50.8 ( $\text{CH}_2$ ), 25.7 ( $\text{CH}_3$ ), 18.2 (C), –4.4 ( $\text{CH}_3$ ). **MS** (ESI)  $m/z$ : 653 (M + H). **HRMS** (ESI)  $m/z$ : [M + H]<sup>+</sup> calcd for  $\text{C}_{40}\text{H}_{57}\text{N}_2\text{O}_2\text{Si}_2$ , 653.3959; found, 653.3965. **IR** (KBr): 3200, 2950, 2930, 2860, 1500, 1440, 1260, 920, 840, 780.

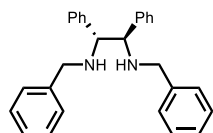

**(1R,2R)-N,N'-Dibenzyl-1,2-diphenylethane-1,2-diamine (S1e)**: The typical procedure using benzoyl chloride (0.56 mL, 4.8 mmol),  $\text{Et}_3\text{N}$  (1.4 mL, 10 mmol), and a 1.0 M THF solution of  $\text{BH}_3 \cdot \text{THF}$  (35 mL, 35 mmol) gave the title compound (510 mg, 65 %) as colorless oil:  $[\alpha]_{\text{D}}^{26} -25.5$  ( $c$  1.38,  $\text{CHCl}_3$ ). **<sup>1</sup>H NMR** ( $\text{CDCl}_3$ , 400 MHz): 7.28 (m, 4H), 7.25–7.21 (m, 6H), 7.17–7.12 (m, 6H), 7.03 (m, 4H), 3.71 (s, 2H), 3.62 (d,  $J = 13.0$ , 2H), 3.49 (d,  $J = 13.0$ , 2H). <sup>1</sup>H NMR was in agreement with that reported.<sup>1)</sup>

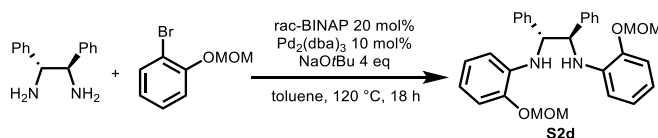

**(1R,2R)-N,N-bis(2-(methoxymethoxy)phenyl)-1,2-diphenylethane-1,2-diamine (S2d)**: Under argon atmosphere, to a mixture of  $\text{Pd}_2(\text{dba})_3$  (0.10 g, 0.10 mmol), *rac*-BINAP (0.12 g, 0.20 mmol), and  $\text{NaOtBu}$  (380 mg, 3.95 mmol) was added (*R,R*)-diphenyl-1,2-ethanediamine (212 mg, 1.00 mmol) in toluene (5 mL). The mixture was stirred for 30 min at rt, and a solution of 1-bromo-2-(methoxymethoxy)benzene (0.56 g, 2.6 mmol) in toluene (2 mL) was added. The mixture was heated under reflux for 18 h. After cooling to rt, the mixture was filtered through celite, and then the filtrate was concentrated

1) Kobayashi, S.; Matsubara, R.; Nakamura, Y.; Kitagawa, H.; Sugiura, M. *J. Am. Chem. Soc.* **2003**, *125*, 2507.

## Supporting Information I

under reduced pressure. The residue was purified by column chromatography (hexane/EtOAc 5:1) to give the title compound (500 mg, quant) as yellow solid of mp 108.8–110.3 °C:  $[\alpha]_D^{26} +94.7$  (*c* 1.16, CHCl<sub>3</sub>). **<sup>1</sup>H NMR** (CDCl<sub>3</sub>, 400 MHz): 7.22–7.18 (m, 10H), 6.94 (dd, *J* = 7.5, 1.5, 2H), 6.69 (t, *J* = 7.5, 1.5, 2H), 6.54 (t, *J* = 7.5, 1.5, 2H), 6.30 (dd, *J* = 7.5, 1.5, 2H), 5.23 (brs, 2H), 5.16 (d, *J* = 6.5, 2H), 5.11 (d, *J* = 6.5, 2H), 4.61 (s, 2H), 3.42 (6H). **<sup>13</sup>C NMR** (CDCl<sub>3</sub>, 100 MHz): 144.7 (C), 140.2 (C), 137.8 (C), 128.3 (CH), 127.4 (CH), 127.3 (CH), 122.5 (CH), 117.1 (CH), 113.9 (CH), 112.1 (CH), 95.0 (CH<sub>2</sub>), 63.9 (CH), 56.0 (CH<sub>3</sub>). **MS** (ESI) *m/z*: 507 (M + H). **HRMS** (ESI) *m/z*: [M + H]<sup>+</sup> calcd for C<sub>30</sub>H<sub>32</sub>N<sub>2</sub>O<sub>4</sub>Na, 507.2260; found, 507.2284. **IR** (NaCl): 3400, 3065, 2950, 1600, 1500, 1453, 1253, 1150, 1077, 996.

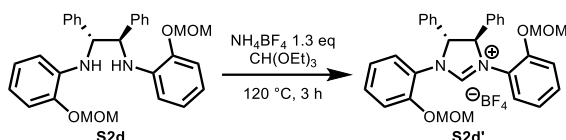

**(4*R*,5*R*)-1,3-Bis(2-(methoxymethoxy)phenyl)-4,5-diphenyl imidazolium tetrafluoroborate (S2d')**: A mixture of **S2d** (97 mg, 0.20 mmol), NH<sub>4</sub>BF<sub>4</sub> (31 mg, 0.30 mmol), and CH(OEt)<sub>3</sub> (2.0 mL, 12 mmol) was heated at 120 °C for 3 h. After cooling to rt, the formed colorless precipitate was collected by filtration and washed with Et<sub>2</sub>O to give the title compound as colorless solid (80 mg, 0.14 mmol) of mp 194.6–195.8 °C:  $[\alpha]_D^{26} +284$  (*c* 0.664, CHCl<sub>3</sub>). **<sup>1</sup>H NMR** (CDCl<sub>3</sub>, 400 MHz): 9.07 (s, 1H), 7.41–7.39 (m, 10H), 7.30–7.26 (m, 4H), 7.20 (dd, *J* = 8.0, 1.0, 2H), 6.96 (td, *J* = 8.0, 1.0, 2H), 5.77 (s, 2H), 5.33 (s, 4H), 3.51 (s, 6H). **<sup>13</sup>C NMR** (CDCl<sub>3</sub>, 100 MHz): 158.3 (CH), 151.4 (C), 135.3 (C), 130.8 (CH), 130.1 (CH), 129.6 (CH), 127.4 (CH), 126.7 (CH), 123.2 (C), 122.6 (CH), 115.4 (CH), 95.7 (CH<sub>2</sub>), 75.4 (CH), 56.6 (CH<sub>3</sub>). **MS** (ESI) *m/z*: 495 (M – BF<sub>4</sub>). **HRMS** (ESI) *m/z*: [M – BF<sub>4</sub>]<sup>+</sup> calcd for C<sub>31</sub>H<sub>31</sub>N<sub>2</sub>O<sub>4</sub>, 495.2284; found, 495.2261. **IR** (KBr): 3080, 2915, 2360, 2341, 1620, 1588, 1497, 1269, 1156, 972.

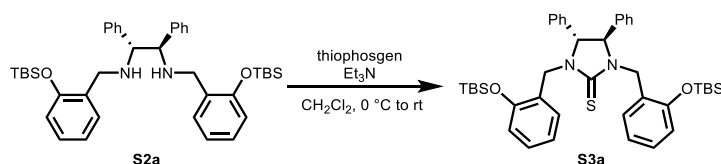

**Typical Procedure for Synthesis of Thiourea. (4*R*,5*R*)-1,3-Bis(2-(*tert*-butyldimethylsiloxy)benzyl)-4,5-diphenylimidazolidine-2-thione (S3a)**: To a solution of **S2a** (170 mg, 0.250 mmol) and Et<sub>3</sub>N (0.12 mL 0.92 mmol) in CH<sub>2</sub>Cl<sub>2</sub> (2.5 mL), was added thiophosgen (35 μL 0.46 mmol) at 0 °C. The mixture was stirred for 9 h at rt, and then water (10 mL) was added. The aqueous layer was separated and extracted with CH<sub>2</sub>Cl<sub>2</sub> (10 mL × 2). The combined organic layers were washed brine, dried over Na<sub>2</sub>SO<sub>4</sub>, and concentrated under reduced pressure. The residue was purified by column chromatography (hexane/EtOAc 20:1) to give the title compound (100 mg, 55%) as colorless oil:  $[\alpha]_D^{22} +135$  (*c* 1.04, CHCl<sub>3</sub>). **<sup>1</sup>H NMR** (CDCl<sub>3</sub>, 400 MHz): 7.43 (d, *J* = 6.0, 2H), 7.28–7.26 (m, 6H), 7.10–7.04 (m, 6H), 6.93 (td, *J* = 7.5, 1.0, 2H), 6.68 (dd, *J* = 7.0, 1.0, 2H), 5.54 (d, *J* = 15.5, 2H), 4.41 (s, 2H), 4.30 (d, *J* = 15.5, 2H), 0.72 (s, 18H), 0.05 (s, 6H), –0.02 (s, 6H). **<sup>13</sup>C NMR** (CDCl<sub>3</sub>, 100 MHz): 183.5 (C), 153.4 (C), 138.9 (C), 129.0 (CH), 128.8 (CH), 128.7 (CH), 128.5 (CH), 126.8 (CH), 125.5 (C), 121.3 (CH), 110.7 (CH), 69.3 (CH), 42.8 (CH<sub>2</sub>), 25.5 (CH<sub>3</sub>), 18.0 (C), –4.5 (CH<sub>3</sub>). **MS** (ESI) *m/z*: 717 (M + Na). **HRMS** (ESI) *m/z*: [M + H]<sup>+</sup> calcd for C<sub>41</sub>H<sub>55</sub>N<sub>2</sub>O<sub>2</sub>S, 695.3523; found, 695.3504. **IR** (NaCl): 2972, 2856, 1948, 1730, 1599, 1582, 1258, 1105, 920, 778.

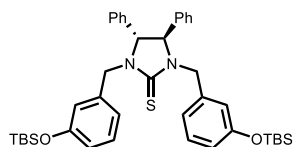



## Supporting Information I

**(4*R*,5*R*)-1,3-Bis(3-(*tert*-butyldimethylsiloxy)-4,5-diphenylimidazolidine-2-thione (S3b):** The typical procedure using **S2b** (100 mg, 0.153 mmol), Et<sub>3</sub>N (64 μL, 0.49 mmol), and thiophosgen (20 μL, 0.26 mmol) gave the title compound (70 mg, 67%) as yellow oil:  $[\alpha]_{\text{D}}^{23} +87.5$  (*c* 1.05, CHCl<sub>3</sub>). <sup>1</sup>H NMR (CDCl<sub>3</sub>, 400 MHz): 7.30–7.26 (m, 6H), 7.12 (t, *J* = 8.5, 2H), 6.98–6.96 (m, 4H), 6.84 (d, *J* = 7.5, 2H), 6.72–6.70 (m, 4H), 5.81 (d, *J* = 15.0, 2H), 4.3 (s, 2H), 3.70 (d, *J* = 15.0, 2H), 0.96 (s, 18H), 0.17 (s, 6H), 0.16 (s, 6H). <sup>13</sup>C NMR (CDCl<sub>3</sub>, 100 MHz): 183.6 (C), 153.4 (C), 138.9 (C), 138.0 (C), 129.0 (CH), 128.7 (CH), 128.5 (CH), 128.0 (CH), 126.9 (CH), 121.3 (CH), 118.8 (CH), 69.2 (CH), 42.8 (CH<sub>2</sub>), 20.6 (CH<sub>3</sub>), 17.9 (C), –4.4 (CH<sub>3</sub>). **MS** (ESI) *m/z*: 695 (M + H). **HRMS** (ESI) *m/z*: [M + H]<sup>+</sup> calcd for C<sub>41</sub>H<sub>55</sub>N<sub>2</sub>O<sub>2</sub>Si<sub>2</sub>S, 695.3523; found, 695.3535. **IR** (NaCl): 3020, 2953, 2860, 1615, 1450, 1410, 1270, 1210, 980, 860.

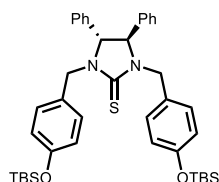

**(4*R*,5*R*)-1,3-Bis(4-(*tert*-butyldimethylsiloxy)benzyl)-4,5-diphenylimidazolidine-2-thione (S3c):** The typical procedure using **S2c** (110 mg, 0.168 mmol), Et<sub>3</sub>N (64 μL, 0.49 mmol), and thiophosgen (21 μL, 0.27 mmol) gave the title compound (85.2 mg, 80%) as colorless solid of mp 115.2–116.7 °C:  $[\alpha]_{\text{D}}^{31} +43.3$  (*c* 1.09, CHCl<sub>3</sub>). <sup>1</sup>H NMR (CDCl<sub>3</sub>, 400 MHz): 7.29–7.25 (m, 6H), 7.11 (d, *J* = 8.0, 4H), 6.93 (m, 4H), 6.74 (d, *J* = 8.0, 4H), 5.79 (d, *J* = 15.0, 2H), 4.29 (s, 2H), 3.69 (d, *J* = 15.0, 2H), 0.96 (s, 18H), 0.17 (s, 12H). <sup>13</sup>C NMR (CDCl<sub>3</sub>, 100 MHz): 182.2 (C), 155.2 (C), 138.4 (C), 129.8 (CH), 129.0 (CH), 128.8 (C), 128.6 (CH), 127.1 (CH), 120.1 (CH), 68.9 (CH), 48.3 (CH<sub>2</sub>), 25.7 (CH<sub>3</sub>), 18.2 (C), –4.4 (CH<sub>3</sub>). **MS** (ESI) *m/z*: 695 (M + H). **HRMS** (ESI) *m/z*: [M + H]<sup>+</sup> calcd for C<sub>41</sub>H<sub>55</sub>N<sub>2</sub>O<sub>2</sub>Si<sub>2</sub>S, 695.3523; found, 695.3502. **IR** (NaCl): 2980, 2850, 1510, 1460, 1410, 1260, 1220, 1120, 910, 840.

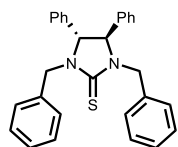

**(4*R*,5*R*)-1,3-Dibenzyl-4,5-diphenylimidazolidine-2-thione (4e):** The typical procedure using **S1e** (0.10 g, 0.25 mmol), Et<sub>3</sub>N (0.10 mL, 0.75 mmol), thiophosgen (25 μL, 0.30 mmol) and column chromatography (hexane/EtOAc 10:1) gave the title compound (120 mg, quantity) as colorless solid of mp 171.1–172.2 °C:  $[\alpha]_{\text{D}}^{31} +152$  (*c* 0.153, CHCl<sub>3</sub>). <sup>1</sup>H NMR (CDCl<sub>3</sub>, 400 MHz): 7.30–7.23 (m, 16H), 6.97 (m, 4H), 5.87 (d, *J* = 15.0, 2H), 4.30 (s, 2H), 3.78 (d, *J* = 15.0, 2H). <sup>1</sup>H NMR was in agreement with that reported.<sup>2)</sup>

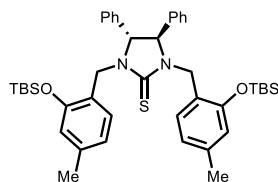

**(4*R*,5*R*)-1,3-Bis(2-(*tert*-butyldimethylsiloxy)-4-methylbenzyl)-4,5-diphenylimidazolidine-2-thione (S3f):** The typical procedure using **S2f** (170 mg, 0.250 mmol) and CH<sub>2</sub>Cl<sub>2</sub> (10 mL) gave the title compound (100 mg, 55 %) as yellow oil:  $[\alpha]_{\text{D}}^{23} +91.7$  (*c* 1.54, CHCl<sub>3</sub>). <sup>1</sup>H NMR (CDCl<sub>3</sub>, 400 MHz): 7.31–7.26 (m, 8H), 7.04 (m, 4H), 7.75 (d, *J* = 8.0, 2H), 6.50 (s, 2H), 5.52 (d, *J* = 15.0, 2H), 4.40 (s, 2H), 4.23 (d, *J* = 15.0, 2H), 2.25 (s, 6H), 0.71 (s, 18H), 0.04 (s, 6H), 0.01 (s, 6H). <sup>13</sup>C

2) Ryoda, A.; Yajima, N.; Haga, T.; Kumamoto, T.; Nakanishi, W.; Kawahata, M.; Yamaguchi, K.; Ishikawa, T. *J. Org. Chem.* 2008, 73, 1, 133.

## Supporting Information I

**NMR** (CDCl<sub>3</sub>, 100 MHz): 183.4 (C), 153.2 (C), 139.0 (C), 137.9 (C), 129.0 (CH), 128.5 (CH), 128.4 (CH), 126.9 (CH), 123.3 (C), 122.1 (CH), 119.5 (CH), 69.0 (CH), 42.6 (CH<sub>2</sub>), 25.5 (CH<sub>3</sub>), 21.2 (CH<sub>3</sub>). 17.9 (C), -4.4 (CH<sub>3</sub>). **MS** (ESI) *m/z*: 723 (M + H). **HRMS** (ESI) *m/z*: [M + H]<sup>+</sup> calcd for C<sub>43</sub>H<sub>59</sub>N<sub>2</sub>O<sub>2</sub>Si<sub>2</sub>S, 723.3836; found, 723.3863. **IR** (NaCl): 2950, 2910, 2860, 1470, 1400, 1320, 1280, 1120, 820, 770.

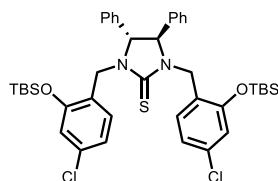

**(4*R*,5*R*)-1,3-Bis(2-(*tert*-butyldimethylsiloxy)-4-chlorobenzyl)-4,5-diphenylimidazolidine-2-thione (S3g)**: The typical procedure using **S2g** (550 mg, 1.11 mmol), Et<sub>3</sub>N (0.47 mL, 3.3 mmol), thiophosgen (93 μL, 1.2 mmol), CH<sub>2</sub>Cl<sub>2</sub> (10 mL), and column chromatography (hexane/EtOAc 10:1) gave the title compound (800 mg, 94%) as colorless solid of mp 176.4–178.0 °C: [α]<sub>D</sub><sup>31</sup> +76.0 (*c* 1.12, CHCl<sub>3</sub>). **<sup>1</sup>H NMR** (CDCl<sub>3</sub>, 400 MHz): 7.34 (d, *J* = 8.0, 2H), 7.30–7.24 (m, 6H), 7.01 (m, 4H), 6.91 (dd, *J* = 8.0, 2.0, 2H), 6.67 (d, *J* = 2.0, 2H), 5.48 (d, *J* = 16.0, 2H), 4.36 (s, 2H), 4.24 (d, *J* = 16.0, 2H), 0.71 (s, 18H), 0.06 (s, 6H), 0.00 (s, 6H). **<sup>13</sup>C NMR** (CDCl<sub>3</sub>, 100 MHz): 183.6 (C), 154.0 (C), 138.5 (C), 133.0 (C), 129.5 (CH), 129.2 (CH), 128.7 (CH), 126.7 (CH), 125.2 (C), 121.5 (CH), 119.1 (CH), 69.3 (CH), 42.5 (CH<sub>2</sub>), 25.4 (CH<sub>3</sub>), 17.9 (C), -4.5 (CH<sub>3</sub>). **MS** (ESI) *m/z*: 763 (M + H), 765 (M + 2 + H), 767 (M + 4 + H). **HRMS** (ESI) *m/z*: [M + H]<sup>+</sup> calcd for C<sub>41</sub>H<sub>53</sub>N<sub>2</sub>O<sub>2</sub>Si<sub>2</sub>SCl<sub>2</sub>, 763.2743; found, 763.2723. **IR** (KBr): 2950, 2850, 1590, 1560, 1480, 1400, 1350, 1270, 1200, 950.

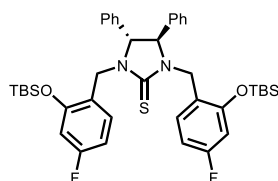

**(4*R*,5*R*)-1,3-Bis(2-(*tert*-butyldimethylsiloxy)-4-fluorobenzyl)-4,5-diphenylimidazolidine-2-thione (S3h)**: The typical procedure using **S2h** (540 mg, 0.784 mmol), Et<sub>3</sub>N (0.33 mL, 2.4 mmol), thiophosgen (66 μL, 0.72 mmol), CH<sub>2</sub>Cl<sub>2</sub> (10 mL), and column chromatography (hexane/EtOAc 15:1) gave the title compound (440 mg, 77%) as pale orange amorphous of mp 145.0–147.0 °C: [α]<sub>D</sub><sup>23</sup> +141 (*c* 1.25, CHCl<sub>3</sub>). **<sup>1</sup>H NMR** (CDCl<sub>3</sub>, 400 MHz): 7.38 (dd, *J* = 8.0, 6.0, 2H), 7.29–7.27 (m, 6H), 7.01–6.99 (m, 4H), 6.65 (td, *J* = 8.0, 2.5, 2H), 6.39 (dd, *J* = 8.0, 2.5, 2H), 5.45 (d, *J* = 15.5, 2H), 4.35 (s, 2H), 4.24 (d, *J* = 15.5, 2H), 0.71 (s, 18H), 0.05 (s, 6H), 0.00 (s, 6H). **<sup>13</sup>C NMR** (CDCl<sub>3</sub>, 100 MHz): 183.4 (C), 163.4 (d, *J* = 245, C), 154.4 (d, *J* = 10, C), 138.7 (C), 129.6 (d, *J* = 9, CH), 129.1 (CH), 128.6 (CH), 126.7 (CH), 122.4 (C), 108.2 (d, *J* = 21, CH), 106.3 (d, *J* = 21, CH), 69.3 (CH), 42.4 (CH<sub>2</sub>), 25.4 (CH<sub>3</sub>), 17.9 (C), -4.5 (CH<sub>3</sub>). **MS** (ESI) *m/z*: 731 (M + H). **HRMS** (ESI) *m/z*: [M + H]<sup>+</sup> calcd for C<sub>41</sub>H<sub>53</sub>N<sub>2</sub>O<sub>2</sub>F<sub>2</sub>Si<sub>2</sub>S, 731.3334; found, 731.3328. **IR** (KBr): 2930, 2870, 1560, 1500, 1460, 1440, 1330, 1290, 1240, 1100.

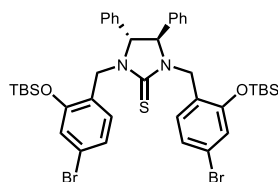

**(4*R*,5*R*)-1,3-Bis(2-(*tert*-butyldimethylsiloxy)-4-bromobenzyl)-4,5-diphenylimidazolidine-2-thione (S3i)**: The typical procedure using **S2i** (530 mg, 0.655 mmol), Et<sub>3</sub>N (0.30 mL, 2.3 mmol), thiophosgen (55 μL, 0.72 mmol), CH<sub>2</sub>Cl<sub>2</sub> (10 mL), and column chromatography (hexane/EtOAc 15:1 to 10:1) gave the title compound as colorless solid of mp 165.8–166.6°C:

## Supporting Information I

$[\alpha]_{\text{D}}^{23} +45.6$  ( $c$  1.24,  $\text{CHCl}_3$ ).  **$^1\text{H NMR}$**  ( $\text{CDCl}_3$ , 400 MHz): 7.30–7.27 (m, 8H), 7.06 (d,  $J = 8.0$ , 2.0, 2H), 7.01 (m, 4H), 6.82 (d,  $J = 2.0$ , 2H), 5.44 (d,  $J = 14.0$ , 2H), 4.37 (s, 2H), 4.23 (d,  $J = 14.0$ , 2H), 0.71 (s, 18H), 0.05 (s, 6H), 0.00 (s, 6H).  **$^{13}\text{C NMR}$**  ( $\text{CDCl}_3$ , 100 MHz): 183.6 (C), 154.1 (C), 138.4 (C), 129.9 (CH), 129.2 (CH), 128.7 (CH), 126.7 (CH), 125.7 (C), 124.5 (CH), 122.0 (CH), 120.9 (C), 69.3 (CH), 42.5 ( $\text{CH}_2$ ), 25.4 ( $\text{CH}_3$ ), 17.9 (C),  $-4.4$  ( $\text{CH}_3$ ). **MS** (ESI)  $m/z$ : 851 (M + H), 853 (M + 2 + H), 855 (M + 4 + H). **HRMS** (ESI)  $m/z$ :  $[\text{M} + \text{H}]^+$  calcd for  $\text{C}_{41}\text{H}_{53}\text{N}_2\text{O}_2\text{Si}_2\text{S}$ , 851.1733; found, 851.1730. **IR** (NaCl): 2950, 2890, 1580, 1470, 1400, 1260, 1110, 950, 820, 770.

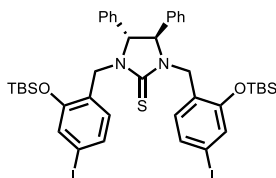

**(4*R*,5*R*)-1,3-Bis(2-(*tert*-butyldimethylsilyloxy)-4-iodobenzyl)-4,5-diphenylimidazolidine-2-thione (S3j)**: The typical procedure using **S2j** (440 mg, 0.487 mmol),  $\text{Et}_3\text{N}$  (0.33 mL, 2.4 mmol), thiophosgen (66  $\mu\text{L}$ , 0.72 mmol),  $\text{CH}_2\text{Cl}_2$  (10 mL), and column chromatography (hexane/ $\text{EtOAc}$  15:1) gave the title compound (440 mg, 77%) as pale orange amorphous of mp 193.0–194.1  $^\circ\text{C}$ :  $[\alpha]_{\text{D}}^{28} +10.3$  ( $c$  1.50,  $\text{CHCl}_3$ ).  **$^1\text{H NMR}$**  ( $\text{CDCl}_3$ , 400 MHz): 7.30–7.24 (m, 8H), 7.12 (d,  $J = 8.0$ , 2H), 7.01–6.99 (m, 6H), 5.45 (d,  $J = 14.0$ , 2H), 4.37 (s, 2H), 4.22 (d,  $J = 14.0$ , 2H), 0.70 (s, 18H), 0.05 (s, 6H),  $-0.02$  (s, 6H).  **$^{13}\text{C NMR}$**  ( $\text{CDCl}_3$ , 100 MHz): 183.6 (C), 154.1 (C), 138.4 (C), 130.5 (CH), 130.0 (CH), 129.2 (CH), 128.7 (CH), 127.9 (CH), 126.7 (CH), 126.5 (C), 92.2 (C), 69.4 (CH), 42.6 ( $\text{CH}_2$ ), 25.4 ( $\text{CH}_3$ ), 17.9 (C),  $-4.5$  ( $\text{CH}_3$ ). **MS** (ESI)  $m/z$ : 947 (M + H). **HRMS** (ESI)  $m/z$ :  $[\text{M} + \text{H}]^+$  calcd for  $\text{C}_{41}\text{H}_{53}\text{N}_2\text{O}_2\text{Si}_2\text{I}_2$ , 947.1456; found, 947.1441. **IR** (KBr): 2980, 2850, 1580, 1480, 1360, 1260, 1100, 930, 830, 780.

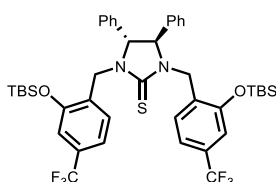

**(4*R*,5*R*)-1,3-Bis(2-(*tert*-butyldimethylsilyloxy)-4-(trifluoromethyl)benzyl)-4,5-diphenylimidazolidine-2-thione (S3k)**: The typical procedure using **S2k** (530 mg, 0.654 mmol),  $\text{Et}_3\text{N}$  (0.30 mL, 2.1 mmol), thiophosgen (60  $\mu\text{L}$ , 0.76 mmol), and  $\text{CH}_2\text{Cl}_2$  (15 mL) gave the title compound (420 mg, 73%) as pale yellow amorphous of mp 132.8–133.8  $^\circ\text{C}$ :  $[\alpha]_{\text{D}}^{23} +88.5$  ( $c$  1.13,  $\text{CHCl}_3$ ).  **$^1\text{H NMR}$**  ( $\text{CDCl}_3$ , 400 MHz): 7.52 (d,  $J = 8.0$ , 2H), 7.32–7.29 (m, 6H), 7.19 (d,  $J = 8.0$ , 2H), 7.04 (m, 4H), 6.90 (s, 2H), 5.52 ( $J = 16.0$ , 2H), 4.44 (s, 2H), 4.36 (d,  $J = 16.0$ , 2H), 0.74 (s, 18H), 0.09 (s, 6H), 0.00 (s, 6H).  **$^{13}\text{C NMR}$**  ( $\text{CDCl}_3$ , 100 MHz): 183.9 (C), 153.5 (C), 138.2 (C), 130.7 (C), 130.4 (q,  $J = 32$ , C), 129.3 (CH), 128.9 (CH), 126.6 (CH), 123.5 (q,  $J = 270$ , C), 117.9 (CH), 117.9 (CH), 115.5 (CH), 69.7 (CH), 42.9 ( $\text{CH}_2$ ), 25.4 ( $\text{CH}_3$ ), 17.9 (C),  $-4.5$  ( $\text{CH}_3$ ). **MS** (ESI)  $m/z$ : 831 (M + H). **HRMS** (ESI)  $m/z$ :  $[\text{M} + \text{H}]^+$  calcd for  $\text{C}_{43}\text{H}_{53}\text{N}_2\text{O}_2\text{F}_6\text{Si}_2\text{S}$ , 831.3271; found, 831.3306. **IR** (NaCl): 2930, 2840, 1630, 1420, 1340, 1250, 1125, 960, 840, 770.

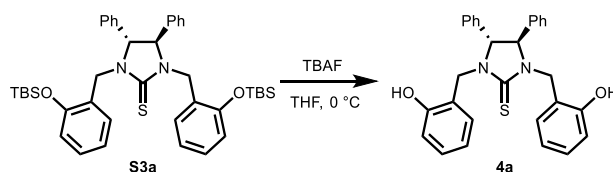

**Typical Procedure for Deprotection of Chiral Lewis Base Catalyst. (4*R*,5*R*)-1,3-Bis(2-hydroxybenzyl)-4,5-diphenylimidazolidine-2-thione (4a)**: To a solution of **S3a** (100 mg, 0.144 mmol) in THF (10 mL), was added a 1.0 M THF solution

## Supporting Information I

of TBAF (2.9 mL, 2.9 mmol) at 0 °C. The mixture was stirred for 30 min, and then sat NH<sub>4</sub>Cl aq (30 mL) was added. The whole was extracted with Et<sub>2</sub>O (20 mL × 3). The combined organic layers were washed with sat NaHCO<sub>3</sub> aq and brine, dried over Na<sub>2</sub>SO<sub>4</sub>, and concentrated under reduced pressure. The residue was purified by column chromatography (hexane/EtOAc 5:1) to give the title compound (60 mg, 90%) as colorless solid of mp 163.5–165.5 °C: [ $\alpha$ ]<sub>D</sub><sup>27</sup> +301 (*c* 1.16, CHCl<sub>3</sub>). **<sup>1</sup>H NMR** (CDCl<sub>3</sub>, 400 MHz): 7.42 (brs, 2H), 7.33–7.30 (m, 6H), 7.17 (m, 2H), 7.01–6.94 (m, 6H), 6.69–6.61 (m, 4H), 5.52 (d, *J* = 15.0, 2H), 4.41 (s, 2H), 3.96 (d, *J* = 15.0, 2H). **<sup>13</sup>C NMR** (CDCl<sub>3</sub>, 100 MHz): 179.4 (C), 155.4 (C), 137.2 (C), 131.4 (CH), 130.1 (CH), 129.4 (CH), 129.1 (CH), 127.2 (CH), 119.8 (CH), 119.7 (C), 117.3 (CH), 70.0 (CH), 45.8 (CH<sub>2</sub>). **MS** (ESI) *m/z*: 467 (M + H). **HRMS** (ESI) *m/z*: [M + H]<sup>+</sup> calcd for C<sub>29</sub>H<sub>27</sub>N<sub>2</sub>O<sub>2</sub>S, 467.1793; found, 467.1772. **IR** (KBr): 3744, 2914, 1490, 1425, 1348, 1289, 1217, 1092, 923, 749.

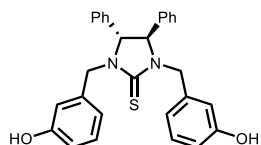

**(4R,5R)-1,3-Bis(3-hydroxybenzyl)-4,5-diphenylimidazolidine-2-thione (4b)**: The typical procedure using **S3b** (100 mg, 0.144 mmol), THF (10 mL), a 1.0 M THF solution of TBAF (2.8 mL, 2.8 mmol), and column chromatography (hexane/EtOAc = 5:1 and then CHCl<sub>3</sub>:MeOH = 1:5) gave the title compound (60.3 mg, 92%) as pale yellow amorphous of mp 94.0–95.5 °C: [ $\alpha$ ]<sub>D</sub><sup>23</sup> +93.7 (*c* 1.50, CHCl<sub>3</sub>). **<sup>1</sup>H NMR** (CDCl<sub>3</sub>, 400 MHz): 7.27–7.24 (m, 6H), 7.08 (dd, *J* = 8.0, 7.0, 2H), 6.97 (m, 4H), 6.87 (s, 2H), 6.74 (d, *J* = 8.0, 2H), 6.66 (d, *J* = 7.0, 2H), 5.69 (d, *J* = 15.0, 2H), 4.43 (s, 2H), 3.78 (d, *J* = 15.0, 2H). **<sup>13</sup>C NMR** (CDCl<sub>3</sub>, 100 MHz): 182.2 (C), 156.0 (C), 137.9 (C), 137.6 (C), 129.8 (CH), 129.2 (CH), 128.8 (CH), 127.1 (CH), 120.6 (CH), 115.0 (CH), 114.9 (CH), 69.4 (CH), 48.3 (CH<sub>2</sub>). **MS** (ESI) *m/z*: 467 (M + H). **HRMS** (ESI) *m/z*: [M + H]<sup>+</sup> calcd for C<sub>29</sub>H<sub>27</sub>N<sub>2</sub>O<sub>2</sub>S, 467.1793; found, 467.1772. **IR** (KBr): 3560, 2920, 1590, 1450, 1410, 1350, 1300, 1220, 1150, 960.

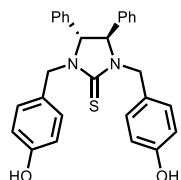

**(4R,5R)-1,3-Bis(4-hydroxybenzyl)-4,5-diphenylimidazolidine-2-thione (4c)**: The typical procedure using **S3c** (79.8 mg, 0.115 mmol), THF (10 mL), a 1.0 M THF solution of TBAF (2.3 mL, 2.3 mmol), and column chromatography (hexane/EtOAc = 9:1 and then CHCl<sub>3</sub>:MeOH = 1:9) gave the title compound (35.9 mg, 67%) as colorless amorphous of mp 176.0–178.2 °C: [ $\alpha$ ]<sub>D</sub><sup>23</sup> +92.2 (*c* 0.668, CHCl<sub>3</sub>). **<sup>1</sup>H NMR** (CDCl<sub>3</sub>, 400 MHz): 7.30–7.23 (m, 6H), 7.08 (m, 4H), 6.93 (m, 4H), 6.74 (d, *J* = 8.0, 4H), 5.76 (d, *J* = 15.0, 2H), 4.27 (s, 2H), 3.69 (d, *J* = 15.0, 2H). **<sup>13</sup>C NMR** (CDCl<sub>3</sub>, 100 MHz): 182.0 (C), 155.3 (C), 138.1 (C), 129.9 (CH), 129.1 (CH), 128.7 (CH), 127.8 (C), 127.0 (CH), 115.4 (CH), 69.0 (CH), 48.3 (CH<sub>2</sub>). **MS** (ESI) *m/z*: 467 (M + H). **HRMS** (ESI) *m/z*: [M + H]<sup>+</sup> calcd for C<sub>29</sub>H<sub>27</sub>N<sub>2</sub>O<sub>2</sub>S, 467.1793; found, 467.1772. **IR** (KBr): 3280, 3000, 2920, 1610, 1590, 1510, 1450, 1350, 1200, 1150.

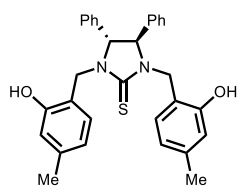

**(4R,5R)-1,3-Bis(2-hydroxy-4-methylbenzyl)-4,5-diphenylimidazolidine-2-thione (4f)**: The typical procedure using **S3f**

## Supporting Information I

(49 mg, 0.068 mmol), THF (5 mL), a 1.0 M THF solution of TBAF (2.0 mL, 2.0 mmol), and column chromatography (hexane/EtOAc 4:1) gave the title compound (30 mg, 90%) as colorless solid of mp 133.4–145.0 °C:  $[\alpha]_D^{30} +337$  (*c* 1.00, CHCl<sub>3</sub>). **<sup>1</sup>H NMR** (CDCl<sub>3</sub>, 400 MHz): 7.40 (brs, 2H), 7.35–7.32 (m, 6H), 7.01 (m, 4H), 6.78 (s, 2H), 6.50–6.48 (m, 4H), 5.51 (d, *J* = 15.0, 2H), 4.41 (s, 2H), 3.87 (d, *J* = 15.0, 2H), 2.25 (s, 6H). **<sup>13</sup>C NMR** (CDCl<sub>3</sub>, 100 MHz): 179.3 (C), 155.3 (C), 140.3 (C), 137.3 (C), 131.2 (CH), 129.4 (CH), 129.0 (CH), 127.3 (CH), 120.6 (CH), 117.9 (CH), 116.7 (C), 66.9 (CH), 45.7 (CH<sub>2</sub>), 21.3 (CH<sub>3</sub>). **MS** (ESI) *m/z*: 495 (M + H). **HRMS** (ESI) *m/z*: [M + H]<sup>+</sup> calcd for C<sub>31</sub>H<sub>31</sub>N<sub>2</sub>O<sub>2</sub>S, 495.2106; found, 495.2088. **IR** (NaCl): 3330, 2910, 1630, 1560, 1490, 1410, 1280, 1220, 940, 770.

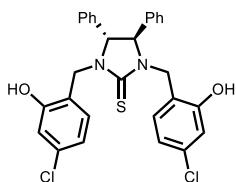

**(4R,5R)-1,3-Bis(2-hydroxy-4-chlorobenzyl)-4,5-diphenylimidazolidine-2-thione (4g)**: The typical procedure using **S3g** (600 mg, 0.790 mmol), THF (30 mL), a 1.0 M THF solution of TBAF (15.0 mL, 15.0 mmol) and column chromatography (hexane/EtOAc 3:1 to 1:1) followed by recrystallization from CH<sub>2</sub>Cl<sub>2</sub>/hexane gave the title compound (208 mg, 49%) as colorless solid of mp 136.4–137.0 °C:  $[\alpha]_D^{23} +251$  (*c* 1.07, CHCl<sub>3</sub>). **<sup>1</sup>H NMR** (CDCl<sub>3</sub>, 400 MHz): 7.69 (brs, 2H), 7.38–7.32 (m, 6H), 7.00–6.95 (m, 6H), 6.64 (dd, *J* = 8.0, 2.0, 2H), 6.50 (d, *J* = 8.0, 2H), 5.39 (d, *J* = 12.0, 2H), 4.39 (s, 2H), 3.99 (d, *J* = 12.0, 2H). **<sup>13</sup>C NMR** (CDCl<sub>3</sub>, 100 MHz): 179.6 (C), 156.2 (C), 136.6 (C), 135.4 (C), 132.1 (CH), 129.5 (CH), 129.3 (CH), 127.1 (CH), 120.0 (CH), 118.3 (C), 117.7 (CH), 70.4 (CH), 45.4 (CH<sub>2</sub>). **MS** (ESI) *m/z*: 535 (M + H), 537 (M + 2 + H), 539 (M + 4 + H). **HRMS** (ESI) *m/z*: [M + H]<sup>+</sup> calcd for C<sub>29</sub>H<sub>25</sub>N<sub>2</sub>O<sub>2</sub>SCl<sub>2</sub>, 535.1014; found, 535.1011. **IR** (NaCl): 3220, 2910, 2870, 1600, 1490, 1400, 1200, 890, 740, 680.

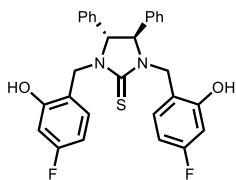

**(4R,5R)-1,3-Bis(2-hydroxy-4-fluorobenzyl)-4,5-diphenylimidazolidine-2-thione (4h)**: The typical procedure using **S3h** (440 mg, 0.602 mmol), THF (6 mL), a 1.0 M THF solution of TBAF (6.0 mL, 6.0 mmol), and column chromatography followed by recrystallization from CH<sub>2</sub>Cl<sub>2</sub>/hexane gave the title compound (220 mg, 73%) as beige powder of mp 139.4–140.4 °C:  $[\alpha]_D^{30} +266$  (*c* 1.08, CHCl<sub>3</sub>). **<sup>1</sup>H NMR** (CDCl<sub>3</sub>, 400 MHz): 7.73 (brs, 2H), 7.40–7.30 (m, 6H), 6.98 (m, 4H), 6.68 (dd, *J* = 8.0, 2.5, 2H), 6.52 (dd, *J* = 8.0, 7.5, 2H), 6.36 (dd, *J* = 8.0, 7.5, 2.5, 2H), 5.39 (d, *J* = 15.5, 2H), 4.39 (s, 2H), 4.00 (d, *J* = 15.5, 2H). **<sup>13</sup>C NMR** (CDCl<sub>3</sub>, 100 MHz): 179.5 (C), 163.5 (d, *J* = 245, C), 157.1 (d, *J* = 12, C), 136.8 (C), 132.2 (d, *J* = 10, CH), 129.5 (CH), 129.3 (CH), 127.1 (CH), 115.7 (C), 106.7 (d, *J* = 20, CH), 104.7 (d, *J* = 20, CH), 70.2 (CH), 46.0 (CH<sub>2</sub>). **MS** (ESI) *m/z*: 535 (M + H). **HRMS** (ESI) *m/z*: [M + H]<sup>+</sup> calcd for C<sub>29</sub>H<sub>25</sub>N<sub>2</sub>O<sub>2</sub>F<sub>2</sub>S, 503.1605; found, 503.1602. **IR** (KBr): 3490, 3000, 2860, 1500, 1470, 1420, 1340, 1220, 1120, 800.

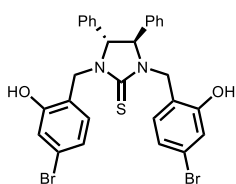

**(4R,5R)-1,3-Bis(2-hydroxy-4-bromobenzyl)-4,5-diphenylimidazolidine-2-thione (4i)**: The typical procedure using **S3i**

## Supporting Information I

(250 mg, 0.293 mmol), THF (5 mL), a 1.0 M THF solution of TBAF (3.0 mL, 3.0 mmol), and column chromatography (hexane/EtOAc 1:20 to 1:1) gave brown oil (230 mg) including the title compound and impurity. The oil was dissolved in pyridine (1 mL) and Ac<sub>2</sub>O (0.1 mL, 0.1 mmol), and the mixture was heated under reflux for 1 h. After the mixture was cooled to rt, the reaction was quenched by the addition of water. The aqueous layer was separated and extracted with EtOAc (5 mL × 3). The combined organic layers were washed with 2 M HCl aq and brine, dried over Na<sub>2</sub>SO<sub>4</sub>, and concentrated under reduced pressure. The residue was purified by column chromatography (hexane/EtOAc 5:1) to give the acetylated product (200 mg, quant) as colorless amorphous. The amorphous and K<sub>2</sub>CO<sub>3</sub> (170 mg, 1.23 mmol) were suspended in MeOH (5 mL) and stirred at rt for 1 h. The mixture was diluted with Et<sub>2</sub>O (5 mL) and poured into water (10 mL). The aqueous layer was separated and extracted with Et<sub>2</sub>O (5 mL × 3). The combined organic layers were washed with brine, dried over Na<sub>2</sub>SO<sub>4</sub>, and concentrated under reduced pressure. The residue was purified by column chromatography (hexane/EtOAc 5:1) to give the title compound (130 mg, 3 steps 72%) as colorless amorphous of mp 111.5–112.4 °C: [α]<sub>D</sub><sup>23</sup> +83.4 (*c* 1.00, CHCl<sub>3</sub>). **<sup>1</sup>H NMR** (CDCl<sub>3</sub>, 400 MHz): 7.66 (s, 2H), 7.38–7.25 (m, 6H), 7.11 (d, *J* = 2.0, 2H), 6.99–6.96 (m, 4H), 6.78 (dd, *J* = 8.0, 2.0, 2H), 6.44 (d, *J* = 8.0, 2H), 5.38 (d, *J* = 16.0, 2H), 4.39 (s, 2H), 3.98 (d, *J* = 16.0, 2H). **<sup>13</sup>C NMR** (CDCl<sub>3</sub>, 100 MHz): 179.7 (C), 156.3 (C), 136.6 (C), 132.4 (CH), 129.5 (CH), 129.4 (CH), 127.2 (CH), 123.3 (C), 122.9 (CH), 120.6 (CH), 118.8 (C), 70.5 (CH), 45.5 (CH<sub>2</sub>). **MS** (ESI) *m/z*: 623 (M + H), 625 (M + 2 + H), 625 (M + 4 + H). **HRMS** (ESI) *m/z*: [M + K]<sup>+</sup> calcd for C<sub>29</sub>H<sub>24</sub>N<sub>2</sub>O<sub>2</sub>SBr<sub>2</sub>K, 660.9562; found, 660.9550. **IR** (KBr): 3400, 3000, 2920, 1600, 1480, 1430, 1410, 1220, 880, 700.

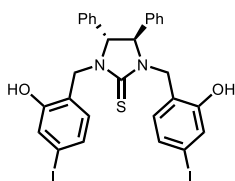

**(4R,5R)-1,3-Bis(2-hydroxy-4-iodobenzyl)-4,5-diphenylimidazolidine-2-thione (4j)**: The typical procedure using **S3j** (360 mg, 0.380 mmol), THF (10 mL), a 1.0 M THF solution of TBAF (6.0 mL, 6.0 mmol), and column chromatography (hexane/EtOAc 1:9 to 1:1) gave yellow oil (330 mg) including the title compound and impurity. The oil was dissolved in pyridine (1 mL) and Ac<sub>2</sub>O (0.1 mL, 0.1 mmol), and the mixture was heated under reflux for 0.5 h. After the mixture was cooled to rt, the reaction was quenched by the addition of water. The aqueous layer was separated and extracted with EtOAc (5 mL × 3). The combined organic layers were washed with 2 M HCl aq and brine, dried over Na<sub>2</sub>SO<sub>4</sub>, and concentrated under reduced pressure. The residue was purified by column chromatography (hexane/EtOAc 8:1 to 3:1) to give the acetylated product (260 mg, quant) as colorless amorphous. The amorphous and K<sub>2</sub>CO<sub>3</sub> (140 mg, 1.01 mmol) were suspended in MeOH (10 mL) and stirred at rt for 0.5 h. The mixture was diluted with Et<sub>2</sub>O (5 mL) and poured into water (10 mL). The aqueous layer was separated and extracted with Et<sub>2</sub>O (5 mL × 3). The combined organic layers were washed with brine, dried over Na<sub>2</sub>SO<sub>4</sub>, and concentrated under reduced pressure. The residue was purified by column chromatography (hexane/EtOAc 5:1) to give the title compound (99 mg, 3 steps 23%) as colorless amorphous of mp 144.0–145.5 °C: [α]<sub>D</sub><sup>23</sup> +41.4 (*c* 1.28, CHCl<sub>3</sub>). **<sup>1</sup>H NMR** (CDCl<sub>3</sub>, 400 MHz): 7.50 (s, 2H), 7.26–7.20 (m, 8H), 6.89–6.86 (m, 6H), 6.19 (m, 2H), 5.27 (d, *J* = 15.0, 2H), 4.29 (s, 2H), 3.87 (d, *J* = 15.0, 2H). **<sup>13</sup>C NMR** (CDCl<sub>3</sub>, 100 MHz): 179.7 (C), 156.0 (C), 136.6 (C), 132.6 (CH), 129.5 (CH), 129.3 (CH), 128.9 (CH), 127.2 (CH), 126.5 (CH), 119.6 (C), 95.0 (C), 70.4 (CH), 45.6 (CH<sub>2</sub>). **MS** (ESI) *m/z*: 719 (M + H). **HRMS** (ESI) *m/z*: [M + Na]<sup>+</sup> calcd for C<sub>29</sub>H<sub>24</sub>N<sub>2</sub>O<sub>2</sub>SI<sub>2</sub>Na, 740.9546; found, 740.9529. **IR** (NaCl): 3200, 3020, 2910, 1650, 1600, 1470, 1410, 1200, 880, 750, 700.

## Supporting Information I

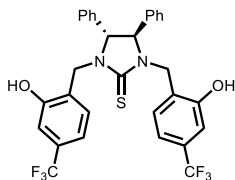

**(4R,5R)-1,3-Bis(2-hydroxy-4-(trifluoromethyl)benzyl)-4,5-diphenylimidazolidine-2-thione (4k):** The typical procedure using **S3k** (83.0 mg, 0.100 mmol), THF (3 mL), a 1.0 M THF solution of TBAF (1.0 mL, 1.0 mmol), and column chromatography (hexane/EtOAc 2:1) gave yellow oil (57 mg) including the title compound and impurity. The oil was dissolved in pyridine (1 mL) and Ac<sub>2</sub>O (0.1 mL, 0.1 mmol), and the mixture was heated under reflux for 3 h. After the mixture was cooled to rt, the reaction was quenched by the addition of water. The aqueous layer was separated and extracted with EtOAc (5 mL × 3). The combined organic layers were washed with 2 M HCl aq and brine, dried over Na<sub>2</sub>SO<sub>4</sub>, and concentrated under reduced pressure. The residue was purified by column chromatography (hexane/EtOAc 1:0, 5:1 and then 2:1) to give the acetylated product (50 mg, 77%) as colorless oil. The amorphous and K<sub>2</sub>CO<sub>3</sub> (50 mg, 0.36 mmol) were suspended in MeOH (5 mL) and stirred at rt for 3 h. The mixture was diluted with Et<sub>2</sub>O (5 mL) and poured into water (10 mL). The aqueous layer was separated and extracted with Et<sub>2</sub>O (5 mL × 3). The combined organic layers were washed with brine, dried over Na<sub>2</sub>SO<sub>4</sub>, and concentrated under reduced pressure. The residue was purified by column chromatography (hexane/EtOAc 5:1) to give the title compound (34 mg, 3 steps 56 %) as beige oil:  $[\alpha]_D^{30} +127$  (*c* 1.11, CHCl<sub>3</sub>). <sup>1</sup>H NMR (CDCl<sub>3</sub>, 400 MHz): 7.80 (s, 2H), 7.37–7.25 (m, 6H), 7.18 (s, 2H), 6.99 (m, 4H), 6.90 (d, *J* = 8.0, 2H), 6.70 (d, *J* = 8.0, 2H), 5.40 (d, *J* = 15.0, 2H), 4.43 (s, 2H), 4.18 (d, *J* = 15.0, 2H). <sup>13</sup>C NMR (CDCl<sub>3</sub>, 100 MHz): 180.0 (C), 155.7 (C), 136.5 (C), 132.3 (q, *J* = 32, C), 131.8 (CH), 129.6 (CH), 129.5 (CH), 127.0 (CH), 123.5 (q, *J* = 270, C), 123.4 (C), 116.4 (q, *J* = 5, CH), 114.5 (q, *J* = 5, CH), 70.7 (CH), 45.8 (CH<sub>2</sub>). MS (ESI) *m/z*: 603 (M + H). HRMS (ESI) *m/z*: [M + K]<sup>+</sup> calcd for C<sub>31</sub>H<sub>24</sub>N<sub>2</sub>O<sub>2</sub>SF<sub>6</sub>K, 641.1100; found, 641.1121. IR (NaCl): 3250, 3030, 2930, 1570, 1500, 1440, 1320, 1210, 1160, 740.

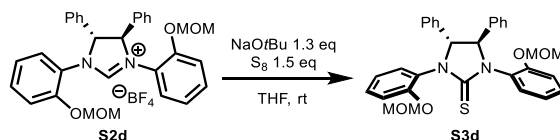

**(4R,5R)-1,3-Bis(2-(methoxymethoxy)phenyl)-4,5-diphenylimidazolidine-2-thione (S3d):** A mixture of **S2d** (58 mg, 0.10 mmol), NaOtBu (12 mg, 0.13 mmol), and S<sub>8</sub> (5.0 mg, 0.15 mmol) in THF (1.0 mL) was stirred for 3 h and then concentrated under reduced pressure. The resulting solids were dissolved in CHCl<sub>3</sub> and filtered through silica pad (CHCl<sub>3</sub>). The filtrate was concentrated under reduced pressure to give the title compound as colorless solid of mp 144.5–145.1 °C:  $[\alpha]_D^{28} -37.1$  (*c* 0.450, CHCl<sub>3</sub>). <sup>1</sup>H NMR (CDCl<sub>3</sub>, 400 MHz): 7.43 (m, 4H), 7.36–7.31 (m, 6H), 7.20 (t, *J* = 8.0, 2H), 7.15 (d, *J* = 8.0, 2H), 7.08 (d, *J* = 8.0, 2H), 6.86 (t, *J* = 8.0, 2H), 5.34 (d, *J* = 6.5, 2H), 5.28 (d, *J* = 6.5, 2H), 5.17 (s, 2H), 3.54 (s, 6H). <sup>13</sup>C NMR (acetone-*d*<sub>6</sub>, 100 MHz): 184.3 (C), 153.7 (C), 140.0 (C), 132.4 (CH), 129.2 (C), 128.8 (CH), 128.7 (CH), 128.4 (CH), 127.8 (CH), 120.9 (CH), 115.0 (CH), 94.5 (CH<sub>2</sub>), 73.0 (CH), 55.8 (CH<sub>3</sub>). MS (ESI) *m/z*: 461 (M + Na). HRMS (ESI) *m/z*: [M + H]<sup>+</sup> calcd for C<sub>31</sub>H<sub>31</sub>N<sub>2</sub>O<sub>4</sub>S, 527.2005; found, 527.2029. IR (NaCl): 3066, 2913, 2846, 1508, 1260, 1080, 990, 750.

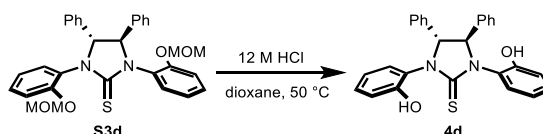

**(4R,5R)-1,3-Bis(2-hydroxybenzyl)-4,5-diphenylimidazolidine-2-thione (4d):** To a solution of **S3d** (58 mg, 0.10 mmol) in dioxane (5.0 mL) was added 12 M HCl (1.0 mL), and the mixture was heated at 50 °C for 1 h. After colling to rt, the

## Supporting Information I

mixture was concentrated under reduced pressure and purified by column chromatography (hexane/EtOAc 2:1) to give the title compound (40 mg, 2 steps 91 %) as colorless solid of mp 163.5–165.5 °C:  $[\alpha]_{\text{D}}^{28} -140$  ( $c$  0.182,  $\text{CHCl}_3$ ). **<sup>1</sup>H NMR** ( $\text{CDCl}_3$ , 400 MHz): 7.43–7.26 (m, 10H), 7.16 (td,  $J = 8.0, 1.0, 2\text{H}$ ), 7.06–7.01 (m, 4H), 6.85 (td,  $J = 8.0, 1.0, 2\text{H}$ ), 5.32 (s, 2H). **<sup>13</sup>C NMR** ( $\text{DMSO-}d_6$ , 100 MHz): 183.1 (C), 153.9 (C), 139.6 (C), 132.2 (CH), 129.1 (CH), 128.9 (CH), 128.8 (CH), 128.1 (CH), 126.9 (C), 118.9 (CH), 116.8 (CH), 72.2 (CH). **MS** (ESI)  $m/z$ : 461 (M + Na). **HRMS** (ESI)  $m/z$ : [M + H]<sup>+</sup> calcd for  $\text{C}_{27}\text{H}_{22}\text{N}_2\text{O}_2\text{NaS}$ , 461.1300; found, 461.1296. **IR** (NaCl): 3300, 3040, 2980, 2360, 1497, 1324, 752, 700.



## 4. Preparation of Stilbenecarboxylic Acids

method A

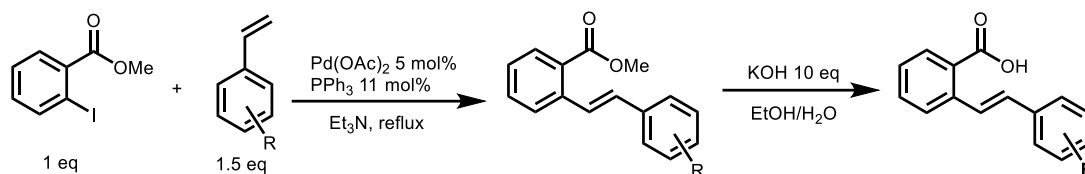

method B

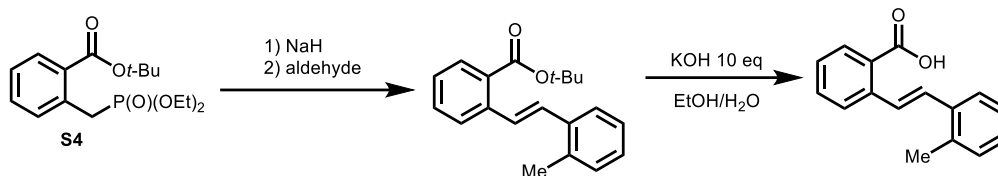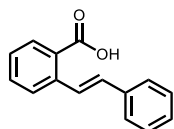

**Typical Procedure A. (*E*)-2-Styryl Benzoic Acid (1a):** A mixture of methyl *o*-iodobenzoate (4.60 g, 17.6 mmol), styrene (2.5 mL, 21 mmol), triphenylphosphine (0.30 g, 1.2 mmol), palladium acetate (0.13 g, 0.58 mmol), and triethylamine (5.3 mL, 41 mmol) was heated at 100 °C for 12 h. After cooling to rt, the mixture was diluted with EtOAc (10 mL) and washed with 2 M HCl aq (20 mL). The aqueous layer was extracted with EtOAc (20 mL  $\times$  2). The combined organic layers were washed with brine, dried over Na<sub>2</sub>SO<sub>4</sub>, and concentrated under reduced pressure. The residue was purified by flash column chromatography (hexane/EtOAc 10:1) to give methyl (*E*)-2-styrylbenzoate (4.18 g, quant) as colorless oil. A mixture of the ester (4.16 g, 17.5 mmol), EtOH (30 mL), and 6 M KOH aq (4.5 mL, 27 mmol) was stirred at rt for 12 h. The mixture was diluted with water (20 mL) and washed with Et<sub>2</sub>O. The ethereal layer was discarded, and the aqueous layer was acidified with 1 M HCl aq and extracted with Et<sub>2</sub>O (20 mL  $\times$  2). The combined organic layers were washed with brine, dried over Na<sub>2</sub>SO<sub>4</sub>, and concentrated under reduced pressure. The resulting solids were recrystallized from hexane/EtOAc to give the title compound (2.58 g, 66 %) as a colorless solid of mp 159.5–161.0 °C: <sup>1</sup>H NMR (CDCl<sub>3</sub>, 400 MHz): 8.10 (dd, *J* = 8.0, 1.0, 1H), 8.08 (d, *J* = 16.0, 1H), 7.76 (d, *J* = 7.5, 1H), 7.61–7.56 (m, 3H), 7.40–7.37 (m, 3H), 7.29 (td, *J* = 7.5, 1.0, 1H), 7.05 (d, *J* = 16.0, 1H). <sup>1</sup>H NMR was in agreement with that reported.<sup>3)</sup>

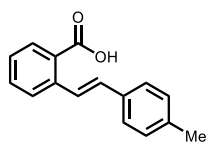

**(*E*)-2-(4-Methylstyryl)benzoic Acid (1b):** Typical procedure A using methyl *o*-iodobenzoate (560 mg, 2.20 mmol), *p*-methylstyrene (890 mg, 7.50 mmol), PPh<sub>3</sub> (140 mg, 0.534 mmol), Pd(OAc)<sub>2</sub> (56 mg, 0.25 mmol), and Et<sub>3</sub>N (2.0 mL, 15 mmol) gave (*E*)-2-(*p*-methylstyryl)benzoate (470 mg, 1.86 mmol, 84%) as colorless oil. The ester was hydrolyzed using EtOH (10 mL) and 6 M KOH (1.5 mL, 9.0 mmol) gave the title compound (430 mg, 62%) as colorless solid of mp 153.1–154.3 °C: <sup>1</sup>H NMR (CDCl<sub>3</sub>, 400 MHz): 8.11 (d, *J* = 7.5, 1H), 8.05 (d, *J* = 16.0, 1H), 7.76 (d, *J* = 7.5, 1H), 7.58 (t, *J* = 7.5, 1H), 7.48 (d, *J* = 8.0, 2H), 7.36 (t, *J* = 7.5, 1H), 7.19 (d, *J* = 8.0, 2H), 7.03 (d, *J* = 16.0, 1H), 2.39 (s, 3H). <sup>1</sup>H NMR was in agreement with that reported.<sup>3)</sup>

3) Chen, J.; Zhou, L.; Tan, C. K.; Yeung, Y.-Y. *J. Org. Chem.* **2012**, *77*, 999.

## Supporting Information I

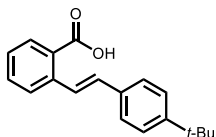

**(E)-2-(4-(*tert*-Butyl)styryl)benzoic Acid (1c):** Typical procedure A using methyl *o*-bromobenzoate (1.30 g, 6.00 mmol), *p*-*tert*-butylstyrene (1.64 g, 10.0 mmol), PPh<sub>3</sub> (160 mg, 0.600 mmol), Pd(OAc)<sub>2</sub> (67 mg, 0.30 mmol), and Et<sub>3</sub>N (5.0 mL, 38 mmol) gave (*E*)-2-(*p*-*tert*-butylstyryl)benzoate (1.65 g, 5.60 mmol, 94%) as colorless solid. The ester was hydrolyzed using EtOH (10 mL) and 6 M KOH (4.0 mL, 24.0 mmol) gave the title compound (1.25 g, 80%) as colorless solid of mp 160.0–161.5 °C: <sup>1</sup>H NMR (CDCl<sub>3</sub>, 400 MHz): 8.05 (dd, *J* = 8.0, 1.0, 1H), 8.00 (d, *J* = 16.0, 1H), 7.74 (d, *J* = 8.0, 1H), 7.56 (td, *J* = 8.0, 1.0, 1H), 7.50 (d, *J* = 8.5, 2H), 7.40 (d, *J* = 8.5, 1H), 7.34 (td, *J* = 8.0, 1.0, 2H), 7.02 (d, *J* = 16.0, 1H), 1.33 (s, 9H). <sup>1</sup>H NMR was in agreement with that reported.<sup>4)</sup>

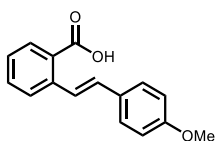

**(E)-2-(4-Methoxystyryl)benzoic Acid (1d):** Typical procedure A using methyl *o*-iodobenzoate (780 mg, 2.97 mmol), *p*-methoxystyrene (530 mg, 3.96 mmol), PPh<sub>3</sub> (60 mg, 0.22 mmol), Pd(OAc)<sub>2</sub> (24 mg, 0.11 mmol), and Et<sub>3</sub>N (1.0 mL, 7.5 mmol) gave (*E*)-2-(*p*-methoxystyryl)benzoate (490 mg, 1.83 mmol, 60%) as yellow oil. The ester was hydrolyzed using EtOH (10 mL) and 6 M KOH (1.0 mL, 6.0 mmol) gave the title compound (230 mg, 50%) as yellow solid of mp 161.4–162.9 °C: <sup>1</sup>H NMR (CDCl<sub>3</sub>, 400 MHz): 7.89–7.84 (m, 2H), 7.77 (d, *J* = 8.0, 1H), 7.54–7.45 (m, 3H), 7.30 (dt, *J* = 8.0, 1.0, 1H), 7.04 (d, *J* = 16.0, 1H), 6.91 (dd, *J* = 7.0, 2.0, 2H), 3.80 (s, 3H). <sup>1</sup>H NMR was in agreement with that reported.<sup>3)</sup>

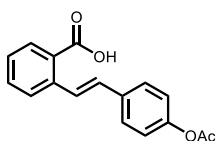

**(E)-2-(4-Acetoxy)styryl)benzoic Acid (1e):** Typical procedure A using *tert*-butyl *o*-iodobenzoate (780 mg, 2.97 mmol), *p*-acetoxy styrene (0.66 g, 5.0 mmol), PPh<sub>3</sub> (87 mg, 0.33 mmol), Pd(OAc)<sub>2</sub> (33 mg, 0.15 mmol), and Et<sub>3</sub>N (5.0 mL, 39 mmol) gave (*E*)-2-(*p*-acetoxy styryl)benzoate (840 mg, 2.48 mmol, 82%) as yellow oil. The ester was hydrolyzed using DMSO (20 mL) and 6 M KOH (6.0 mL, 36 mmol) gave (*E*)-2-(4-hydroxystyryl)benzoic acid (400 mg, 94%) as pale yellow solid. The phenol was dissolved in pyridine (5 mL) and Ac<sub>2</sub>O (5 mL, 5 mmol), and the mixture was stirred at rt for 23 h. The reaction was quenched with 2 M HCl aq (20 mL). The whole was extracted with EtOAc (5 mL × 3). The combined organic layers were washed with 2 M HCl aq and brine, dried over Na<sub>2</sub>SO<sub>4</sub>, and concentrated under reduced pressure. The residue was purified by column chromatography (hexane/EtOAc 4:1 to 1:1) to give the title compound (355 mg, 1.25 mmol) as colorless solid of mp 133.8–135.1 °C: <sup>1</sup>H NMR (CDCl<sub>3</sub>, 400 MHz): 8.06 (d, *J* = 8.0, 1H), 8.00 (d, *J* = 16.0, 1H), 7.71 (d, *J* = 8.0, 1H), 7.58–7.54 (m, 3H), 7.36 (t, *J* = 8.0, 1H), 7.09 (d, *J* = 8.0, 2H), 7.00 (d, *J* = 16.0, 1H), 2.31 (s, 3H). <sup>1</sup>H NMR was in agreement with that reported.<sup>3)</sup>

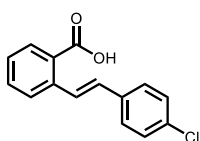

4) Triandafillidi, I.; Raftopoulou, M.; Savvidou, A.; Kokotos, C. G. *ChemCatChem* **2017**, *9*, 4120.

## Supporting Information I

**(E)-2-(4-Chlorostyryl)benzoic Acid (1f):** Typical procedure A using methyl *o*-iodobenzoate (705 mg, 2.69 mmol), *p*-chlorostyrene (500 mg, 3.62 mmol), PPh<sub>3</sub> (53 mg, 0.20 mmol), Pd(OAc)<sub>2</sub> (22 mg, 95 μmol), and Et<sub>3</sub>N (1.0 mL, 7.5 mmol) gave (*E*)-2-(*p*-chlorostyryl)benzoate (720 mg, 2.64 mmol, 98%) as colorless solid. The ester was hydrolyzed using EtOH (5 mL) and 6 M KOH (1.0 mL, 6.0 mmol) gave the title compound (453 mg, 66%) as pale yellow solid of mp 141.8–142.3 °C: <sup>1</sup>H NMR (CDCl<sub>3</sub>, 400 MHz): 8.12 (d, *J* = 7.5, 1H), 8.05 (d, *J* = 16.5, 1H), 7.73 (d, *J* = 7.5, 1H), 7.58 (t, *J* = 7.5, 1H), 7.48 (d, *J* = 8.0, 2H), 7.41–7.32 (m, 3H), 6.97 (d, *J* = 16.5, 1H). <sup>1</sup>H NMR was in agreement with that reported.<sup>3)</sup>

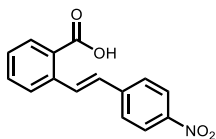

**(E)-2-(4-Nitrostyryl)benzoic Acid (1g):** Typical procedure A using methyl *o*-iodobenzoate (1.00 g, 3.96 mmol), *p*-nitrostyrene (770 mg, 5.16 mmol), PPh<sub>3</sub> (77 mg, 0.30 mmol), Pd(OAc)<sub>2</sub> (31 mg, 0.14 mmol), and Et<sub>3</sub>N (2.0 mL, 15 mmol) gave (*E*)-2-(*p*-nitrostyryl)benzoate (680 mg, 2.40 mmol, 67%) as yellow oil. The ester was hydrolyzed using EtOH (10 mL) and 9 M KOH (2.0 mL, 18 mmol) gave the title compound (390 mg, 50%) as yellow solid of mp 199.1–200.8 °C: <sup>1</sup>H NMR (CDCl<sub>3</sub>, 400 MHz): 8.14 (d, *J* = 7.5, 1H), 8.05–7.99 (m, 2H), 7.85 (d, *J* = 7.5, 1H), 7.79 (d, *J* = 7.5, 1H), 7.62 (t, *J* = 7.5, 2H), 7.52–7.41 (m, 3H). <sup>1</sup>H NMR was in agreement with that reported.<sup>3)</sup>

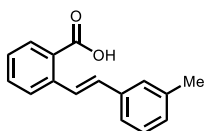

**(E)-2-(3-Methylstyryl)benzoic Acid (1h):** Typical procedure A using methyl *o*-iodobenzoate (1.26 g, 5.00 mmol), *m*-methylstyrene (890 mg, 7.50 mmol), PPh<sub>3</sub> (57 mg, 0.22 mmol), Pd(OAc)<sub>2</sub> (22 mg, 0.10 mmol), and Et<sub>3</sub>N (1.0 mL, 7.5 mmol) gave (*E*)-2-(*m*-methylstyryl)benzoate (470 mg, 1.86 mmol, 84%) as colorless oil. The ester was hydrolyzed using EtOH (10 mL) and 5 M KOH (2.0 mL, 10 mmol) gave the title compound (140 mg, 30%) as pink powder of mp 163.0–164.2 °C: <sup>1</sup>H NMR (CDCl<sub>3</sub>, 400 MHz): 8.06 (dd, *J* = 7.5, 1.0, 1H), 8.02 (d, *J* = 16.0, 1H), 7.73 (dd, *J* = 8.0, 1.0, 1H), 7.55 (ddd, *J* = 8.0, 7.5, 1.0, 1H), 7.37–7.33 (m, 3H), 7.24 (dd, *J* = 8.0, 7.5, 1H), 7.09 (dd, *J* = 8.0, 1.0, 1H), 7.00 (d, *J* = 16.0, 1H), 2.37 (s, 3H). <sup>1</sup>H NMR was in agreement with that reported.<sup>3)</sup>

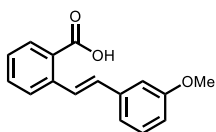

**(E)-2-(3-Methoxystyryl)benzoic Acid (1i):** Typical procedure A using methyl *o*-iodobenzoate (1.2 g, 5.0 mmol), *m*-methoxystyrene (1.0 g, 7.6 mmol), PPh<sub>3</sub> (0.14 g, 0.54 mmol), Pd(OAc)<sub>2</sub> (56 mg, 0.25 mmol), and Et<sub>3</sub>N (10 mL, 75 mmol) gave (*E*)-2-(*m*-methoxystyryl)benzoate (1.0 g, 3.7 mmol, 75%) as colorless oil. The ester was hydrolyzed using EtOH (10 mL) and 6 M KOH (2.0 mL, 12 mmol) gave the title compound (270 mg, 30%) as colorless solid of mp 244.1–245.5 °C: <sup>1</sup>H NMR (CDCl<sub>3</sub>, 400 MHz): 8.06 (dd, *J* = 7.5, 1.0, 1H), 8.02 (d, *J* = 16.0, 1H), 7.75 (d, *J* = 8.0, 1H), 7.58 (td, *J* = 8.0, 1.0, 1H), 7.36 (td, *J* = 8.0, 1.0, 1H), 7.29 (d, *J* = 8.0, 1H), 7.16 (d, *J* = 8.0, 1H), 7.08 (m, 1H), 7.00 (d, *J* = 16.0, 1H), 6.85 (dd, *J* = 8.0, 1.0, 1H), 3.84 (s, 3H). <sup>1</sup>H NMR was in agreement with that reported.<sup>5)</sup>

5) Noda, M. *Chem. Pharm. Bull.* **1998**, *46*, 1157.

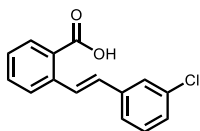

**(E)-2-(3-Chlorostyryl)benzoic Acid (1j):** Typical procedure A using methyl *o*-iodobenzoate (1.00 g, 3.81 mmol), *m*-chlorostyrene (760 mg, 5.50 mmol), PPh<sub>3</sub> (82 mg, 0.32 mmol), Pd(OAc)<sub>2</sub> (33 mg, 0.14 mmol), and Et<sub>3</sub>N (1.0 mL, 7.5 mmol) gave (*E*)-2-(*m*-chlorostyryl)benzoate (340 mg, 1.23 mmol, 30%) as colorless solid. The ester was hydrolyzed using EtOH (5 mL) and 6 M KOH (1.0 mL, 6.0 mmol) gave the title compound (300 mg, 93%) as colorless solid of mp 144.5–146.5 °C: <sup>1</sup>H NMR (CDCl<sub>3</sub>, 400 MHz): 8.07 (d, *J* = 8.0, 1H), 8.04 (d, *J* = 16.0, 1H), 7.71 (d, *J* = 8.0, 1H), 7.57 (t, *J* = 8.0, 1H), 7.51 (m, 1H), 7.45–7.36 (m, 2H), 7.31–7.23 (m, 2H), 6.94 (d, *J* = 16.0, 1H). <sup>1</sup>H NMR was in agreement with that reported.<sup>3)</sup>

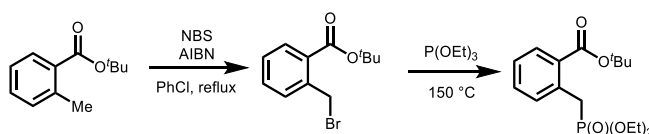

**tert-Butyl 2-[(diethoxyphosphoryl)methyl]benzoate (S4):** To a solution of *tert*-butyl *o*-methylbenzoate (1.17 g, 7.80 mmol) and *N*-bromosuccinimide (1.45 g, 8.20 mmol) in PhCl (20 mL) was added AIBN (64 mg, 0.40 mmol) at rt. The mixture was heated under reflux for 2 h, cooled to rt, and filtered through silica pad (hexane/EtOAc 20:1). The filtrate was concentrated under reduced pressure to give *tert*-butyl *o*-(bromomethyl)benzoate as a yellow oil. A mixture of the ester (1.59 g, 6.94 mmol) and triethyl phosphite (7.0 mL, 40 mmol) was stirred at 150 °C for 3 h, cooled to rt, and concentrated under reduced pressure. The crude mixture was purified by column chromatography (EtOAc) to afford the title compound as a yellow oil (1.42 g, 72%): <sup>1</sup>H NMR (CDCl<sub>3</sub>, 400 MHz): 7.86 (d, *J* = 8.0, 1H), 7.44–7.38 (m, 2H), 7.29 (t, *J* = 8.0, 1H), 4.00 (m, 4H), 3.80 (d, *J* = 23.0, 2H), 1.61 (s, 9H), 1.22 (t, *J* = 7.0, 6H). <sup>1</sup>H NMR was in agreement with that reported.<sup>6)</sup> This compound was used next reaction without further purification.

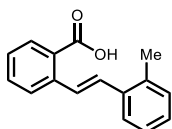

**Typical Procedure B. (E)-2-(2-Methylstyryl)benzoic Acid (1k):** To a mixture of phosphonate S4 (2.00 g, 7.02 mmol) in THF (50 mL) was added NaH (60 % in oil, 0.56 g, 14 mmol) at 0 °C. After 30 min, *o*-tolaldehyde (750 mg, 4.67 mmol) was added to the mixture at 0 °C. The mixture was heated at 70 °C with continuous stirring for 11 h. After cooled to rt, sat NH<sub>4</sub>Cl aq was added. The whole was extracted with EtOAc (30 mL × 2). The combined organic layers were washed with brine, dried over Na<sub>2</sub>SO<sub>4</sub>, and concentrated under reduced pressure. The residue was purified by column chromatography (hexane/EtOAc 20:1) to give *tert*-butyl (*E*)-2-(*o*-methylstyryl)benzoate (1.12 g, 4.20 mmol, 90%) as colorless oil. A mixture of the ester (1.12 g, 4.20 mmol), EtOH (20 mL), and 6 M KOH aq (7.0 mL, 42 mmol) was stirred at rt for 48 h. The mixture was diluted with water (20 mL), and washed with CH<sub>2</sub>Cl<sub>2</sub>. The organic layer was discarded, and the aqueous layers were acidified with 1 M HCl aq and extracted with CH<sub>2</sub>Cl<sub>2</sub> (20 mL × 2). The combined organic layers were washed with brine, dried over Na<sub>2</sub>SO<sub>4</sub>, and concentrated under reduced pressure. The resulting solids were recrystallized from hexane/EtOAc to give the title compound (580 mg, 57 %) as a colorless powder of mp 173.0–175.2 °C: <sup>1</sup>H NMR (CDCl<sub>3</sub>, 400 MHz): 8.09 (dd, *J* = 8.0, 1.0, 1H), 7.93 (d, *J* = 16.0, 1H), 7.74 (d, *J* = 8.0, 1H), 7.67 (m, 1H), 7.59 (td, *J* = 8.0, 1.0, 1H), 7.31 (td, *J* = 8.0,

6) Baird, L. J.; Colombaro, C.; Turner, P. H.; Teesdale-Spittle, J. E.; Harvey, J. E. *Org. Biomol. Chem.*, **2011**, *9*, 4432.

## Supporting Information I

1.0, 1H), 7.20–7.18 (m, 4H), 2.45 (s, 3H). <sup>1</sup>H NMR was in agreement with that reported.<sup>3)</sup>

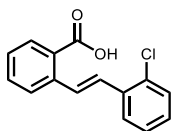

**(E)-2-(2-Chlorostyryl)benzoic Acid (1l):** Typical procedure A using methyl *o*-iodobenzoate (900 mg, 3.43 mmol), *o*-chlorostyrene (730 mg, 5.28 mmol), PPh<sub>3</sub> (82 mg, 0.32 mmol), Pd(OAc)<sub>2</sub> (33 mg, 0.14 mmol), and Et<sub>3</sub>N (1.0 mL, 7.5 mmol) gave (*E*)-2-(*o*-chlorostyryl)benzoate (760 mg, 2.79 mmol, 81%) as yellow oil. The ester was hydrolyzed using EtOH (10 mL) and 9 M KOH (2.0 mL, 18 mmol) to give the title compound (390 mg, 50%) as colorless solid of mp 176.2–176.9 °C: <sup>1</sup>H NMR (CDCl<sub>3</sub>, 400 MHz): 8.13 (d, *J* = 7.5, 1H), 8.06 (d, *J* = 16.5, 1H), 7.79 (t, *J* = 8.5, 2H), 7.62 (t, *J* = 7.5, 1H), 7.45–7.39 (m, 3H), 7.31–7.20 (m, 2H). <sup>1</sup>H NMR was in agreement with that reported.<sup>3)</sup>

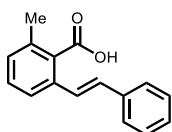

**(E)-2-Methyl-6-styrylbenzoic Acid (1m):** Typical procedure A using methyl 2-bromo-6-methylbenzoate (450 mg, 2.00 mmol), styrene (270 mg, 2.59 mmol), PPh<sub>3</sub> (37 mg, 0.14 mmol), Pd(OAc)<sub>2</sub> (16 mg, 70 μmol), and Et<sub>3</sub>N (5.0 mL, 38 mmol) gave (*E*)-2-methyl-6-styrylbenzoate (250 mg, 50%) as colorless oil. The ester was hydrolyzed using DMSO (5.0 mL) and 5 M KOH (1.0 mL, 5.0 mmol) to give the title compound (220 mg, 91%) as colorless solid of mp 102.2–103.6 °C: <sup>1</sup>H NMR (CDCl<sub>3</sub>, 400 MHz): 7.55 (d, *J* = 8.0, 1H), 7.49 (d, *J* = 8.0, 2H), 7.36–7.32 (m, 4H), 7.27 (d, *J* = 8.0, 1H), 7.16 (d, *J* = 8.0, 1H), 7.08 (d, *J* = 16.0, 1H), 2.44 (s, 3H). <sup>13</sup>C NMR (CDCl<sub>3</sub>, 100 MHz): 175.5 (C), 137.1 (C), 135.9 (C), 135.7 (C), 131.8 (CH), 131.8 (C), 130.2 (CH), 129.6 (CH), 128.7 (CH), 128.0 (CH), 126.8 (CH), 125.8 (CH), 123.4 (CH), 20.2 (CH<sub>3</sub>). **MS** (ESI) *m/z*: 237 (M – H). **HRMS** (ESI) *m/z*: [M – H]<sup>–</sup> calcd for C<sub>16</sub>H<sub>13</sub>O<sub>2</sub>, 237.0916; found, 237.0913. **IR** (NaCl): 3030, 2905, 2340, 1695, 1580, 1382, 1286, 1130, 960.

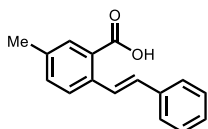

**(E)-5-Methyl-2-styrylbenzoic Acid (1n):** Typical procedure A using methyl 2-bromo-5-methylbenzoate (1.00 g, 4.65 mmol), styrene (630 mg, 6.05 mmol), PPh<sub>3</sub> (120 mg, 0.458 mmol), Pd(OAc)<sub>2</sub> (50 mg, 0.23 mmol), and Et<sub>3</sub>N (5.0 mL, 38 mmol) gave (*E*)-5-methyl-2-styrylbenzoate (740 mg, 63%) as colorless oil. The ester was hydrolyzed using EtOH (5.0 mL) and 5 M KOH (1.8 mL, 9.0 mmol) gave the title compound (400 mg, 57%) as colorless solid of mp 149.7–151.5 °C: <sup>1</sup>H NMR (CDCl<sub>3</sub>, 400 MHz): 8.02 (d, *J* = 16.0, 1H), 7.89 (s, 1H), 7.65 (d, *J* = 8.0, 1H), 7.54 (d, *J* = 8.0, 2H), 7.39–7.34 (m, 3H), 7.28 (d, *J* = 8.0, 1H), 7.00 (d, *J* = 16.0, 1H), 2.41 (s, 3H). <sup>13</sup>C NMR (CDCl<sub>3</sub>, 100 MHz): 173.5 (C), 137.5 (C), 137.4 (C), 137.2 (C), 134.0 (CH), 132. (CH), 131.0 (CH), 128.7 (CH), 127.7 (CH), 127.4 (CH), 127.2 (CH), 127.1 (C), 126.8 (CH), 21.0 (CH<sub>3</sub>). **MS** (ESI) *m/z*: 237 (M – H). **HRMS** (ESI) *m/z*: [M – H]<sup>–</sup> calcd for C<sub>15</sub>H<sub>10</sub>O<sub>2</sub>Cl, 257.0369; found, 257.0363. **IR** (NaCl): 3030, 2916, 2360, 2341, 1680, 1490, 1350, 1277, 1248, 966, 750.

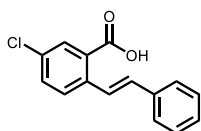

**(E)-5-chloro-2-styrylbenzoic acid (1o):** Typical procedure A using *tert*-butyl 2-bromo-5-chlorobenzoate (698 mg, 2.40

## Supporting Information I

mmol), styrene (324 mg, 3.12 mmol), PPh<sub>3</sub> (26 mg, 96 μmol), Pd(OAc)<sub>2</sub> (11 mg, 48 μmol), and Et<sub>3</sub>N (5.0 mL, 38 mmol) gave *tert*-butyl (*E*)-5-chloro-2-styrylbenzoate (330 mg, 69%) as colorless oil. The ester was hydrolyzed using DMSO (5.0 mL) and 5 M KOH (1.1 mL, 5.0 mmol) to give the title compound (20 mg, 69%) as colorless solid of mp 147.0–147.5 °C: <sup>1</sup>H NMR (CDCl<sub>3</sub>, 400 MHz): 8.02 (d, *J* = 7.5, 1H), 7.98 (d, *J* = 16.0, 1H), 7.68 (d, *J* = 8.0, 1H), 7.53–7.52 (m, 3H), 7.35 (t, *J* = 8.0, 2H), 7.28 (d, *J* = 8.0, 1H), 7.00 (d, *J* = 16.0, 1H). <sup>13</sup>C NMR (CDCl<sub>3</sub>, 100 MHz): 172.0 (C), 138.6 (C), 136.9 (C), 133.1 (CH), 133.0 (C), 132.4 (CH), 131.4 (CH), 128.7 (CH), 128.6 (CH), 128.4 (C), 128.1 (CH), 126.9 (CH), 126.2 (CH). MS (ESI) *m/z*: 257 (M – H), 259 (M + 2 – H). HRMS (ESI) *m/z*: [M – H]<sup>–</sup> calcd for C<sub>15</sub>H<sub>10</sub>O<sub>2</sub>Cl, 257.0369; found, 257.0363. IR (NaCl): 3050, 2917, 2360, 2341, 1693, 1477, 1411, 1296, 1240, 1112, 964.

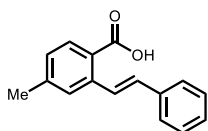

**(*E*)-4-Methyl-2-styrylbenzoic acid (1p)**: Typical procedure A using methyl 2-bromo-4-methylbenzoate (400 mg, 1.75 mmol), styrene (240 mg, 2.28 mmol), PPh<sub>3</sub> (46 mg, 0.17 mmol), Pd(OAc)<sub>2</sub> (20 mg, 88 μmol), and Et<sub>3</sub>N (5.0 mL, 38 mmol) gave (*E*)-4-methyl-2-styrylbenzoate (570 mg, quantity) as colorless oil. The ester was hydrolyzed using EtOH (10 mL) and 5 M KOH (1.0 mL, 5.0 mmol) to give the title compound (140 mg, 32%) as colorless solid of mp 188.7–190.1 °C: <sup>1</sup>H NMR (CDCl<sub>3</sub>, 400 MHz): 8.06 (d, *J* = 16.0, 1H), 7.98 (d, *J* = 8.0, 1H), 7.56–7.54 (m, 3H), 7.36 (t, *J* = 7.5, 2H), 7.28 (d, *J* = 7.5, 1H), 7.17 (d, *J* = 8.0, 1H), 7.01 (d, *J* = 16.0, 1H), 2.45 (s, 3H). <sup>13</sup>C NMR (*d*-acetone, 100 MHz): 167.8 (C), 142.5 (C), 139.1 (C), 137.8 (C), 131.0 (CH), 130.6 (CH), 128.6 (CH), 127.9 (CH), 127.6 (CH), 127.2 (CH), 126.67 (CH), 126.66 (CH), 126.2 (C), 20.5 (CH<sub>3</sub>). MS (ESI) *m/z*: 237 (M – H). HRMS (ESI) *m/z*: [M – H]<sup>–</sup> calcd for C<sub>16</sub>H<sub>13</sub>O<sub>2</sub>, 237.0916; found, 237.0909. IR (NaCl): 2916, 2848, 2360, 2341, 1673, 1301, 1241, 944.

---

5. Enantioselective Bromolactonization of **1**.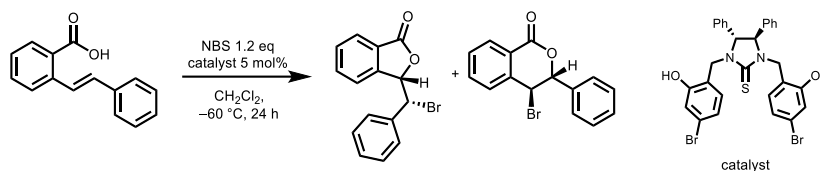

**Typical Procedure.** (*S*)-3-[(*R*)-Bromo(phenyl)methyl]isobenzofuran-1(3*H*)-one (**2a**) and (3*R*,4*S*)-4-Bromo-3,4-dihydro-3-phenylisochromen-1-one (**3a**): Carboxylic acid **1a** (21.4 mg, 0.100 mmol) and catalyst **4i** (3.0 mg, 50  $\mu$ mmol) were placed in a 10-mL tube and dissolved in CH<sub>2</sub>Cl<sub>2</sub> (2.0 mL), and the mixture was cooled at –60 °C. After 10 min, *N*-bromosuccinimide (21.2 mg, 0.120 mmol) was added, and the mixture was stirred at –60 °C for 72 h. 2-Methyl-2-butene (0.1 mL) and sat Na<sub>2</sub>S<sub>2</sub>O<sub>3</sub> were added to the mixture at a 10 min interval, and the mixture was warmed to rt. The whole was extracted with CH<sub>2</sub>Cl<sub>2</sub> (2 mL  $\times$  3). The combined organic layers were dried over Na<sub>2</sub>SO<sub>4</sub> and concentrated under reduced pressure. The ratio of **2a** and **3a** was determined to be 8:1 on the basis of the integral area of <sup>1</sup>H NMR signals at 5.23 and 5.59 ppm in the crude mixture. The crude mixture was purified by column chromatography (hexane/EtOAc 5:1) to give an 8:1 mixture of **2a** and **3a** (28.0 mg, 90%) as a colorless solid. The isomers were separated by additional column chromatography (hexane/EtOAc 10:1) for characterization.

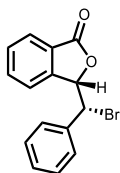

**2a**: Colorless solid of mp 121.1–122.0 °C. [ $\alpha$ ]<sub>D</sub><sup>20</sup> –21.2 (*c* 0.782, CHCl<sub>3</sub>) for 92:8 er; lit: [ $\alpha$ ]<sub>D</sub><sup>20</sup> –5.8 (*c* 0.35, CHCl<sub>3</sub>) for 57:43 er.<sup>7)</sup> <sup>1</sup>H NMR (CDCl<sub>3</sub>, 400 MHz): 7.84 (d, *J* = 7.5, 1H), 7.67–7.52 (m, 3H), 7.40 (m, 2H), 7.34–7.28 (m, 3H), 5.94 (d, *J* = 6.0, 1H), 5.23 (d, *J* = 6.0, 1H). <sup>1</sup>H NMR was in agreement with that reported.<sup>7)</sup> The enantiomer ratio (er) was determined by HPLC (Daicel Chiralpak IC-3, *i*-PrOH/hexane 1:2, 0.6 mL/min, 220 nm, 40 °C, retention time = 19.3 min (3*R*, $\alpha$ *S*) and 22.1 min (3*S*, $\alpha$ *R*)).

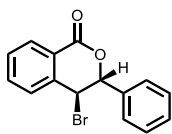

**3a**: Colorless oil. [ $\alpha$ ]<sub>D</sub><sup>20</sup> +2.34 (*c* 0.211, CHCl<sub>3</sub>) for 56:44 er; lit: [ $\alpha$ ]<sub>D</sub><sup>26</sup> –70.2 (*c* 1.0, CHCl<sub>3</sub>) for the other enantiomer with 92% ee.<sup>3)</sup> <sup>1</sup>H NMR (CDCl<sub>3</sub>, 400 MHz): 8.18 (d, *J* = 7.5, 1H), 7.62 (m, 1H), 7.52–7.49 (m, 2H), 7.37–7.29 (m, 5H), 5.94 (d, *J* = 4.5, 1H), 5.59 (d, *J* = 4.5, 1H). <sup>1</sup>H NMR was in agreement with that reported.<sup>3)</sup> The er was determined by HPLC (Daicel Chiralcel OJ, *i*-PrOH/hexane 1:4, 1.0 mL/min, 220 nm, 40 °C, retention time = 18.4 min (3*R*,4*S*) and 19.8 min (3*S*,4*R*)).

(*S*)-3-[(*R*)-Bromo(4-methylphenyl)methyl]isobenzofuran-1(3*H*)-one (**2b**) and (3*R*,4*S*)-4-Bromo-3-(4-methylphenyl)-3,4-dihydroisochromen-1-one (**3b**): The typical procedure using **1b** (24.0 mg, 0.100 mmol) gave a 5:2 mixture of **2b** and **3b** (29.8 mg, 93%) as a colorless oil. The ratio of **2b** and **3b** was determined on the basis of the integral area of <sup>1</sup>H NMR signals at 5.20 and 5.54 ppm in the crude mixture. The isomers were separated by column chromatography (hexane/EtOAc

7) Armstrong, A.; Braddock, D. C.; Jones, A. X.; Clark, S. *Tetrahedron Lett.* **2013**, *54*, 7004.

## Supporting Information I

10:1) for characterization.

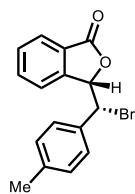

**2b**: Colorless solid of mp 161.0–161.9 °C.  $[\alpha]_{\text{D}}^{24} -16.0$  ( $c$  1.50,  $\text{CHCl}_3$ ) for 94:6 er.  **$^1\text{H NMR}$**  ( $\text{CDCl}_3$ , 400 MHz): 7.83 (d,  $J$  = 7.5, 1H), 7.67–7.60 (m, 2H), 7.54 (t,  $J$  = 7.5, 1H), 7.29 (d,  $J$  = 8.0, 2H), 7.12 (d,  $J$  = 8.0, 2H), 5.93 (d,  $J$  = 6.0, 1H), 5.20 (d,  $J$  = 6.0, 1H), 2.32 (s, 3H).  **$^{13}\text{C NMR}$**  ( $\text{CDCl}_3$ , 100 MHz): 169.3 (C), 146.4 (C), 139.0 (C), 133.8 (CH), 133.0 (C), 129.9 (CH), 129.3 (CH), 128.4 (CH), 126.7 (C), 125.8 (CH), 123.8 (CH), 82.6 (CH), 53.5 (CH), 21.2 ( $\text{CH}_3$ ). **MS** (ESI)  $m/z$ : 317 ( $\text{M} + \text{H}$ ), 319 ( $\text{M} + 2 + \text{H}$ ). **HRMS** (ESI)  $m/z$ :  $[\text{M} + \text{H}]^+$  calcd for  $\text{C}_{16}\text{H}_{14}\text{O}_2\text{Br}$ , 317.0177; found, 317.0179. **IR** (NaCl): 3050, 2940, 2846, 1766, 1609, 1513, 1294, 1047, 749, 636. The er was determined by HPLC (Daicel Chiralpak AD-H, *i*-PrOH/hexane 1:11, 0.6 mL/min, 220 nm, 40 °C, retention time = 16.0 min ( $3R,\alpha S$ ) and 17.4 min ( $3S,\alpha R$ )). The Absolute stereochemistry was determined ( $3S,\alpha R$ ) by X-ray crystallography analysis, for which suitable single crystal was obtained by slow evaporation of a solution in hexane/EtOAc. The crystal data of **3b** are as follows; space group,  $P4_3$ ;  $a$  = 8.67730 (1),  $b$  = 8.67730 (1),  $c$  = 17.8920 (5);  $V$  = 1347.19,  $Z$  = 4,  $D_x$  = 1.564.<sup>8)</sup>

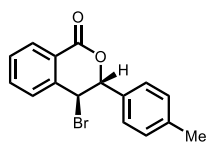

**3b**: Colorless oil.  $[\alpha]_{\text{D}}^{24} +2.32$  ( $c$  0.525,  $\text{CHCl}_3$ ) for 52:48 er; lit:  $[\alpha]_{\text{D}}^{28} -73.4$  ( $c$  1.0,  $\text{CHCl}_3$ ) for the other enantiomer with 83% ee.<sup>3)</sup>  **$^1\text{H NMR}$**  ( $\text{CDCl}_3$ , 400 MHz): 8.15 (dd,  $J$  = 7.5, 1.0, 1H), 7.59 (td,  $J$  = 7.5, 1.0, 1H), 7.49–7.45 (m, 2H), 7.16–7.11 (m, 4H), 5.88 (d,  $J$  = 4.5, 1H), 5.54 (d,  $J$  = 4.5, 1H), 2.30 (s, 3H).  $^1\text{H NMR}$  was in agreement with that reported.<sup>3)</sup> The er was determined by HPLC (Daicel Chiralpak IC-3, *i*-PrOH/hexane 1:9, 0.6 mL/min, 220 nm, 40 °C, retention time = 17.5 min ( $3R,4S$ ) and 20.0 min ( $3S,4R$ )).

**(S)-3-[(R)-Bromo(4-tert-butylphenyl)methyl]isobenzofuran-1(3H)-one (2c) and (3R,4S)-4-Bromo-3-(4-tert-butylphenyl)-3,4-dihydroisochromen-1-one (3c)**: The typical procedure using **1c** (28.0 mg, 0.100 mmol) gave a 1:1 mixture of **2c** and **3c** (33.1 mg, 92%) as a colorless oil. The ratio of **2c** and **3c** was determined on the basis of the integral area of  $^1\text{H NMR}$  signals at 5.18 and 5.54 ppm in the crude mixture. The isomers were separated by column chromatography (hexane/EtOAc 10:1) for characterization.

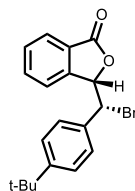

**2c**: Colorless solid of mp 117.3–118.1 °C.  $[\alpha]_{\text{D}}^{24} -14.1$  ( $c$  0.938,  $\text{CHCl}_3$ ) for 91:9 er.  **$^1\text{H NMR}$**  ( $\text{CDCl}_3$ , 400 MHz): 7.84 (d,  $J$  = 7.5, 1H), 7.65–7.64 (m, 2H), 7.54 (m, 1H), 7.34 (m, 4H), 5.92 (d,  $J$  = 7.0, 1H), 5.18 (d,  $J$  = 7.0, 1H), 1.29 (s, 9H).  **$^{13}\text{C}$**

<sup>8</sup> CCDC 2189245 contains the supplementary crystallographic data for this paper. These data can be obtained free of charge from The Cambridge Crystallographic Data Centre via [www.ccdc.cam.ac.uk/structures](http://www.ccdc.cam.ac.uk/structures).



## Supporting Information I

**NMR** (CDCl<sub>3</sub>, 100 MHz): 169.3 (C), 152.1 (C), 146.4 (C), 133.8 (CH), 133.2 (C), 129.9 (CH), 128.2 (CH), 126.7 (C), 125.7 (CH), 125.6 (CH) 124.0 (CH), 82.4 (CH), 53.6 (CH), 34.6 (C), 31.2 (CH<sub>3</sub>). **MS** (ESI) *m/z*: 381 (M + Na), 383 (M + 2 + Na). **HRMS** (ESI) *m/z*: [M + Na]<sup>+</sup> calcd for C<sub>19</sub>H<sub>19</sub>O<sub>2</sub>NaBr, 381.0466; found, 381.0468. **IR** (NaCl): 3026, 2963, 2868, 1770, 1610, 1466, 1360, 1285, 1061, 752. The er was determined by HPLC (Daicel Chiralpak AD-H, *i*-PrOH/hexane 1:29, 0.6 mL/min, 220 nm, 40 °C, retention time = 18.0 min (*3R,αS*) and 19.5 min (*3S,αR*)). The absolute configuration was tentatively assigned by analogy.

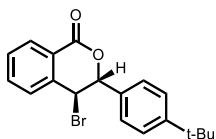

**3c**: Colorless solid of mp 117.4–118.0 °C. [ $\alpha$ ]<sub>D</sub><sup>28</sup> +3.16 (*c* 1.00, CHCl<sub>3</sub>) for 53:47 er. **<sup>1</sup>H NMR** (CDCl<sub>3</sub>, 400 MHz): 8.15 (dd, *J* = 7.5, 1.0, 1H), 7.59 (td, *J* = 7.5, 1.0, 1H), 7.49–7.45 (m, 2H), 7.16–7.11 (m, 4H), 5.88 (d, *J* = 4.5, 1H), 5.54 (d, *J* = 4.5, 1H), 2.30 (s, 3H). **<sup>13</sup>C NMR** (CDCl<sub>3</sub>, 100 MHz): 163.1 (C), 152.0 (C), 137.9 (C), 134.5 (CH), 133.3 (C), 130.3 (CH), 129.8 (CH), 128.4 (CH), 126.1 (CH), 125.7 (CH), 124.2 (C), 84.1 (CH), 46.0 (CH), 34.6 (C), 21.1 (CH<sub>3</sub>). **MS** (ESI) *m/z*: 381 (M + Na), 383 (M + 2 + Na). **HRMS** (ESI) *m/z*: [M + H]<sup>+</sup> calcd for C<sub>19</sub>H<sub>20</sub>O<sub>2</sub>Br, 359.0647; found, 359.0651. **IR** (NaCl): 2963, 2868, 1730, 1460, 1370, 1236, 1110, 1049, 764. The er was determined by HPLC (Daicel Chiralpak AD-H, *i*-PrOH/hexane 1:11, 0.6 mL/min, 254 nm, 40 °C, retention time = 15.4 min (*3R,4S*) and 16.0 min (*3S,4R*)). The absolute configuration was tentatively assigned by analogy.

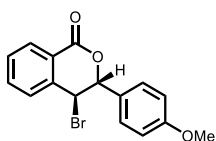

**(3SR,4RS)-4-Bromo-3-(4-methoxyphenyl)-3,4-dihydroisochromen-1-one (3d)**: The typical procedure using **1d** (25.4 mg, 0.100 mmol) gave **3d** (25.8 mg, 77%) as a colorless oil in 50:50 er. **<sup>1</sup>H NMR** (CDCl<sub>3</sub>, 400 MHz): 8.14 (dd, *J* = 7.0, 1.5, 1H), 7.60 (td, *J* = 7.0, 1.5, 1H), 7.50–7.47 (m, 2H), 7.18 (d, *J* = 8.5, 2H), 6.83 (d, *J* = 8.5, 2H), 5.84 (d, *J* = 5.0, 1H), 5.52 (d, *J* = 5.0, 1H), 3.77 (s, 3H). <sup>1</sup>H NMR was in agreement with that reported.<sup>3)</sup>The er was determined by HPLC (Daicel Chiralpak AD-H, *i*-PrOH/hexane 1:5, 0.6 mL/min, 220 nm, 40 °C, retention time = 18 min and 20 min).

**(S)-3-[(R)-Bromo(4-acetoxyphenyl)methyl]isobenzofuran-1(3H)-one (2e) and (3R,4S)-4-Bromo-3-(4-acetoxyphenyl)-3,4-dihydroisochromen-1-one (3e)**: The typical procedure using **1e** (28.0 mg, 0.100 mmol) gave a 1:1 mixture of **2e** and **3e** (30.3 mg, 84% as a colorless oil. The ratio of **2e** and **3e** was determined on the basis of the integral area of <sup>1</sup>H NMR signals at 5.20 and 5.31 ppm in the crude mixture. The isomers were separated by column chromatography (hexane/EtOAc 10:1) for characterization.

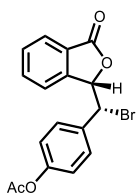

**2e**: Colorless solid of mp 131.1–131.8 °C. [ $\alpha$ ]<sub>D</sub><sup>24</sup> –5.42 (*c* 1.05, CHCl<sub>3</sub>) for 68:32 er. **<sup>1</sup>H NMR** (CDCl<sub>3</sub>, 400 MHz): 7.84 (d, *J* = 7.5, 1H), 7.66–7.62 (m, 2H), 7.54 (t, *J* = 7.5, 1H), 7.41 (*J* = 8.5, 2H), 7.06 (d, *J* = 8.5, 2H), 5.91 (d, *J* = 6.0, 1H), 5.20 (d, *J* = 6.0, 1H), 2.29 (s, 3H). **<sup>13</sup>C NMR** (CDCl<sub>3</sub>, 100 MHz): 169.1 (C), 169.0 (C), 150.9 (C), 146.1 (C), 133.9 (CH), 133.4 (C),

## Supporting Information I

130.0 (CH), 129.7 (CH), 126.7 (C), 125.8 (CH), 123.7 (CH), 121.7 (CH), 82.4 (CH), 52.5 (CH), 21.1 (CH<sub>3</sub>). **MS** (ESI) *m/z*: 383 (M + Na), 385 (M + 2 + Na). **HRMS** (ESI) *m/z*: [M + H]<sup>+</sup> calcd for C<sub>17</sub>H<sub>14</sub>O<sub>4</sub>Br, 361.0075; found, 361.0079. **IR** (NaCl): 3022, 2924, 2851, 1770, 1605, 1507, 1370, 1286, 1205, 1057, 735. The er was determined by **HPLC** (Daicel Chiralpak IC-3, *i*-PrOH/hexane 1:2, 0.6 mL/min, 220 nm, 40 °C, retention time = 34.9 min (*3R,αS*) and 39.6 min (*3S,αR*)). The absolute configuration was tentatively assigned by analogy.

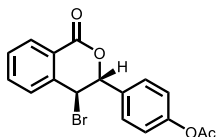

**3e**: Colorless solid of mp 113.8–115.2 °C. [ $\alpha$ ]<sub>D</sub><sup>24</sup> +2.56 (*c* 0.812, CHCl<sub>3</sub>) for 52:48 er; lit: [ $\alpha$ ]<sub>D</sub><sup>25</sup> –58.6 (*c* 1.0, CHCl<sub>3</sub>) for the other enantiomer with 80% ee.<sup>3)</sup> **<sup>1</sup>H NMR** (CDCl<sub>3</sub>, 400 MHz): 8.15 (d, *J* = 8.0, 1H), 7.62 (t, *J* = 7.0, 1H), 7.52–7.47 (m, 2H), 7.29 (d, *J* = 8.0, 2H), 7.07 (d, *J* = 8.0, 2H), 5.90 (d, *J* = 4.0, 1H), 5.31 (d, *J* = 4.0, 1H), 2.23 (s, 3H). **<sup>1</sup>H NMR** was in agreement with that reported.<sup>3)</sup> The er was determined by HPLC (Daicel Chiralpak AD-H, *i*-PrOH/hexane 1:5, 0.6 mL/min, 254 nm, 40 °C, retention time = 22.2 min (*3R,4S*) and 29.6 min (*3S,4R*)).

**(S)-3-[(R)-Bromo(4-chlorophenyl)methyl]isobenzofuran-1(3H)-one (2f) and (3R,4S)-4-Bromo-3-(4-chlorophenyl)-3,4-dihydroisochromen-1-one (3f)**: The typical procedure using **1f** (26.0 mg, 0.100 mmol) and the reaction for 120 h gave a 7:2 mixture of **2f** and **3f** (30.0 mg, 90%) as a colorless oil. The ratio of **2f** and **3f** was determined on the basis of the integral area of **<sup>1</sup>H NMR** signals at 5.15 and 5.50 ppm in the crude mixture. The isomers were separated by column chromatography (hexane/EtOAc 10:1) for characterization.

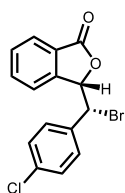

**2f**: Colorless solid of mp 137.2–138.5 °C. [ $\alpha$ ]<sub>D</sub><sup>24</sup> –12.9 (*c* 0.700, CHCl<sub>3</sub>) for 85:15 er. **<sup>1</sup>H NMR** (CDCl<sub>3</sub>, 400 MHz): 7.85 (d, *J* = 7.5, 1H), 7.67–7.64 (m, 2H), 7.54 (t, *J* = 7.5, 1H), 7.34 (d, *J* = 8.0, 2H), 7.28 (d, *J* = 8.0, 2H), 5.93 (d, *J* = 6.0, 1H), 5.15 (d, *J* = 6.0, 1H). **<sup>13</sup>C NMR** (CDCl<sub>3</sub>, 100 MHz): 169.0 (C), 146.0 (C), 134.9 (C), 134.5 (C), 134.0 (CH), 130.1 (CH), 129.9 (CH), 128.8 (CH), 126.5 (C), 125.9 (CH), 123.6 (CH), 82.3 (CH), 52.1 (CH). **MS** (ESI) *m/z*: 337 (M + H), 339 (M + 2 + H), 341 (M + 4 + H). **HRMS** (ESI) *m/z*: [M + H]<sup>+</sup> calcd for C<sub>15</sub>H<sub>11</sub>O<sub>2</sub>ClBr, 336.9631; found, 336.9643. **IR** (NaCl): 2913, 2852, 1758, 1592, 1491, 1289, 1210, 1052, 754. The er was determined by HPLC (Daicel Chiralpak AD-H, *i*-PrOH/hexane 1:11, 0.6 mL/min, 220 nm, 40 °C, retention time = 21.8 min (*3R,αS*) and 24.5 min (*3S,αR*)). The absolute configuration was tentatively assigned by analogy.

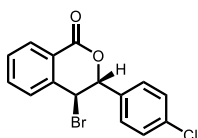

**3f**: Colorless solid of mp 130.5–131.5 °C. [ $\alpha$ ]<sub>D</sub><sup>24</sup> +2.44 (*c* 0.531, CHCl<sub>3</sub>) for 51:49 er; lit: [ $\alpha$ ]<sub>D</sub><sup>25</sup> –51.0 (*c* 1.0, CHCl<sub>3</sub>) for the other enantiomer with 95% ee.<sup>3)</sup> **<sup>1</sup>H NMR** (CDCl<sub>3</sub>, 400 MHz): 8.15 (dd, *J* = 8.0, 1.5, 1H), 7.62 (ddd, *J* = 8.0, 7.5, 1.5, 1H), 7.51–7.48 (m, 2H), 7.32–7.30 (m, 2H), 7.26–7.23 (m, 2H), 5.84 (d, *J* = 5.0, 1H), 5.50 (d, *J* = 5.0, 1H). **<sup>1</sup>H NMR** was in agreement with that reported.<sup>3)</sup> The er was determined by HPLC (Daicel Chiralpak IC-3, *i*-PrOH/hexane 1:9, 0.6 mL/min,

## Supporting Information I

220 nm, 40 °C, retention time = 22.0 min (3*R*,4*S*) and 25.5 min (3*S*,4*R*)).

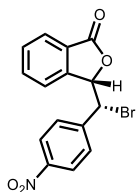

**(S)-3-[(R)-Bromo(4-nitrophenyl)methyl]isobenzofuran-1(3*H*)-one (2g):** The typical procedure using **1g** (25.0 mg, 0.100 mmol) gave a crude product including a trace amount of **2g**. <sup>1</sup>H NMR (CDCl<sub>3</sub>, 400 MHz): 8.17 (d, *J* = 7.0, 2H), 7.84 (d, *J* = 7.0, 1H), 7.77–7.70 (m, 2H), 7.60–7.56 (m, 3H), 5.99 (d, *J* = 6.5, 1H), 5.19 (d, *J* = 6.5, 1H). <sup>1</sup>H NMR was in agreement with that reported.<sup>9)</sup> The er was not determined. The absolute configuration was tentatively assigned by analogy.

**(S)-3-[(R)-Bromo(3-methylphenyl)-methyl]isobenzofuran-1(3*H*)-one (2h) and (3*R*,4*S*)-4-Bromo-3-(3-methylphenyl)-3,4-dihydroisochromen-1-one (3h):** The typical procedure using **1h** (24.0 mg, 0.100 mmol) and the reaction for 120 h gave a 6:1 mixture of **2h** and **3h** (27.5 mg, 88%) as a colorless oil. The ratio of **2h** and **3h** was determined on the basis of the integral area of <sup>1</sup>H NMR signals at 5.15 and 5.85 ppm in the crude mixture. The isomers were separated by column chromatography (hexane/EtOAc 10:1) for characterization.

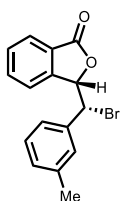

**2h:** Colorless solid of mp 118.9–119.5 °C. [ $\alpha$ ]<sub>D</sub><sup>24</sup> –21.3 (*c* 0.372, CHCl<sub>3</sub>) for 93:7 er. <sup>1</sup>H NMR (CDCl<sub>3</sub>, 400 MHz): 7.85 (d, *J* = 8.0, 1H), 7.68–7.62 (m, 2H), 7.54 (td, *J* = 8.0, 1.0, 1H), 7.24–7.21 (m, 3H), 7.11 (m, 1H), 5.93 (d, *J* = 6.5, 1H), 5.15 (d, *J* = 6.5, 1H), 2.34 (s, 3H). <sup>13</sup>C NMR (CDCl<sub>3</sub>, 100 MHz): 169.3 (C), 146.2 (C), 138.4 (C), 136.0 (C), 133.8 (CH), 129.9 (CH), 129.8 (CH), 129.1 (CH), 128.5 (CH), 126.7 (C), 125.7 (CH), 125.6 (CH), 123.9 (CH), 82.4 (CH), 53.5 (CH), 21.3 (CH<sub>3</sub>). **MS** (ESI) *m/z*: 317 (M + H), 319 (M + 2 + H). **HRMS** (ESI) *m/z*: [M + H]<sup>+</sup> calcd for C<sub>16</sub>H<sub>14</sub>O<sub>2</sub>Br, 317.0177; found, 317.0166. **IR** (NaCl): 2913, 2869, 1783, 1592, 1462, 1289, 1215, 1047, 985, 709. The er was determined by HPLC (Daicel Chiralpak AD-H, *i*-PrOH/hexane 1:11, 0.6 mL/min, 220 nm, 40 °C, retention time = 13.9 min (3*R*, $\alpha$ *S*) and 16.0 min (3*S*, $\alpha$ *R*)). The absolute configuration was tentatively assigned by analogy.

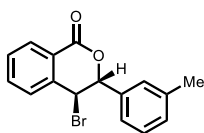

**3h:** Colorless oil. [ $\alpha$ ]<sub>D</sub><sup>24</sup> +2.28 (*c* 0.803, CHCl<sub>3</sub>) for 60:40 er; lit: [ $\alpha$ ]<sub>D</sub><sup>27</sup> –71.2 (*c* 1.0, CHCl<sub>3</sub>) for the other enantiomer with 90% ee.<sup>3)</sup> <sup>1</sup>H NMR (CDCl<sub>3</sub>, 400 MHz): 8.15 (d, *J* = 7.0, 1H), 7.59 (t, *J* = 7.5, 1H), 7.48 (t, *J* = 7.0, 2H), 7.19 (t, *J* = 7.5, 1H), 7.12–7.10 (m, 2H), 7.04 (d, *J* = 7.5, 1H), 5.88 (d, *J* = 4.5, 1H), 5.57 (d, *J* = 4.5, 1H), 2.31 (s, 3H). <sup>1</sup>H NMR was in agreement with that reported.<sup>3)</sup> The er was determined by HPLC (Daicel Chiralpak IC-3, *i*-PrOH/hexane 1:5, 0.6 mL/min, 220 nm, 40 °C, retention time = 22.2 min (3*S*,4*R*) and 24.1 min (3*R*,4*S*)).

9) Tsuchihashi, A.; Shirakawa, S. *Synlett*, **2019**, 30, 1662.

## Supporting Information I

(*S*)-3-[(*R*)-Bromo(3-methoxyphenyl)methyl]isobenzofuran-1(3*H*)-one (**2i**) and (3*R*,4*S*)-4-Bromo-3-(3-methoxyphenyl)-3,4-dihydroisochromen-1-one (**3i**): The typical procedure using **1i** (26.0 mg, 0.100 mmol) gave a 7:2 mixture of **2i** and **3i** (23.5 mg, 71%) as a colorless oil. The ratio of **2i** and **3i** was determined on the basis of the integral area of <sup>1</sup>H NMR signals at 5.19 and 5.54 ppm in the crude mixture. The isomers were separated by preparative TLC (hexane/EtOAc 3:1) for characterization.

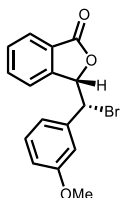

**2i**: Colorless solid of mp 83.6–84.7 °C.  $[\alpha]_D^{24} -4.89$  (*c* 0.564, CHCl<sub>3</sub>) for 87:12 er. <sup>1</sup>H NMR (CDCl<sub>3</sub>, 400 MHz): 7.84 (d, *J* = 8.0, 1H), 7.66–7.51 (m, 3H), 7.22 (t, *J* = 8.0, 1H), 6.97–6.95 (m, 2H), 6.83 (m, 1H), 5.92 (d, *J* = 6.0, 1H), 5.19 (d, *J* = 6.0, 1H), 3.79 (s, 3H). <sup>13</sup>C NMR (CDCl<sub>3</sub>, 100 MHz): 169.2 (C), 159.6 (C), 146.2 (C), 137.2 (C), 133.8 (CH), 129.9 (CH), 129.6 (CH), 126.7 (C), 125.7 (CH), 123.7 (CH), 120.7 (CH), 114.7 (CH), 114.2 (CH), 82.4 (CH), 55.3 (CH), 52.3 (CH<sub>3</sub>). **MS** (ESI) *m/z*: 355 (M + Na), 357 (M + 2 + Na). **HRMS** (ESI) *m/z*: [M + Na]<sup>+</sup> calcd for C<sub>16</sub>H<sub>13</sub>O<sub>3</sub>NaBr, 354.9946; found, 354.9958. **IR** (NaCl): 3014, 2937, 2836, 1770, 1600, 1285, 1267, 1051, 756. The er was determined by HPLC (Daicel Chiralpak AD-H, *i*-PrOH/hexane 1:11, 0.6 mL/min, 220 nm, 40 °C, retention time = 22.2 min (3*R*,*αS*) and 24.2 min (3*S*,*αR*)). The absolute configuration was tentatively assigned by analogy.

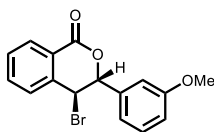

**3i**: Colorless solid of mp 92.2–93.5 °C.  $[\alpha]_D^{28} +1.74$  (*c* 0.241, CHCl<sub>3</sub>) for 60:40 er. <sup>1</sup>H NMR (CDCl<sub>3</sub>, 400 MHz): 8.14 (d, *J* = 6.5, 1H), 7.60 (td, *J* = 7.5, 1.0, 1H), 7.50–7.45 (m, 2H), 7.23 (t, *J* = 7.5, 1H), 6.84–6.79 (m, 3H), 5.88 (d, *J* = 4.0, 1H), 5.54 (d, *J* = 4.0, 1H), 3.75 (s, 3H). <sup>13</sup>C NMR (CDCl<sub>3</sub>, 100 MHz): 163.0 (C), 159.8 (C), 137.8 (C), 137.7 (C), 134.5 (CH), 130.4 (CH), 129.9 (CH), 129.8 (CH), 128.3 (CH), 124.1 (C), 118.6 (CH), 114.2 (CH), 112.3 (CH), 83.9 (CH), 55.2 (CH), 45.9 (CH<sub>3</sub>). **MS** (ESI) *m/z*: 355 (M + Na), 357 (M + 2 + Na). **HRMS** (ESI) *m/z*: [M + K]<sup>+</sup> calcd for C<sub>16</sub>H<sub>13</sub>O<sub>3</sub>KBr, 370.9685; found, 370.9686. **IR** (NaCl): 3010, 2932, 2836, 1731, 1600, 1286, 1267, 1046, 755. The er was determined by HPLC (Daicel Chiralpak IC-3, *i*-PrOH/hexane 1:2, 0.6 mL/min, 254 nm, 40 °C, retention time = 17.6 min (3*R*,4*S*) and 19.4 min (3*S*,4*R*)). The absolute configuration was tentatively assigned by analogy.

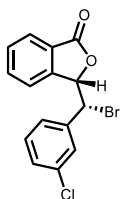

(*S*)-3-[(*R*)-Bromo(3-chlorophenyl)methyl]isobenzofuran-1(3*H*)-one (**2j**): The typical procedure using **1j** (26.0 mg, 0.100 mmol) and the reaction for 120 h gave **2j** (13.1 mg, 41%) as a colorless solid of mp 114.5–115.6 °C:  $[\alpha]_D^{24} -8.21$  (*c* 0.380, CHCl<sub>3</sub>) for 78:22 er. <sup>1</sup>H NMR (CDCl<sub>3</sub>, 400 MHz): 7.86 (d, *J* = 7.5, 1H), 7.69–7.67 (m, 2H), 7.56 (m, 1H), 7.39 (d, *J* = 2.5,

## Supporting Information I

1H), 7.33–7.27 (m, 3H), 5.91 (d,  $J = 7.0$ , 1H), 5.08 (d,  $J = 7.0$ , 1H).  $^1\text{H NMR}$  was in agreement with that reported.<sup>3)</sup> The er was determined by HPLC (Daicel Chiralpak AD-H, *i*-PrOH/hexane 1:19, 0.6 mL/min, 220 nm, 40 °C, retention time = 26.6 min (*3R,αS*) and 29.6 min (*3S,αR*)). The absolute configuration was tentatively assigned by analogy.

**(S)-3-[(R)-Bromo(2-methylphenyl)methyl]isobenzofuran-1(3H)-one (2k) and (3R,4S)-4-Bromo-3-(2-methylphenyl)-3,4-dihydroisochromen-1-one (3k)**: The typical procedure using **1k** (24.0 mg, 0.100 mmol) and the reaction for 120 h gave a 3:1 mixture of **2k** and **3k** (24.2 mg, 77%) as a colorless oil. The ratio of **2k** and **3k** was determined on the basis of the integral area of  $^1\text{H NMR}$  signals at 5.33 and 5.53 ppm in the crude mixture. The isomers were separated by column chromatography (hexane/EtOAc 10:1) for characterization.

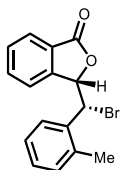

**2k**: Colorless solid of mp 148.5–149.4 °C.  $[\alpha]_{\text{D}}^{24} +4.78$  (*c* 0.750,  $\text{CHCl}_3$ ) for 82:18 er.  $^1\text{H NMR}$  ( $\text{CDCl}_3$ , 400 MHz): 7.91 (d,  $J = 10.0$ , 1H), 7.83 (dd,  $J = 7.0$ , 1.0, 1H), 7.71–7.66 (m, 2H), 7.60 (t,  $J = 8.0$ , 1H), 7.31–7.22 (m, 2H), 7.16 (d,  $J = 8.0$ , 1H), 6.00 (d,  $J = 8.0$ , 1H), 5.33 (d,  $J = 8.0$ , 1H), 2.36 (s, 3H).  $^{13}\text{C NMR}$  ( $\text{CDCl}_3$ , 100 MHz): 169.2 (C), 146.7 (C), 135.5 (C), 135.2 (C), 133.8 (CH), 130.8 (CH), 130.0 (CH), 128.9 (CH), 128.6 (CH), 126.7 (CH), 126.5 (C), 125.8 (CH), 124.6 (CH), 81.3 (CH), 49.9 (CH), 19.5 (CH<sub>3</sub>). **MS** (ESI)  $m/z$ : 317 (M + H), 319 (M + 2 + H). **HRMS** (ESI)  $m/z$ : [M + H]<sup>+</sup> calcd for C<sub>16</sub>H<sub>14</sub>O<sub>2</sub>Br, 317.0177; found, 317.0190. **IR** (NaCl): 3020, 2931, 2860, 1766, 1648, 1457, 1299, 1198, 1057, 968, 737. The er was determined by HPLC (Daicel Chiralpak AD-H, *i*-PrOH/hexane 1:11, 0.6 mL/min, 220 nm, 40 °C, retention time = 12.5 min (*3R,αS*) and 14.5 min (*3S,αR*)). The absolute configuration was tentatively assigned by analogy.

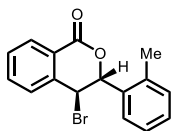

**3k**: Colorless oil.  $[\alpha]_{\text{D}}^{24} +1.30$  (*c* 0.784,  $\text{CHCl}_3$ ) for 58:42 er.  $^1\text{H NMR}$  ( $\text{CDCl}_3$ , 400 MHz): 8.19 (dd,  $J = 8.0$ , 1.5, 1H), 7.64 (td,  $J = 8.0$ , 1.5, 1H), 7.53–7.50 (m, 2H), 7.25–7.21 (m, 2H), 7.12–7.05 (m, 2H), 6.09 (d,  $J = 5.0$ , 1H), 5.53 (d,  $J = 5.0$ , 1H), 2.48 (s, 3H).  $^1\text{H NMR}$  was in agreement with that reported.<sup>10)</sup> The er was determined by HPLC (Daicel Chiralpak AD-H, *i*-PrOH/hexane 1:5, 0.6 mL/min, 254 nm, 40 °C, retention time = 12.9 min (*3R,4S*) and 13.6 min (*3S,4R*)). The absolute configuration was tentatively assigned by analogy.

**(S)-3-[(R)-Bromo(2-chlorophenyl)methyl]isobenzofuran-1(3H)-one (2l) and (3RS,4SR)-4-Bromo-3-(2-chlorophenyl)-3,4-dihydroisochromen-1-one (3l)**: The typical procedure using **1l** (26.0 mg, 0.100 mmol) at –40 °C gave a 3:1 mixture of **2l** and **3l** (24.0 mg, 72%) as a colorless oil. The ratio of **2l** and **3l** was determined on the basis of the integral area of  $^1\text{H NMR}$  signals at 5.80 and 5.66 ppm in the crude mixture. The isomers were separated by preparative TLC (hexane/EtOAc 5:1) and further characterized.

10) Chen, T.; Yeung, Y. Y. *Org. Biomol. Chem.* **2016**, *14*, 4571.

## Supporting Information I

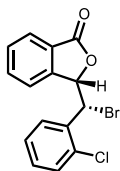

**2l:** Colorless solid of mp 110.2–111.8 °C.  $[\alpha]_{\text{D}}^{20} -1.47$  (*c* 0.134,  $\text{CHCl}_3$ ) for 80:20 er.  $^1\text{H NMR}$  ( $\text{CDCl}_3$ , 400 MHz): 7.86 (d,  $J = 7.5$ , 1H), 7.75 (d,  $J = 7.5$ , 1H), 7.68–7.40 (m, 3H), 7.35–7.25 (m, 3H), 6.00 (d,  $J = 6.0$ , 1H), 5.80 (d,  $J = 6.0$ , 1H).  $^1\text{H NMR}$  was in agreement with that reported.<sup>3)</sup> The er was determined by HPLC (Daicel Chiralpak IC-3, *i*-PrOH/hexane 1:29, 0.6 mL/min, 220 nm, 40 °C, retention time = 21.0 min ( $3R,\alpha S$ ) and 27.1 min ( $3S,\alpha R$ )). The absolute configuration was tentatively assigned by analogy.

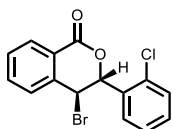

**3l:** Colorless solid of mp 129.7–131.1 °C in 50:50 er.  $^1\text{H NMR}$  ( $\text{CDCl}_3$ , 400 MHz): 8.20 (d,  $J = 8.0$ , 1H), 7.59 (t,  $J = 8.0$ , 1H), 7.51 (t,  $J = 8.0$ , 1H), 7.42–7.37 (m, 2H), 7.26 (t,  $J = 8.0$ , 1H), 7.16 (t,  $J = 8.0$ , 1H), 7.09 (d,  $J = 8.0$ , 1H), 6.30 (d,  $J = 3.5$ , 1H), 5.61 (d,  $J = 3.5$ , 1H).  $^1\text{H NMR}$  was in agreement with that reported.<sup>9)</sup> The er was determined by HPLC (Daicel Chiralpak IC-3, *i*-PrOH/hexane 1:29, 0.6 mL/min, 230 nm, 40 °C, retention time = 22.9 min and 25.5 min).

**(S)-3-[(R)-Bromo(phenyl)methyl]-7-methylisobenzofuran-1(3H)-one (2m) and (3R,4S)-4-Bromo-3,4-dihydro-8-methyl-3-phenylisochromen-1-one (3m):** The typical procedure using **1m** (24.0 mg, 0.100 mmol) gave a 1:2 mixture of **2m** and **3m** (19.3 mg, 61%) as a colorless oil. The ratio of **2m** and **3m** was determined on the basis of the integral area of  $^1\text{H NMR}$  signals of the isomers at 5.20 and 5.52 ppm, respectively in the crude mixture. The isomers were separated by preparative TLC (hexane/EtOAc 5:1) and further characterized.

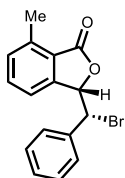

**2m:** Colorless oil.  $[\alpha]_{\text{D}}^{24} -9.30$  (*c* 0.300,  $\text{CHCl}_3$ ) for 61:39 er.  $^1\text{H NMR}$  ( $\text{CDCl}_3$ , 400 MHz): 7.48 (t,  $J = 8.0$ , 1H), 7.41–7.35 (m, 3H), 7.33–7.27 (m, 4H), 5.86 (d,  $J = 6.0$ , 1H), 5.20 (d,  $J = 6.0$ , 1H), 2.62 (s, 3H).  $^{13}\text{C NMR}$  ( $\text{CDCl}_3$ , 100 MHz): 169.3 (C), 146.7 (C), 139.8 (C), 136.0 (C), 133.4 (CH), 131.4 (CH), 128.9 (CH), 128.6 (CH), 128.5 (CH), 124.1 (C), 121.0 (CH), 81.7 (CH), 53.6 (CH), 17.3 ( $\text{CH}_3$ ). **MS** (ESI)  $m/z$ : 339 (M + Na), 341 (M + 2 + Na). **HRMS** (ESI)  $m/z$ :  $[\text{M} + \text{Na}]^+$  calcd  $\text{C}_{16}\text{H}_{13}\text{O}_2\text{NaBr}$  for, 338.9997; found, 338.9992. **IR** (NaCl): 3030, 2925, 1765, 1600, 1380, 1260, 1044. The er was determined by HPLC (Daicel Chiralpak AD-H, *i*-PrOH/hexane 1:11, 0.6 mL/min, 220 nm, 40 °C, retention time = 12.0 min ( $3R,\alpha S$ ) and 13.2 min ( $3S,\alpha R$ )). The absolute configuration was tentatively assigned by analogy.

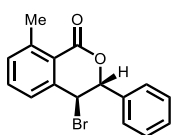

**3m:** Colorless solid of mp 93.6–94.5 °C.  $[\alpha]_{\text{D}}^{28} -2.45$  (*c* 0.660,  $\text{CHCl}_3$ ) for 48:52 er.  $^1\text{H NMR}$  ( $\text{CDCl}_3$ , 400 MHz): 7.40 (t,  $J = 8.0$ , 1H), 7.30–7.20 (m, 7H), 5.87 (d,  $J = 4.0$ , 1H), 5.52 (d,  $J = 4.0$ , 1H), 2.72 (s, 3H).  $^{13}\text{C NMR}$  ( $\text{CDCl}_3$ , 100 MHz): 162.3

## Supporting Information I

(C), 143.3 (C), 138.5 (C), 136.4 (C), 133.4 (CH), 133.3 (CH), 128.8 (CH), 128.7 (CH), 126.2 (CH), 126.1 (CH), 122.7(C), 83.2 (CH), 47.2 (CH), 22.3 (CH<sub>3</sub>). **MS** (ESI) *m/z*: 339 (M + Na), 341 (M + 2 + Na). **HRMS** (ESI) *m/z*: [M + H]<sup>+</sup> calcd C<sub>16</sub>H<sub>14</sub>O<sub>2</sub>Br for, 317.0177; found, 317.0182. **IR** (NaCl): 3020, 2924, 2851, 1730, 1216, 1118, 1050, 760. HPLC (Daicel Chiralpak IC-3, *i*-PrOH/hexane 1:5, 0.6 mL/min, 254 nm, 40 °C, retention time = 20.7 min (3*R*,4*S*) and 24.1 min (3*S*,4*R*)). The absolute configuration was tentatively assigned by analogy.

**(S)-3-[(R)-Bromo(phenyl)methyl]-6-methylisobenzofuran-1(3*H*)-one (2n) and (3*R*,4*S*)-4-Bromo-3,4-dihydro-7-methyl-3-phenylisochromen-1-one (3n)**: The typical procedure using **1n** (24.0 mg, 0.100 mmol) gave a 6:1 mixture of **2n** and **3n** (26.2 mg, 82%) as a colorless oil. The ratio of **2n** and **3n** was determined on the basis of the integral area of <sup>1</sup>H NMR signals at 5.19 and 5.55 ppm in the crude mixture. The isomers were separated by column chromatography (hexane/EtOAc 10:1) for characterization.

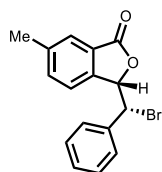

**2n**: Colorless solid of mp 154.1–154.8 °C. [ $\alpha$ ]<sub>D</sub><sup>24</sup> –22.0 (*c* 1.11, CHCl<sub>3</sub>) for 92:8 er. <sup>1</sup>H NMR (CDCl<sub>3</sub>, 400 MHz): 7.62 (s, 1H), 7.45–7.40 (m, 4H), 7.32–7.30 (m, 3H), 5.88 (d, *J* = 6.0, 1H), 5.19 (d, *J* = 6.0, 1H), 2.43 (s, 3H). <sup>13</sup>C NMR (CDCl<sub>3</sub>, 100 MHz): 169.3 (C), 143.6 (C), 140.3 (C), 136.1 (C), 134.9 (CH), 129.0 (CH), 128.63 (CH), 128.60 (CH), 126.9 (C), 125.7 (CH), 123.4 (CH), 82.4 (CH), 53.7 (CH), 21.2 (CH<sub>3</sub>). **MS** (ESI) *m/z*: 339 (M + Na), 341 (M + 2 + Na). **HRMS** (ESI) *m/z*: [M + Na]<sup>+</sup> calcd C<sub>16</sub>H<sub>13</sub>O<sub>2</sub>NaBr for, 338.9997; found, 338.9992. **IR** (NaCl): 3030, 2920, 2850, 1760, 1490, 1294, 1150, 1062. The er was determined by HPLC (Daicel Chiralpak AD-H, *i*-PrOH/hexane 1:11, 0.6 mL/min, 220 nm, 40 °C, retention time = 18.3 min (3*R*, $\alpha$ *S*) and 20.3 min (3*S*, $\alpha$ *R*)). The absolute configuration was tentatively assigned by analogy.

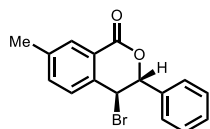

**3n**: Colorless solid of mp 112.8–113.6 °C. [ $\alpha$ ]<sub>D</sub><sup>27</sup> +1.51 (*c* 0.153, CHCl<sub>3</sub>) for 63:37 er; lit: [ $\alpha$ ]<sub>D</sub><sup>27</sup> +58.0 (*c* 1.0, CHCl<sub>3</sub>) for the other enantiomer with 80% ee.<sup>10</sup> <sup>1</sup>H NMR (CDCl<sub>3</sub>, 400 MHz): 7.96 (s, 1H), 7.39 (dd, *J* = 8.0, 1.0, 1H), 7.34–7.30 (m, 4H), 7.28–7.26 (m, 2H), 5.91 (d, *J* = 4.5, 1H), 5.55 (d, *J* = 4.5, 1H), 2.40 (s, 3H). <sup>1</sup>H NMR was in agreement with that reported.<sup>11</sup> The er was determined by HPLC (Daicel Chiralpak IC-3, *i*-PrOH/hexane 1:2, 0.6 mL/min, 230 nm, 40 °C, retention time = 15.5 min (3*R*,4*S*) and 16.6 min (3*S*,4*R*)).

**(S)-3-[(R)-Bromo(phenyl)methyl]-6-chloroisobenzofuran-1(3*H*)-one (2o) and (3*R*,4*S*)-4-Bromo-7-chloro-3,4-dihydro-3-phenylisochromen-1-one (3o)**: The typical procedure using **1o** (26.0 mg, 0.100 mmol) gave a 1:1 mixture of **2o** and **3o** (26.9 mg, 79%) as a colorless oil. The ratio of **2o** and **3o** was determined on the basis of the integral area of <sup>1</sup>H NMR signals at 5.21 and 5.52 ppm in the crude mixture. The isomers were separated by preparative TLC (hexane/EtOAc 5:1) for characterization.

11) Nishiyori, R.; Tsuchihashi, A.; Mochizuki, A.; Kaneko, K.; Yamanaka, M.; Shirakawa, S. *Chem.–Eur. J.*, 2018, **24**, 16747.

## Supporting Information I

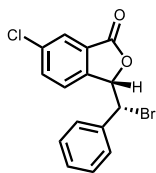

**2o**: Colorless solid of mp 119.2–120.3 °C.  $[\alpha]_D^{24} -15.2$  (*c* 0.840, CHCl<sub>3</sub>) for 80:20 er. **<sup>1</sup>H NMR** (CDCl<sub>3</sub>, 400 MHz): 7.80 (d, *J* = 2.0, 1H), 7.60 (dd, *J* = 8.0, 2.0, 1H), 7.49 (d, *J* = 8.0, 1H), 7.41 (m, 2H), 7.35–7.33 (m, 3H), 5.89 (d, *J* = 6.0, 1H), 5.21 (d, *J* = 6.0, 1H). **<sup>13</sup>C NMR** (CDCl<sub>3</sub>, 100 MHz): 167.6 (C), 144.3 (C), 136.4 (C), 135.6 (C), 134.0 (CH), 129.2 (CH), 128.8 (CH), 128.6 (C), 128.5 (CH), 125.6 (CH), 125.1 (CH), 82.2 (CH), 53.2 (CH). **MS** (ESI) *m/z*: 359 (M + Na), 361 (M + 2 + Na), 363 (M + 4 + Na). **HRMS** (ESI) *m/z*: [M + K]<sup>+</sup> calcd for, C<sub>15</sub>H<sub>10</sub>O<sub>2</sub>ClKBr for 374.9190; found, 374.9181. **IR** (NaCl): 3030, 2923, 1777, 1469, 1291, 1206, 1060, 757. The er was determined by HPLC (Daicel Chiralpak AD-H, *i*-PrOH/hexane 1:11, 0.6 mL/min, 220 nm, 40 °C, retention time = 16.8 min (3*R*,*αS*) and 21.9 min (3*S*,*αR*). The absolute configuration was tentatively assigned by analogy.

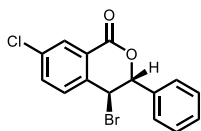

**3o**: Colorless solid of mp 149.5–150.2 °C.  $[\alpha]_D^{29} +2.45$  (*c* 1.22, CHCl<sub>3</sub>) for 53:47 er. **<sup>1</sup>H NMR** (CDCl<sub>3</sub>, 400 MHz): 8.12 (d, *J* = 2.0, 1H), 7.55 (dd, *J* = 8.0, 2.0, 1H), 7.41 (d, *J* = 8.0, 1H), 7.34–7.32 (m, 2H), 7.25 (m, 3H), 5.91 (d, *J* = 4.0, 1H), 5.52 (d, *J* = 4.0, 1H). **<sup>13</sup>C NMR** (CDCl<sub>3</sub>, 100 MHz): 161.9 (C), 136.12 (C), 136.10 (C), 135.9 (C), 134.6 (CH), 130.2 (CH), 129.8 (CH), 129.1 (CH), 128.9 (CH), 126.3 (CH), 125.5 (C), 84.1 (CH), 45.0 (CH). **MS** (ESI) *m/z*: 359 (M + Na), 361 (M + 2 + Na), 363 (M + 4 + Na). **HRMS** (ESI) *m/z*: [M + Na]<sup>+</sup> calcd C<sub>15</sub>H<sub>10</sub>O<sub>2</sub>ClNa for, 358.9450; found, 358.9451. **IR** (NaCl): 3066, 2921, 2850, 1737, 1417, 1230, 1132, 1079, 755. The er was determined by HPLC (Daicel Chiralpak AD-H, *i*-PrOH/hexane 1:5, 0.6 mL/min, 254 nm, 40 °C, retention time = 13.2 min (3*R*,4*S*) and 14.9 min (3*S*,4*R*). The absolute configuration was tentatively assigned by analogy.

**(S)-3-[(R)-Bromo(phenyl)methyl]-5-methylisobenzofuran-1(3*H*)-one (2p) and (3*R*,4*S*)-4-Bromo-3,4-dihydro-6-methyl-3-phenylisochromen-1-one (3p)**: The typical procedure using **1p** (24.0 mg, 0.100 mmol) and NBP (27.1 mg, 0.100 mmol) gave a 1:1 mixture of **2p** and **3p** (27.1 mg, 85%) as a colorless oil. The ratio of **2p** and **3p** was determined on the basis of the integral area of <sup>1</sup>H NMR signals at 5.17 and 5.50 ppm in the crude mixture. The isomers were separated by preparative TLC (hexane/EtOAc 5:1) for characterization.

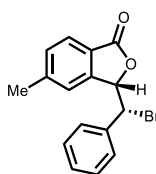

**2p**: Colorless solid of mp 151.1–152.8 °C.  $[\alpha]_D^{24} +6.13$  (*c* 0.402, CHCl<sub>3</sub>) for 86:14 er. **<sup>1</sup>H NMR** (CDCl<sub>3</sub>, 400 MHz): 7.70 (d, *J* = 7.5, 1H), 7.42–7.40 (m, 3H), 7.34–7.30 (m, 4H), 5.88 (d, *J* = 6.0, 1H), 5.17 (d, *J* = 6.0, 1H), 2.48 (s, 3H). **<sup>13</sup>C NMR** (CDCl<sub>3</sub>, 100 MHz): 169.2 (C), 146.8 (C), 145.1 (C), 136.1 (C), 131.0 (CH), 129.0 (CH), 128.6 (CH), 128.5 (CH), 125.5 (CH), 124.1 (C), 124.1 (CH), 82.2 (CH), 53.5 (CH), 22.1 (CH<sub>3</sub>). **MS** (ESI) *m/z*: 339 (M + Na), 341 (M + 2 + Na). **HRMS** (ESI) *m/z*: [M + H]<sup>+</sup> calcd C<sub>16</sub>H<sub>14</sub>O<sub>2</sub>Br for, 317.0177; found, 317.0163. **IR** (NaCl): 3020, 2924, 1770, 1610, 1455, 1281,



## Supporting Information I

1073, 770. The er was determined by HPLC (Daicel Chiralpak AD-H, *i*-PrOH/hexane 1:29, 0.6 mL/min, 220 nm, 40 °C, retention time = 30.6 min (*3R,αS*) and 37.0 min (*3S,αR*)). The absolute configuration was tentatively assigned by analogy.

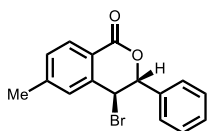

**3p**: Colorless solid of mp 109.2–110.8 °C.  $[\alpha]_D^{29} +2.37$  (*c* 0.400, CHCl<sub>3</sub>) for 52:48 er. **<sup>1</sup>H NMR** (CDCl<sub>3</sub>, 400 MHz): 8.03 (d, *J* = 8.0, 1H), 7.32–7.24 (m, 7H), 5.90 (d, *J* = 4.5, 1H), 5.50 (d, *J* = 4.5, 1H), 2.40 (s, 3H). **<sup>13</sup>C NMR** (CDCl<sub>3</sub>, 100 MHz): 163.2 (C), 145.8 (C), 137.6 (C), 136.5 (C), 130.8 (CH), 130.5 (CH), 128.9 (CH), 128.8 (CH), 128.7 (CH), 126.4 (CH), 121.5 (C), 84.1 (CH), 46.3 (CH), 21.8 (CH<sub>3</sub>). **MS** (ESI) *m/z*: 339 (M + Na), 341 (M + 2 + Na). **HRMS** (ESI) *m/z*: [M + H]<sup>+</sup> calcd C<sub>16</sub>H<sub>14</sub>O<sub>2</sub>Br for, 317.0177; found, 317.0182. **IR** (NaCl): 3030, 2923, 1729, 1613, 1375, 1239, 1077, 767. The er was determined by HPLC (Daicel Chiralpak AD-H, *i*-PrOH/hexane 1:5, 0.6 mL/min, 254 nm, 40 °C, retention time = 13.9 min (*3R,4S*) and 15.0 min (*3S,4R*)). The absolute configuration was tentatively assigned by analogy.

---

## Supporting Information I

### 6. X-ray diffraction

**Data collection and Structure solution details:** Single crystal X-ray data for compound **2b** was collected on a Rigaku XtaLaB P200 diffractometer Cu-K $\alpha$  radiation. Data collection, cell refinement, data reduction and analysis were carried out with the CrysAlisPro (Rigaku Oxford Diffraction). This structure was solved by intrinsic phasing methods with the SHELXT program and refined using SHELXL<sup>12</sup> with anisotropic displacement parameters for non-H atoms. CCDC 2189245 contains the supplementary crystallographic data for this paper. These data can be obtained free of charge from the Cambridge Crystallographic Data Centre via [http://www.ccdc.cam.ac.uk/data\\_request/cif](http://www.ccdc.cam.ac.uk/data_request/cif)

X-ray crystallographic data for compound **2b** (CCDC 2189245).

Single crystals of **2b** were obtained by slow evaporation of a solution containing **2b** in the mixture of hexane and ethyl acetate at room temperature. A suitable crystal was selected and the crystal data and structure refinement results for compound **2b** are listed in the Table S1.

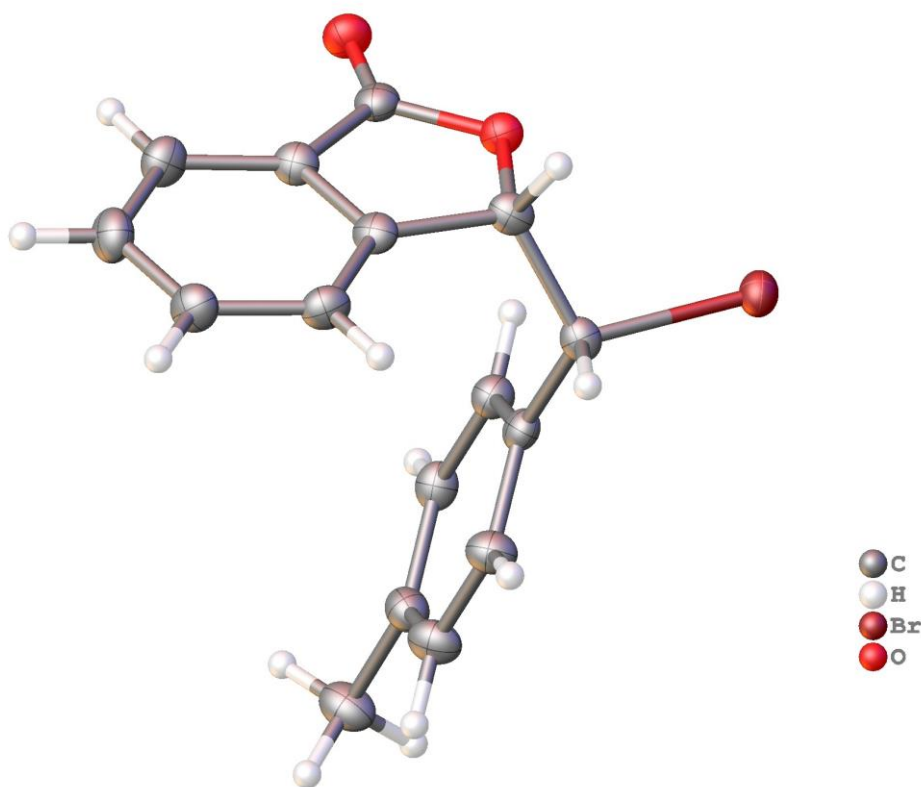

**Figure S1.** ORTEP view of the compound **2b** with thermal ellipsoids drawn at the 50% probability level

**Table 1 Crystal data and structure refinement for 2b.**

|                     |                                                  |
|---------------------|--------------------------------------------------|
| Identification code | 220708KY_auto (1)                                |
| Empirical formula   | C <sub>16</sub> H <sub>13</sub> BrO <sub>2</sub> |
| Formula weight      | 317.17                                           |
| Temperature/K       | 93                                               |

<sup>12</sup> Sheldrick, G. M. A. Short History of SHELX. *Acta Crystallogr., Sect. A: Found. Crystallogr.* **2008**, *64*, 112– 122.

## Supporting Information I

|                                             |                                                               |
|---------------------------------------------|---------------------------------------------------------------|
| Crystal system                              | tetragonal                                                    |
| Space group                                 | P4 <sub>3</sub>                                               |
| a/Å                                         | 8.67730(10)                                                   |
| b/Å                                         | 8.67730(10)                                                   |
| c/Å                                         | 17.8920(5)                                                    |
| $\alpha$ /°                                 | 90                                                            |
| $\beta$ /°                                  | 90                                                            |
| $\gamma$ /°                                 | 90                                                            |
| Volume/Å <sup>3</sup>                       | 1347.19(5)                                                    |
| Z                                           | 4                                                             |
| $\rho_{\text{calc}}$ /cm <sup>3</sup>       | 1.564                                                         |
| $\mu$ /mm <sup>-1</sup>                     | 4.114                                                         |
| F(000)                                      | 640.0                                                         |
| Crystal size/mm <sup>3</sup>                | 0.2 × 0.1 × 0.1                                               |
| Radiation                                   | Cu K $\alpha$ ( $\lambda$ = 1.54184)                          |
| 2 $\Theta$ range for data collection/°      | 10.194 to 144.442                                             |
| Index ranges                                | -5 ≤ h ≤ 9, -6 ≤ k ≤ 10, -21 ≤ l ≤ 20                         |
| Reflections collected                       | 9588                                                          |
| Independent reflections                     | 2584 [R <sub>int</sub> = 0.0376, R <sub>sigma</sub> = 0.0244] |
| Data/restraints/parameters                  | 2584/1/173                                                    |
| Goodness-of-fit on F <sup>2</sup>           | 1.101                                                         |
| Final R indexes [I ≥ 2 $\sigma$ (I)]        | R <sub>1</sub> = 0.0635, wR <sub>2</sub> = 0.1655             |
| Final R indexes [all data]                  | R <sub>1</sub> = 0.0637, wR <sub>2</sub> = 0.1657             |
| Largest diff. peak/hole / e Å <sup>-3</sup> | 1.06/-0.70                                                    |
| Flack parameter                             | -0.02(5)                                                      |

## Supporting Information I

### 7. DFT calculation

The initial transition state (TS) search was conducted using Gaussian 09W program at the B3LYP/6-31G(d) theoretical level. After conformational search, the geometry optimization of the conformers at the HF/3-21G theoretical level was performed with the coordinates of the two olefinic carbon atoms, the carboxylate oxygen atom, and the bromine atom fixed. Finally, TS search was performed at the  $\omega$ B97X-D/6-31G(d) theoretical level to give the TS<sub>major</sub> and TS<sub>minor</sub>. The TS geometries were verified by vibrational frequency analysis. Single-point-energy calculations were performed at the  $\omega$ B97X-D/6-311+G(d,p) theoretical level with solvation correction for dichloromethane using the Polarizable Continuum Model.

TS<sub>major</sub>

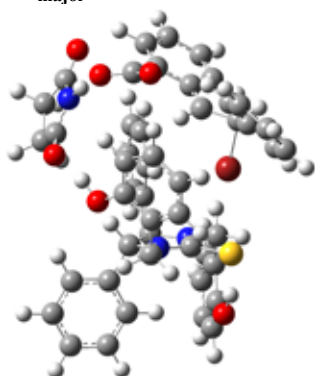

|                                               |                             |
|-----------------------------------------------|-----------------------------|
| Energies (RwB97XD) =                          | -5439.18935341              |
| Zero-point correction =                       | 0.815083 (Hartree/Particle) |
| Thermal correction to Energy =                | 0.865968                    |
| Thermal correction to Enthalpy =              | 0.866912                    |
| Thermal correction to Gibbs Free Energy =     | 0.725214                    |
| Energies (RwB97XD:PCM) =                      | -5442.29554323              |
| Sum of electronic and zero-point Energies =   | -5441.480460                |
| Sum of electronic and thermal Energies =      | -5441.429575                |
| Sum of electronic and thermal Enthalpies =    | -5441.428631                |
| Sum of electronic and thermal Free Energies = | -5441.570329                |

| Atomic | Coordinates (Angstroms) |           |           |
|--------|-------------------------|-----------|-----------|
| Type   | X                       | Y         | Z         |
| S      | -1.402501               | -3.407939 | -0.459515 |
| N      | -1.731140               | -1.291856 | 1.210896  |
| C      | -1.852625               | -1.832289 | -0.008870 |
| C      | 4.233960                | 1.772265  | 0.622446  |
| O      | 4.934869                | 0.770586  | 0.864945  |
| O      | 3.862423                | 2.688040  | 1.391805  |
| C      | 3.748448                | 1.902871  | -0.827937 |
| C      | 3.317443                | 0.763672  | -1.562269 |
| C      | 3.320473                | -0.482600 | -0.894525 |
| H      | 3.366267                | -0.488280 | 0.190547  |
| C      | 3.333174                | -1.795447 | -1.522659 |
| H      | 3.438542                | -1.796150 | -2.606791 |
| Br     | 1.366832                | -2.009133 | -1.159430 |
| C      | -2.399554               | 0.014053  | 1.307241  |
| H      | -1.687825               | 0.739766  | 1.699429  |
| C      | -1.102970               | -1.933932 | 2.362205  |
| H      | -1.343361               | -2.999017 | 2.323078  |
| H      | -1.581814               | -1.507597 | 3.248379  |
| N      | -2.426802               | -0.934915 | -0.840215 |
| C      | -2.740467               | 0.326180  | -0.172859 |

## Supporting Information I

|   |           |           |           |
|---|-----------|-----------|-----------|
| H | -3.811275 | 0.528790  | -0.281858 |
| C | -2.771074 | -1.142261 | -2.233354 |
| H | -2.266740 | -0.376783 | -2.834366 |
| H | -2.356100 | -2.111572 | -2.524319 |
| C | 3.787666  | 3.135630  | -1.468768 |
| H | 4.086284  | 4.013528  | -0.909010 |
| C | 3.420517  | 3.246803  | -2.805052 |
| H | 3.460638  | 4.220208  | -3.284053 |
| C | 2.931136  | 0.897038  | -2.917658 |
| H | 2.523804  | 0.041391  | -3.447984 |
| C | 2.98S17   | 2.130535  | -3.531062 |
| H | 2.665105  | 2.240787  | -4.562665 |
| C | 4.143845  | -2.852285 | -0.831377 |
| C | 5.706219  | -4.794713 | 0.406095  |
| C | 3.842935  | -4.203368 | -1.005349 |
| C | 5.232788  | -2.47S48  | -0.045446 |
| C | 6.0102S   | -3.447765 | 0.572018  |
| C | 4.6214S   | -5.171317 | -0.385093 |
| H | 2.977108  | -4.494283 | -1.593955 |
| H | 5.461823  | -1.418634 | 0.108553  |
| H | 6.849022  | -3.147209 | 1.191755  |
| H | 4.378080  | -6.221361 | -0.513155 |
| H | 6.309708  | -5.553145 | 0.895375  |
| C | -3.606289 | -0.047809 | 2.215254  |
| C | -5.827644 | -0.138643 | 3.899831  |
| C | -3.672495 | 0.781445  | 3.332621  |
| C | -4.652903 | -0.935641 | 1.948956  |
| C | -5.759430 | -0.977983 | 2.788203  |
| C | -4.783482 | 0.738841  | 4.172494  |
| H | -2.845188 | 1.452875  | 3.548908  |
| H | -4.601964 | -1.603318 | 1.090580  |
| H | -6.568456 | -1.670338 | 2.575866  |
| H | -4.827783 | 1.387194  | 5.042556  |
| H | -6.692726 | -0.174476 | 4.555528  |
| C | -1.95S20  | 1.468072  | -0.774156 |
| C | -0.486843 | 3.525924  | -1.968947 |
| C | -0.555456 | 1.465277  | -0.711157 |
| C | -2.605002 | 2.509066  | -1.430947 |
| C | -1.876492 | 3.536829  | -2.029730 |
| C | 0.S8041   | 2.491893  | -1.301478 |
| H | -0.033792 | 0.648074  | -0.217011 |
| H | -3.691096 | 2.507204  | -1.486304 |
| H | -2.396205 | 4.339193  | -2.545400 |
| H | 1.247737  | 2.498439  | -1.230954 |
| H | 0.094658  | 4.319741  | -2.429447 |
| C | -4.262655 | -1.057319 | -2.449152 |
| C | -7.031146 | -0.783340 | -2.752881 |
| C | -4.805769 | -0.006792 | -3.190682 |
| C | -5.135427 | -1.983048 | -1.854282 |
| C | -6.515628 | -1.835534 | -2.009299 |
| C | -6.177717 | 0.139532  | -3.353547 |
| H | -4.125774 | 0.713913  | -3.640146 |
| H | -7.S5084  | -2.565809 | -1.537828 |
| H | -6.575934 | 0.963601  | -3.936547 |
| H | -8.106764 | -0.684193 | -2.864485 |
| O | -4.728381 | -3.027295 | -1.091744 |
| C | 0.396279  | -1.744067 | 2.4S424   |
| C | 3.S4217   | -1.357941 | 2.492942  |
| C | 0.932954  | -0.475880 | 2.689985  |
| C | 1.268974  | -2.806880 | 2.203196  |
| C | 2.649392  | -2.627689 | 2.247618  |

## Supporting Information I

|   |           |           |           |
|---|-----------|-----------|-----------|
| C | 2.312845  | -0.275199 | 2.703935  |
| H | 0.852500  | -3.785069 | 1.977587  |
| H | 3.38857   | -3.465399 | 2.069740  |
| H | 2.721983  | 0.718282  | 2.873346  |
| H | 4.234946  | -1.180853 | 2.497215  |
| O | 0.050176  | 0.58726   | 2.946502  |
| H | 0.478495  | 1.39328   | 2.979054  |
| C | 1.444442  | 5.283174  | 0.89555   |
| C | 0.064199  | 5.881247  | 0.413727  |
| C | -0.61803  | 4.900594  | 1.370653  |
| C | 0.510547  | 3.982706  | 1.825202  |
| N | 1.628488  | 4.252333  | 1.076588  |
| H | -0.454629 | 6.010303  | -0.537398 |
| H | 0.201070  | 6.873283  | 0.856253  |
| H | -1.087909 | 5.360739  | 2.238750  |
| H | -1.359673 | 4.279499  | 0.865244  |
| O | 0.423218  | 3.140461  | 2.698335  |
| O | 2.247830  | 5.644670  | -0.661996 |
| H | -3.764861 | -3.170073 | -1.117156 |
| H | 2.509636  | 3.692210  | 1.159337  |

TS<sub>minor</sub>

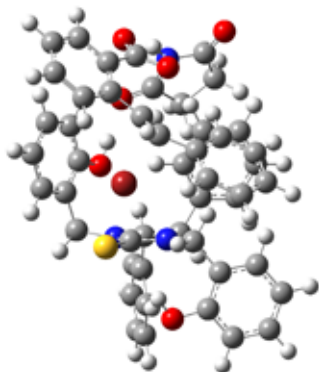

|                                               |                             |
|-----------------------------------------------|-----------------------------|
| Energies (RwB97XD) =                          | -5439.19244055              |
| Zero-point correction =                       | 0.815672 (Hartree/Particle) |
| Thermal correction to Energy =                | 0.866499                    |
| Thermal correction to Enthalpy =              | 0.867444                    |
| Thermal correction to Gibbs Free Energy =     | 0.727434                    |
| Energies (RwB97XD:PCM) =                      | -5442.29615823              |
| Sum of electronic and zero-point Energies =   | -5441.480486                |
| Sum of electronic and thermal Energies =      | -5441.429659                |
| Sum of electronic and thermal Enthalpies =    | -5441.428714                |
| Sum of electronic and thermal Free Energies = | -5441.568724                |

| Atomic | Coordinates (Angstroms) |           |           |
|--------|-------------------------|-----------|-----------|
| Type   | X                       | Y         | Z         |
| S      | 1.543677                | -2.127623 | -2.397966 |
| N      | 1.713287                | 0.562268  | -2.089842 |
| C      | 1.825043                | -0.640126 | -1.544300 |
| C      | 2.122240                | 1.616256  | -1.142781 |
| H      | 1.290635                | 2.316117  | -1.052012 |
| C      | 1.049615                | 0.871938  | -3.364501 |
| H      | 1.524501                | 0.284636  | -4.153897 |
| H      | 1.263382                | 1.927062  | -3.553578 |
| N      | 2.192223                | -0.567297 | -0.264138 |
| C      | 2.321103                | 0.827260  | 0.181381  |
| H      | 3.340495                | 0.973713  | 0.551749  |
| C      | 2.403196                | -1.660652 | 0.677347  |

## Supporting Information I

|   |           |           |           |
|---|-----------|-----------|-----------|
| H | 1.657604  | -1.571504 | 1.473203  |
| H | 2.194531  | -2.598730 | 0.157218  |
| C | 3.360982  | 2.327911  | -1.633246 |
| C | 5.636466  | 3.659479  | -2.547084 |
| C | 3.312729  | 3.692239  | -1.909127 |
| C | 4.555498  | 1.626957  | -1.825341 |
| C | 5.687625  | 2.291742  | -2.278911 |
| C | 4.448764  | 4.358629  | -2.363249 |
| H | 2.379839  | 4.232899  | -1.770296 |
| H | 4.602878  | 0.557404  | -1.626599 |
| H | 6.612861  | 1.742881  | -2.425060 |
| H | 4.402067  | 5.422626  | -2.574263 |
| H | 6.523004  | 4.176155  | -2.902088 |
| C | 1.339852  | 1.149071  | 1.284893  |
| C | -0.444728 | 1.691152  | 3.358865  |
| C | -0.031110 | 0.948376  | 1.102205  |
| C | 1.808867  | 1.625068  | 2.508059  |
| C | 0.918364  | 1.899168  | 3.544659  |
| C | -0.922268 | 1.220082  | 2.135039  |
| H | -0.400141 | 0.542152  | 0.162056  |
| H | 2.876565  | 1.770056  | 2.654382  |
| H | 1.294005  | 2.265685  | 4.495724  |
| H | -1.987221 | 1.031166  | 2.004011  |
| H | -1.149615 | 1.885893  | 4.162864  |
| C | 3.795206  | -1.606830 | 1.250260  |
| C | 6.372847  | -1.360073 | 2.300411  |
| C | 3.991959  | -1.315563 | 2.600383  |
| C | 4.916666  | -1.779119 | 0.425895  |
| C | 6.200878  | -1.649918 | 0.953350  |
| C | 5.268959  | -1.195415 | 3.134631  |
| H | 3.116794  | -1.171251 | 3.228612  |
| H | 7.048539  | -1.787164 | 0.290146  |
| H | 5.403078  | -0.971444 | 4.187792  |
| H | 7.377315  | -1.263723 | 2.701511  |
| O | 4.827762  | -2.039132 | -0.908078 |
| C | -0.434322 | 0.602588  | -3.318123 |
| C | -3.156947 | 0.038711  | -3.123665 |
| C | -1.269752 | 1.407550  | -2.528041 |
| C | -0.992163 | -0.462217 | -4.023309 |
| C | -2.348610 | -0.749213 | -3.936295 |
| C | -2.630300 | 1.111577  | -2.413607 |
| H | -0.343816 | -1.080321 | -4.638307 |
| H | -2.769533 | -1.586416 | -4.483403 |
| H | -3.265318 | 1.713694  | -1.769208 |
| H | -4.214391 | -0.183884 | -3.029733 |
| O | -0.697039 | 2.460923  | -1.895244 |
| C | -3.289327 | 3.634757  | 2.944400  |
| C | -2.147820 | 4.651727  | 2.953157  |
| C | -1.614444 | 4.641562  | 1.521588  |
| C | -2.630987 | 3.815931  | 0.750370  |
| N | -3.542284 | 3.298871  | 1.617167  |
| H | -1.409997 | 4.367093  | 3.704970  |
| H | -2.560308 | 5.623182  | 3.242885  |
| H | -1.517544 | 5.628345  | 1.062651  |
| H | -0.645629 | 4.137104  | 1.440824  |
| O | -2.628163 | 3.633905  | -0.460080 |
| O | -3.875398 | 3.204183  | 3.905948  |
| H | 3.935013  | -2.320066 | -1.157432 |
| H | -4.225313 | 2.560990  | 1.300339  |
| C | -4.454174 | 0.243561  | 0.716137  |
| O | -3.716673 | 0.000713  | 1.700643  |

## Supporting Information I

|    |           |           |           |
|----|-----------|-----------|-----------|
| O  | -5.00043  | 1.334802  | 0.423705  |
| C  | -4.709767 | -0.899405 | -0.271407 |
| C  | -3.792102 | -1.952444 | -0.463984 |
| C  | -2.577914 | -1.982813 | 0.342074  |
| H  | -2.256787 | -1.031116 | 0.741689  |
| C  | -1.913527 | -3.118732 | 0.781170  |
| H  | -2.277771 | -4.097360 | 0.472434  |
| Br | -0.512143 | -2.456552 | -1.021574 |
| C  | -5.889565 | -0.894124 | -1.013887 |
| H  | -6.575427 | -0.067347 | -0.863243 |
| C  | -6.168077 | -1.905935 | -1.924936 |
| H  | -7.098375 | -1.889473 | -2.485319 |
| C  | -4.064339 | -2.949979 | -1.410785 |
| H  | -3.318270 | -3.713964 | -1.613441 |
| C  | -5.244557 | -2.930845 | -2.136115 |
| H  | -5.442411 | -3.704881 | -2.871205 |
| C  | -0.944508 | -3.082772 | 1.894664  |
| C  | 0.953971  | -2.973653 | 3.940258  |
| C  | 0.037068  | -4.075819 | 2.003191  |
| C  | -0.986831 | -2.052863 | 2.839284  |
| C  | -0.031949 | -1.995407 | 3.850499  |
| C  | 0.982483  | -4.020761 | 3.017772  |
| H  | 0.073252  | -4.872936 | 1.264894  |
| H  | -1.778892 | -1.311170 | 2.796469  |
| H  | -0.066694 | -1.182713 | 4.569116  |
| H  | 1.747618  | -4.787677 | 3.087699  |
| H  | 1.697004  | -2.929917 | 4.731067  |
| H  | -1.379260 | 2.973767  | -1.405634 |

### TS<sub>major</sub> without a succinimide residue

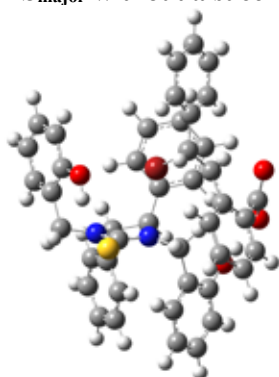

|                                               |                             |
|-----------------------------------------------|-----------------------------|
| Energies (RwB97XD) =                          | -5078.59701649              |
| Zero-point correction =                       | 0.719993 (Hartree/Particle) |
| Thermal correction to Energy =                | 0.763483                    |
| Thermal correction to Enthalpy =              | 0.764427                    |
| Thermal correction to Gibbs Free Energy =     | 0.640317                    |
| Energies (RwB97XD:PCM) =                      | -5081.59975719              |
| Sum of electronic and zero-point Energies =   | -5080.879764                |
| Sum of electronic and thermal Energies =      | -5080.836274                |
| Sum of electronic and thermal Enthalpies =    | -5080.835330                |
| Sum of electronic and thermal Free Energies = | -5080.959440                |

| Atomic | Coordinates (Angstroms) |           |           |
|--------|-------------------------|-----------|-----------|
| Type   | X                       | Y         | Z         |
| S      | 1.021586                | 0.344587  | -2.923496 |
| N      | 2.082968                | 1.727544  | -0.847879 |
| C      | 1.483295                | 0.609214  | -1.312760 |
| C      | -1.539393               | -3.337539 | 1.747335  |
| O      | -2.616037               | -2.970906 | 2.249088  |



## Supporting Information I

|    |           |           |           |
|----|-----------|-----------|-----------|
| O  | -0.426719 | -3.500258 | 2.303482  |
| C  | -1.517095 | -3.607155 | 0.226597  |
| C  | -2.190948 | -2.781021 | -0.710246 |
| C  | -2.934575 | -1.679308 | -0.193304 |
| H  | -2.997189 | -1.656485 | 0.894864  |
| C  | -3.718468 | -0.706390 | -0.940370 |
| H  | -3.825661 | -0.879718 | -2.008457 |
| Br | -2.021076 | 0.365714  | -0.702513 |
| C  | 2.489011  | 1.591475  | 0.554667  |
| H  | 2.218682  | 2.500290  | 1.098934  |
| C  | 2.261439  | 2.970212  | -1.571069 |
| H  | 2.147120  | 2.748092  | -2.635794 |
| H  | 3.291690  | 3.309126  | -1.417258 |
| N  | 1.289535  | -0.230195 | -0.280167 |
| C  | 1.622489  | 0.399560  | 1.013481  |
| H  | 2.207103  | -0.305785 | 1.609452  |
| C  | 0.946836  | -1.637846 | -0.383231 |
| H  | 0.296847  | -1.871940 | 0.457985  |
| H  | 0.378900  | -1.767277 | -1.306742 |
| C  | -0.720426 | -4.642693 | -0.257145 |
| H  | -0.169738 | -5.244682 | 0.457080  |
| C  | -0.597809 | -4.867223 | -1.620875 |
| H  | 0.035451  | -5.674759 | -1.975751 |
| C  | -2.035184 | -3.004598 | -2.096786 |
| H  | -2.493312 | -2.332976 | -2.816064 |
| C  | -1.250924 | -4.043858 | -2.548197 |
| H  | -1.120386 | -4.208561 | -3.612100 |
| C  | -4.898574 | -0.044506 | -0.324494 |
| C  | -7.156903 | 1.214463  | 0.718814  |
| C  | -5.833485 | 0.546976  | -1.176834 |
| C  | -5.099704 | -0.001980 | 1.059142  |
| C  | -6.226792 | 0.625560  | 1.573047  |
| C  | -6.959672 | 1.174567  | -0.657841 |
| H  | -5.676234 | 0.520520  | -2.252120 |
| H  | -4.389276 | -0.454258 | 1.743645  |
| H  | -6.380724 | 0.651464  | 2.647041  |
| H  | -7.681547 | 1.629128  | -1.328703 |
| H  | -8.036832 | 1.700975  | 1.128020  |
| C  | 3.981145  | 1.364923  | 0.688253  |
| C  | 6.726003  | 0.932443  | 0.989124  |
| C  | 4.759212  | 2.256034  | 1.424080  |
| C  | 4.590899  | 0.256289  | 0.092851  |
| C  | 5.953622  | 0.039615  | 0.247747  |
| C  | 6.127960  | 2.042999  | 1.574787  |
| H  | 4.290663  | 3.119781  | 1.891015  |
| H  | 4.002720  | -0.449218 | -0.487133 |
| H  | 6.407390  | -0.835181 | -0.207754 |
| H  | 6.723717  | 2.742213  | 2.153980  |
| H  | 7.791212  | 0.760499  | 1.111674  |
| C  | 0.338264  | 0.756564  | 1.747219  |
| C  | -2.166791 | 1.237018  | 2.906198  |
| C  | -0.286065 | 1.999269  | 1.600974  |
| C  | -0.295197 | -0.230343 | 2.505072  |
| C  | -1.548515 | -0.000840 | 3.067436  |
| C  | -1.525690 | 2.240148  | 2.184850  |
| H  | 0.175389  | 2.794616  | 1.026026  |
| H  | 0.177854  | -1.195244 | 2.655480  |
| H  | -2.032481 | -0.807604 | 3.608940  |
| H  | -1.993520 | 3.211448  | 2.053056  |
| H  | -3.141452 | 1.423003  | 3.349095  |
| C  | 2.182587  | -2.507409 | -0.389236 |

### Supporting Information I

|   |           |           |           |
|---|-----------|-----------|-----------|
| C | 4.645230  | -3.832852 | -0.424455 |
| C | 2.869905  | -2.710425 | -1.589232 |
| C | 2.724499  | -3.017202 | 0.802002  |
| C | 3.961651  | -3.667275 | 0.772712  |
| C | 4.095483  | -3.365527 | -1.617214 |
| H | 2.442223  | -2.311661 | -2.505825 |
| H | 4.364710  | -4.036349 | 1.710078  |
| H | 4.617675  | -3.504958 | -2.558702 |
| H | 5.605647  | -4.340877 | -0.427980 |
| O | 2.132964  | -2.844907 | 2.010747  |
| H | 1.180677  | -3.120939 | 2.004945  |
| C | 1.294133  | 4.029873  | -1.087665 |
| C | -0.465333 | 5.922497  | 0.000247  |
| C | -0.093340 | 3.907095  | -1.284801 |
| C | 1.764975  | 5.112718  | -0.342030 |
| C | 0.905585  | 6.060056  | 0.201881  |
| C | -0.960033 | 4.857883  | -0.740093 |
| H | 2.837385  | 5.203018  | -0.182408 |
| H | 1.299941  | 6.890197  | 0.778519  |
| H | -2.024594 | 4.729520  | -0.906463 |
| H | -1.155617 | 6.649193  | 0.418498  |
| O | -0.684715 | 2.886456  | -1.949602 |
| H | -0.053458 | 2.288713  | -2.402401 |

---
