# Supplementary material for: 5-exo-Selective asymmetric bromolactonization of stilbenecarboxylic acids catalyzed by phenol-bearing chiral thiourea
Source: Royal Society of Chemistry journal article supplement (doi:10.1039/d3ob01895d), 2023-12-09
Supplement: d3ob01895d2.pdf [file d3ob01895d2.pdf]

# 5-*exo*-Selective Asymmetric Bromolactonization of Stilbenecarboxylic Acids Catalyzed by Phenol-bearing Chiral Thiourea

Masayuki Sugano,<sup>†</sup> Tsubasa Inokuma,<sup>†,‡</sup> Yousuke Yamaoka,<sup>§</sup> and Ken-ichi Yamada<sup>\*,†,‡</sup>

<sup>†</sup>Graduate School of Pharmaceutical Sciences, Tokushima University, Shomachi, Tokushima 770-8505,

Japan. <sup>‡</sup>Research Cluster on “Key Material Development”, Tokushima University, Shomachi, Tokushima

770-8505, Japan. <sup>§</sup>Graduate School of Pharmaceutical Sciences, Kyoto University, Yoshida, Sakyo-ku,

Kyoto 606-8501, Japan.

yamak@tokushima-u.ac.jp

## Contents

|                                                                  |     |
|------------------------------------------------------------------|-----|
| 1. Copies of <sup>1</sup> H and <sup>13</sup> C NMR spectra..... | S2  |
| 2. Copies of HPLC charts .....                                   | S72 |

# Supporting Information II

## 1. Copies of $^1\text{H}$ and $^{13}\text{C}$ NMR spectra

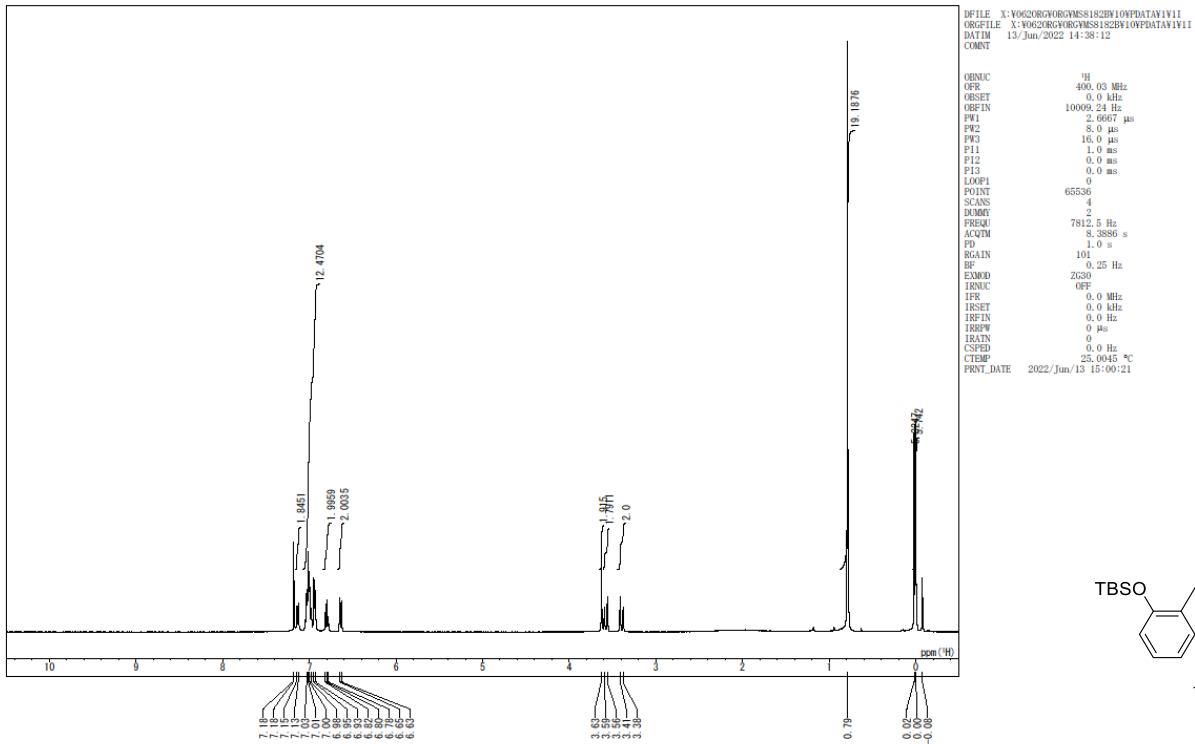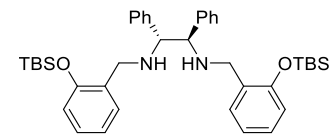

$^1\text{H}$  NMR of S2a

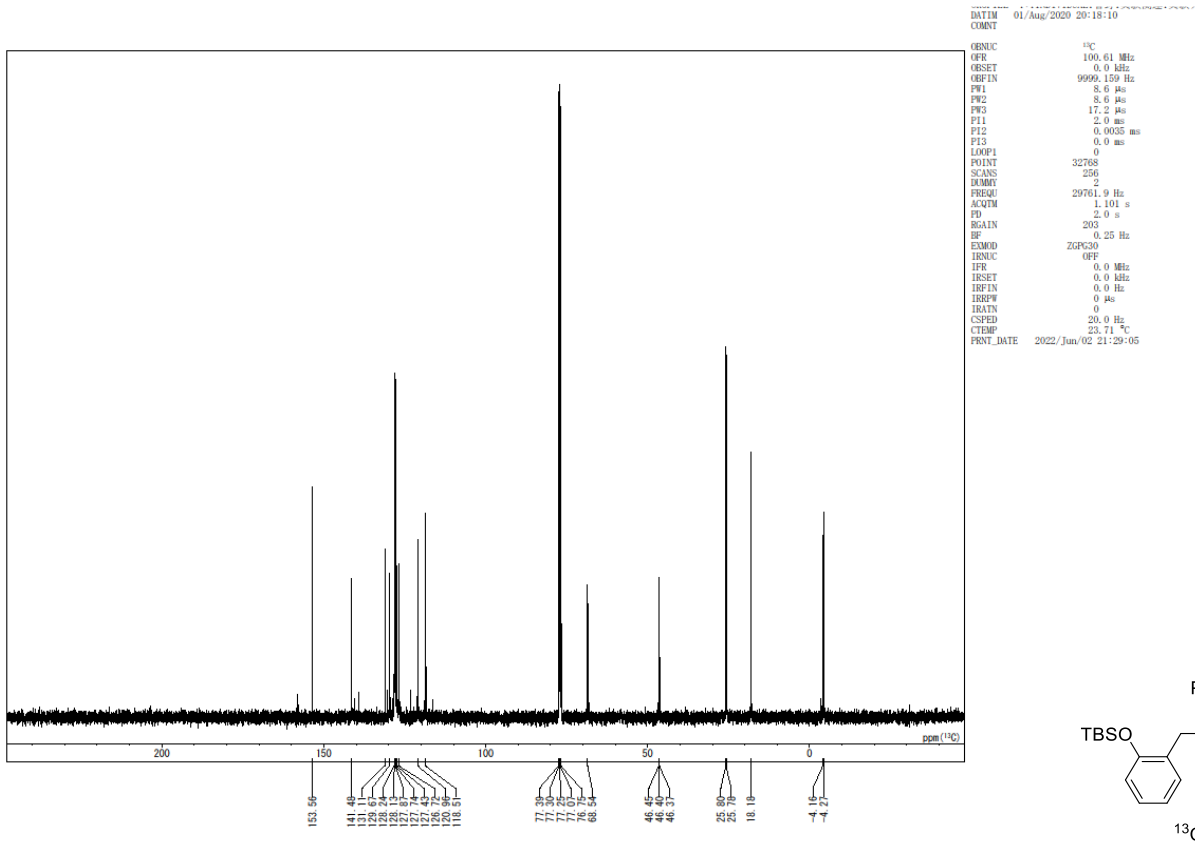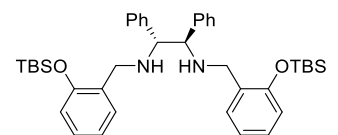

$^{13}\text{C}$  NMR of S2a

# Supporting Information II

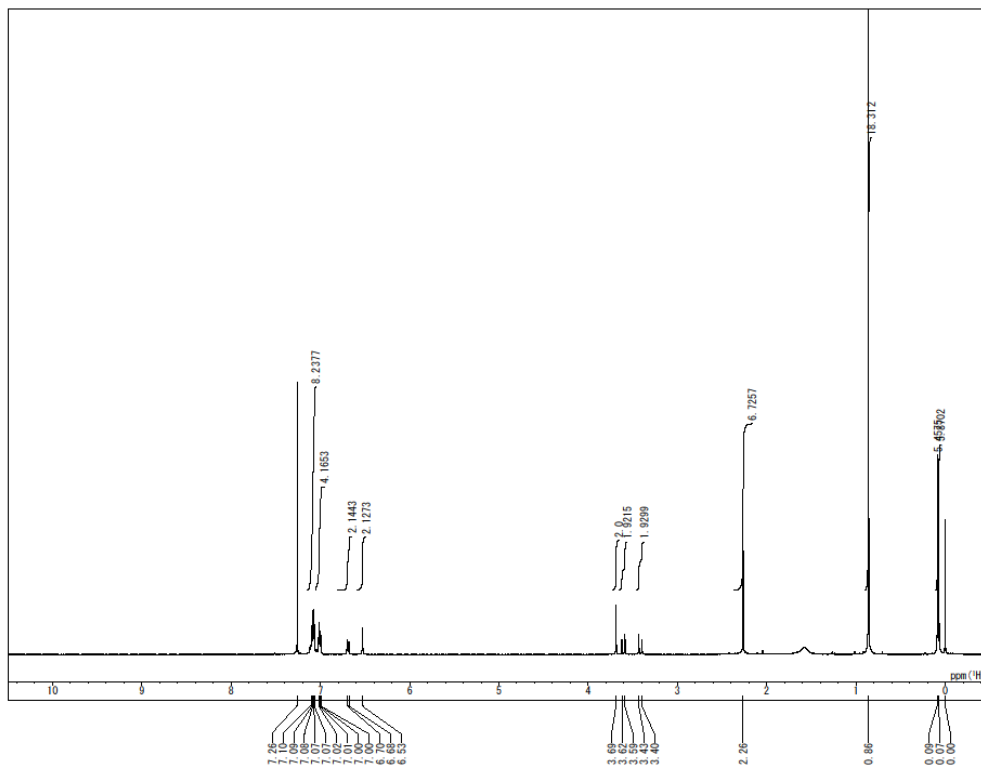

D:\FILE X:\V06208\DATA\06\NMR\MSS177B\10\FIDAT  
 ORF\FILE X:\V06208\DATA\06\NMR\MSS177B\10\FID  
 DATIM 06/Jun/2022 14:58:36  
 COMNT  
 ORNUC <sup>1</sup>H  
 OFR 400.13 MHz  
 ORSET 0.0 kHz  
 OFBIN 10021.89 Hz  
 PW1 15.0 μs  
 PW2 15.0 μs  
 PW3 30.0 μs  
 P11 1.0 ms  
 P12 0.0 ms  
 P13 0.0 ms  
 LOOP1 0  
 POINT 32768  
 SCANS 4  
 DOMM 2  
 FREQ 8012.82 Hz  
 ACQTM 4.0894 s  
 PD 1.0 s  
 RGAIN 144  
 BF 0.25 Hz  
 EXMOD ZG30  
 TRUC OFF  
 IFR 0.0 MHz  
 IRSET 0.0 kHz  
 IREFIN 0.0 Hz  
 IRRPW 0 μs  
 IRATN 0  
 CSFD 20.0 Hz  
 CTEMP 25.31 °C  
 PRNT\_DATE 2022/Jun/06 15:05:44

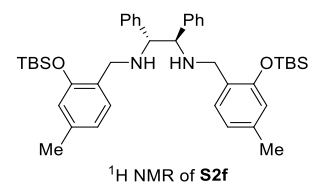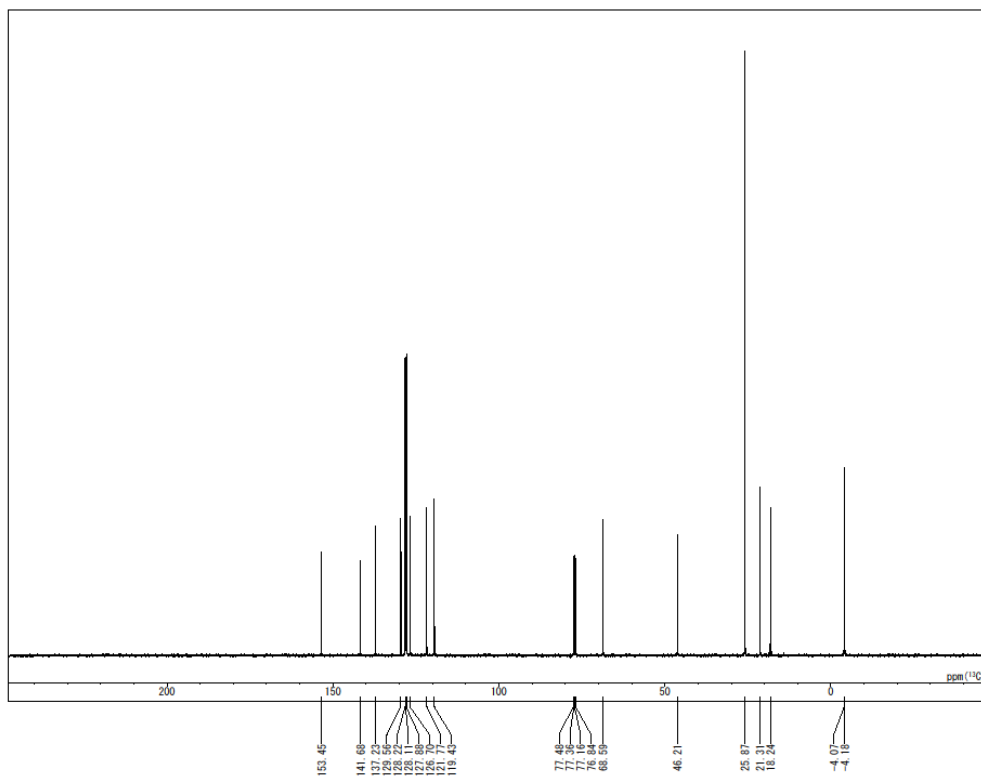

D:\FILE X:\V06208\DATA\06\NMR\MSS177B-NMR\10  
 ORF\FILE X:\V06208\DATA\06\NMR\MSS177B-NMR  
 DATIM 06/Jun/2022 15:30:46  
 COMNT  
 ORNUC <sup>13</sup>C  
 OFR 100.61 MHz  
 ORSET 0.0 kHz  
 OFBIN 9999.159 Hz  
 PW1 10.0 μs  
 PW2 10.0 μs  
 PW3 20.0 μs  
 P11 2.0 ms  
 P12 0.0035 ms  
 P13 0.0 ms  
 LOOP1 0  
 POINT 32768  
 SCANS 256  
 DOMM 2  
 FREQ 29761.9 Hz  
 ACQTM 1.101 s  
 PD 2.0 s  
 RGAIN 203  
 BF 0.25 Hz  
 EXMOD ZGPG30  
 TRUC OFF  
 IFR 0.0 MHz  
 IRSET 0.0 kHz  
 IREFIN 0.0 Hz  
 IRRPW 0 μs  
 IRATN 0  
 CSFD 20.0 Hz  
 CTEMP 26.21 °C  
 PRNT\_DATE 2022/Jun/06 15:42:32

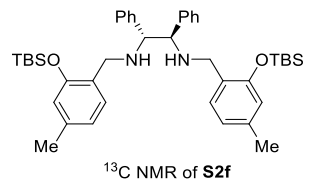

# Supporting Information II

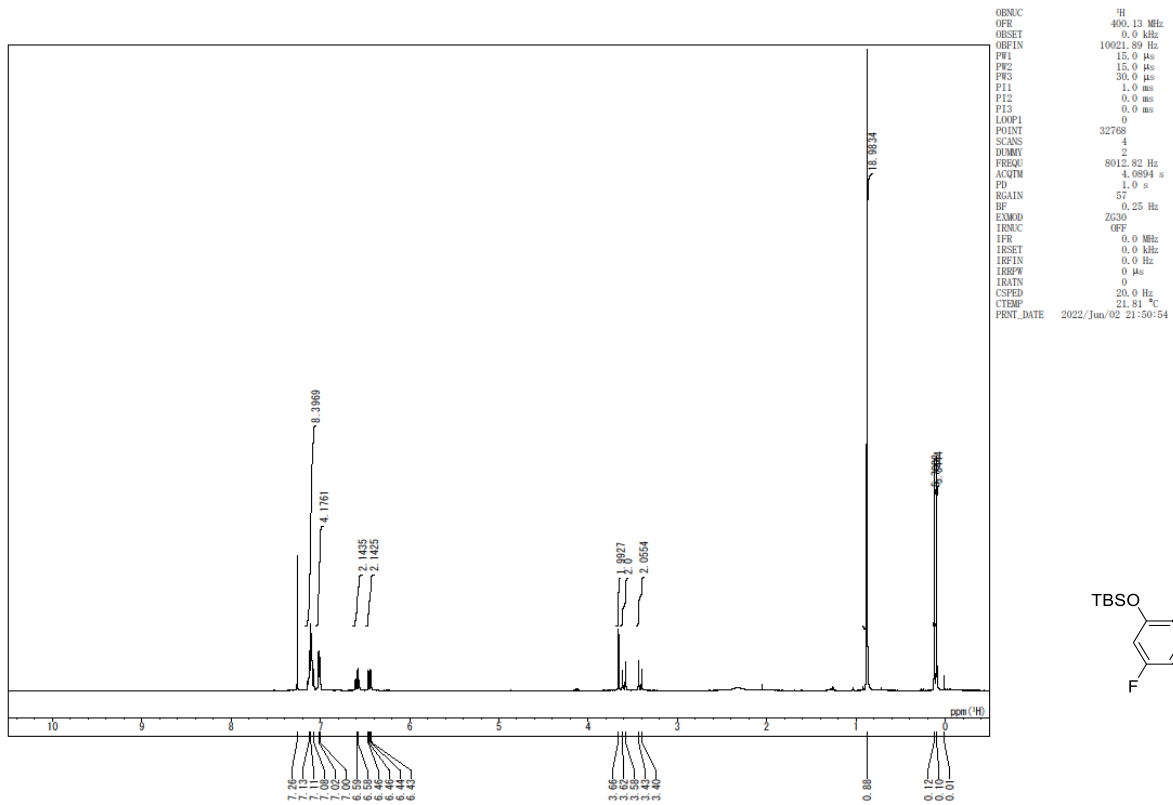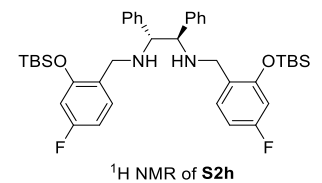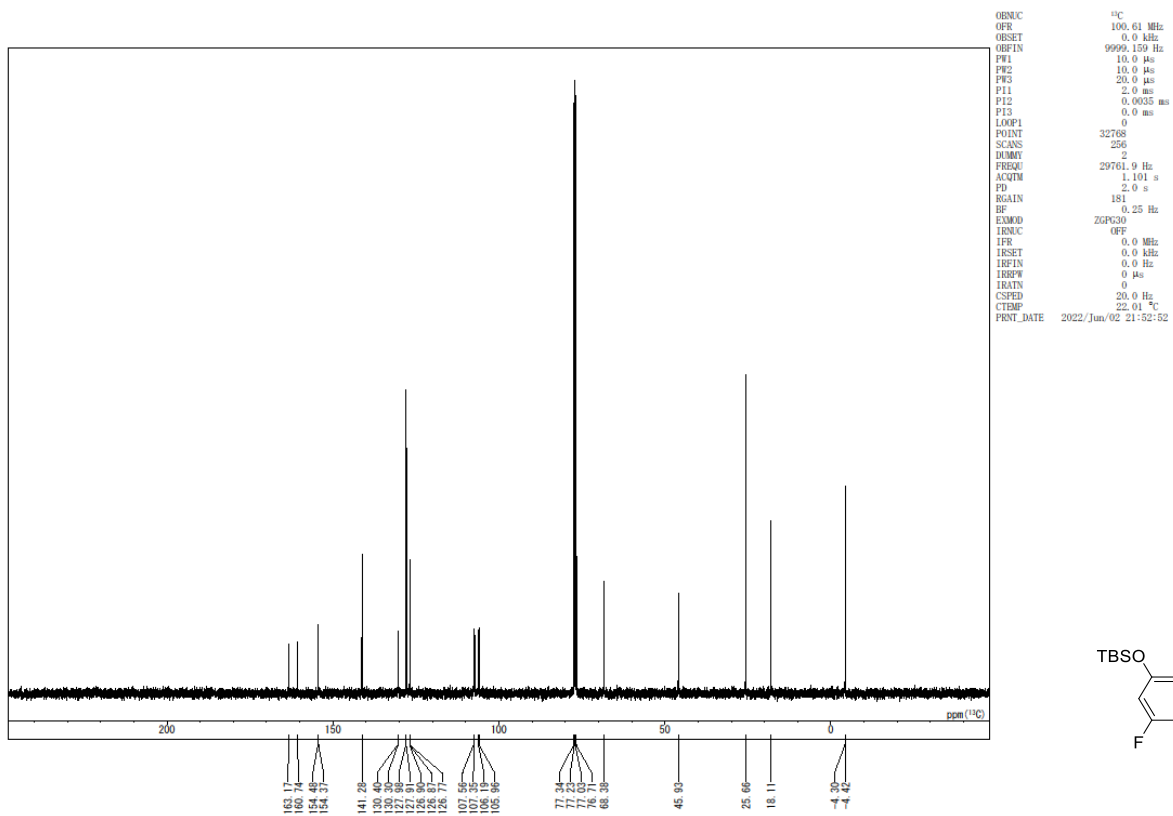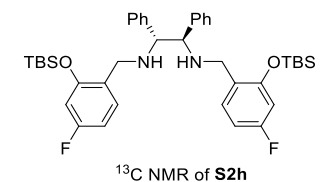

# Supporting Information II

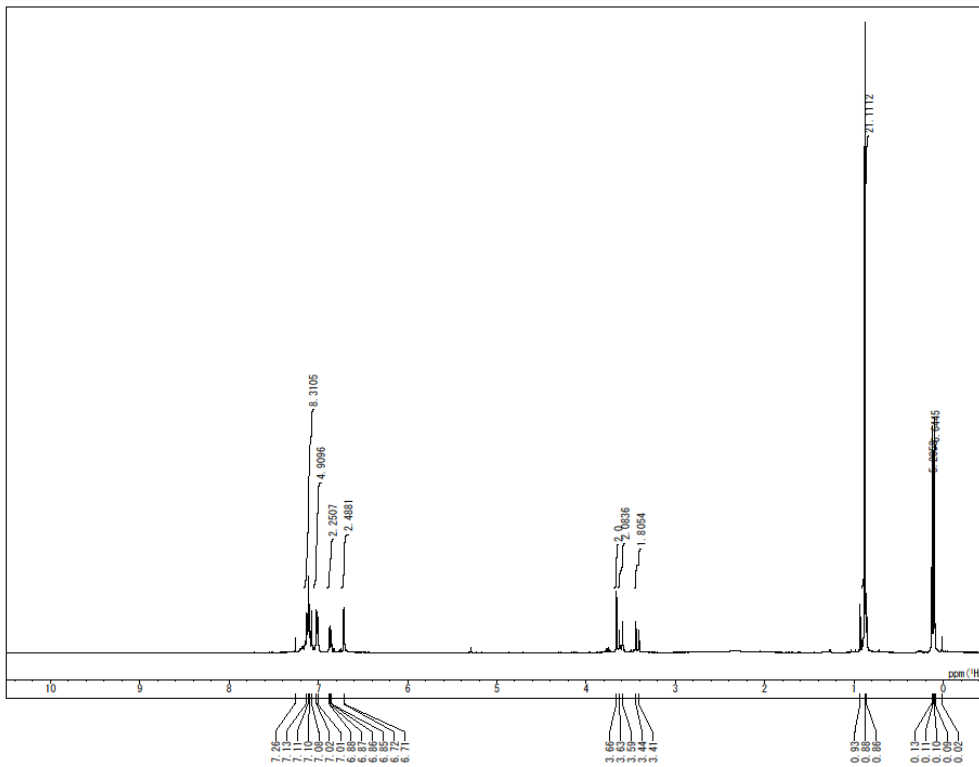

```

OBSUC      400.13 MHz
OFR        0.0 kHz
OBSET      10021.89 Hz
OBFIN      15.0 µs
PW1        15.0 µs
PWS        30.0 µs
P11        1.0 ms
P12        0.0 ms
P13        0.0 ms
LOOP1      0
POINT      32768
SCANS      4
DUMMY      2
FREQ      8012.82 Hz
ACQTM      4.0594 s
PD         1.0 s
RGAIN      45
BF         0.25 Hz
EMOD       ZG30
IRNUC      OFF
IFR        0.0 MHz
IRSET      0.0 kHz
IRFIN      0.0 Hz
IRPWP      0 µs
IRATN      0
CSPED      20.0 Hz
CTEMP      21.71 °C
PRNT_DATE  2022/Jun/02 21:59:47
    
```

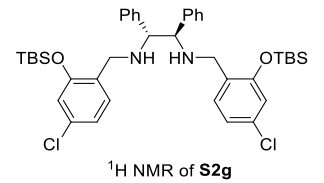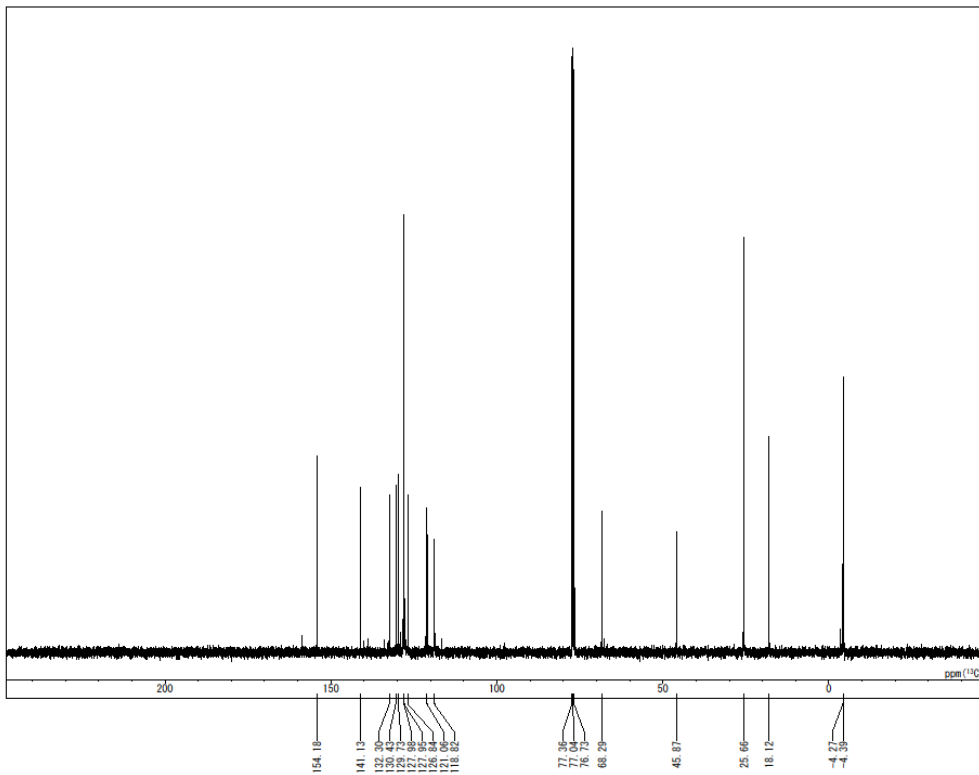

```

OBSUC      100.61 MHz
OFR        0.0 kHz
OBSET      9999.159 Hz
OBFIN      10.0 µs
PW1        10.0 µs
PWS        20.0 µs
P11        2.0 ms
P12        0.0033 ms
P13        0.0 ms
LOOP1      0
POINT      32768
SCANS      256
DUMMY      2
FREQ      29761.9 Hz
ACQTM      1.191 s
PD         2.0 s
RGAIN      114
BF         0.25 Hz
EMOD       ZGPG30
IRNUC      OFF
IFR        0.0 MHz
IRSET      0.0 kHz
IRFIN      0.0 Hz
IRPWP      0 µs
IRATN      0
CSPED      20.0 Hz
CTEMP      22.01 °C
PRNT_DATE  2022/Jun/02 21:56:50
    
```

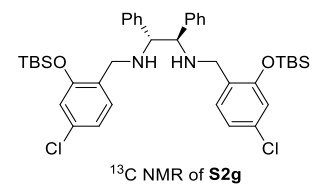

# Supporting Information II

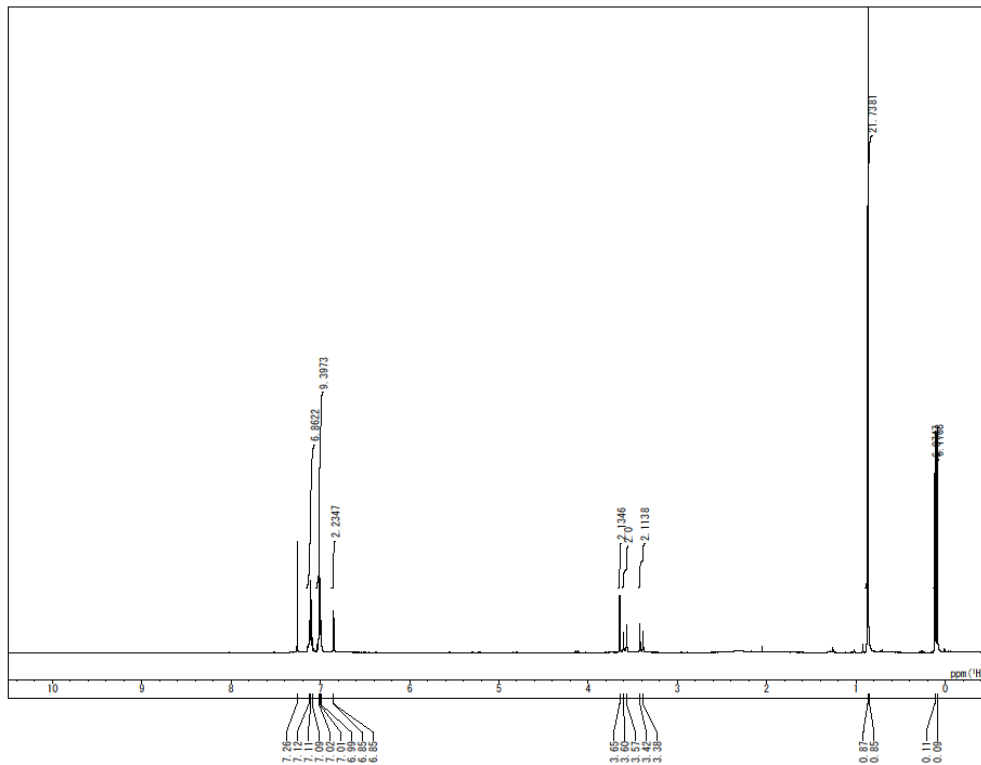

```

OBSUC      400.13 MHz
OFR         0.0 kHz
OBSET      10021.89 Hz
OBFIN      15.0 µs
PW1        15.0 µs
PW2        30.0 µs
PFS        1.0 ms
P11        0.0 ms
P12        0.0 ms
P13        0.0 ms
LOOP1      0
POINT      32768
SCANS      4
DUMY       2
FREQ      8012.82 Hz
ACQTM     4.0894 s
PD         1.0 s
RGAIN     64
BF         0.25 Hz
EMOD      ZG30
IRNUC     OFF
IFR        0.0 MHz
IRSET     0.0 kHz
IRFIN     0.0 Hz
IRPW      0 µs
IRATN     0
CSPEF     20.0 Hz
CTEMP     21.61 °C
PRNT_DATE 2022/Jan/02 22:05:44
    
```

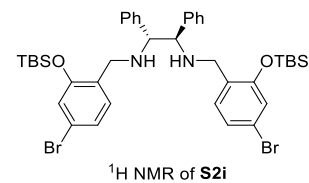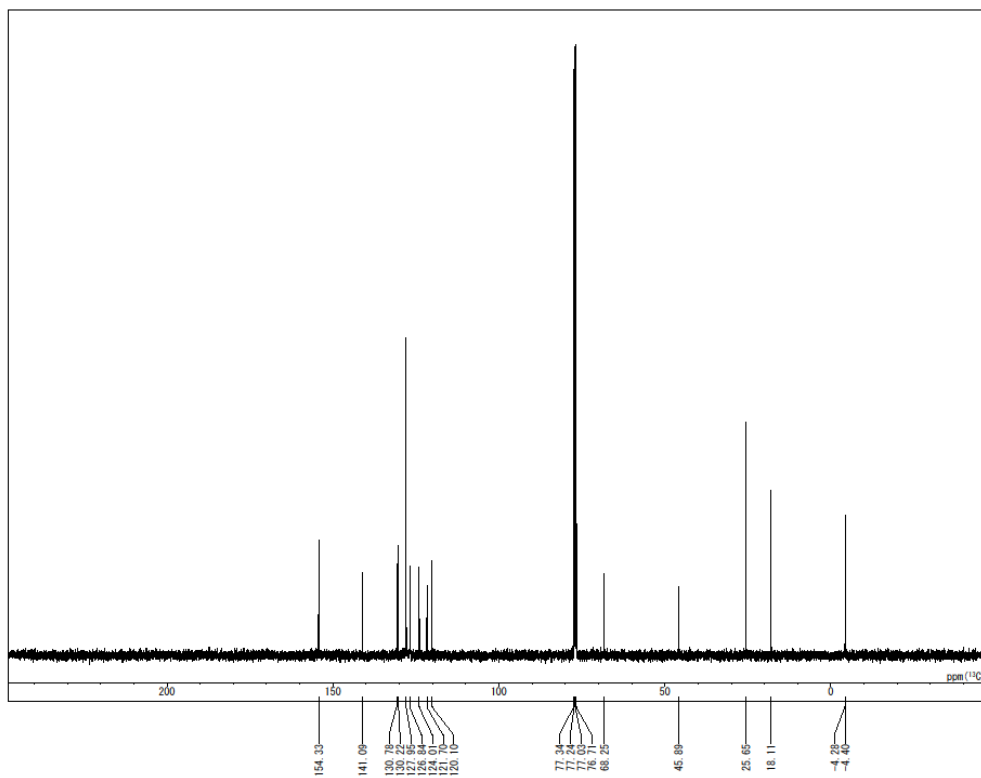

```

OBSUC      100.61 MHz
OFR         0.0 kHz
OBSET      9999.159 Hz
OBFIN      10.0 µs
PW1        10.0 µs
PW2        20.0 µs
PFS        2.0 ms
P11        0.0035 ms
P12        0.0 ms
P13        0.0 ms
LOOP1      0
POINT      32768
SCANS      256
DUMY       2
FREQ      29761.9 Hz
ACQTM     1.191 s
PD         2.0 s
RGAIN     161
BF         0.25 Hz
EMOD      ZGPG30
IRNUC     OFF
IFR        0.0 MHz
IRSET     0.0 kHz
IRFIN     0.0 Hz
IRPW      0 µs
IRATN     0
CSPEF     20.0 Hz
CTEMP     22.61 °C
PRNT_DATE 2022/Jan/02 22:02:29
    
```

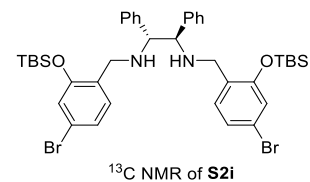

# Supporting Information II

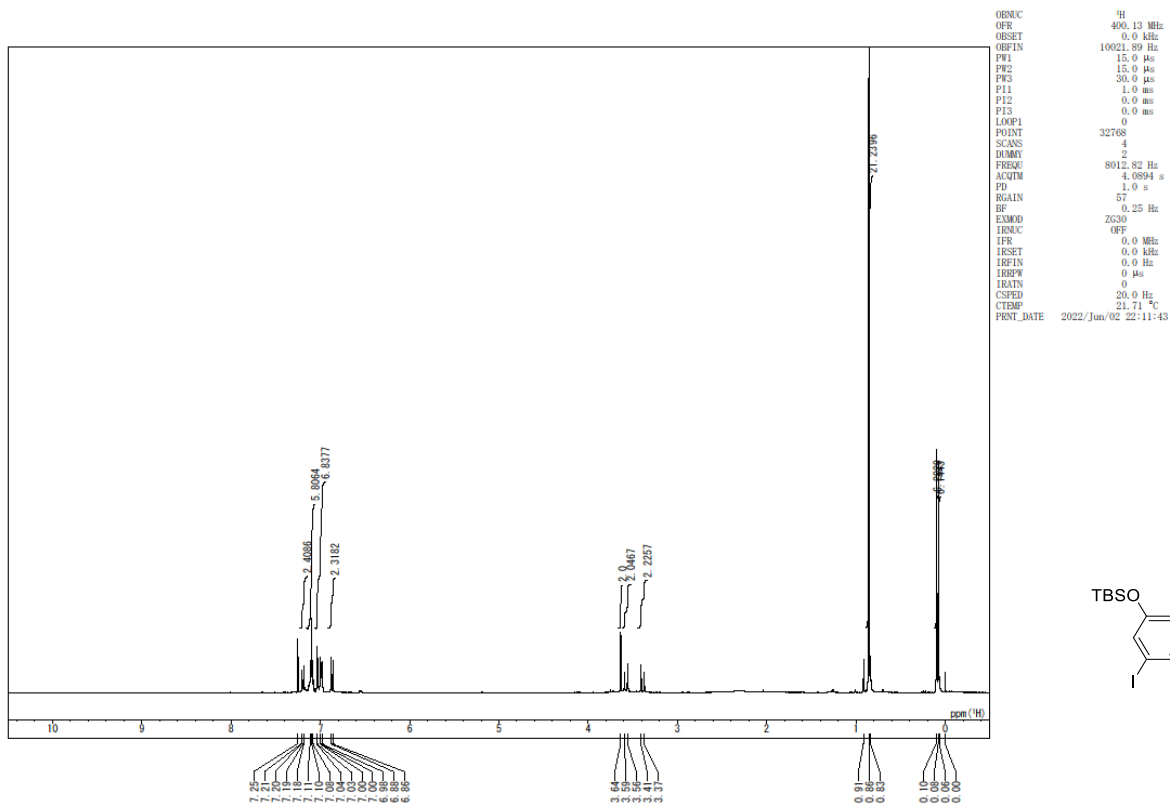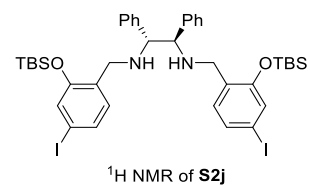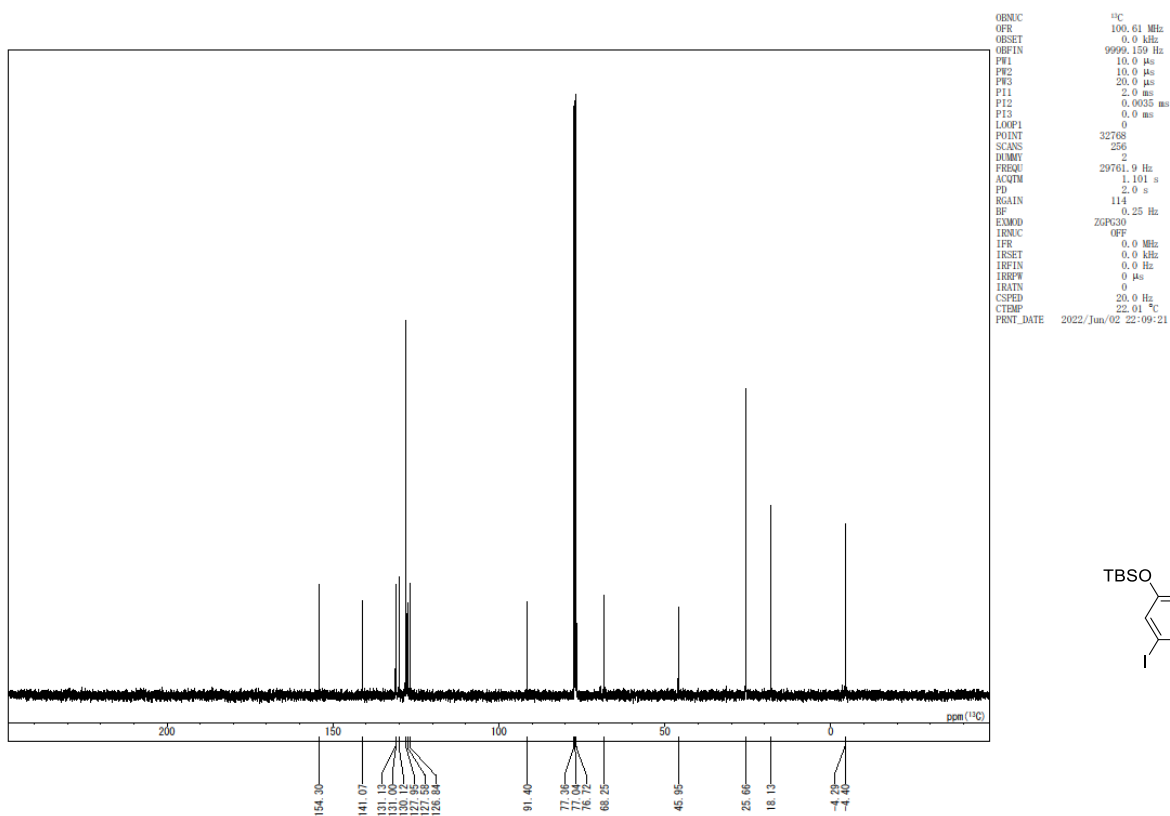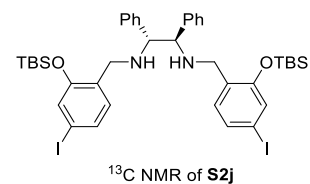

# Supporting Information II

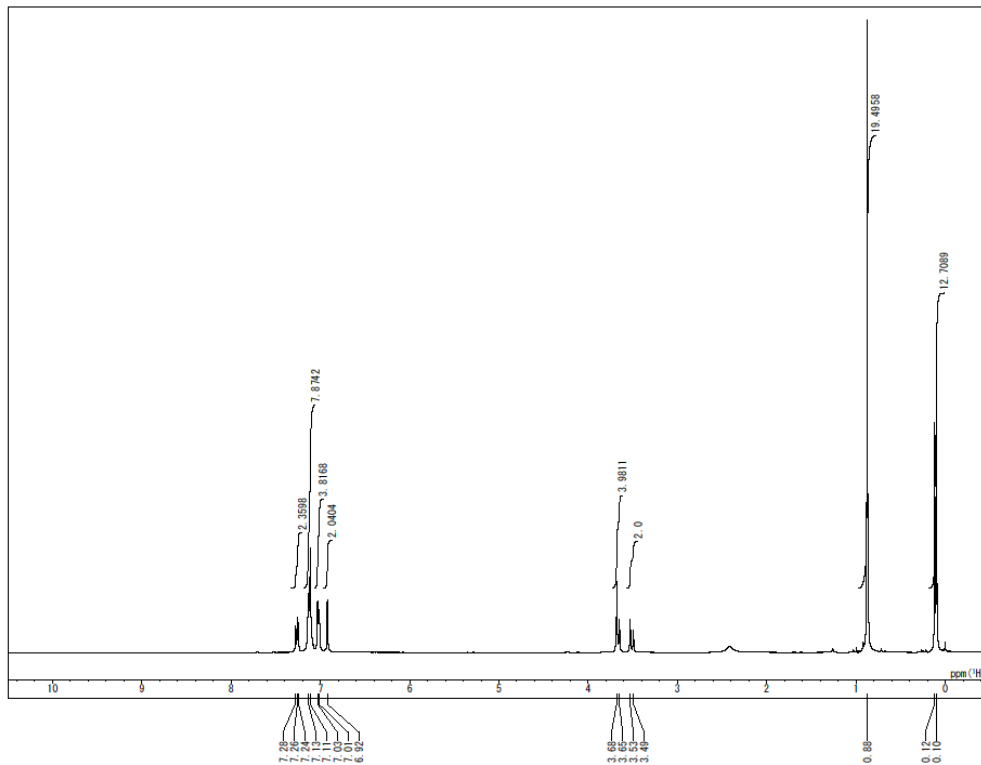

```

OBSUC      400.13 MHz
OFR        0.0 kHz
OBSET      10021.89 Hz
OBFIN      15.0 µs
PW1        15.0 µs
PW2        30.0 µs
PFS        1.0 ms
P11        0.0 ms
P12        0.0 ms
P13        0.0 ms
LOOP1      0
POINT      32768
SCANS      4
DUMMY      2
FREQ      8012.82 Hz
ACQTM      4.0594 s
PD         1.0 s
RGAIN      40
BF         0.25 Hz
EMOD       ZG30
IRNUC      OFF
IFR        0.0 MHz
IRSET      0.0 kHz
IRFIN      0.0 Hz
IRBPW      0 µs
IRATN      0
CSPED      20.0 Hz
CTEMP      21.91 °C
PRNT_DATE  2022/Jan/02 22:17:22
    
```

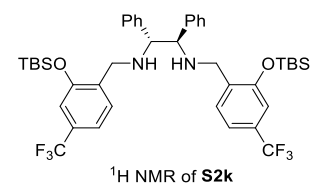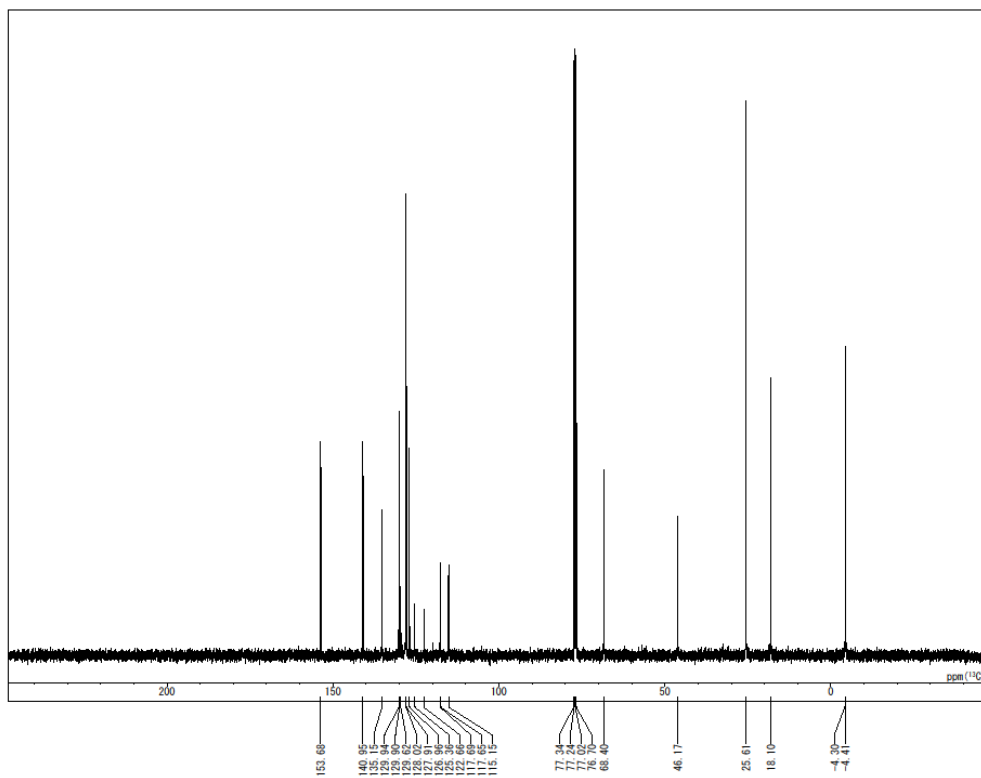

```

OBSUC      100.61 MHz
OFR        0.0 kHz
OBSET      9999.159 Hz
OBFIN      10.0 µs
PW1        10.0 µs
PW2        20.0 µs
PFS        2.0 ms
P11        0.0035 ms
P12        0.0 ms
P13        0.0 ms
LOOP1      0
POINT      32768
SCANS      256
DUMMY      2
FREQ      29761.9 Hz
ACQTM      1.191 s
PD         2.0 s
RGAIN      114
BF         0.25 Hz
EMOD       ZGPG30
IRNUC      OFF
IFR        0.0 MHz
IRSET      0.0 kHz
IRFIN      0.0 Hz
IRBPW      0 µs
IRATN      0
CSPED      20.0 Hz
CTEMP      22.01 °C
PRNT_DATE  2022/Jan/02 22:14:47
    
```

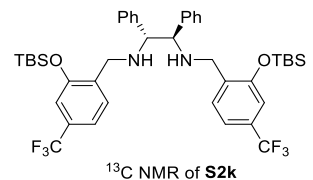



# Supporting Information II

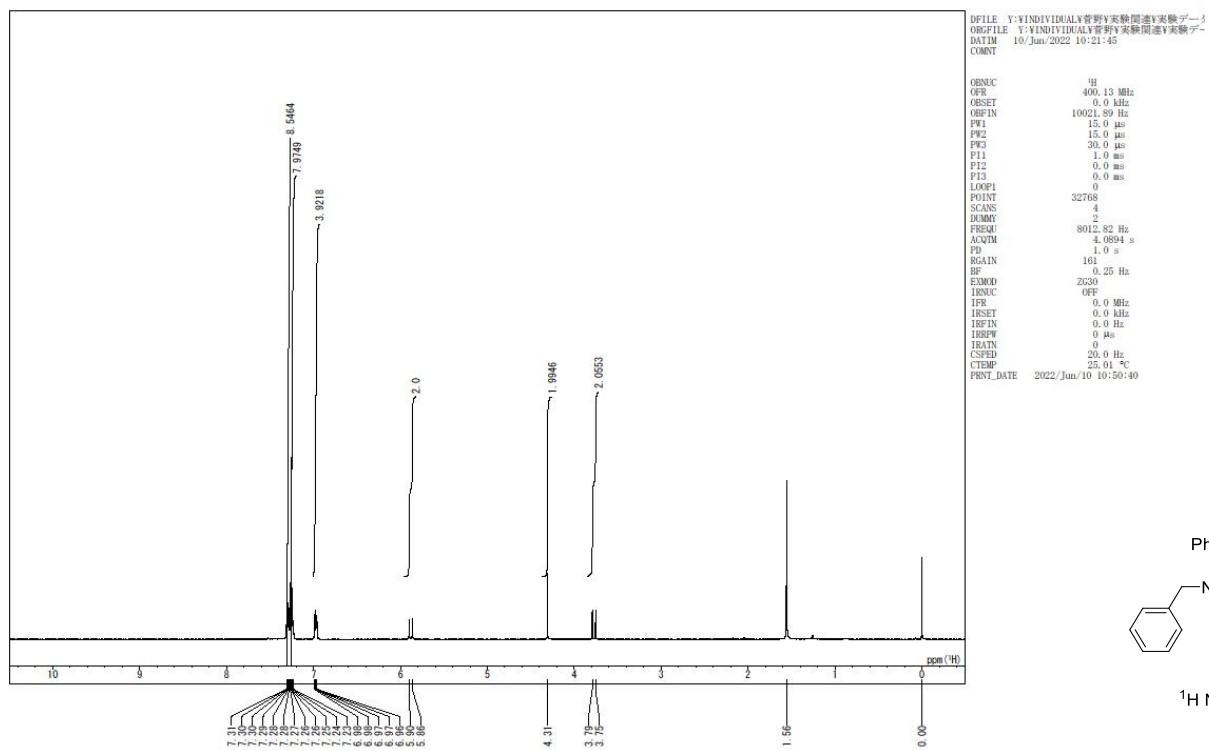

# Supporting Information II

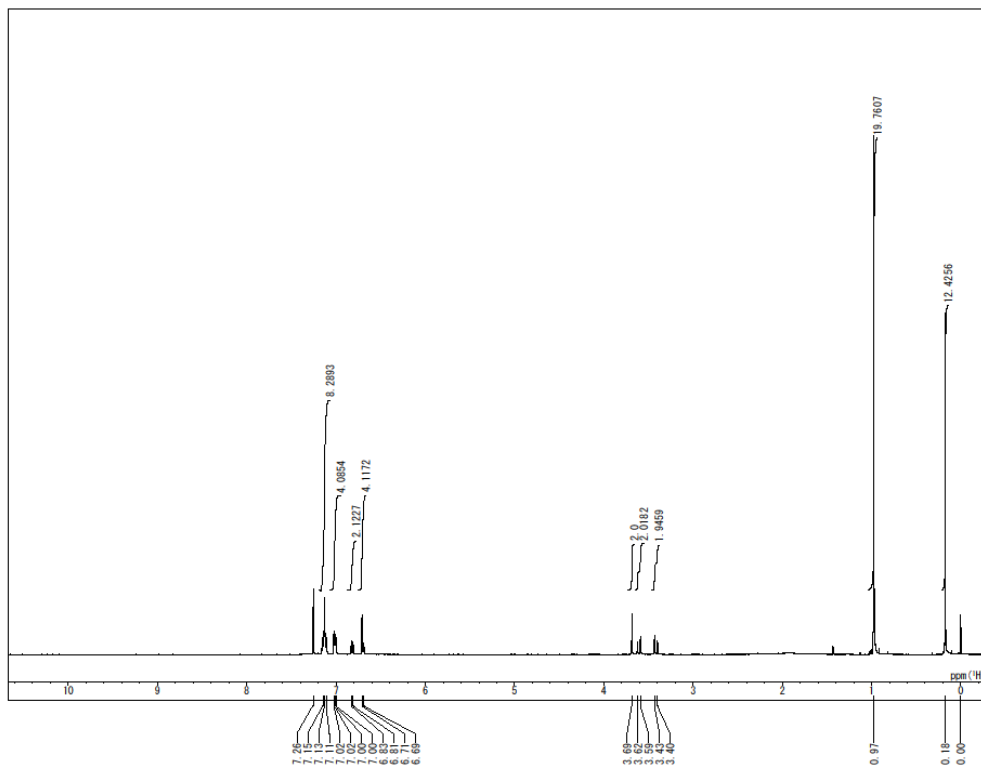

DFILE Y:\INDIVIDUALLY\實驗関連\実験データ  
 ORFFILE Y:\INDIVIDUALLY\實驗関連\実験デー  
 DATUM 19/Jun/2022 16:03:40  
 COMNT  
 OBNUC <sup>1</sup>H  
 OFR 400.13 MHz  
 ORSET 0.0 kHz  
 OFBIN 10021.89 Hz  
 PW1 15.0 μs  
 PW2 15.0 μs  
 PW3 30.0 μs  
 P11 1.0 ms  
 P12 0.0 ms  
 P13 0.0 ms  
 LOOP1 0  
 POINT 32768  
 SCANS 4  
 DUMY 2  
 FREQ 8012.82 Hz  
 ACQM 4.0894 s  
 PD 1.0 s  
 RGAIN 101  
 BF 0.25 Hz  
 EXMOD ZG30  
 IRUC OFF  
 IFR 0.0 MHz  
 IRSET 0.0 kHz  
 IREFIN 0.0 Hz  
 IREFW 0 μs  
 IRATN 0  
 CSPED 20.0 Hz  
 CTEMP 25.91 °C  
 PRINT\_DATE 2022/Jun/21 23:17:41

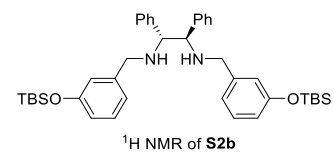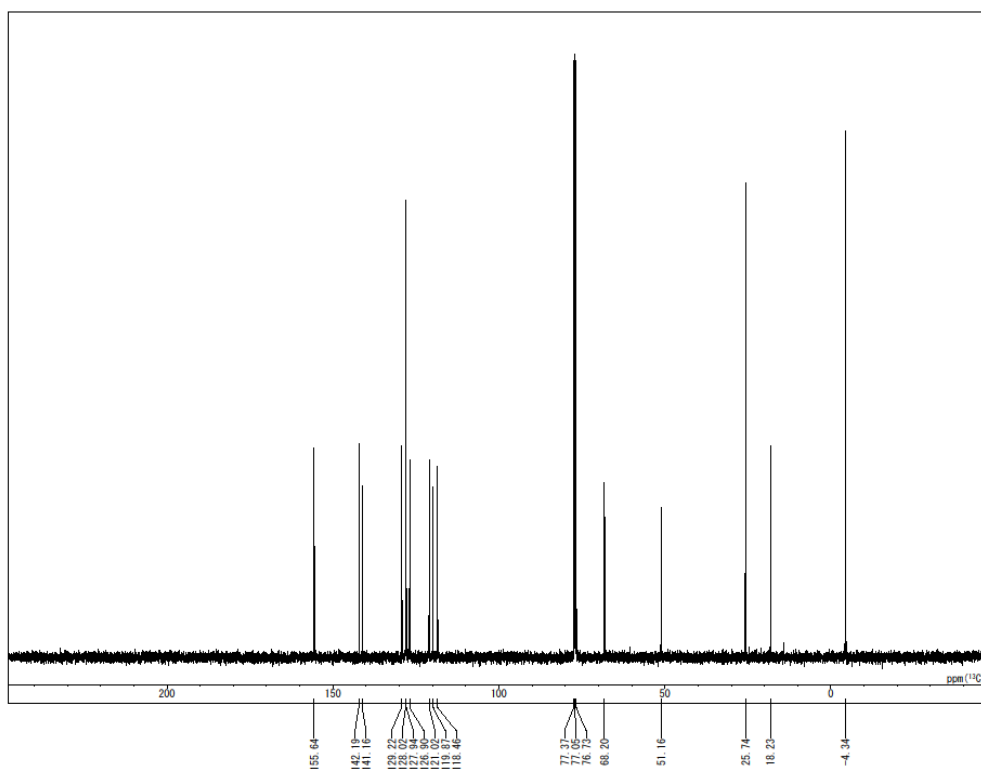

OBNUC <sup>13</sup>C  
 OFR 100.61 MHz  
 ORSET 0.0 kHz  
 OFBIN 9999.159 Hz  
 PW1 10.0 μs  
 PW2 10.0 μs  
 PW3 20.0 μs  
 P11 2.0 ms  
 P12 0.0035 ms  
 P13 0.0 ms  
 LOOP1 0  
 POINT 32768  
 SCANS 256  
 DUMY 2  
 FREQ 29761.9 Hz  
 ACQM 1.191 s  
 PD 2.0 s  
 RGAIN 114  
 BF 0.25 Hz  
 EXMOD ZPG30  
 IRUC OFF  
 IFR 0.0 MHz  
 IRSET 0.0 kHz  
 IREFIN 0.0 Hz  
 IREFW 0 μs  
 IRATN 0  
 CSPED 20.0 Hz  
 CTEMP 22.31 °C  
 PRINT\_DATE 2022/Jun/02 21:33:23

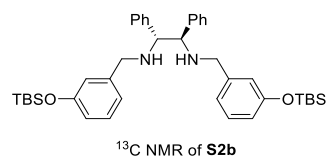

# Supporting Information II

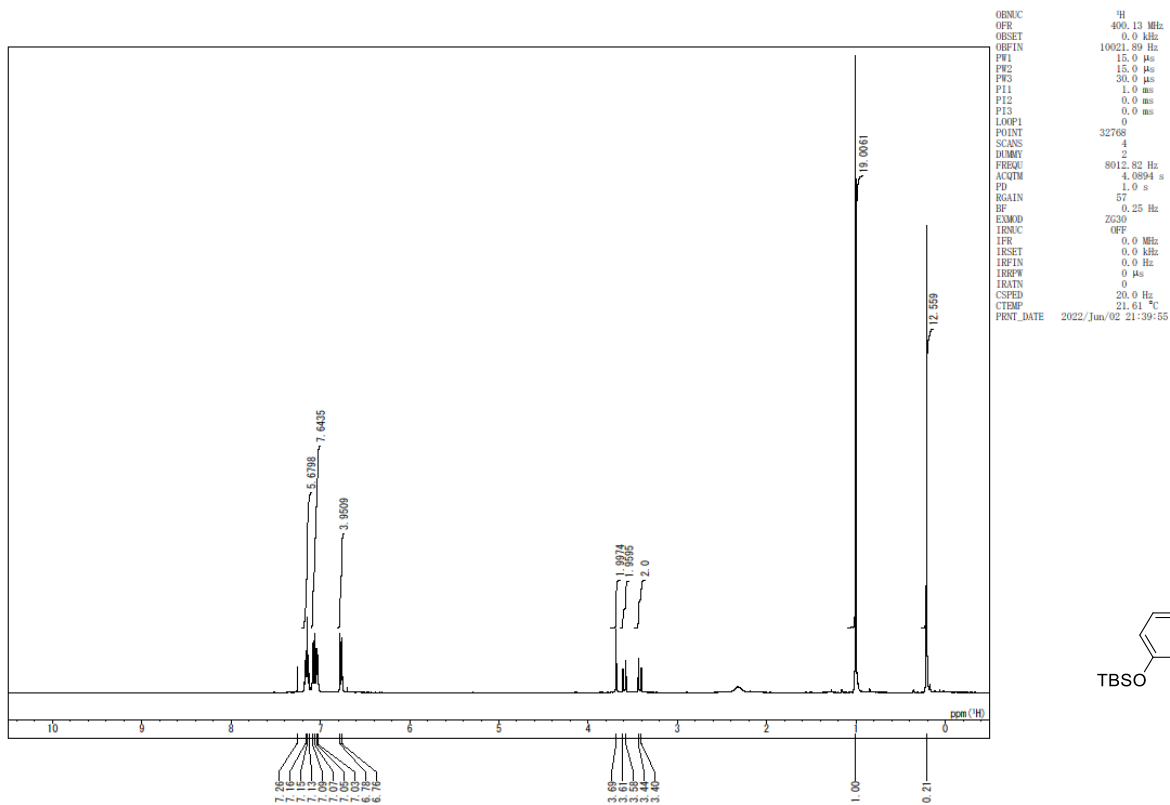

```

OBSUC      400.13 MHz
OFR        400.13 MHz
OBSET      0.0 kHz
OBFIN      10021.89 Hz
PWI        15.0 μs
PWC        15.0 μs
PFS        30.0 μs
P11        1.0 ms
P12        0.0 ms
P13        0.0 ms
LOOP1      0
POINT      32768
SCANS      4
DUMMY      2
FREQ      8012.82 Hz
ACQTM      4.0594 s
PD         1.0 s
RGAIN      57
BF         0.25 Hz
EXMOD      ZG30
IRNUC      OFF
IFR        0.0 MHz
IRSET      0.0 kHz
IRFIN      0.0 Hz
IRBPW      0 μs
IRATN      0
CSFED      20.0 Hz
CTEMP      21.61 °C
PRNT_DATE  2022/Jun/02 21:39:55
    
```

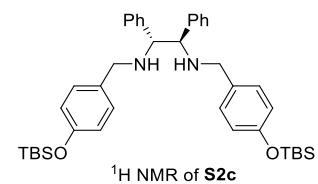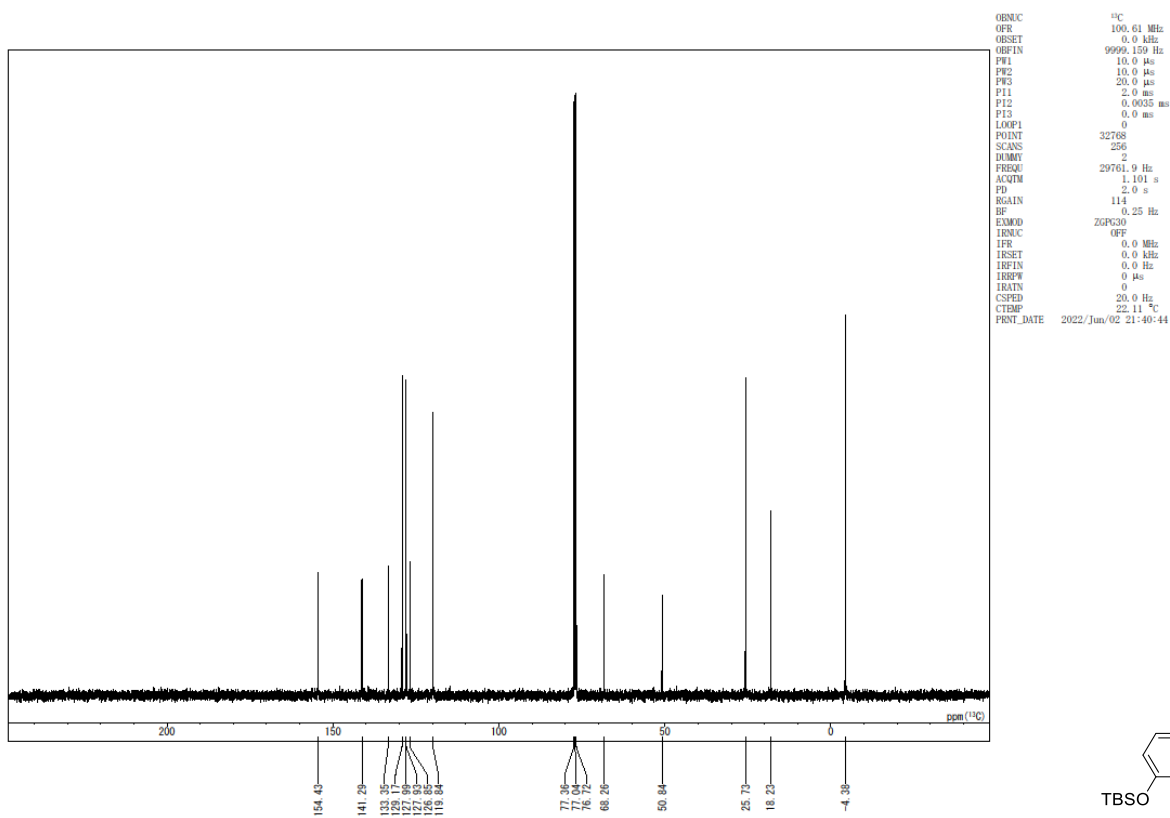

```

OBSUC      100.61 MHz
OFR        100.61 MHz
OBSET      0.0 kHz
OBFIN      9999.159 Hz
PWI        10.0 μs
PWC        10.0 μs
PFS        20.0 μs
P11        2.0 ms
P12        0.0035 ms
P13        0.0 ms
LOOP1      0
POINT      32768
SCANS      256
DUMMY      2
FREQ      29761.9 Hz
ACQTM      1.191 s
PD         2.0 s
RGAIN      114
BF         0.25 Hz
EXMOD      ZGPG30
IRNUC      OFF
IFR        0.0 MHz
IRSET      0.0 kHz
IRFIN      0.0 Hz
IRBPW      0 μs
IRATN      0
CSFED      20.0 Hz
CTEMP      22.11 °C
PRNT_DATE  2022/Jun/02 21:40:44
    
```

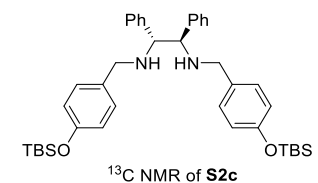

# Supporting Information II

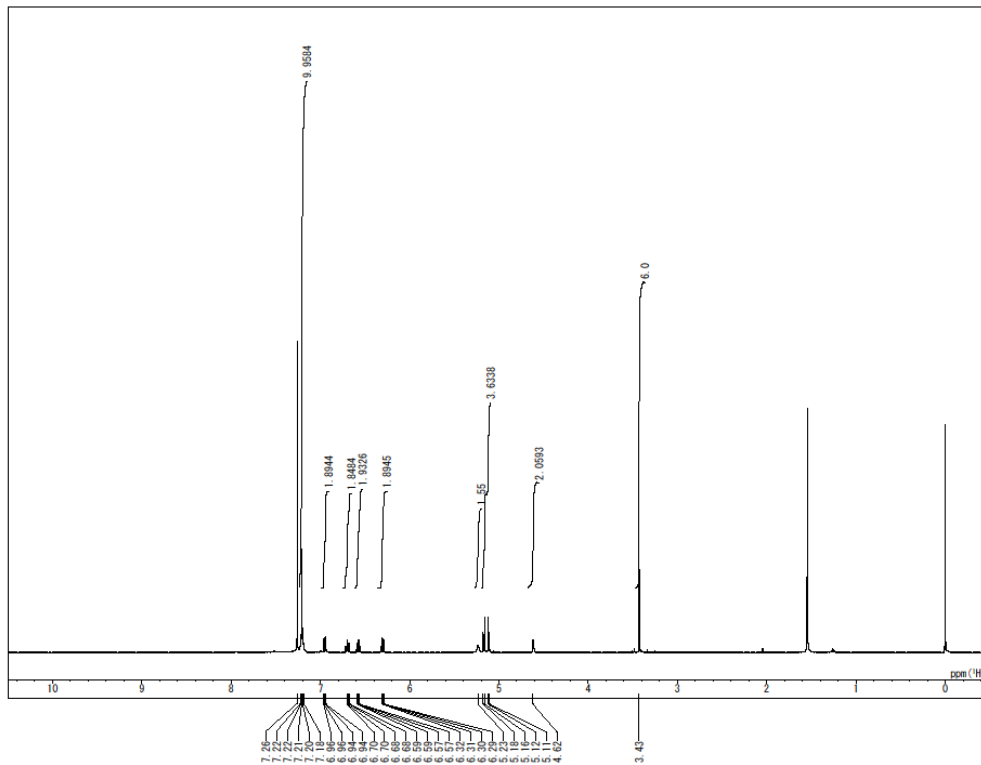

```

OBSUC      400.13 MHz
OFR         0.0 kHz
OBSET      10021.89 Hz
OBFIN      15.0 μs
PW1        15.0 μs
PW2        30.0 μs
PFS        1.0 ms
P11        0.0 ms
P12        0.0 ms
P13        0.0 ms
LOOP1      0
POINT      32768
SCANS      4
DUMY       2
FREQ      8012.82 Hz
ACQTM     4.0894 s
PD         1.0 s
RGAIN     161
BF         0.25 Hz
EMOD      ZG30
IRNUC     OFF
IFR       0.0 MHz
IRSET     0.0 kHz
IRFIN     0.0 Hz
IRPW      0 μs
IRATN     0
CSPEF     20.0 Hz
CTEMP     25.81 °C
PRNT_DATE 2022/Jun/05 18:03:23
    
```

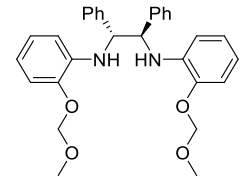

<sup>1</sup>H NMR of S2d

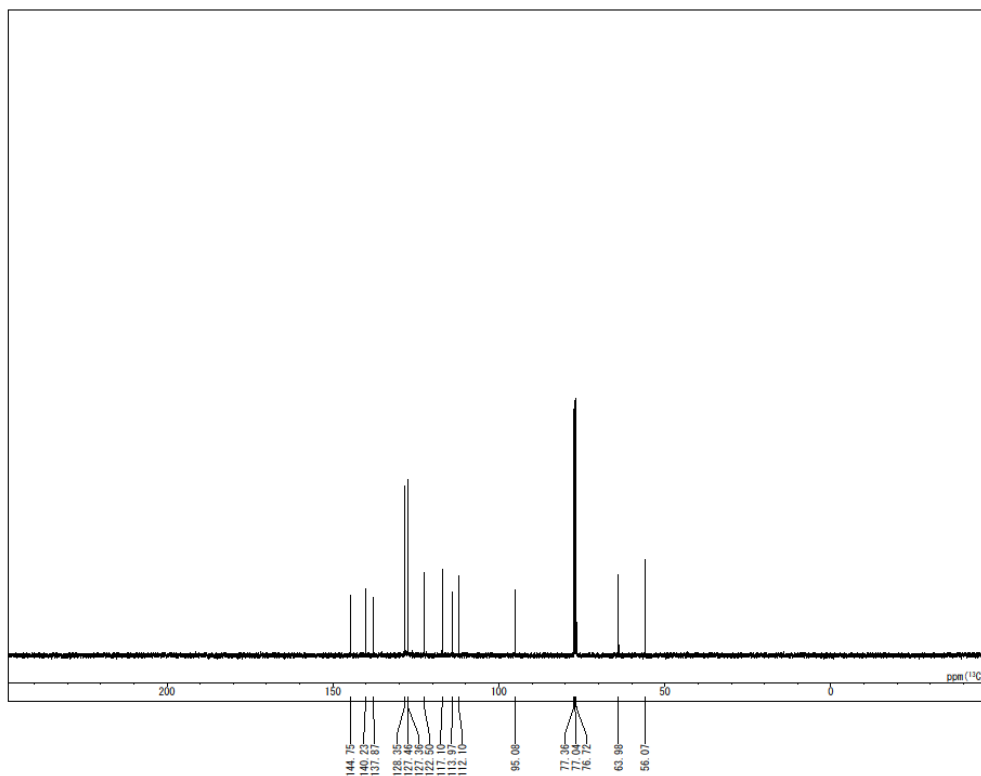

```

OBSUC      100.61 MHz
OFR         0.0 kHz
OBSET      9999.159 Hz
OBFIN      10.0 μs
PW1        10.0 μs
PW2        20.0 μs
PFS        2.0 ms
P11        0.0035 ms
P12        0.0 ms
P13        0.0 ms
LOOP1      0
POINT      32768
SCANS      256
DUMY       2
FREQ      29761.9 Hz
ACQTM     1.191 s
PD         2.0 s
RGAIN     203
BF         0.25 Hz
EMOD      ZGPG30
IRNUC     OFF
IFR       0.0 MHz
IRSET     0.0 kHz
IRFIN     0.0 Hz
IRPW      0 μs
IRATN     0
CSPEF     20.0 Hz
CTEMP     25.81 °C
PRNT_DATE 2022/Jun/05 18:19:51
    
```

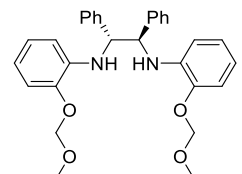

<sup>13</sup>C NMR of S2d

# Supporting Information II

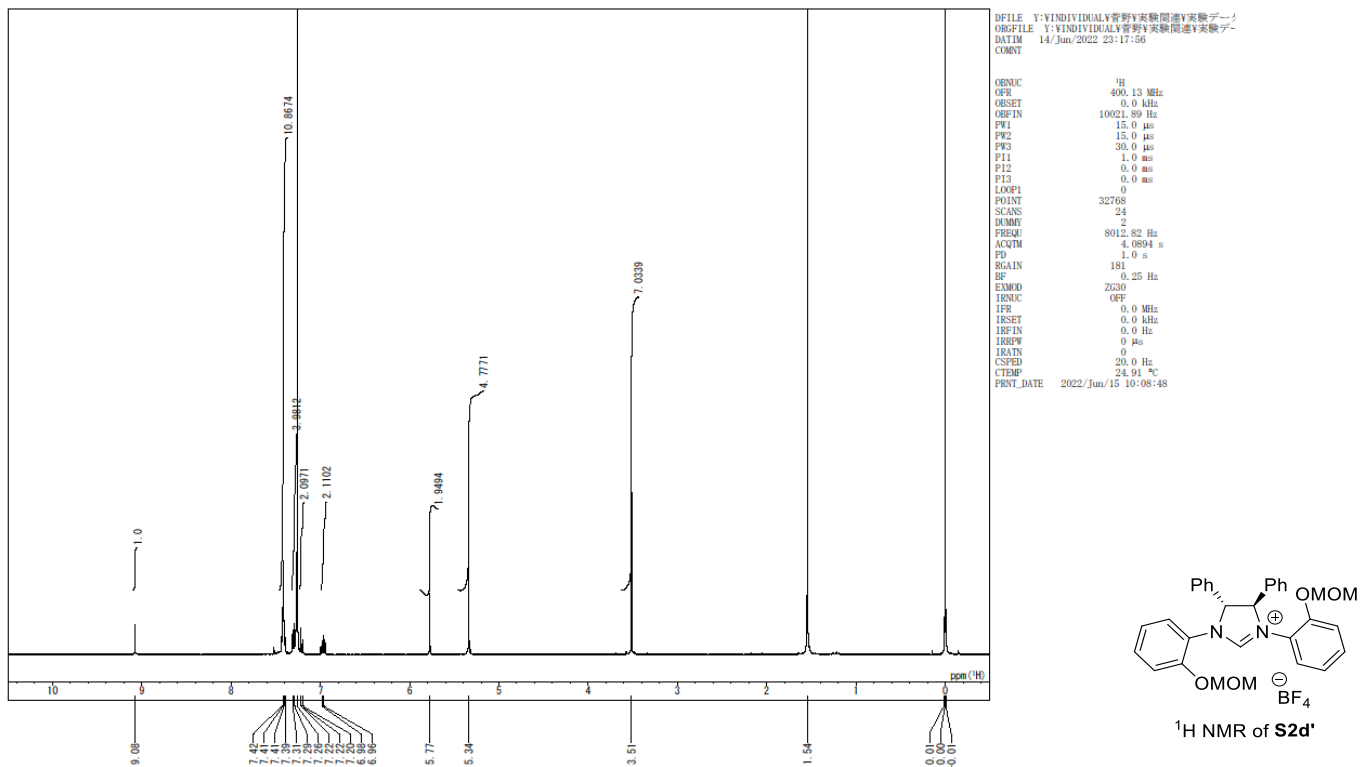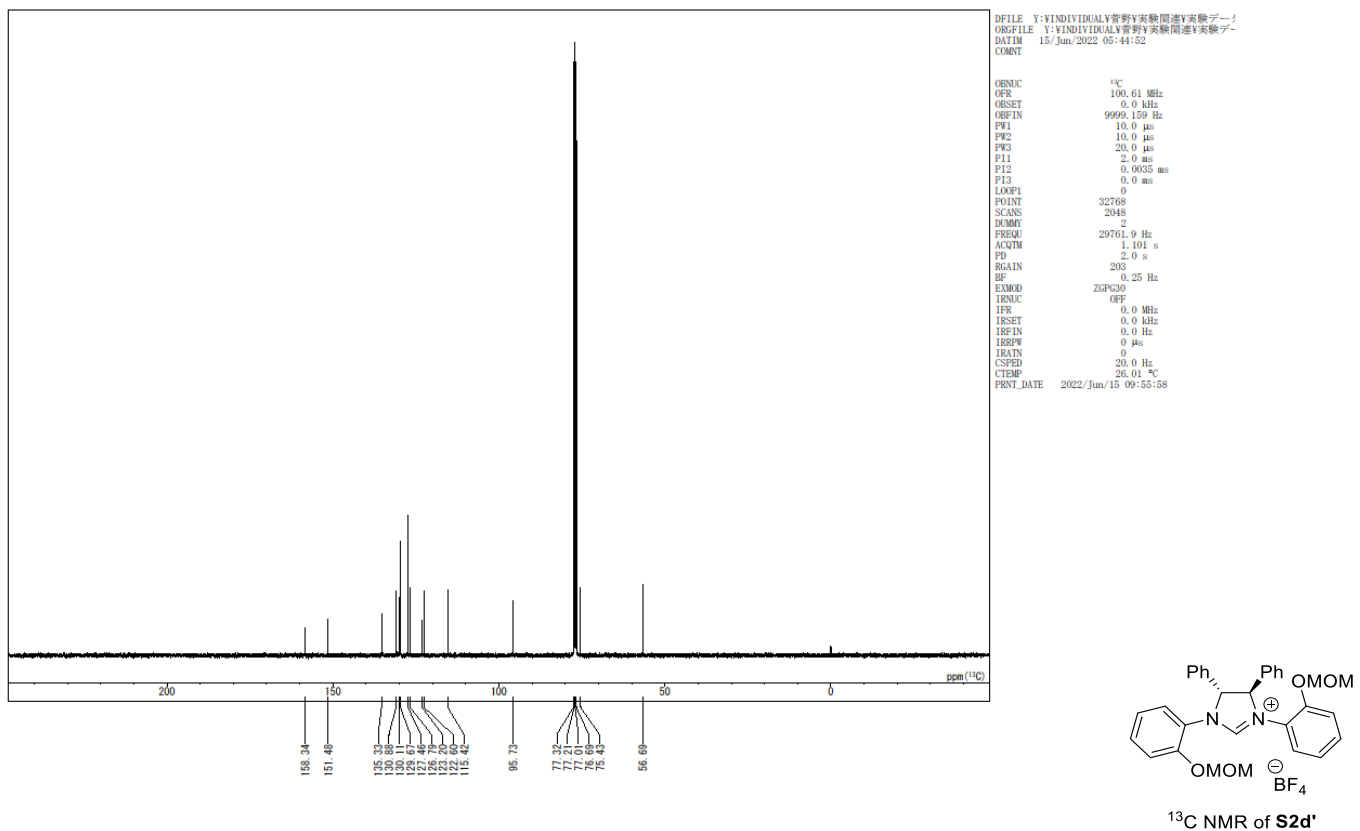

# Supporting Information II

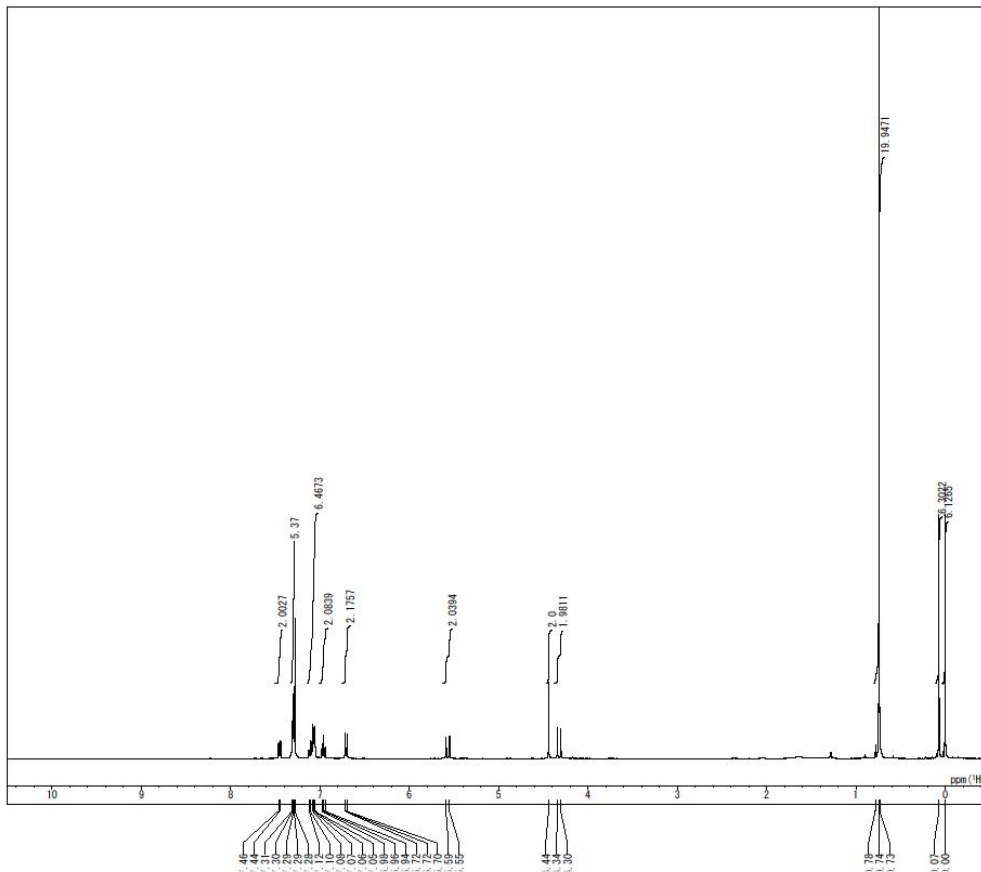

D:\FILE Y:\INDIVIDUAL\Y青野\実験関連\Y実験データ  
 ORGFILE Y:\INDIVIDUAL\Y青野\実験関連\Y実験データ  
 DATIM 18/Jul/2020 00:12:32  
 COMNT  
 ORNUC <sup>1</sup>H  
 OFR 400.13 MHz  
 ORSET 0.0 kHz  
 OFBIN 10021.89 Hz  
 PW1 14.0  $\mu$ s  
 PWC 14.0  $\mu$ s  
 PWS 28.0  $\mu$ s  
 P11 1.0 ms  
 P12 0.0 ms  
 P13 0.0 ms  
 LOOP1 0  
 POINT 32768  
 SCANS 4  
 DUMMY 2  
 FREQ 8012.82 Hz  
 ACQIM 4.0894 s  
 PD 1.0 s  
 RGAIN 64  
 BF 0.25 Hz  
 EXMOD ZG30  
 IRNUC OFF  
 IFR 0.0 MHz  
 IRSET 0.0 kHz  
 IRFIN 0.0 Hz  
 IREFW 0  $\mu$ s  
 IRATN 0  
 CSPED 20.0 Hz  
 CTMP 23.81  $^{\circ}$ C  
 PRNT\_DATE 2022/Jun/02 10:45:21

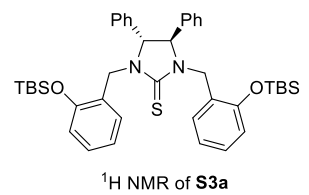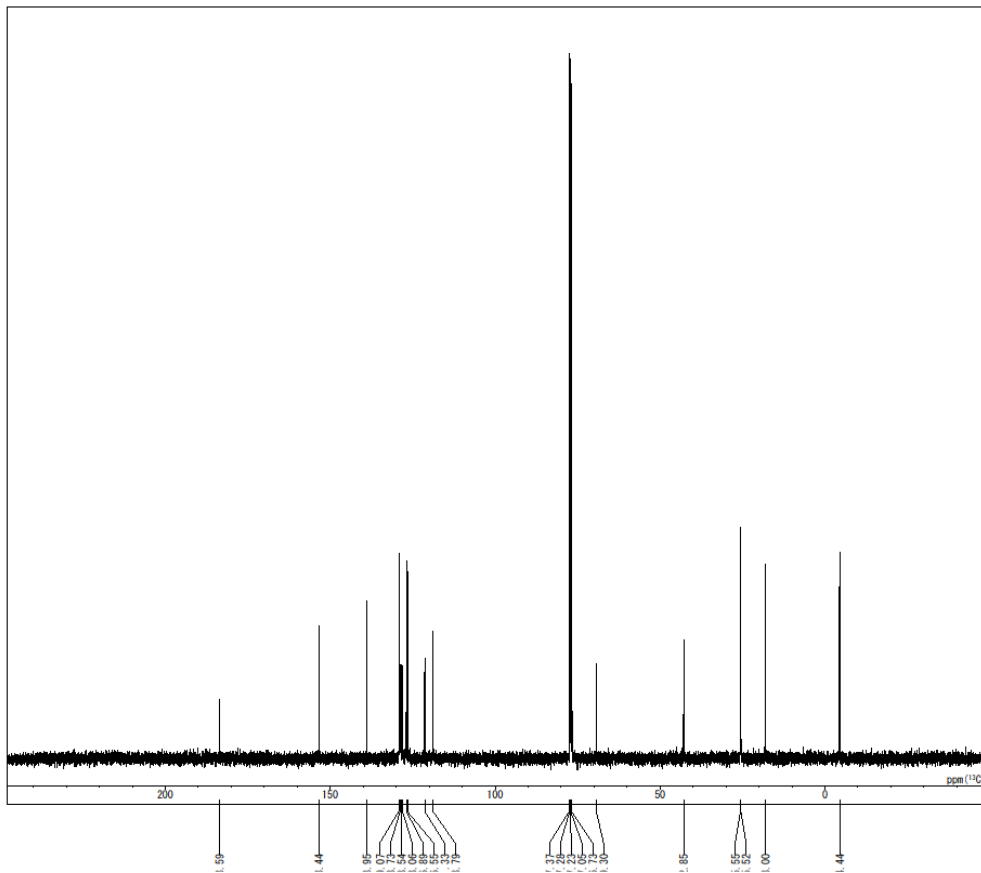

D:\FILE Y:\INDIVIDUAL\Y青野\実験関連\Y実験データ  
 ORGFILE Y:\INDIVIDUAL\Y青野\実験関連\Y実験データ  
 DATIM 18/Jul/2020 00:27:41  
 COMNT  
 ORNUC <sup>13</sup>C  
 OFR 100.61 MHz  
 ORSET 0.0 kHz  
 OFBIN 9999.159 Hz  
 PW1 8.6  $\mu$ s  
 PWC 8.6  $\mu$ s  
 PWS 17.2  $\mu$ s  
 P11 2.0 ms  
 P12 0.0035 ms  
 P13 0.0 ms  
 LOOP1 0  
 POINT 32768  
 SCANS 256  
 DUMMY 2  
 FREQ 29761.9 Hz  
 ACQIM 1.101 s  
 PD 2.0 s  
 RGAIN 161  
 BF 0.25 Hz  
 EXMOD ZPG30  
 IRNUC OFF  
 IFR 0.0 MHz  
 IRSET 0.0 kHz  
 IRFIN 0.0 Hz  
 IREFW 0  $\mu$ s  
 IRATN 0  
 CSPED 20.0 Hz  
 CTMP 23.81  $^{\circ}$ C  
 PRNT\_DATE 2022/Jun/02 11:05:50

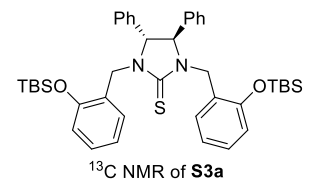

# Supporting Information II

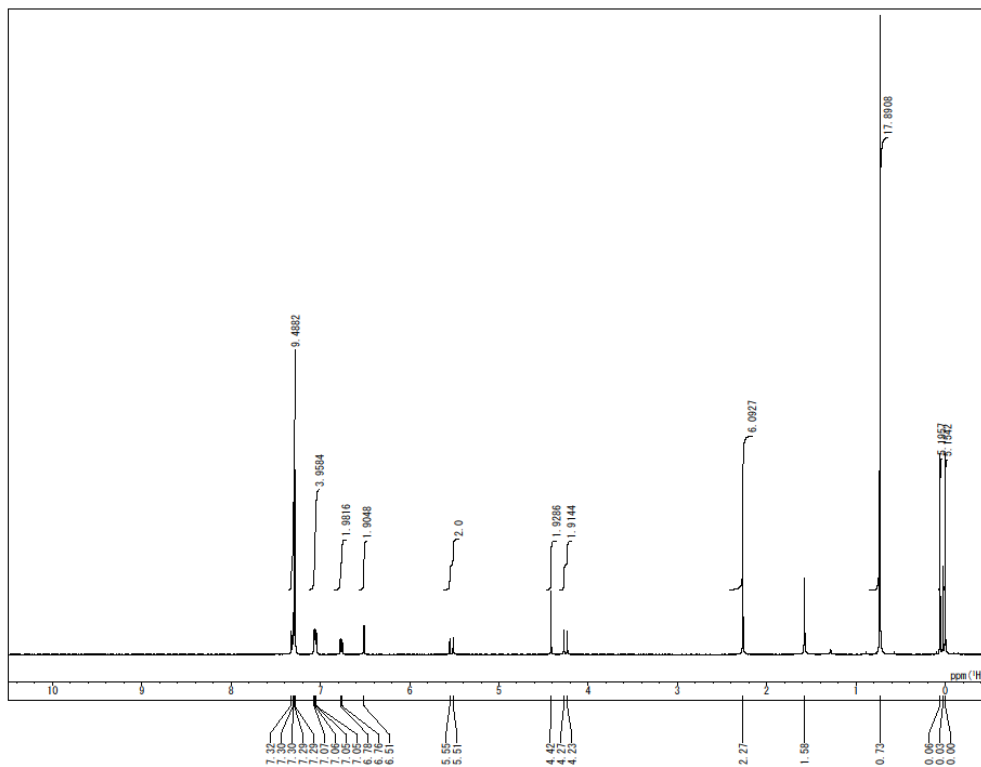

D:\FILE Y:\INDIVIDUALLY\菅野Y実験関連\Y実験デー  
 ORF\FILE Y:\INDIVIDUALLY\菅野Y実験関連\Y実験デー  
 DATIM 09/Jun/2022 15:02:44  
 COMNT  
 ORNUC <sup>1</sup>H  
 OFR 400.13 MHz  
 ORSET 0.0 kHz  
 OFBIN 10021.89 Hz  
 PW1 15.0 μs  
 PW2 15.0 μs  
 PW3 30.0 μs  
 P11 1.0 ms  
 P12 0.0 ms  
 P13 0.0 ms  
 LOOP1 0  
 POINT 32768  
 SCANS 4  
 DOMM 2  
 FREQ 8012.32 Hz  
 ACQTM 4.0894 s  
 PD 1.0 s  
 RGAIN 128  
 BF 0.25 Hz  
 EXMOD ZG30  
 TRUC OFF  
 IFR 0.0 MHz  
 IRSET 0.0 kHz  
 IREFIN 0.0 Hz  
 IRRPW 0 μs  
 IRATN 0  
 CSFD 20.0 Hz  
 CTEMP 25.51 °C  
 PRNT\_DATE 2022/Jun/09 15:27:08

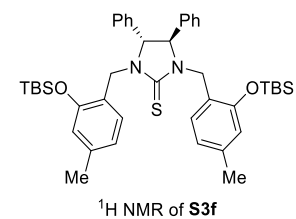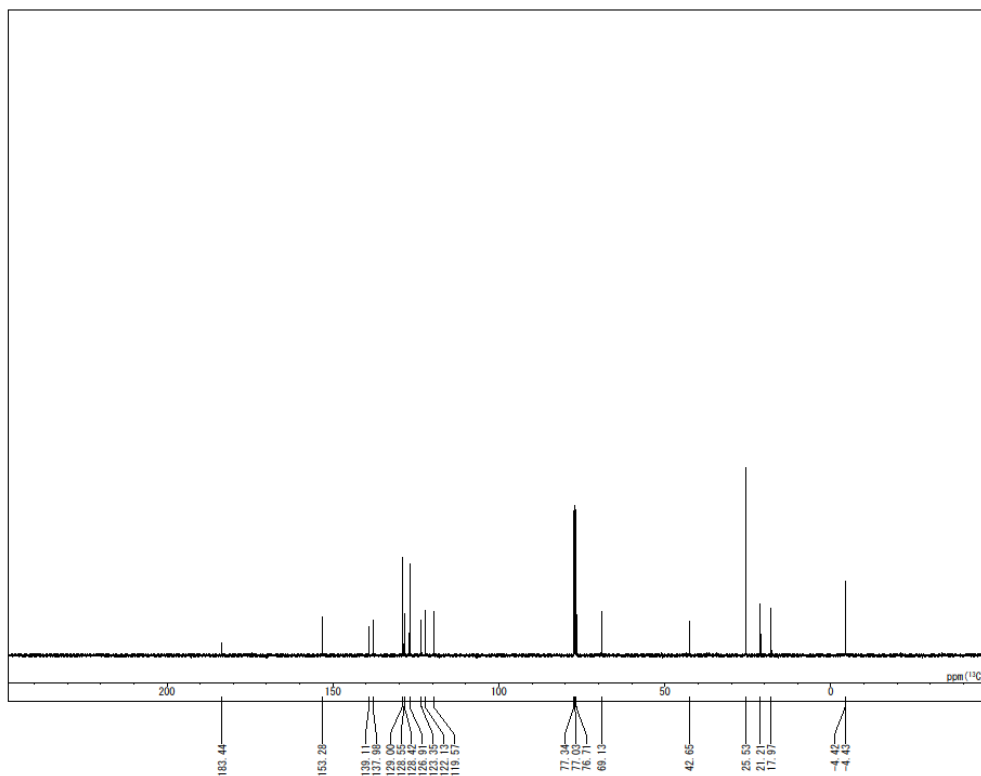

D:\FILE Y:\INDIVIDUALLY\菅野Y実験関連\Y実験デー  
 ORF\FILE Y:\INDIVIDUALLY\菅野Y実験関連\Y実験デー  
 DATIM 09/Jun/2022 16:16:29  
 COMNT  
 ORNUC <sup>13</sup>C  
 OFR 100.61 MHz  
 ORSET 0.0 kHz  
 OFBIN 9999.159 Hz  
 PW1 10.0 μs  
 PW2 10.0 μs  
 PW3 20.0 μs  
 P11 2.0 ms  
 P12 0.0035 ms  
 P13 0.0 ms  
 LOOP1 0  
 POINT 32768  
 SCANS 256  
 DOMM 2  
 FREQ 29761.9 Hz  
 ACQTM 1.101 s  
 PD 2.0 s  
 RGAIN 203  
 BF 0.25 Hz  
 EXMOD ZGPG30  
 TRUC OFF  
 IFR 0.0 MHz  
 IRSET 0.0 kHz  
 IREFIN 0.0 Hz  
 IRRPW 0 μs  
 IRATN 0  
 CSFD 20.0 Hz  
 CTEMP 26.41 °C  
 PRNT\_DATE 2022/Jun/09 16:23:22

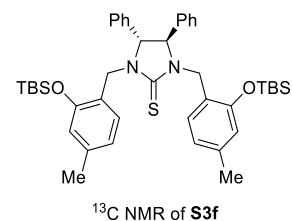

# Supporting Information II

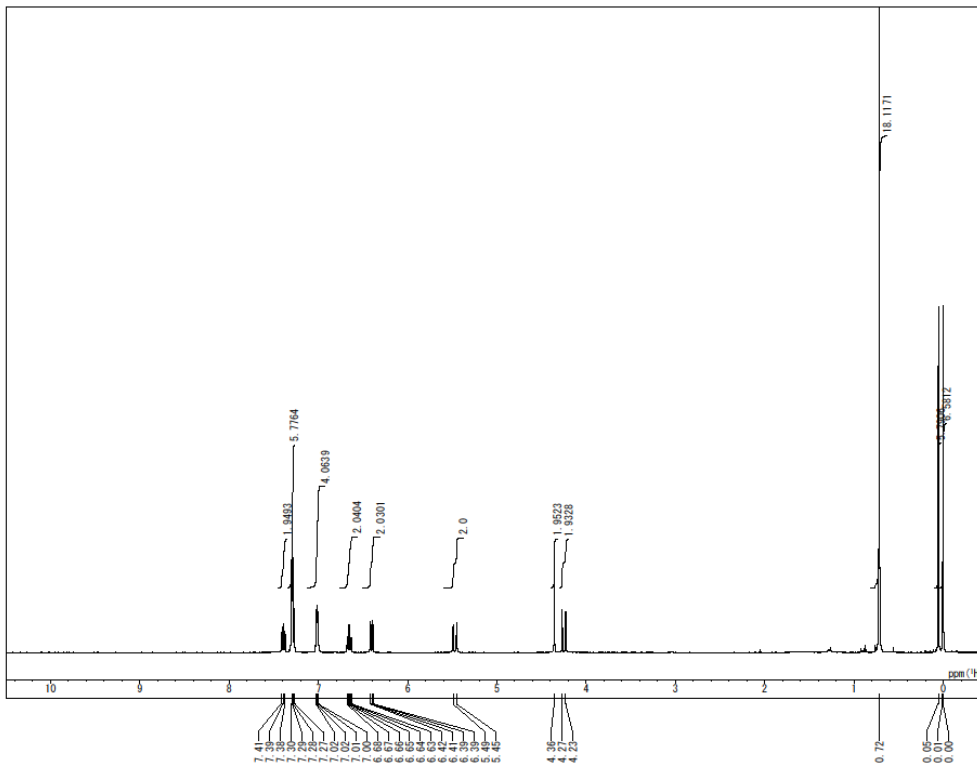

DFILE Y:\INDIVIDUALLY\菅野Y実験関連\Y実験データ  
 ORFFILE Y:\INDIVIDUALLY\菅野Y実験関連\Y実験データ  
 DATIM 01/Mar/2021 02:59:19  
 COMBT  
 ORNUC <sup>1</sup>H  
 OFR 400.13 MHz  
 ORSET 0.0 kHz  
 OFBIN 10021.89 Hz  
 PW1 15.0 μs  
 PW2 15.0 μs  
 PW3 30.0 μs  
 P11 1.0 ms  
 P12 0.0 ms  
 P13 0.0 ms  
 LOOP1 0  
 POINT 32768  
 SCANS 4  
 DUMBY 2  
 FREQU 8012.82 Hz  
 ACQTM 4.0894 s  
 PD 1.0 s  
 RGAIN 81  
 BF 0.1223 Hz  
 EXMOD ZG30  
 INUC OFF  
 IFR 0.0 MHz  
 IRSET 0.0 kHz  
 IRFIN 0.0 Hz  
 IRPW 0 μs  
 IRATN 0  
 CSPED 20.0 Hz  
 CTEMP 21.91 °C  
 PRNT\_DATE 2022/Jun/22 00:17:31

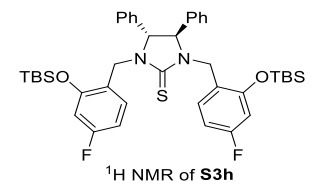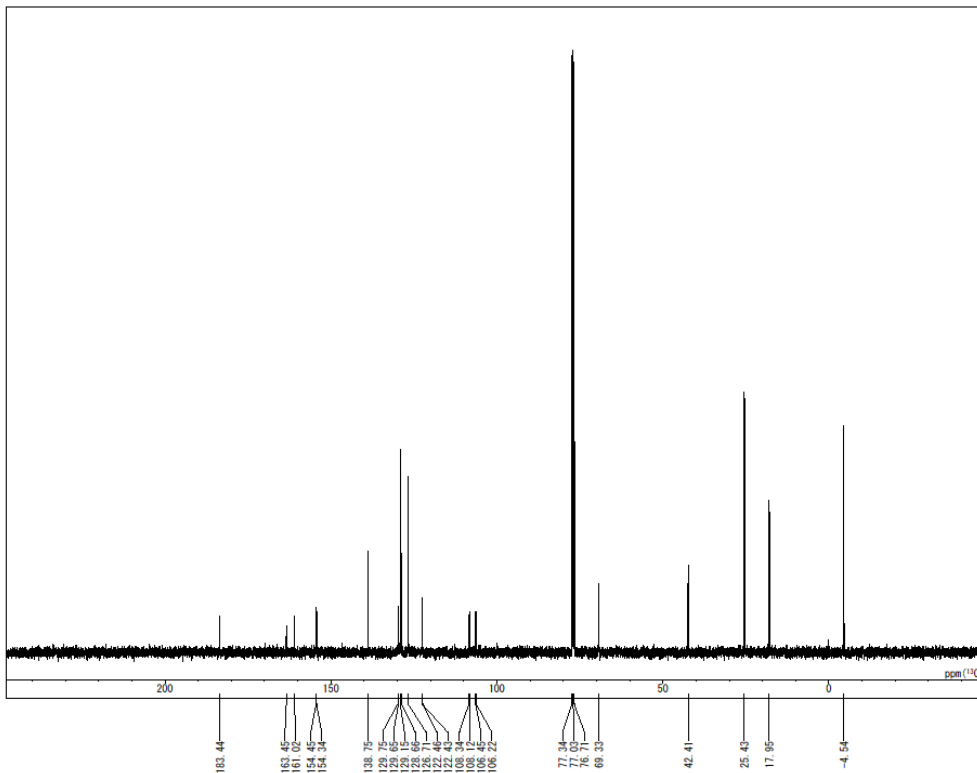

DFILE Y:\INDIVIDUALLY\菅野Y実験関連\Y実験データ  
 ORFFILE Y:\INDIVIDUALLY\菅野Y実験関連\Y実験データ  
 DATIM 01/Mar/2021 02:24:33  
 COMBT  
 ORNUC <sup>13</sup>C  
 OFR 100.61 MHz  
 ORSET 0.0 kHz  
 OFBIN 9999.159 Hz  
 PW1 10.0 μs  
 PW2 10.0 μs  
 PW3 20.0 μs  
 P11 2.0 ms  
 P12 0.0035 ms  
 P13 0.0 ms  
 LOOP1 0  
 POINT 32768  
 SCANS 256  
 DUMBY 2  
 FREQU 29761.9 Hz  
 ACQTM 1.101 s  
 PD 2.0 s  
 RGAIN 114  
 BF 0.4541 Hz  
 EXMOD ZFG30  
 INUC OFF  
 IFR 0.0 MHz  
 IRSET 0.0 kHz  
 IRFIN 0.0 Hz  
 IRPW 0 μs  
 IRATN 0  
 CSPED 20.0 Hz  
 CTEMP 22.41 °C  
 PRNT\_DATE 2022/Jun/22 00:17:00

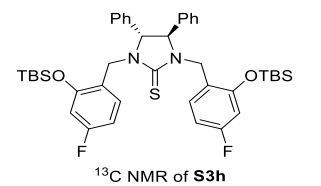



# Supporting Information II

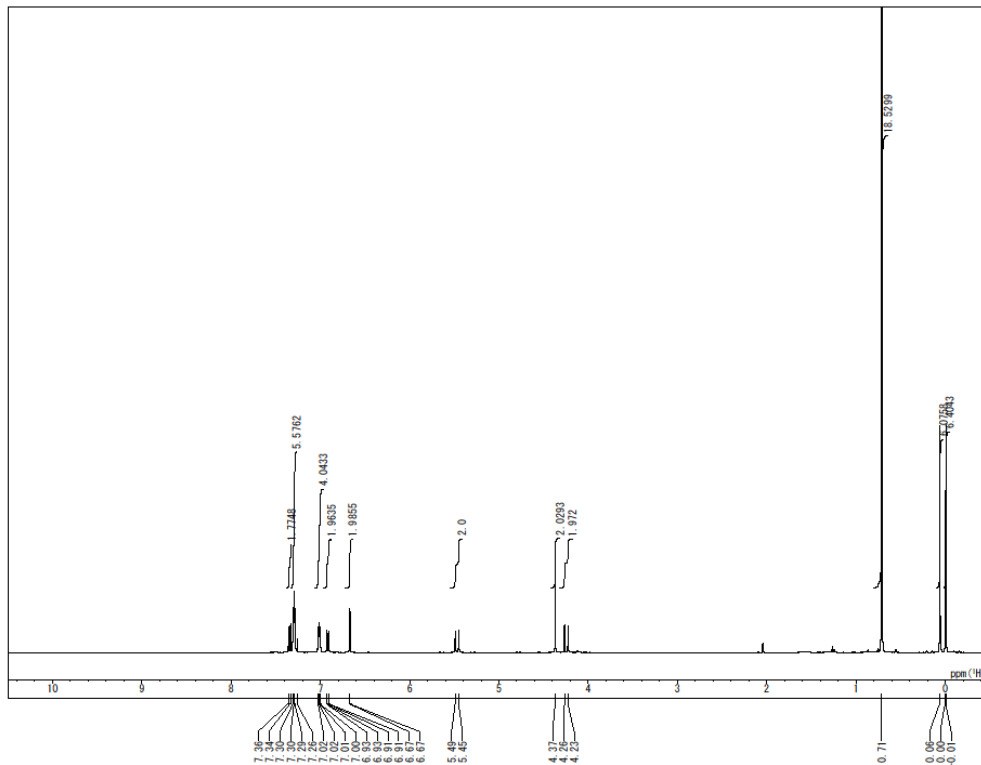

```

OBSUC      400.13 MHz
OPR        400.13 MHz
OBSET      0.0 kHz
OBSFV      10021.89 Hz
OBSF1      15.0 µs
PWC        15.0 µs
PWS        30.0 µs
P11        1.0 ms
P12        0.0 ms
P13        0.0 ms
LOOP1      0
POINT      32768
SCANS      4
DUMY       2
FREQ      8012.82 Hz
ACQTM      4.0594 s
PD         1.0 s
RGAIN      57
BF         0.25 Hz
EXMOD      ZG30
IRNUC      OFF
IFR        0.0 MHz
IRSET      0.0 kHz
IRFIN      0.0 Hz
IRPW       0 µs
IRATN      0
CSPEP      20.0 Hz
CTEMP      21.91 °C
PRNT_DATE  2022/Jun/02 23:05:44
    
```

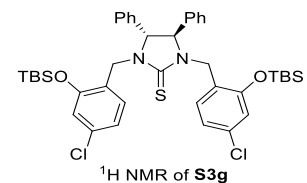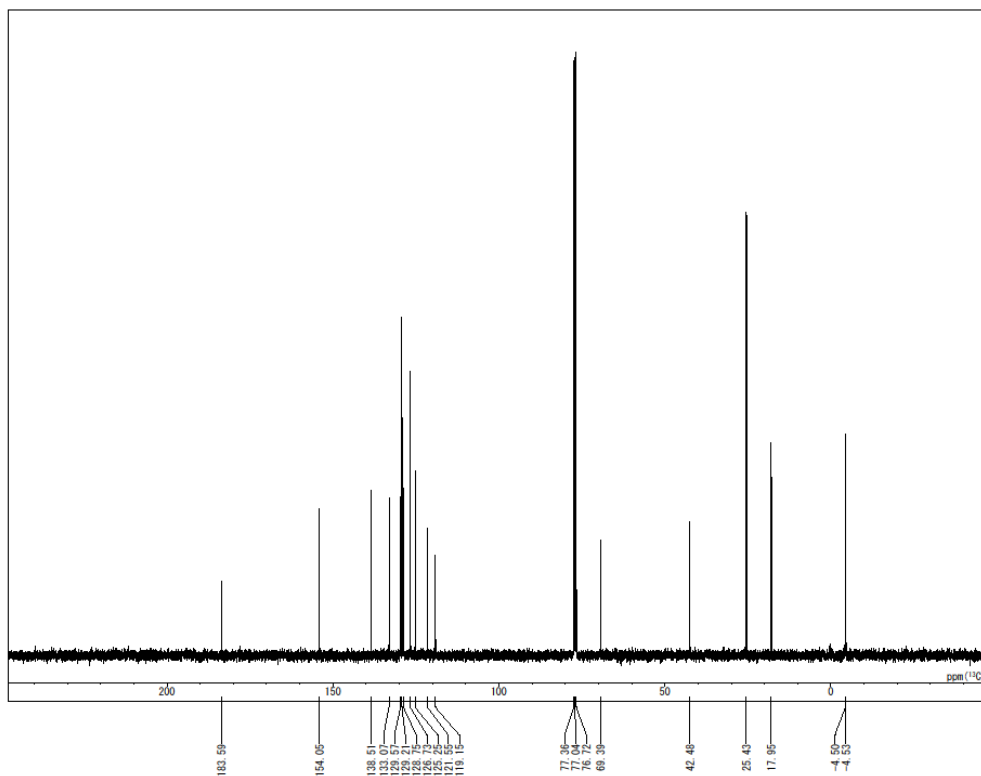

```

OBSUC      100.61 MHz
OPR        100.61 MHz
OBSET      0.0 kHz
OBSFV      9999.159 Hz
OBSF1      10.0 µs
PWC        10.0 µs
PWS        20.0 µs
P11        2.0 ms
P12        0.0035 ms
P13        0.0 ms
LOOP1      0
POINT      32768
SCANS      256
DUMY       2
FREQ      29761.9 Hz
ACQTM      1.191 s
PD         2.0 s
RGAIN      203
BF         0.25 Hz
EXMOD      ZGPG30
IRNUC      OFF
IFR        0.0 MHz
IRSET      0.0 kHz
IRFIN      0.0 Hz
IRPW       0 µs
IRATN      0
CSPEP      20.0 Hz
CTEMP      22.51 °C
PRNT_DATE  2022/Jun/02 23:03:15
    
```

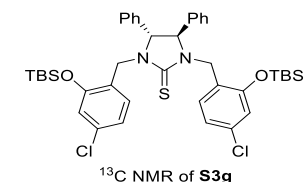

# Supporting Information II

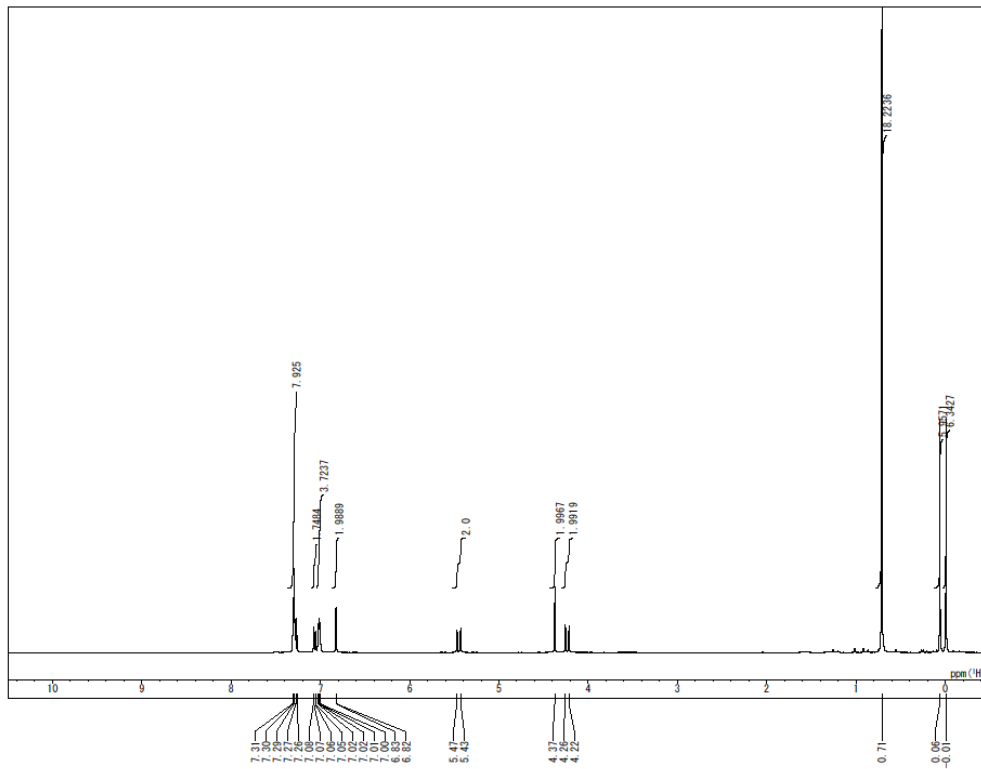

```

OBSUC      400.13 MHz
OFR        0.0 kHz
OBSET     10021.89 Hz
OBFIN
PWI       15.0 µs
PWC       15.0 µs
PFS       30.0 µs
P11       1.0 ms
P12       0.0 ms
P13       0.0 ms
LOOP1     0
POINT     32768
SCANS     4
DUMMY     2
FREQ     8012.82 Hz
ACQTM     4.0894 s
PD        1.0 s
RGAIN     51
BF        0.25 Hz
EMOD      ZG30
IRNUC     OFF
IFR       0.0 MHz
IRSET     0.0 kHz
IRFIN     0.0 Hz
IRBPW     0 µs
IRATN     0
CSPED     20.0 Hz
CTEMP     22.01 °C
PRNT_DATE 2022/Jun/02 23:10:53
    
```

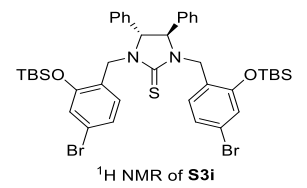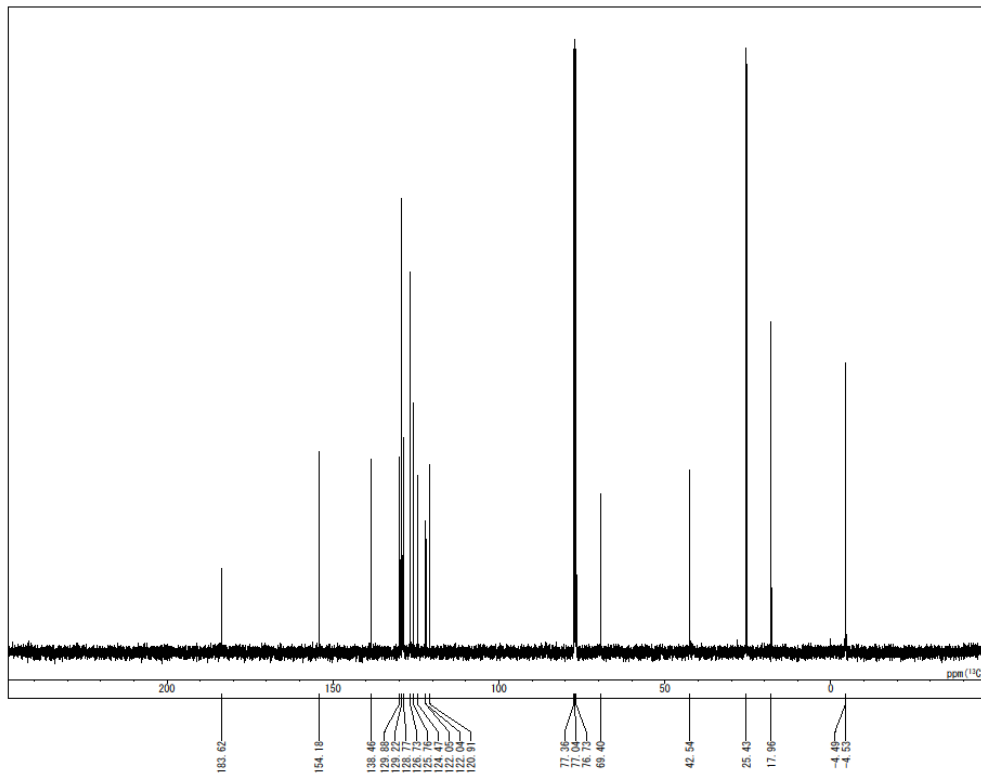

```

OBSUC      100.61 MHz
OFR        0.0 kHz
OBSET     9999.159 Hz
OBFIN
PWI       10.0 µs
PWC       10.0 µs
PFS       20.0 µs
P11       2.0 ms
P12       0.0035 ms
P13       0.0 ms
LOOP1     0
POINT     32768
SCANS     256
DUMMY     2
FREQ     29761.9 Hz
ACQTM     1.191 s
PD        2.0 s
RGAIN     203
BF        0.25 Hz
EMOD      ZGPG30
IRNUC     OFF
IFR       0.0 MHz
IRSET     0.0 kHz
IRFIN     0.0 Hz
IRBPW     0 µs
IRATN     0
CSPED     20.0 Hz
CTEMP     22.41 °C
PRNT_DATE 2022/Jun/02 23:08:53
    
```

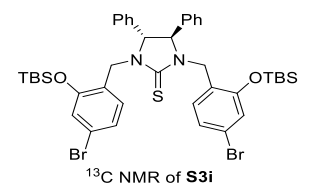

# Supporting Information II

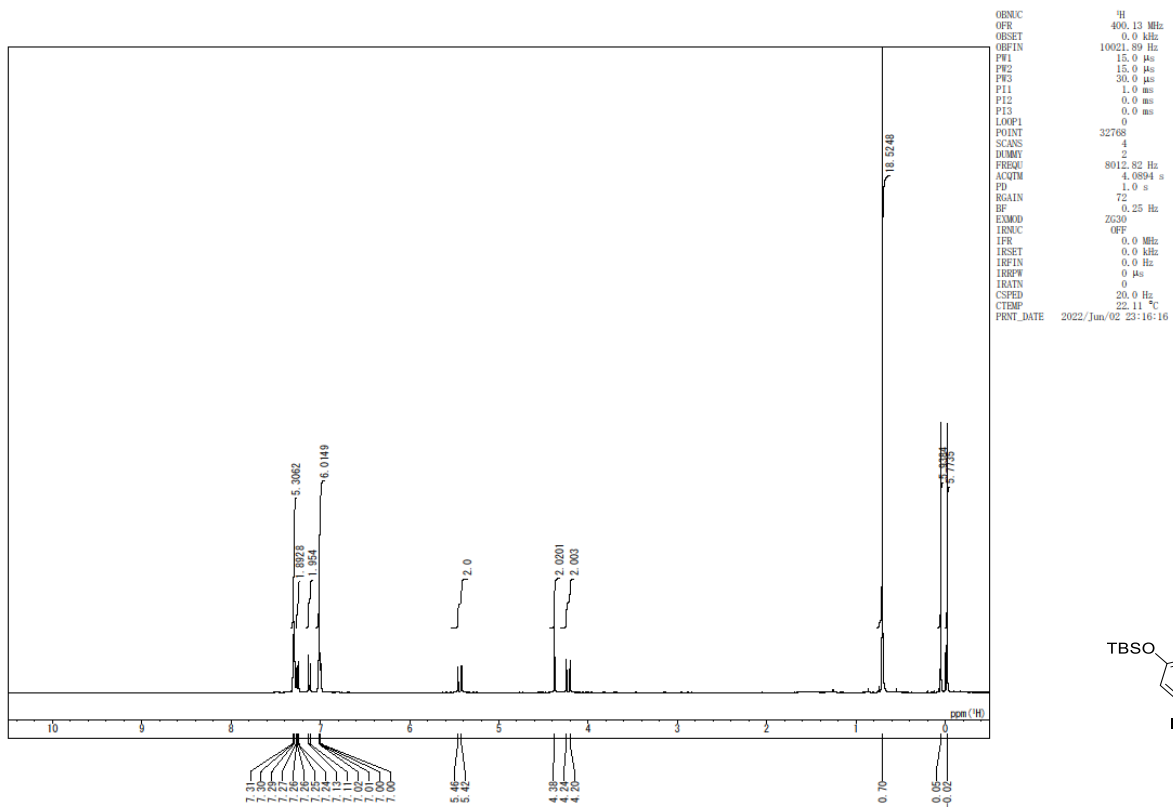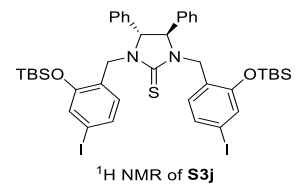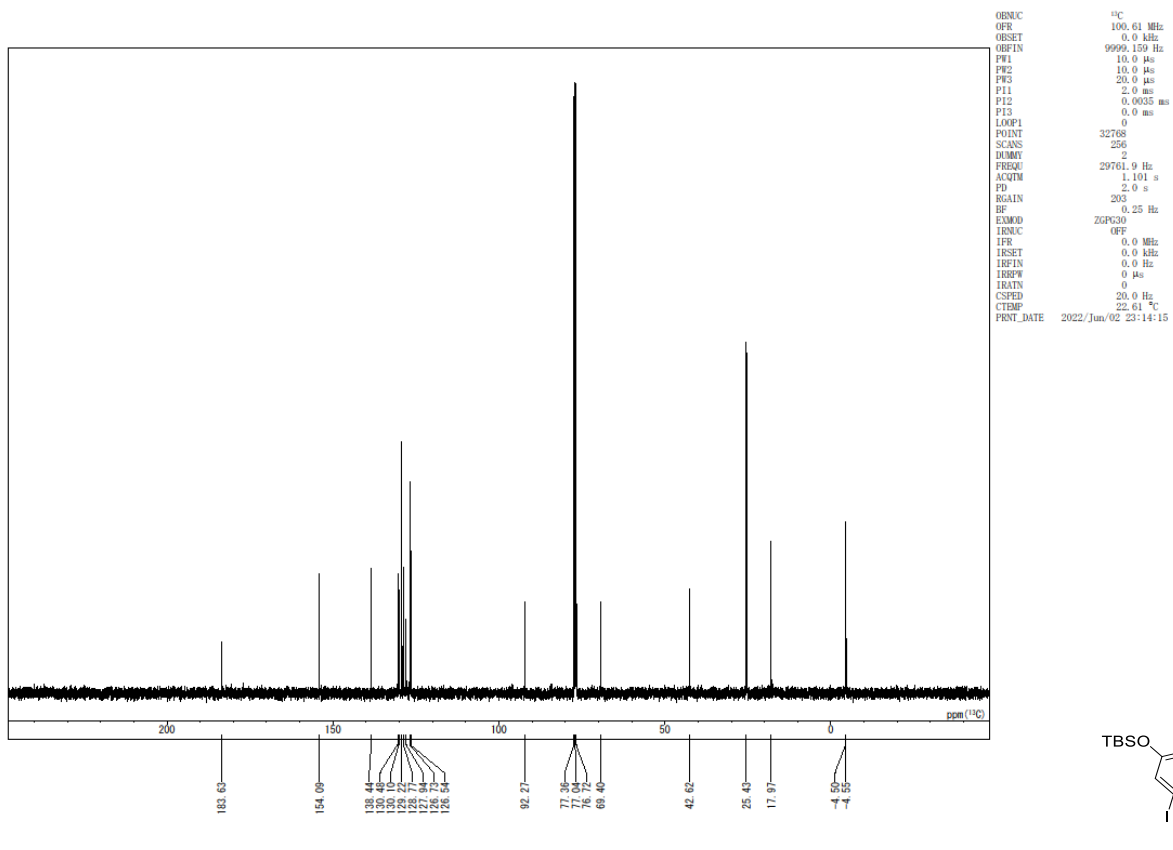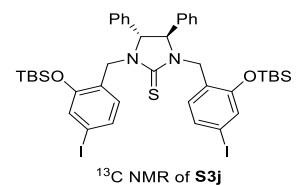

# Supporting Information II

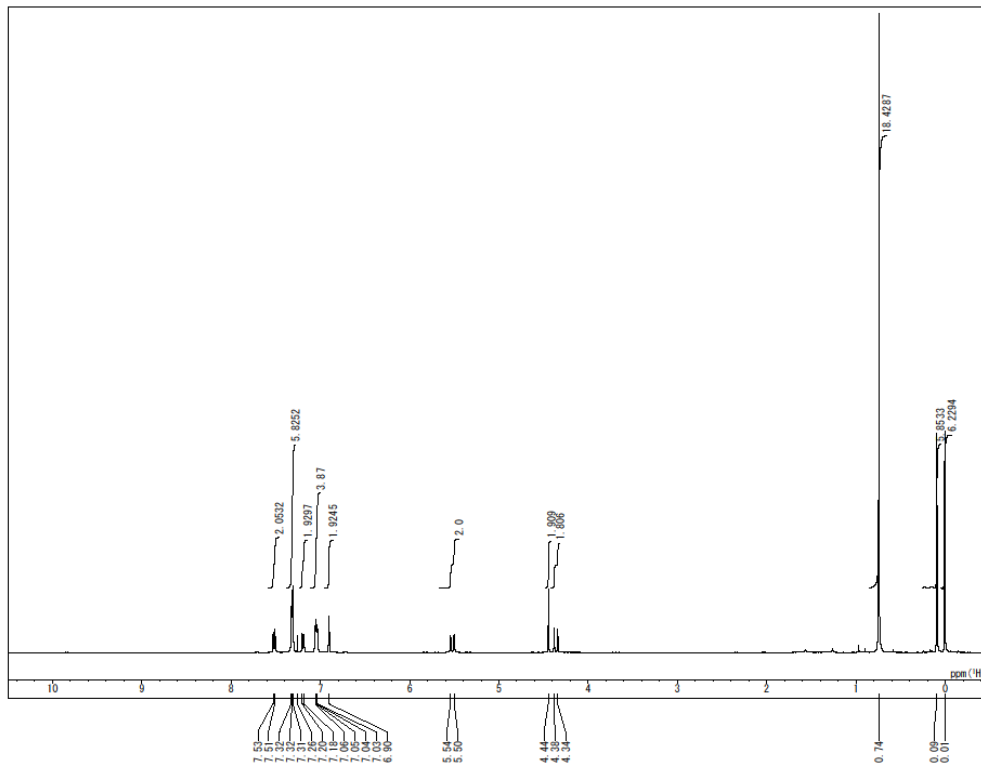

```

OBSUC      400.13 MHz
OFR        0.0 kHz
OBSET      10021.89 Hz
OBFIN      15.0 µs
PW1        15.0 µs
PW2        30.0 µs
PFS        1.0 ms
P11        0.0 ms
P12        0.0 ms
P13        0.0 ms
LOOP1      0
POINT      32768
SCANS      4
DUMMY      2
FREQ      8012.82 Hz
ACQTM      4.0594 s
PD         1.0 s
RGAIN      57
BF         0.25 Hz
EMOD       ZG30
IRNUC      OFF
IFR        0.0 MHz
IRSET      0.0 kHz
IRFIN      0.0 Hz
IRPW       0 µs
IRATN      0
CSPED      20.0 Hz
CTEMP      22.41 °C
PRNT_DATE  2022/Jun/02 23:20:56
    
```

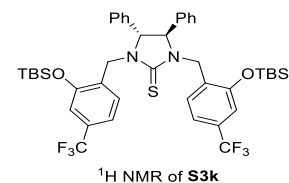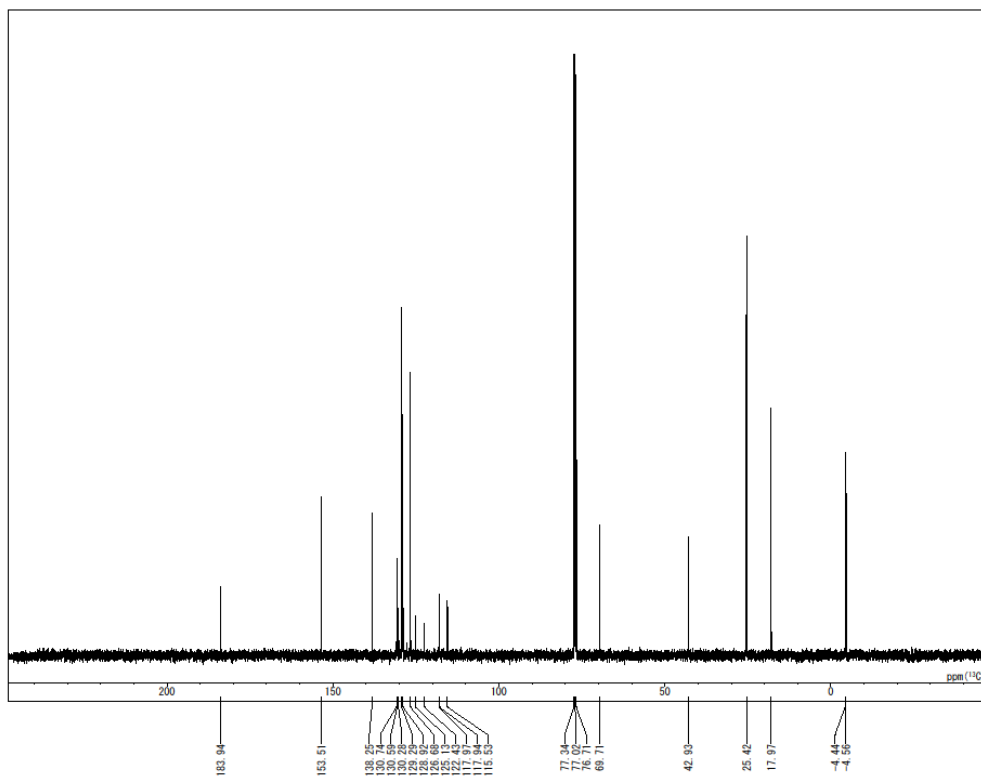

```

OBSUC      100.61 MHz
OFR        0.0 kHz
OBSET      9999.159 Hz
OBFIN      10.0 µs
PW1        10.0 µs
PW2        20.0 µs
PFS        2.0 ms
P11        0.0035 ms
P12        0.0 ms
P13        0.0 ms
LOOP1      0
POINT      32768
SCANS      256
DUMMY      2
FREQ      29761.9 Hz
ACQTM      1.191 s
PD         2.0 s
RGAIN      181
BF         0.25 Hz
EMOD       ZGPG30
IRNUC      OFF
IFR        0.0 MHz
IRSET      0.0 kHz
IRFIN      0.0 Hz
IRPW       0 µs
IRATN      0
CSPED      20.0 Hz
CTEMP      22.41 °C
PRNT_DATE  2022/Jun/02 23:18:47
    
```

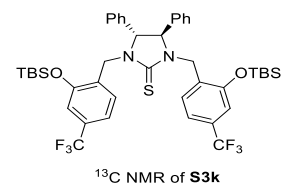

# Supporting Information II

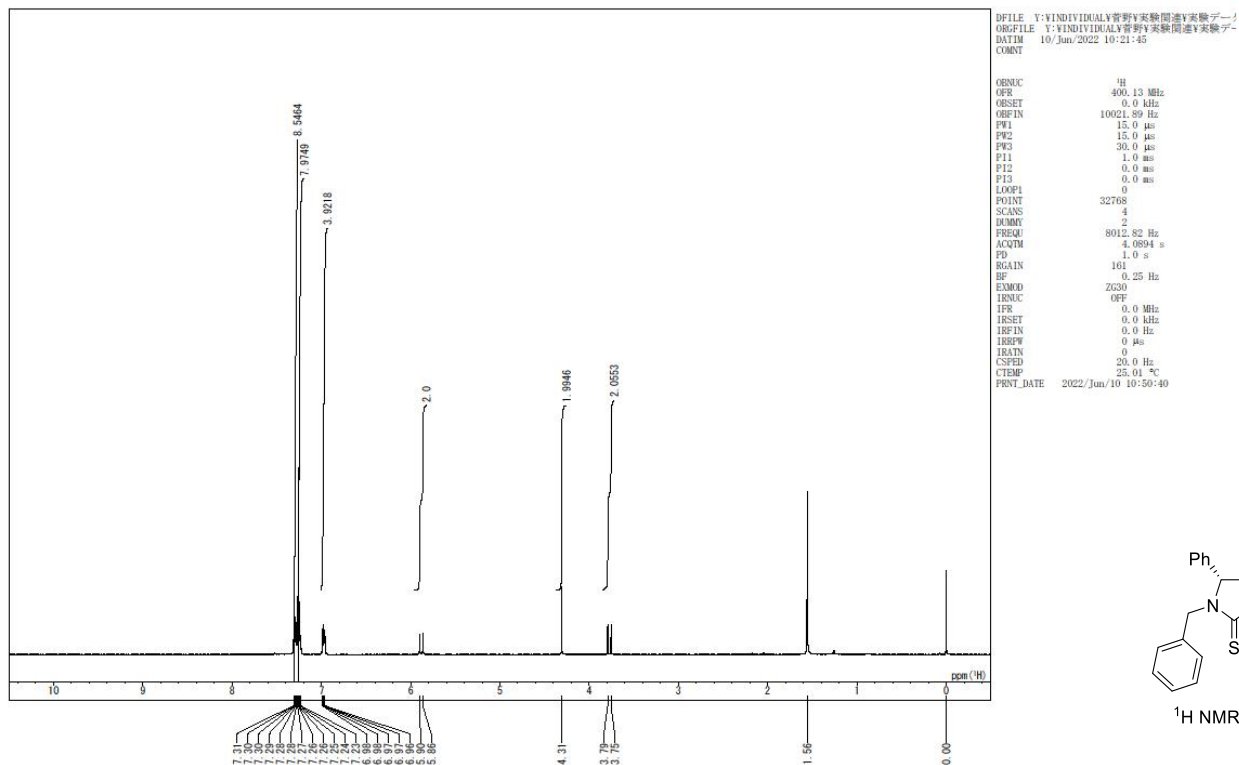

# Supporting Information II

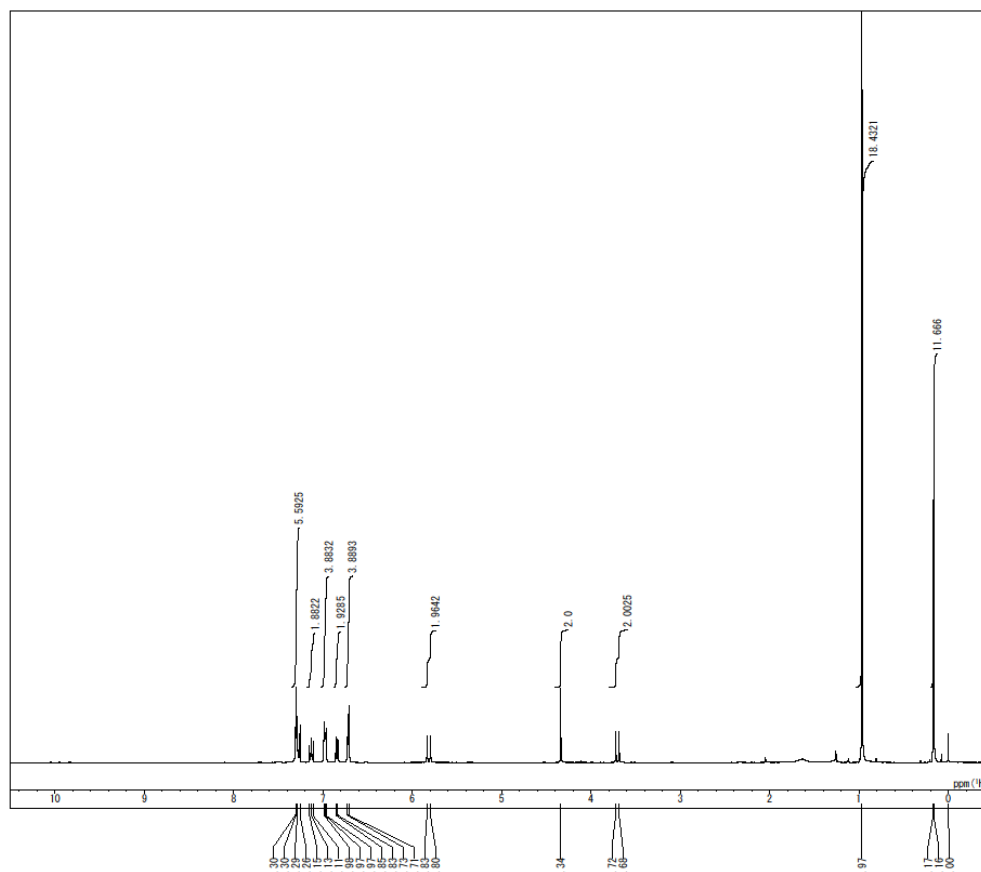

DFILE Y:\INDIVIDUALLY\菅野Y実験関連\菅野Y実験データ  
 ORFFILE Y:\INDIVIDUALLY\菅野Y実験関連\菅野Y実験データ  
 DATIM 16/Mar/2021 07:39:15  
 COMNT

ORNUC <sup>1</sup>H  
 OFR 400.13 MHz  
 ORSET 0.0 kHz  
 OFBIN 10021.89 Hz  
 PW1 15.0 μs  
 PW2 15.0 μs  
 PW3 30.0 μs  
 P11 1.0 ms  
 P12 0.0 ms  
 P13 0.0 ms  
 LOOP1 0  
 POINT 32768  
 SCANS 4  
 DUMY 2  
 FREQ 8012.82 Hz  
 ACQM 4.0894 s  
 PD 1.0 s  
 RGAIN 72  
 BF 0.25 Hz  
 EXMOD ZG30  
 IRUC OFF  
 IFR 0.0 MHz  
 IRSET 0.0 kHz  
 IREFIN 0.0 Hz  
 IREFW 0 μs  
 IRATN 0  
 CSPE 20.0 Hz  
 CTEMP 22.41 °C  
 PRINT\_DATE 2022/Jan/02 10:52:39

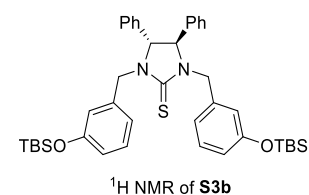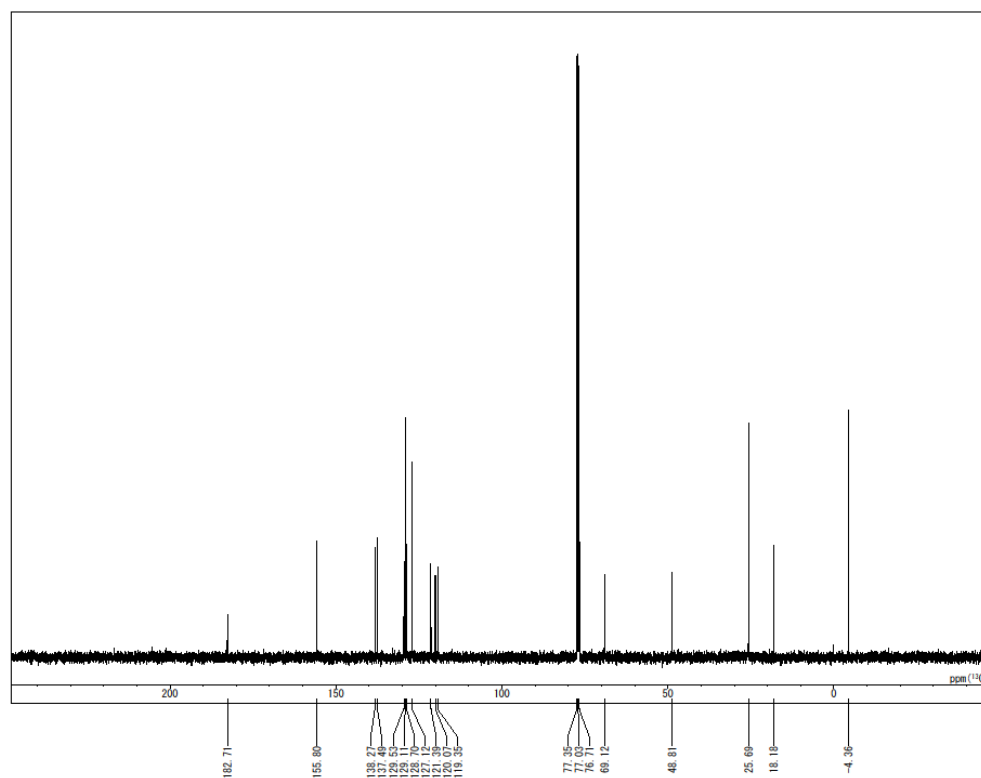

ORNUC <sup>13</sup>C  
 OFR 100.61 MHz  
 ORSET 0.0 kHz  
 OFBIN 9999.159 Hz  
 PW1 10.0 μs  
 PW2 10.0 μs  
 PW3 20.0 μs  
 P11 2.0 ms  
 P12 0.0035 ms  
 P13 0.0 ms  
 LOOP1 0  
 POINT 32768  
 SCANS 256  
 DUMY 2  
 FREQ 29761.9 Hz  
 ACQM 1.191 s  
 PD 2.0 s  
 RGAIN 161  
 BF 0.25 Hz  
 EXMOD ZPG30  
 IRUC OFF  
 IFR 0.0 MHz  
 IRSET 0.0 kHz  
 IREFIN 0.0 Hz  
 IREFW 0 μs  
 IRATN 0  
 CSPE 20.0 Hz  
 CTEMP 23.01 °C  
 PRINT\_DATE 2022/Jan/02 22:35:54

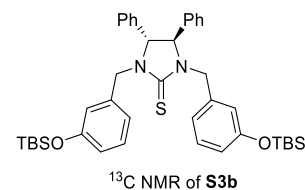

# Supporting Information II

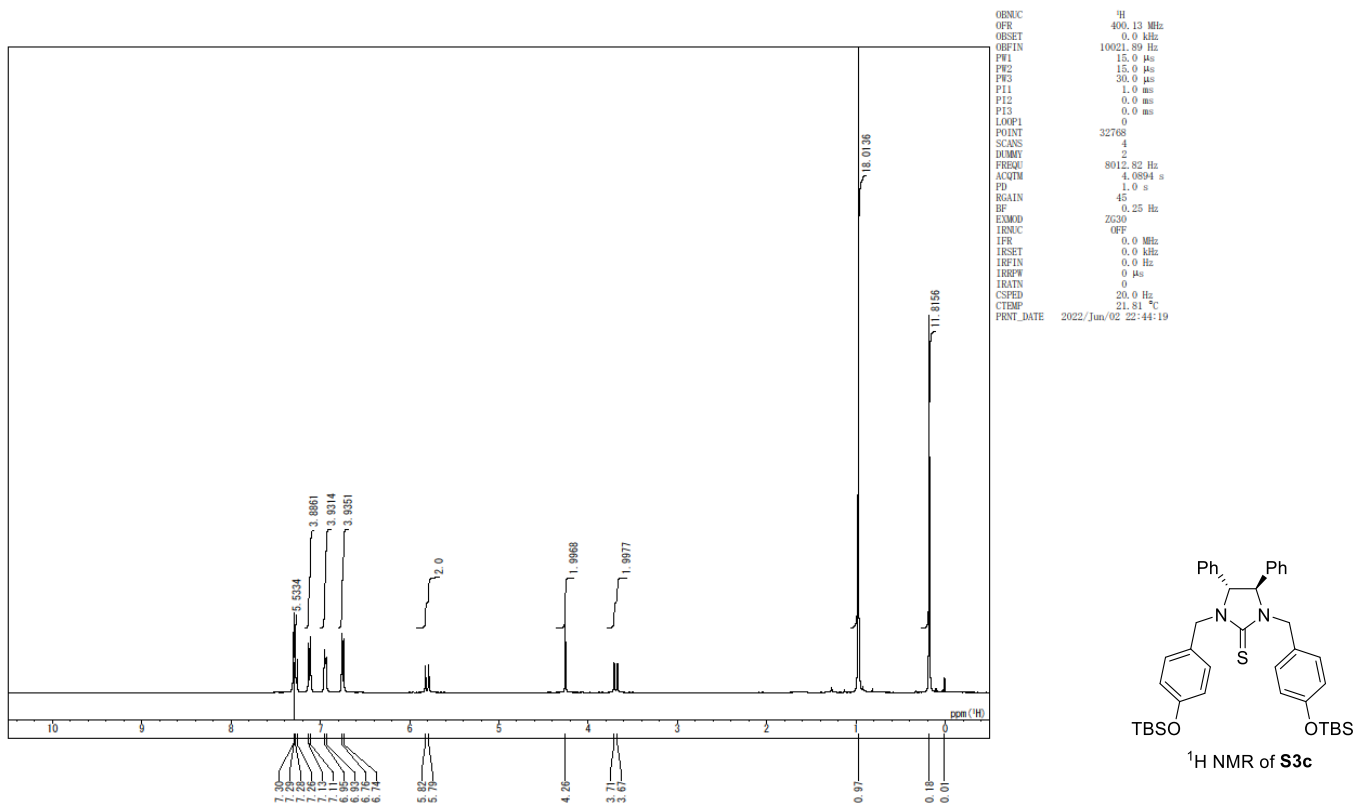

```

OBSUC      400.13 MHz
OFR        0.0 kHz
OBSET      10021.89 Hz
OBFIN      15.0 μs
PW1        15.0 μs
PWS        30.0 μs
P11        1.0 ms
P12        0.0 ms
P13        0.0 ms
LOOP1      0
POINT      32768
SCANS      4
DUMMY      2
FREQ      8012.82 Hz
ACQTM      4.0894 s
PD         1.0 s
RGAIN      45
BF         0.25 Hz
EXMOD      ZG30
IRNUC      OFF
IFR        0.0 MHz
IRSET      0.0 kHz
IRFIN      0.0 Hz
IRBPW      0 μs
IRATN      0
CSPED      20.0 Hz
CTEMP      22.31 °C
PRNT_DATE  2022/Jun/02 22:44:19
    
```

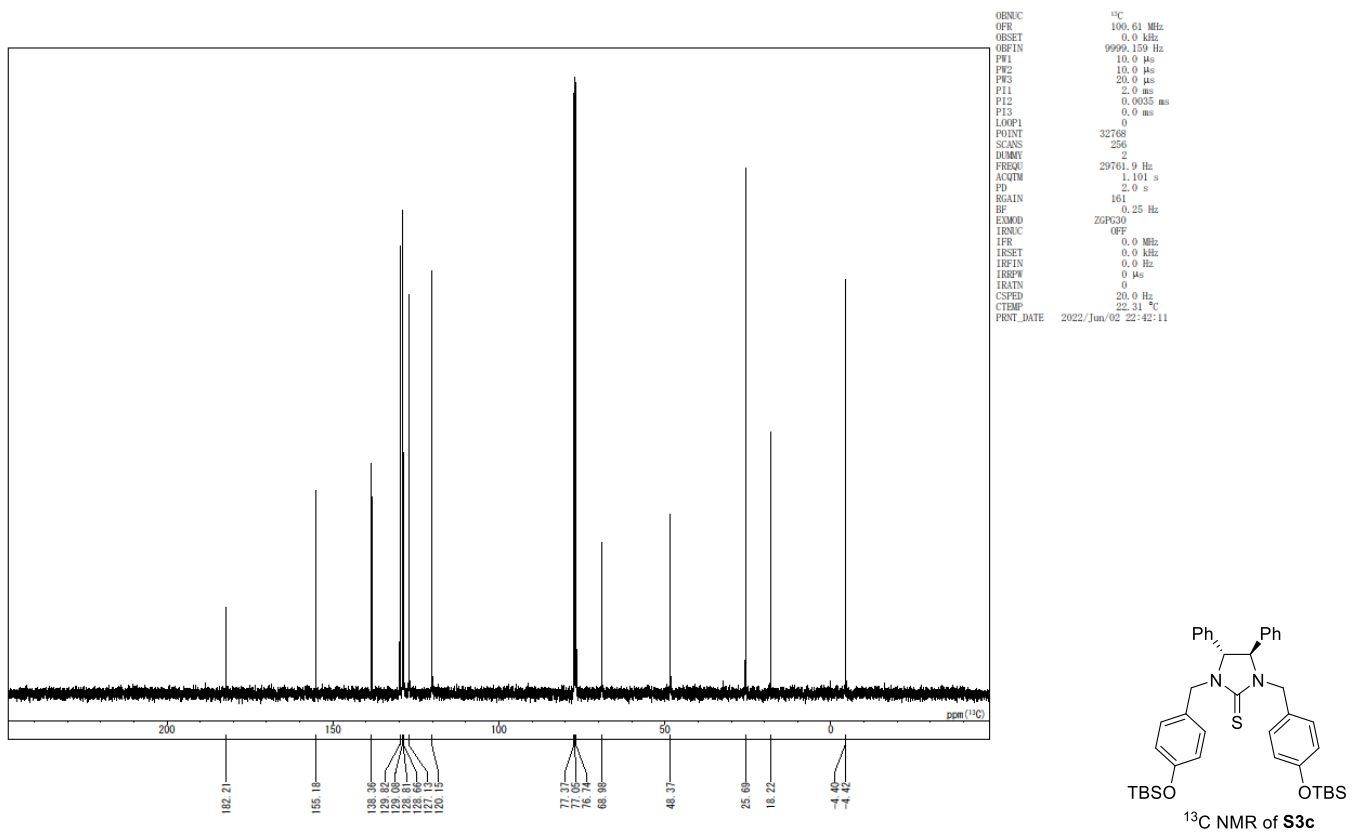

```

OBSUC      100.61 MHz
OFR        0.0 kHz
OBSET      9999.159 Hz
OBFIN      10.0 μs
PW1        10.0 μs
PWS        20.0 μs
P11        2.0 ms
P12        0.0035 ms
P13        0.0 ms
LOOP1      0
POINT      32768
SCANS      256
DUMMY      2
FREQ      29761.9 Hz
ACQTM      1.191 s
PD         2.0 s
RGAIN      161
BF         0.25 Hz
EXMOD      ZGPG30
IRNUC      OFF
IFR        0.0 MHz
IRSET      0.0 kHz
IRFIN      0.0 Hz
IRBPW      0 μs
IRATN      0
CSPED      20.0 Hz
CTEMP      22.31 °C
PRNT_DATE  2022/Jun/02 22:42:11
    
```

# Supporting Information II

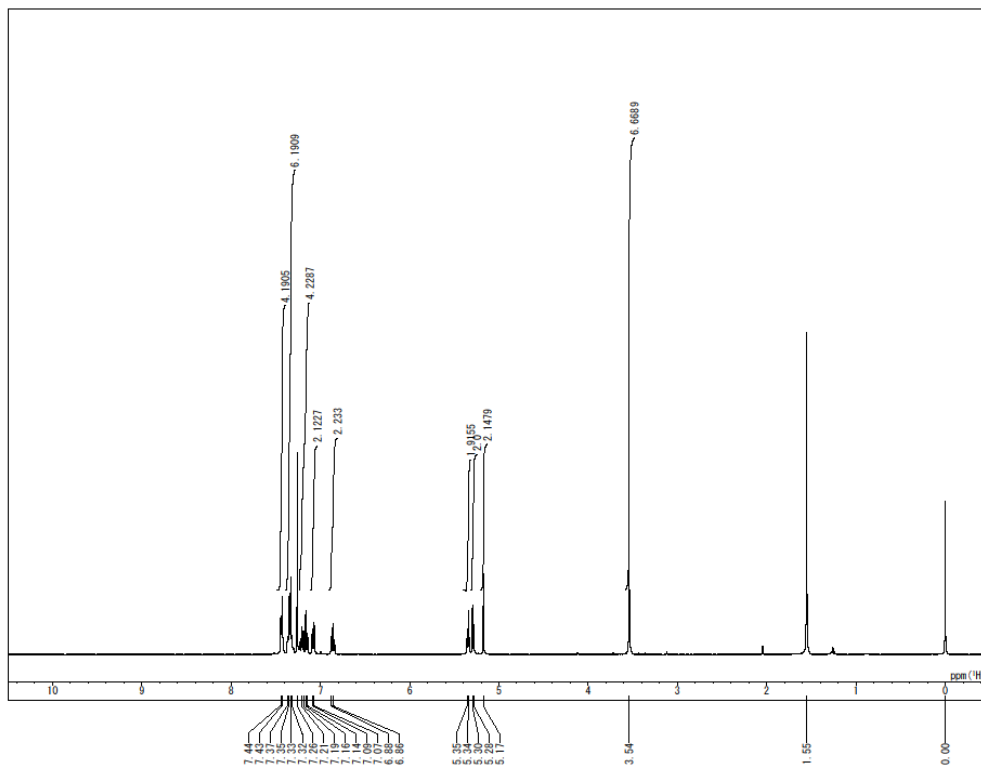

D:\FILE X:\V0620R0G\W0RGMSS193B\10\PPDATA\1\11  
 ORGFILE X:\V0620R0G\W0RGMSS193B\10\PPDATA\1\11  
 DATIM 20/Jan/2022 19:00:11  
 COMNT  
 OBNUC <sup>1</sup>H  
 OFR 400.00 MHz  
 ORSET 0.0 kHz  
 OFBIN 10009.24 Hz  
 PW1 2.6667 μs  
 PW2 8.0 μs  
 PW3 16.0 μs  
 P11 1.0 ms  
 P12 0.0 ms  
 P13 0.0 ms  
 LOOP1 0  
 POINT 65536  
 SCANS 4  
 DDMF 2  
 FREQ 7812.5 Hz  
 ACQTM 8.3886 s  
 FD 1.0 s  
 RGAIN 101  
 BF 0.25 Hz  
 EXMOD 2620  
 TRUC OFF  
 IFR 0.0 MHz  
 IRSET 0.0 kHz  
 IREFIN 0.0 Hz  
 IREFW 0 μs  
 IRATN 0  
 CSFD 0 Hz  
 CTEMP 25.0126 °C  
 PRNT\_DATE 2022/Jan/20 19:43:58

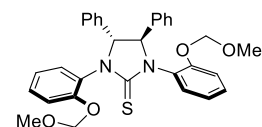

<sup>1</sup>H NMR of S3d

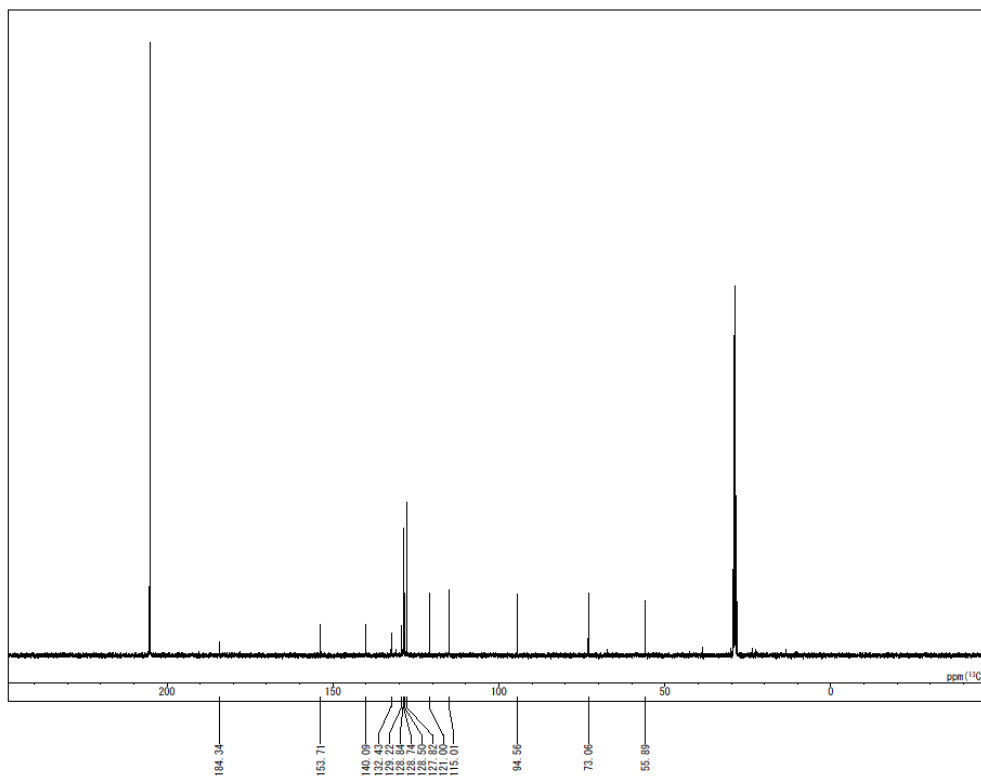

D:\FILE X:\V0620R0G\DATA\W0RGMSS201C-NMR\10\1  
 ORGFILE X:\V0620R0G\DATA\W0RGMSS201C-NMR\10\1  
 DATIM 01/Jul/2022 18:47:48  
 COMNT  
 OBNUC <sup>13</sup>C  
 OFR 100.61 MHz  
 ORSET 0.0 kHz  
 OFBIN 9999.159 Hz  
 PW1 10.0 μs  
 PW2 10.0 μs  
 PW3 20.0 μs  
 P11 2.0 ms  
 P12 0.0035 ms  
 P13 0.0 ms  
 LOOP1 0  
 POINT 32768  
 SCANS 256  
 DDMF 2  
 FREQ 29761.9 Hz  
 ACQTM 1.101 s  
 FD 2.0 s  
 RGAIN 203  
 BF 0.25 Hz  
 EXMOD 2620  
 TRUC OFF  
 IFR 0.0 MHz  
 IRSET 0.0 kHz  
 IREFIN 0.0 Hz  
 IREFW 0 μs  
 IRATN 0  
 CSFD 20.0 Hz  
 CTEMP 27.71 °C  
 PRNT\_DATE 2022/Jul/01 20:35:57

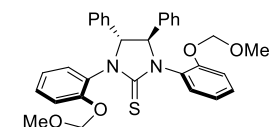

<sup>13</sup>C NMR of S3d



# Supporting Information II

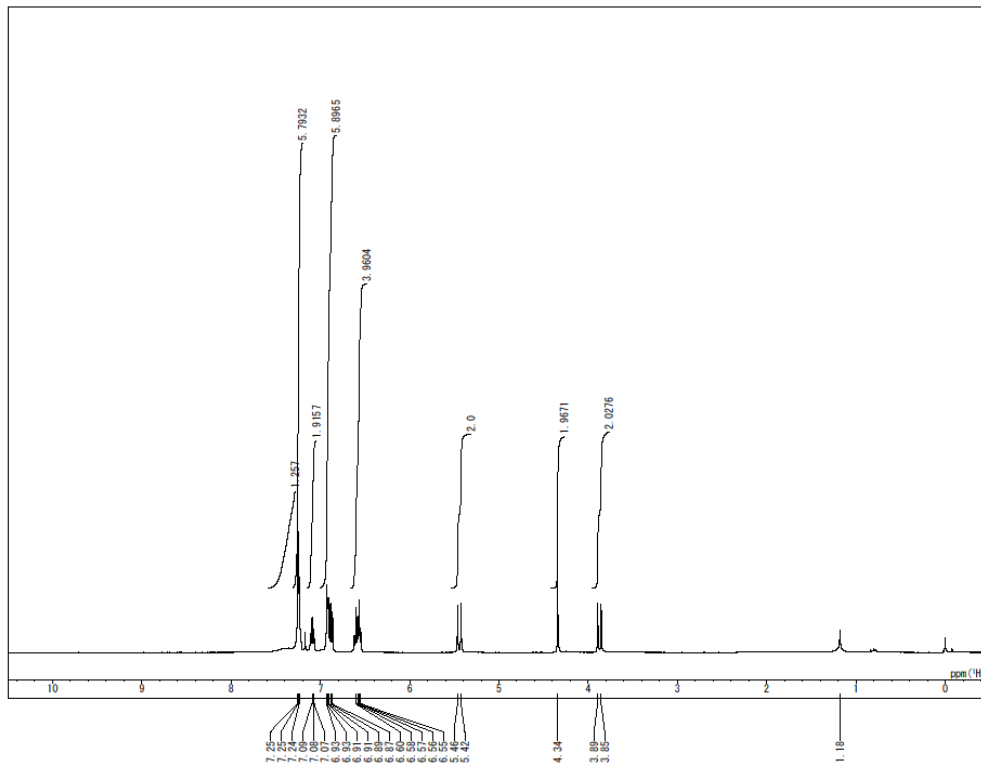

```

ORNUC      7H
OF2        400.13 MHz
OBSET      0.0 kHz
OBFIN      10021.89 Hz
PW1        14.0 µs
PW2        14.0 µs
PWS        28.0 µs
P11        1.0 ms
P12        0.0 ms
P13        0.0 ms
LOOP1      0
POINT      32768
SCANS      4
DUMY       2
FREQU      8012.82 Hz
ACQTM      4.0894 s
FD          1.0 s
RGAIN      72
BF          0.25 Hz
EXMOD      ZGPG30
IRNUC      OFF
IPR         0.0 MHz
IRSET      0.0 kHz
IRFIN      0.0 Hz
IRFPW      0 µs
IRATN      0
IRSPED     20.0 Hz
CTEMP      23.01 °C
PRNT_DATE  2022/Jun/02 23:26:57
    
```

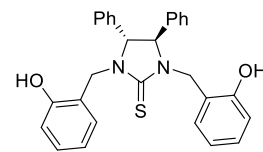

<sup>1</sup>H NMR of 4a

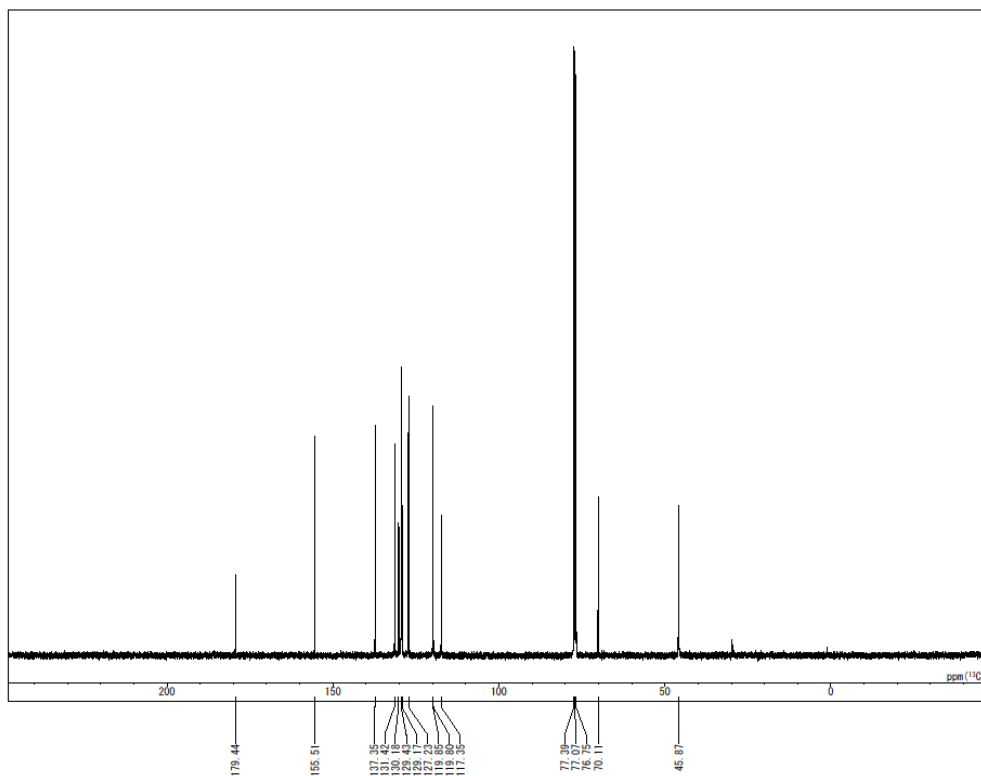

```

ORNUC      13C
OF2        100.61 MHz
OBSET      0.0 kHz
OBFIN      9999.159 Hz
PW1        8.0 µs
PW2        8.0 µs
PWS        17.2 µs
P11        2.0 ms
P12        0.0035 ms
P13        0.0 ms
LOOP1      0
POINT      32768
SCANS      1024
DUMY       2
FREQU      29761.9 Hz
ACQTM      1.101 s
FD          2.0 s
RGAIN      114
BF          0.25 Hz
EXMOD      ZGPG30
IRNUC      OFF
IPR         0.0 MHz
IRSET      0.0 kHz
IRFIN      0.0 Hz
IRFPW      0 µs
IRATN      0
IRSPED     20.0 Hz
CTEMP      24.01 °C
PRNT_DATE  2022/Jun/02 23:27:59
    
```

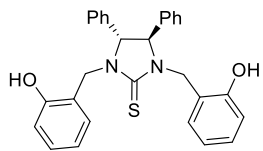

<sup>13</sup>C NMR of 4a

# Supporting Information II

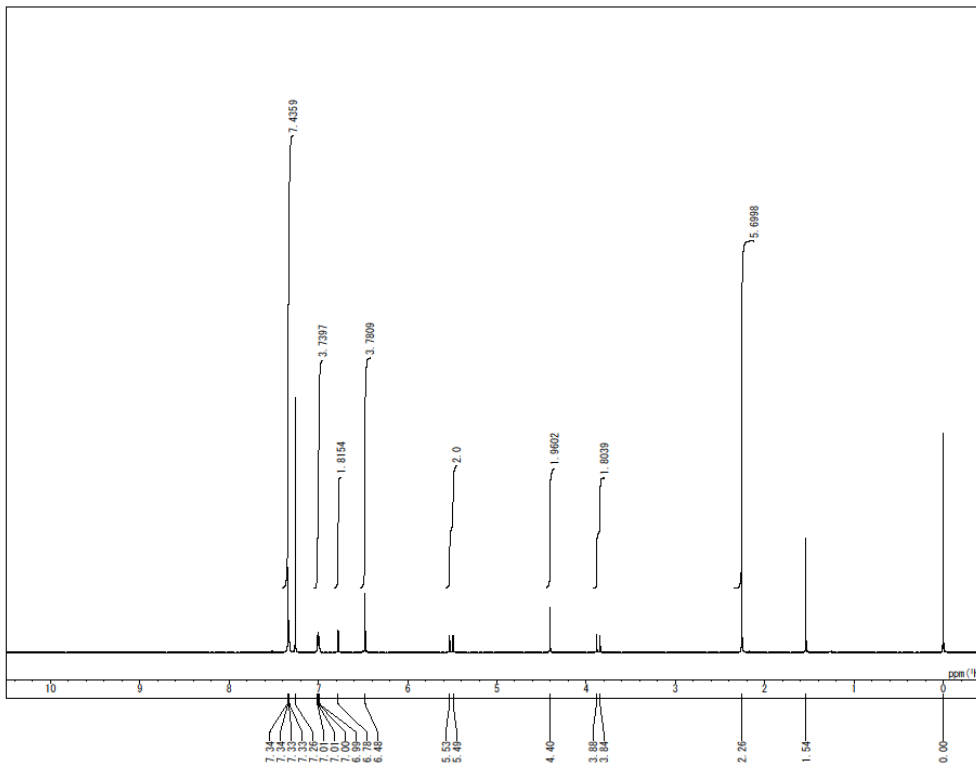

D:\FILE Y:\INDIVIDUALLY\實驗Y実験関連Y実験データ  
 ORF\FILE Y:\INDIVIDUALLY\實驗Y実験関連Y実験データ  
 DATIM 11/Jan/2022 15:53:41  
 COMNT  
  
 ORNUC <sup>1</sup>H  
 OFR 400.13 MHz  
 ORSET 0.0 kHz  
 OFBIN 10021.89 Hz  
 PW1 15.0 μs  
 PW2 15.0 μs  
 PW3 30.0 μs  
 P11 1.0 ms  
 P12 0.0 ms  
 P13 0.0 ms  
 LOOP1 0  
 POINT 32768  
 SCANS 4  
 DOMM 2  
 FREQ 8012.32 Hz  
 ACQTM 4.0894 s  
 PD 1.0 s  
 RGAIN 161  
 BF 0.25 Hz  
 EXMOD ZG30  
 TRUC OFF  
 IFR 0.0 MHz  
 IRSET 0.0 kHz  
 IREFIN 0.0 Hz  
 IRRPW 0 μs  
 IRATN 0  
 CSFED 20.0 Hz  
 CTEMP 25.01 °C  
 PRNT\_DATE 2022/Jan/11 16:27:29

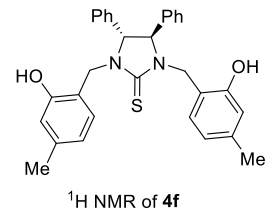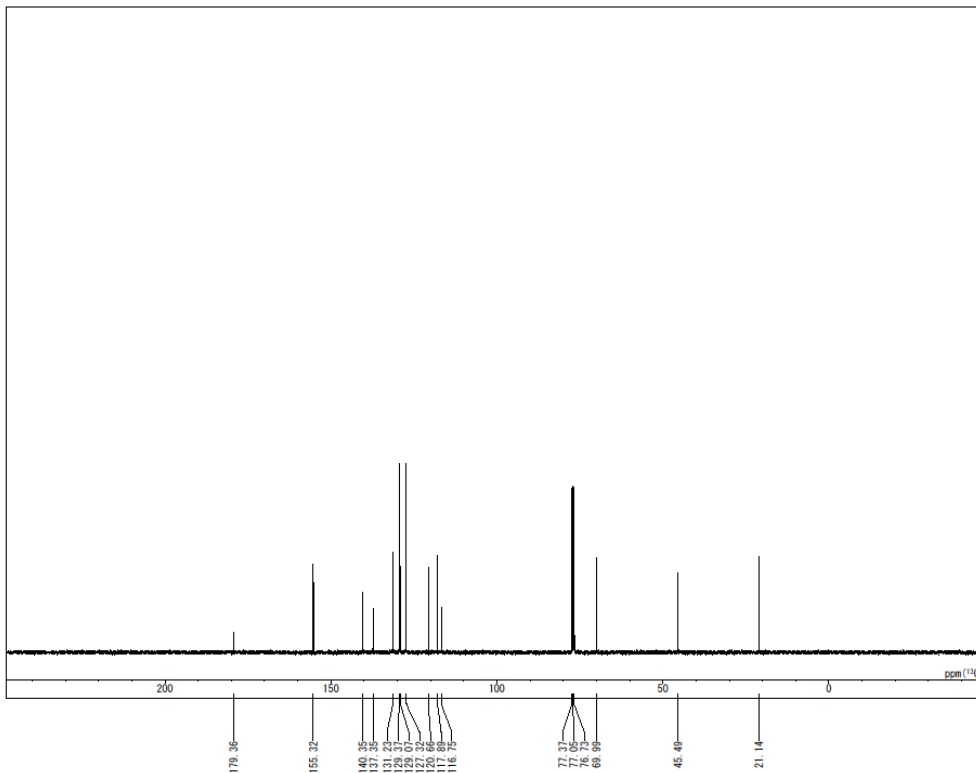

D:\FILE Y:\INDIVIDUALLY\實驗Y実験関連Y実験データ  
 ORF\FILE Y:\INDIVIDUALLY\實驗Y実験関連Y実験データ  
 DATIM 11/Jan/2022 16:17:28  
 COMNT  
  
 ORNUC <sup>13</sup>C  
 OFR 100.61 MHz  
 ORSET 0.0 kHz  
 OFBIN 9999.159 Hz  
 PW1 10.0 μs  
 PW2 10.0 μs  
 PW3 20.0 μs  
 P11 2.0 ms  
 P12 0.0035 ms  
 P13 0.0 ms  
 LOOP1 0  
 POINT 32768  
 SCANS 256  
 DOMM 2  
 FREQ 29761.9 Hz  
 ACQTM 1.101 s  
 PD 2.0 s  
 RGAIN 203  
 BF 0.25 Hz  
 EXMOD ZGPG30  
 TRUC OFF  
 IFR 0.0 MHz  
 IRSET 0.0 kHz  
 IREFIN 0.0 Hz  
 IRRPW 0 μs  
 IRATN 0  
 CSFED 20.0 Hz  
 CTEMP 25.81 °C  
 PRNT\_DATE 2022/Jan/11 16:33:54

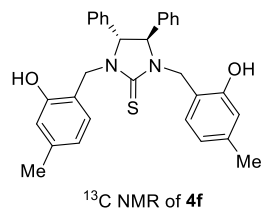

# Supporting Information II

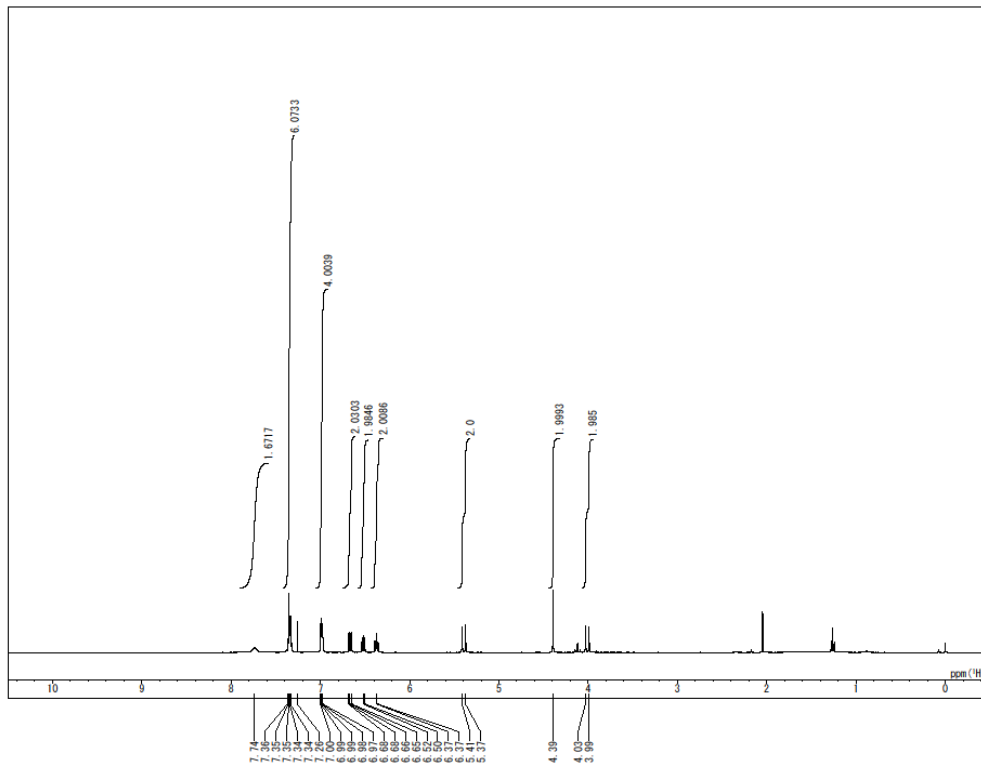

```

NAME          4h
ORNUC        400.13 MHz
ORF           0.0 kHz
ORSET        10021.89 Hz
ORFIN
PWI          15.0 µs
PWF          15.0 µs
PFS          30.0 µs
P11          1.0 ms
P12          0.0 ms
P13          0.0 ms
LOOP1        0
POINT        32768
SCANS        4
DUMY         2
FREQ         8012.82 Hz
ACQTM        4.0594 s
PD           1.0 s
RGAIN        101
BF           0.25 Hz
EMOD         ZG30
IRNUC        OFF
IFP          0.0 MHz
IRSET        0.0 kHz
IRFIN        0.0 Hz
IRPW         0 µs
IRATN        0
CSPED        20.0 Hz
CTEMP        22.51 °C
PRNT_DATE    2022/Jun/02 23:52:54
    
```

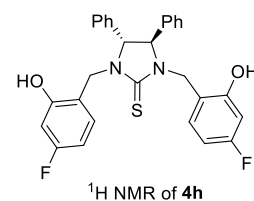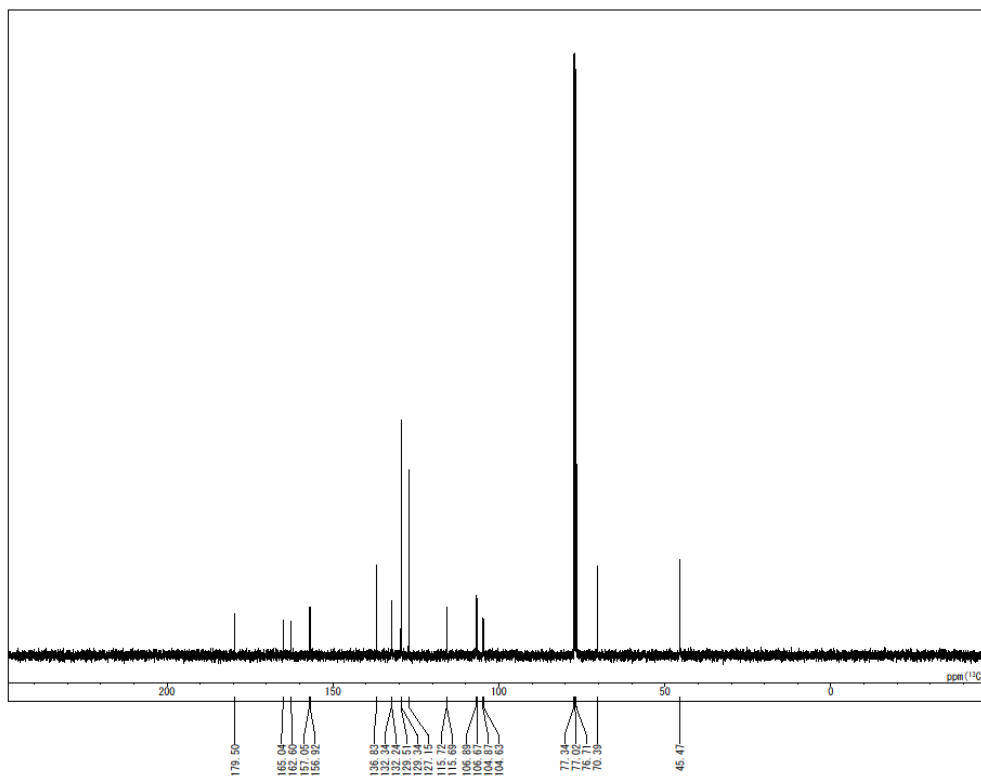

```

NAME          4h
ORNUC        100.61 MHz
ORF           0.0 kHz
ORSET        9999.159 Hz
ORFIN
PWI          10.0 µs
PWF          10.0 µs
PFS          20.0 µs
P11          2.0 ms
P12          0.0035 ms
P13          0.0 ms
LOOP1        0
POINT        32768
SCANS        256
DUMY         2
FREQ         29761.9 Hz
ACQTM        1.191 s
PD           2.0 s
RGAIN        161
BF           0.25 Hz
EMOD         ZGPG30
IRNUC        OFF
IFP          0.0 MHz
IRSET        0.0 kHz
IRFIN        0.0 Hz
IRPW         0 µs
IRATN        0
CSPED        20.0 Hz
CTEMP        23.01 °C
PRNT_DATE    2022/Jun/02 23:50:46
    
```

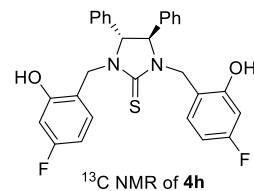

# Supporting Information II

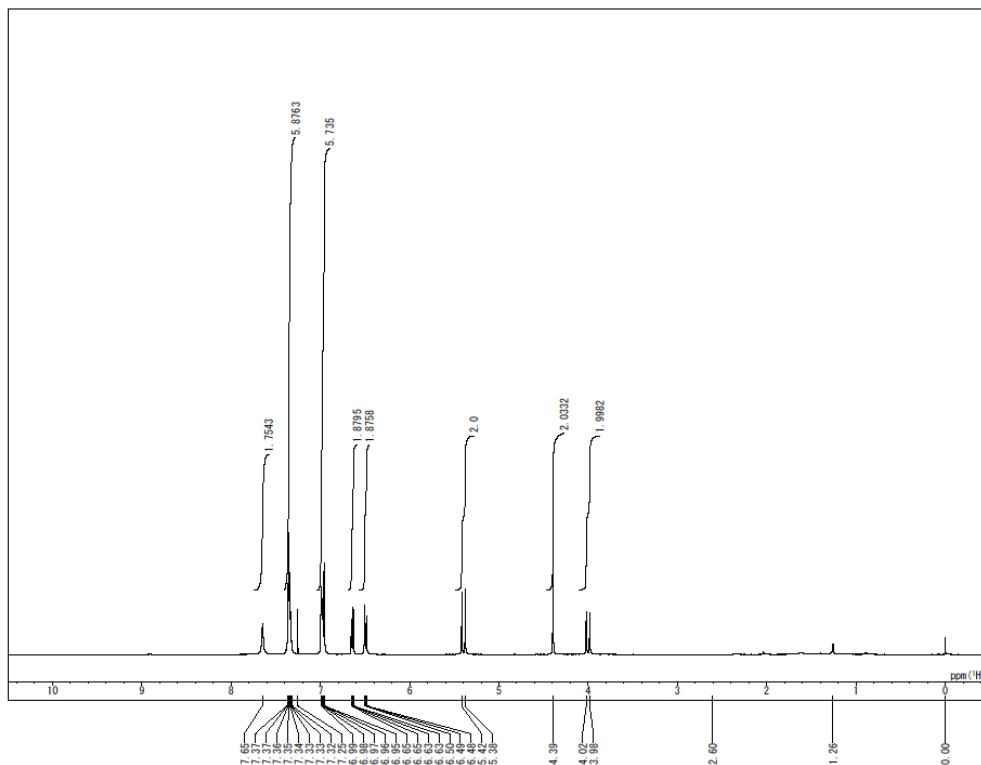

D:\FILE Y:\INDIVIDUALLY\菅野Y実験関連\Y実験データ  
 ORGFILE Y:\INDIVIDUALLY\菅野Y実験関連\Y実験デー  
 DATIM 12/Jan/2022 18:37:55  
 COMNT  
 OBNUC <sup>1</sup>H  
 OFR 400.13 MHz  
 ORSET 0.0 kHz  
 OFBIN 10021.89 Hz  
 PW1 15.0 μs  
 PW2 15.0 μs  
 PW3 30.0 μs  
 P11 1.0 ms  
 P12 0.0 ms  
 P13 0.0 ms  
 LOOP1 0  
 POINT 32768  
 SCANS 4  
 DOMM 2  
 FREQ 8012.82 Hz  
 ACQTM 4.0894 s  
 PD 1.0 s  
 RGAIN 72  
 BF 0.25 Hz  
 EXMOD ZG30  
 INUC OFF  
 IFR 0.0 MHz  
 IRSET 0.0 kHz  
 IREFIN 0.0 Hz  
 IRRPW 0 μs  
 IRATN 0  
 CSFED 20.0 Hz  
 CTEMP 25.31 °C  
 PRNT\_DATE 2022/Jan/12 19:17:01

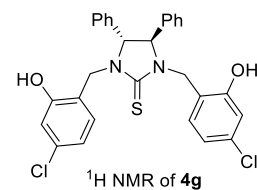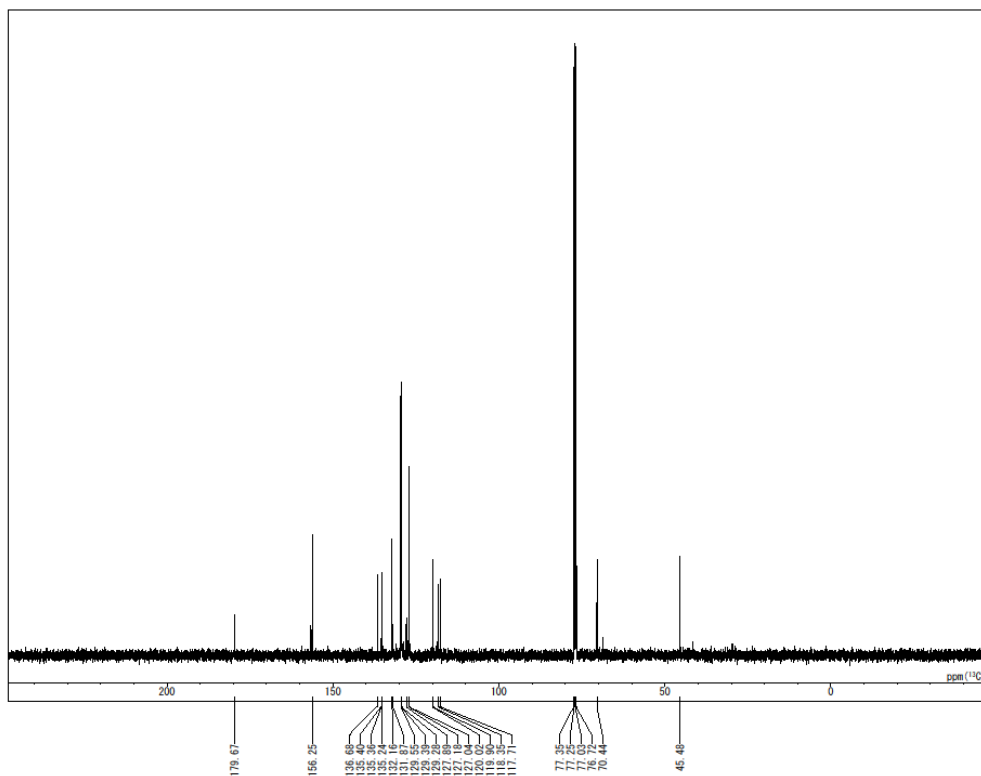

D:\FILE Y:\INDIVIDUALLY\菅野Y実験関連\Y実験デー  
 ORGFILE Y:\INDIVIDUALLY\菅野Y実験関連\Y実験デー  
 DATIM 27/Mar/2021 01:43:06  
 COMNT  
 OBNUC <sup>13</sup>C  
 OFR 100.61 MHz  
 ORSET 0.0 kHz  
 OFBIN 9999.159 Hz  
 PW1 10.0 μs  
 PW2 10.0 μs  
 PW3 20.0 μs  
 P11 2.0 ms  
 P12 0.0035 ms  
 P13 0.0 ms  
 LOOP1 0  
 POINT 32768  
 SCANS 256  
 DOMM 2  
 FREQ 29761.9 Hz  
 ACQTM 1.101 s  
 PD 2.0 s  
 RGAIN 203  
 BF 0.25 Hz  
 EXMOD ZGPG30  
 INUC OFF  
 IFR 0.0 MHz  
 IRSET 0.0 kHz  
 IREFIN 0.0 Hz  
 IRRPW 0 μs  
 IRATN 0  
 CSFED 20.0 Hz  
 CTEMP 22.81 °C  
 PRNT\_DATE 2022/Jan/12 19:21:53

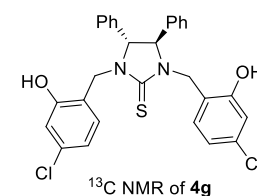

Supporting Information II

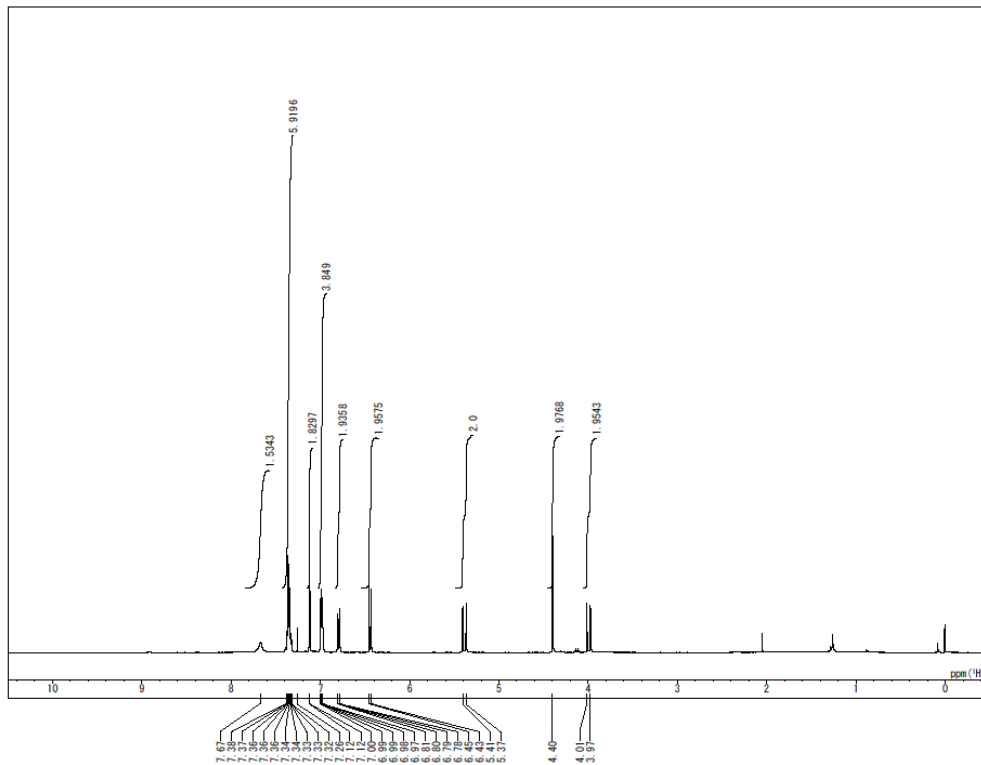

```

OBSUC      400.13 MHz
OFR        0.0 kHz
OBSET      10021.89 Hz
OBSIN      15.0 µs
PW1        15.0 µs
PWS        30.0 µs
P11        1.0 ms
P12        0.0 ms
P13        0.0 ms
LOOP1      0
POINT      32768
SCANS      4
DUMMY      2
FREQ      8012.82 Hz
ACQTM      4.6894 s
PD         1.0 s
RGAIN      72
BF         0.25 Hz
EXMOD      ZG30
IRNUC      OFF
IFR        0.0 MHz
IRSET      0.0 kHz
IRFIN      0.0 Hz
IRPW       0 µs
IRATN      0
CSPED      20.0 Hz
CTEMP      22.51 °C
PRNT_DATE  2022/Jun/03 00:03:38
  
```

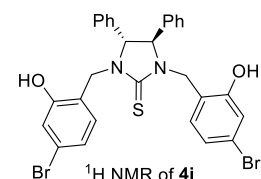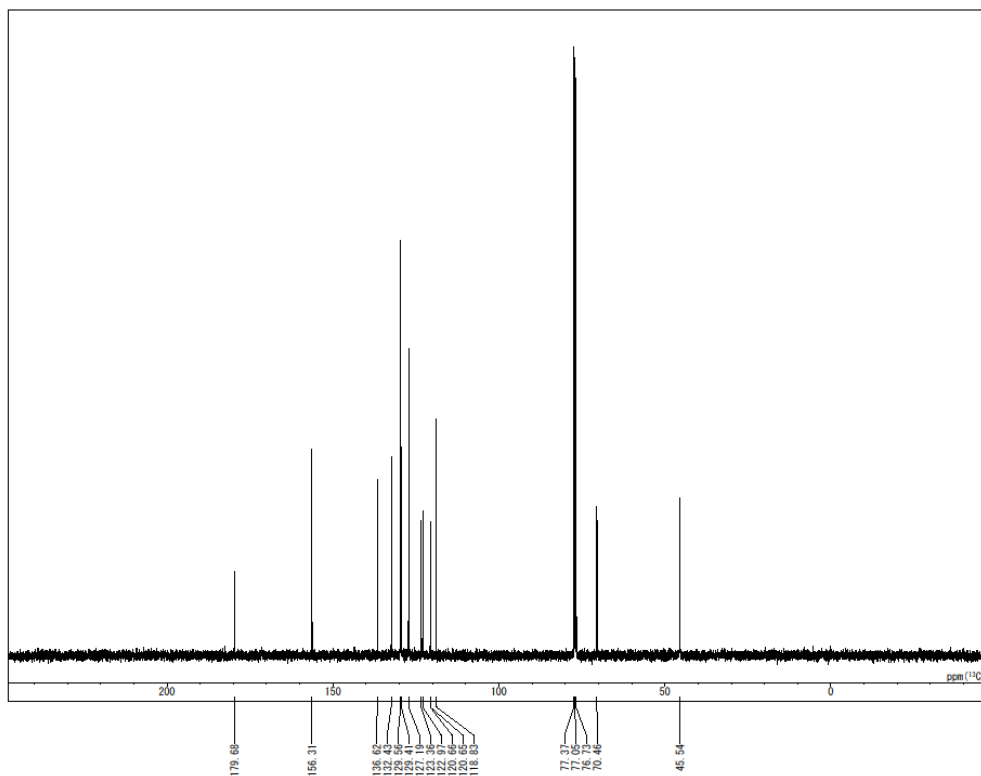

```

OBSUC      100.61 MHz
OFR        0.0 kHz
OBSET      9999.159 Hz
OBSIN      10.0 µs
PW1        10.0 µs
PWS        20.0 µs
P11        2.0 ms
P12        0.0035 ms
P13        0.0 ms
LOOP1      0
POINT      32768
SCANS      256
DUMMY      2
FREQ      29761.9 Hz
ACQTM      1.191 s
PD         2.0 s
RGAIN      144
BF         0.25 Hz
EXMOD      ZPG30
IRNUC      OFF
IFR        0.0 MHz
IRSET      0.0 kHz
IRFIN      0.0 Hz
IRPW       0 µs
IRATN      0
CSPED      20.0 Hz
CTEMP      22.71 °C
PRNT_DATE  2022/Jun/03 00:01:49
  
```

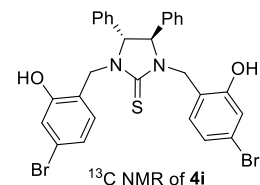

# Supporting Information II

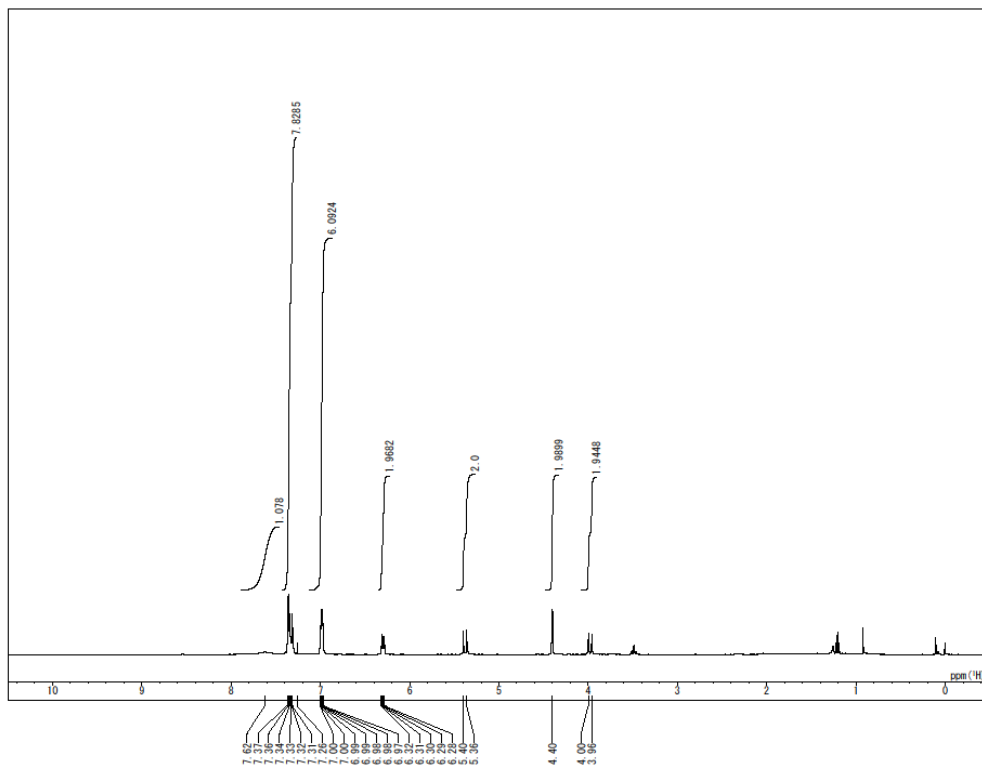

```

ORNUC      1H
OPR        400.13 MHz
OBSET      0.0 kHz
OBFIN      10021.89 Hz
OBF1       15.0 µs
PW2        15.0 µs
PFS        30.0 µs
P11        1.0 ms
P12        0.0 ms
P13        0.0 ms
LOOP1      0
POINT      32768
SCANS      4
DUMMY      2
FREQ      8012.82 Hz
ACQTM      4.0894 s
PD         1.0 s
RGAIN      64
BF         0.25 Hz
EXMOD      ZG30
IRNUC      OFF
IFR        0.0 MHz
IRSET      0.0 kHz
IRFIN      0.0 Hz
IRPWF      0 µs
IRATN      0
CSFED      20.0 Hz
CTEMP      22.91 °C
PRNT_DATE  2022/Jun/03 00:08:40
  
```

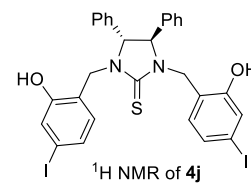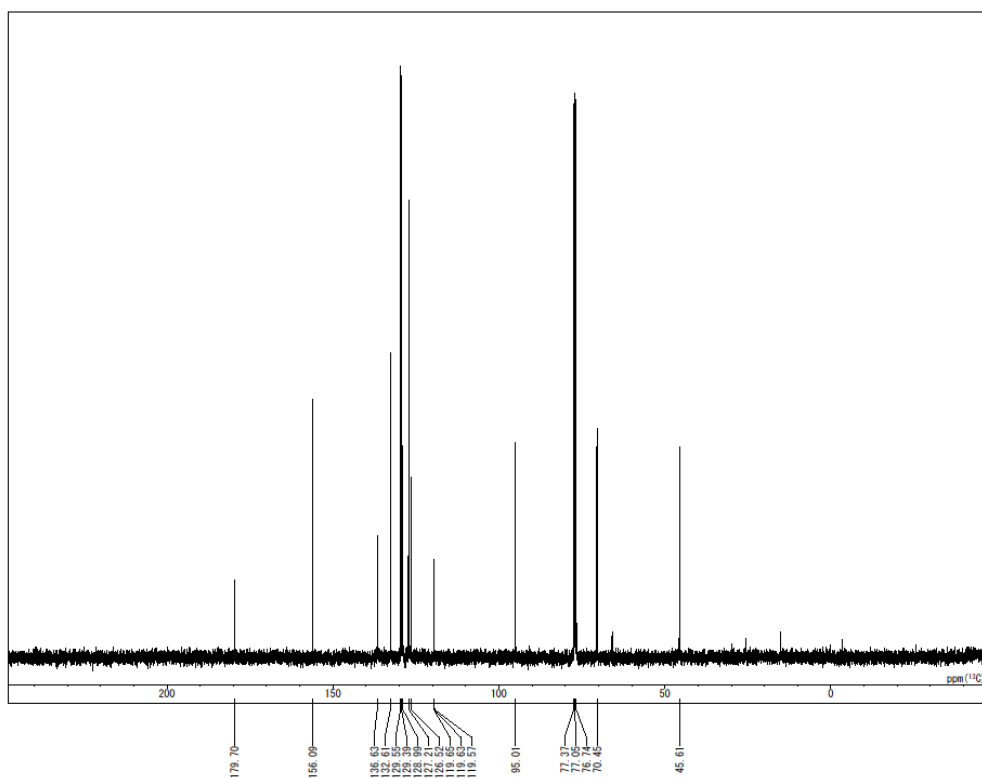

```

ORNUC      13C
OPR        100.61 MHz
OBSET      0.0 kHz
OBFIN      9999.159 Hz
OBF1       10.0 µs
PW2        10.0 µs
PFS        20.0 µs
P11        2.0 ms
P12        0.0035 ms
P13        0.0 ms
LOOP1      0
POINT      32768
SCANS      256
DUMMY      2
FREQ      29761.9 Hz
ACQTM      1.191 s
PD         2.0 s
RGAIN      144
BF         0.25 Hz
EXMOD      ZGPG30
IRNUC      OFF
IFR        0.0 MHz
IRSET      0.0 kHz
IRFIN      0.0 Hz
IRPWF      0 µs
IRATN      0
CSFED      20.0 Hz
CTEMP      22.91 °C
PRNT_DATE  2022/Jun/03 00:06:11
  
```

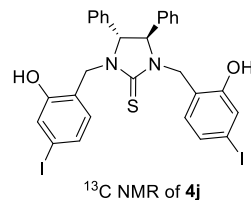

# Supporting Information II

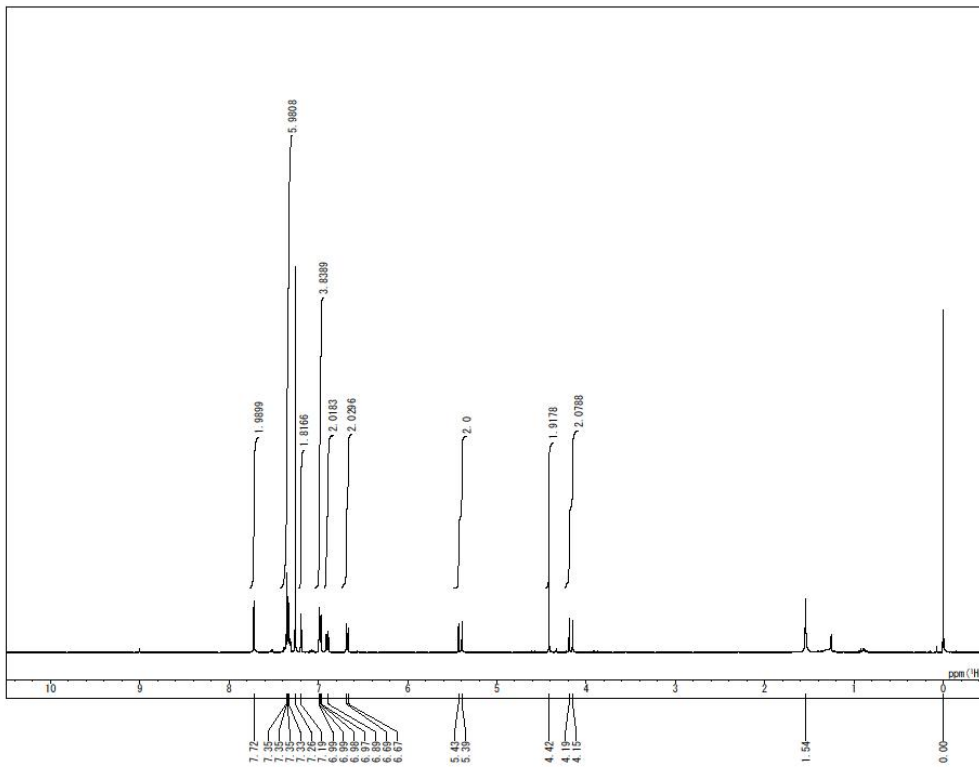

D:\FILE Y:\INDIVIDUALLY\實驗\測定\Y実験データ  
 ORF\FILE Y:\INDIVIDUALLY\實驗\測定\Y実験データ  
 DATIM 13/Jun/2022 15:54:42  
 COMNT  
 ORNUC <sup>1</sup>H  
 OFR 400.13 MHz  
 ORSET 0.0 kHz  
 ORFIN 10021.89 Hz  
 PW1 15.0 μs  
 PW2 15.0 μs  
 PFG 30.0 μs  
 P11 1.0 ms  
 P12 0.0 ms  
 P13 0.0 ms  
 LOOP1 0  
 POINT 32768  
 SCANS 4  
 DUMMY 2  
 FREQ 8012.82 Hz  
 ACQTM 4.0894 s  
 PD 1.0 s  
 RGAIN 161  
 BF 0.2223 Hz  
 EXMOD ZG30  
 IRNUC OFF  
 IFR 0.0 MHz  
 IRSET 0.0 kHz  
 IRFIN 0.0 Hz  
 IRPW 0 μs  
 IRATN 0  
 CSPED 20.0 Hz  
 CTMP 23.01 °C  
 PRNT\_DATE 2022/Jun/22 10:23:47

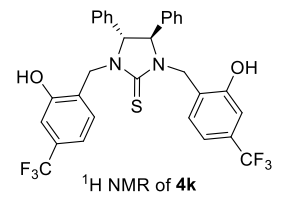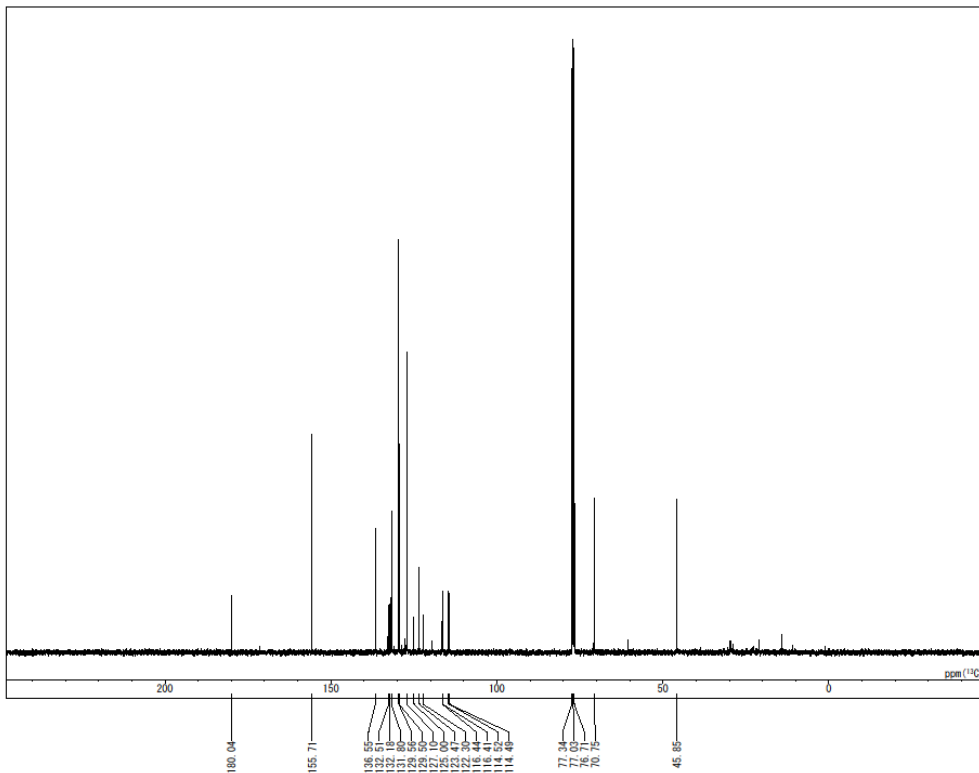

ORNUC <sup>13</sup>C  
 OFR 100.61 MHz  
 ORSET 0.0 kHz  
 ORFIN 9999.159 Hz  
 PW1 10.0 μs  
 PW2 10.0 μs  
 PFG 20.0 μs  
 P11 2.0 ms  
 P12 0.0035 ms  
 P13 0.0 ms  
 LOOP1 0  
 POINT 32768  
 SCANS 1024  
 DUMMY 2  
 FREQ 29761.9 Hz  
 ACQTM 1.191 s  
 PD 2.0 s  
 RGAIN 181  
 BF 0.25 Hz  
 EXMOD ZPG30  
 IRNUC OFF  
 IFR 0.0 MHz  
 IRSET 0.0 kHz  
 IRFIN 0.0 Hz  
 IRPW 0 μs  
 IRATN 0  
 CSPED 20.0 Hz  
 CTMP 23.01 °C  
 PRNT\_DATE 2022/Jun/03 00:12:07

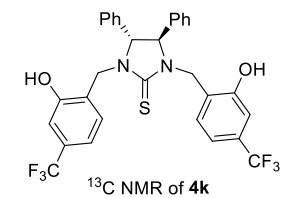

# Supporting Information II

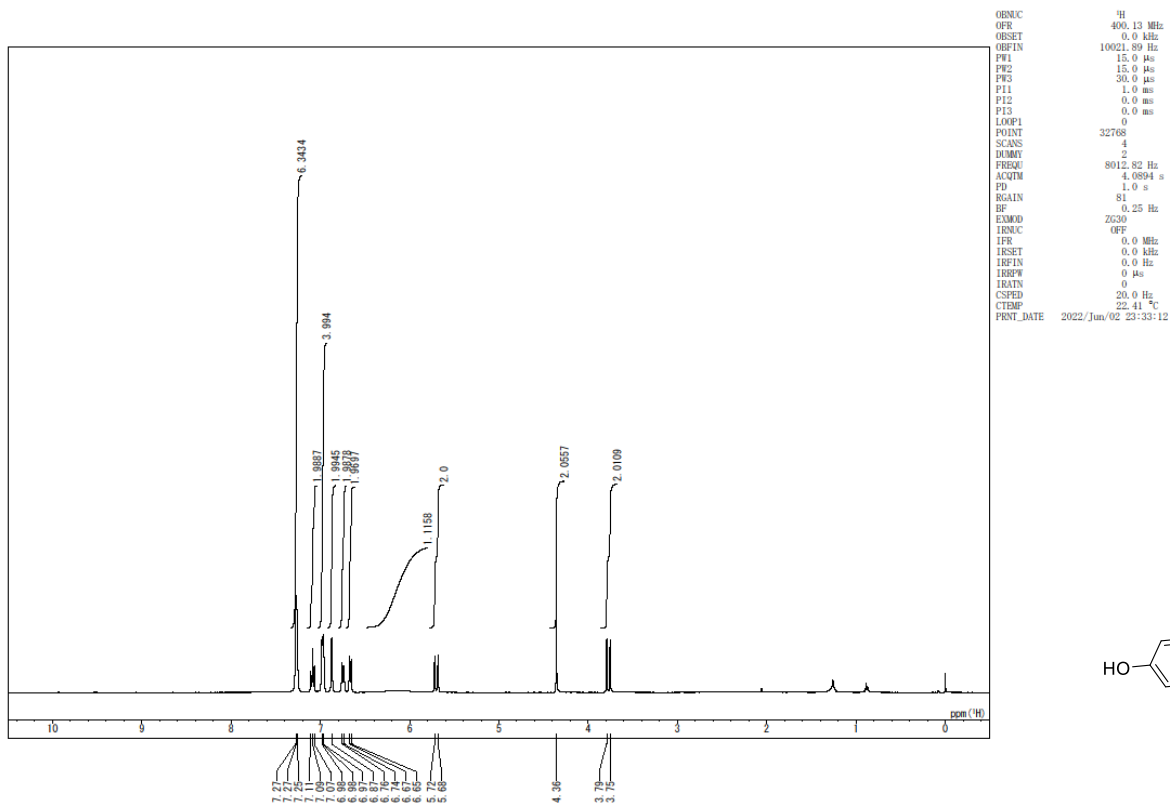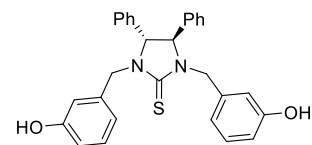

<sup>1</sup>H NMR of 4b

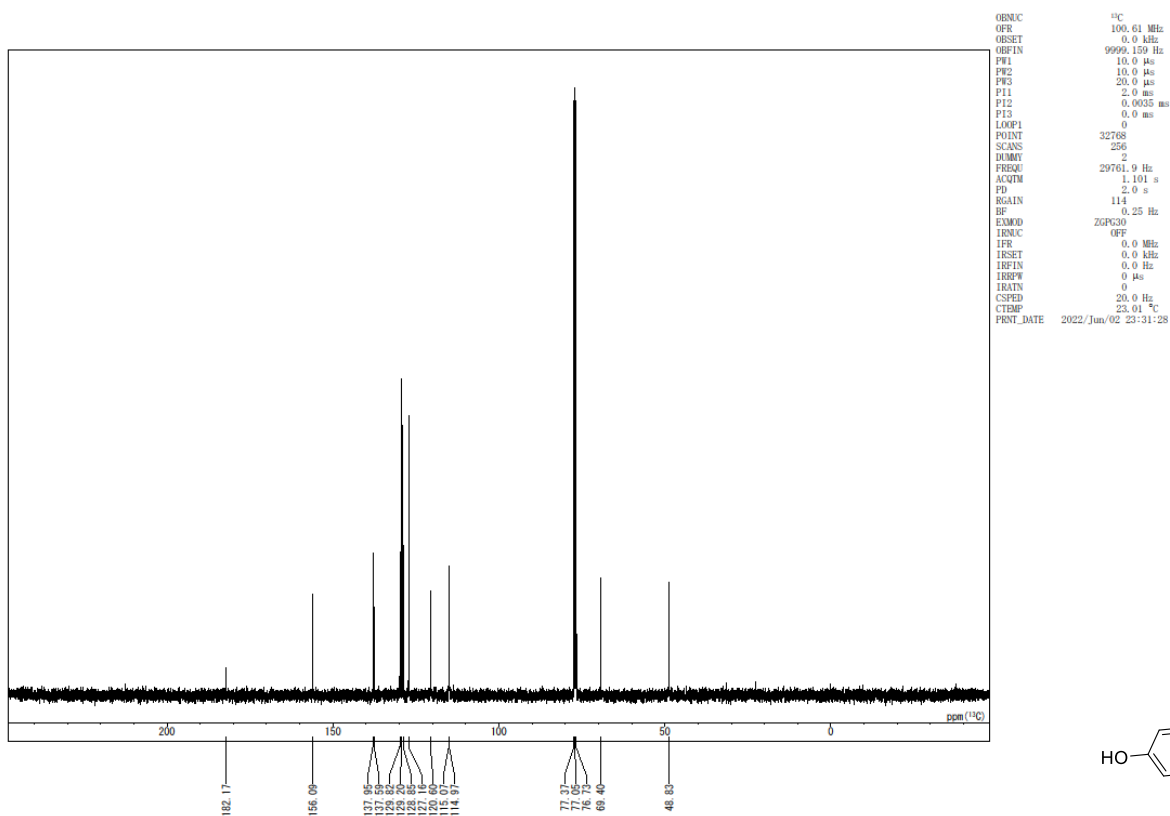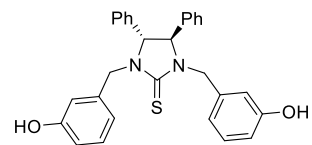

<sup>13</sup>C NMR of 4b



# Supporting Information II

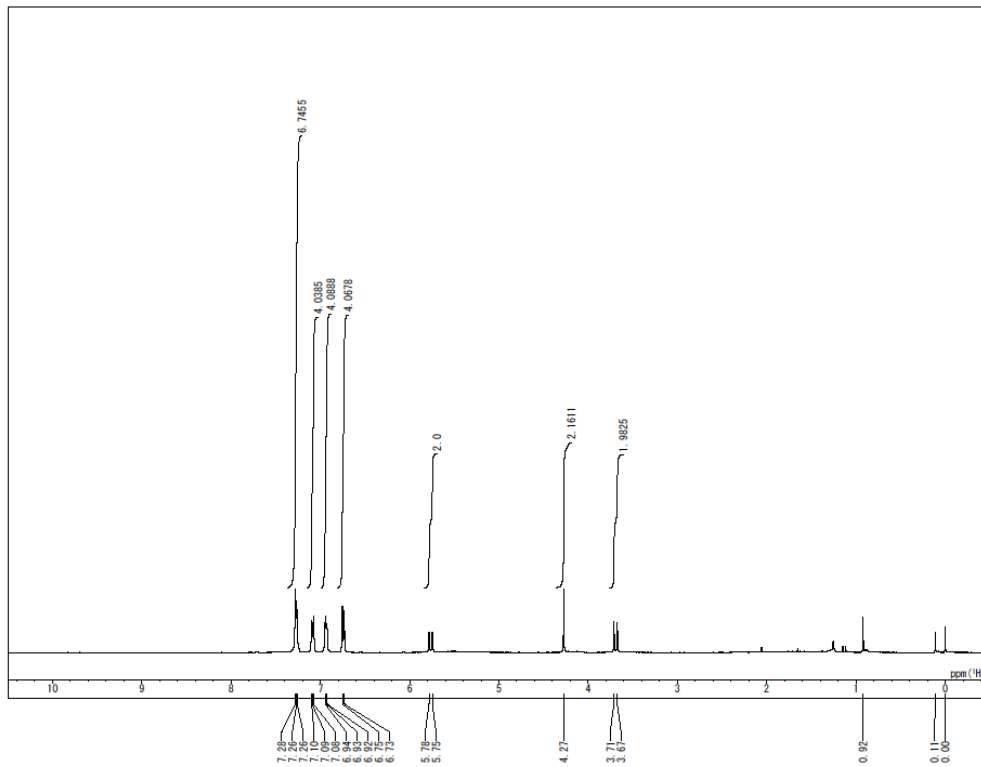

```

NAME          4c
ORNUC        400.13 MHz
ORF           0.0 kHz
ORSET        10021.89 Hz
ORFIN        15.0 µs
PW1          15.0 µs
PW2          15.0 µs
PWS          30.0 µs
P11          1.0 ms
P12          0.0 ms
P13          0.0 ms
LOOP1        0
POINT        32768
SCANS        4
DUMMY        2
FREQ        8012.82 Hz
ACQTM        4.0594 s
PD           1.0 s
RGAIN        90
BF           0.25 Hz
EXMOD        ZG30
IRNUC        OFF
IFB           0.0 MHz
IRSET        0.0 kHz
IRFIN        0.0 Hz
IRPFW        0 µs
IRATN        0
CSFED        20.0 Hz
CTEMP        22.61 °C
PRNT_DATE    2022/Jun/02 23:41:07
    
```

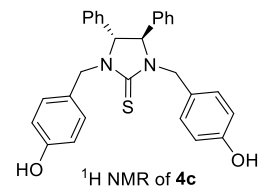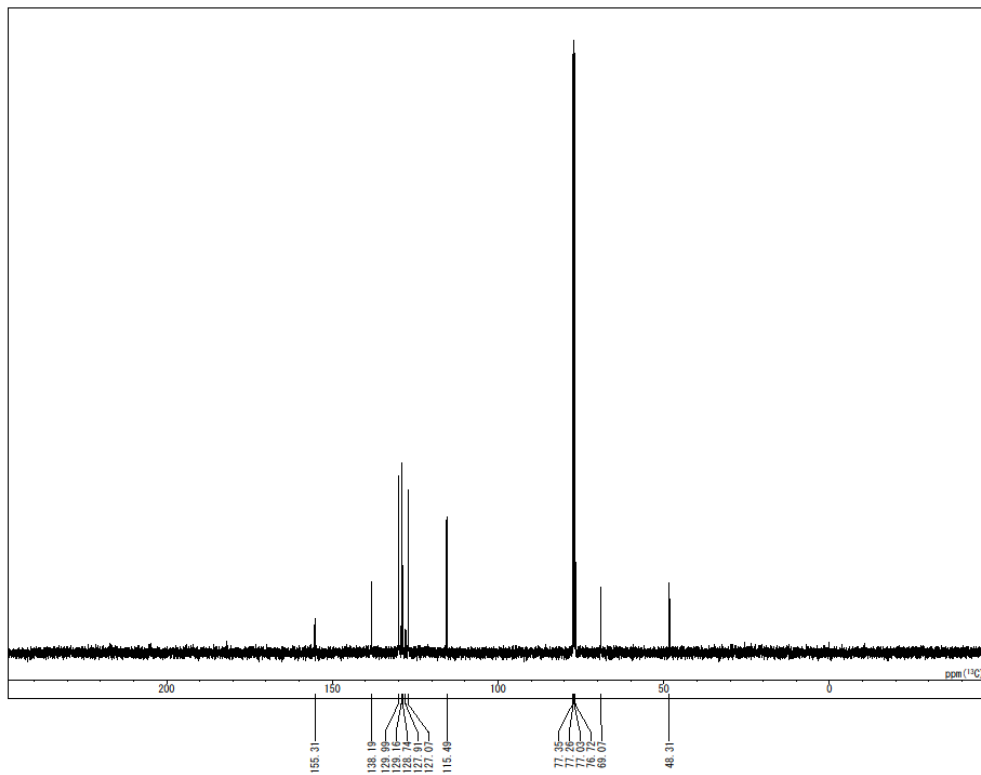

```

NAME          4c
ORNUC        100.61 MHz
ORF           0.0 kHz
ORSET        9999.159 Hz
ORFIN        10.0 µs
PW1          10.0 µs
PW2          10.0 µs
PWS          20.0 µs
P11          2.0 ms
P12          0.0035 ms
P13          0.0 ms
LOOP1        0
POINT        32768
SCANS        256
DUMMY        2
FREQ        29761.9 Hz
ACQTM        1.101 s
PD           2.0 s
RGAIN        114
BF           0.25 Hz
EXMOD        ZPG30
IRNUC        OFF
IFB           0.0 MHz
IRSET        0.0 kHz
IRFIN        0.0 Hz
IRPFW        0 µs
IRATN        0
CSFED        20.0 Hz
CTEMP        22.81 °C
PRNT_DATE    2022/Jun/02 23:37:49
    
```

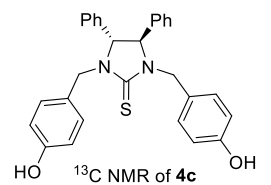

# Supporting Information II

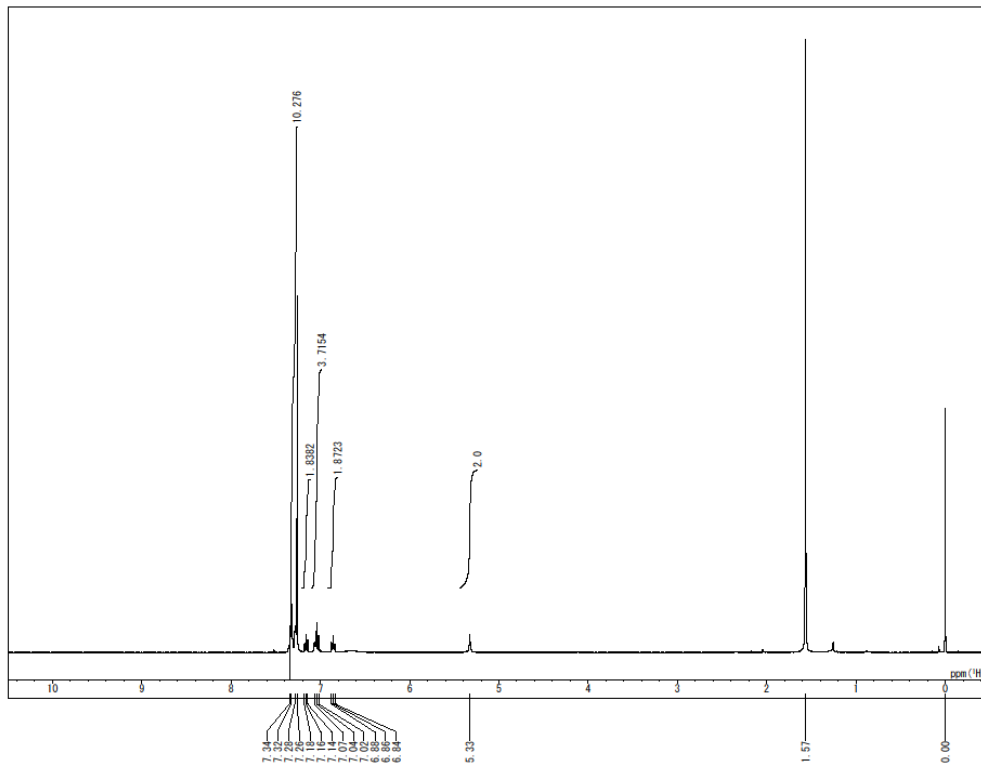

```

D:\FILE Y:\INDIVIDUALLY\資料\測定\測定データ\
ORGFIL Y:\INDIVIDUALLY\資料\測定\測定データ\
DATIM 22/Jun/2022 21:50:56
COMNT
ORNUC 1H
QFR 400.03 MHz
ORSET 0.0 kHz
ORFIN 10000.25 Hz
PW1 2.6667 μs
PW2 8.0 μs
PW3 16.0 μs
P11 1.0 ms
P12 0.0 ms
P13 0.0 ms
LOOP1 0
POINT 65536
SCANS 8
DUMMY 2
FREQ 7812.5 Hz
ACQTM 8.2886 s
PD 1.0 s
RGAIN 101
BF 0.0596 Hz
EMOD ZG30
IRNUC OFF
IFR 0.0 MHz
IRSET 0.0 kHz
IRFIN 0.0 Hz
IRPW 0 μs
IRATN 0
CSFED 0.0 Hz
CTMP 24.2965 °C
PRNT_DATE 2022/Jun/22 22:05:53
    
```

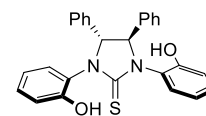

<sup>1</sup>H NMR of 4d

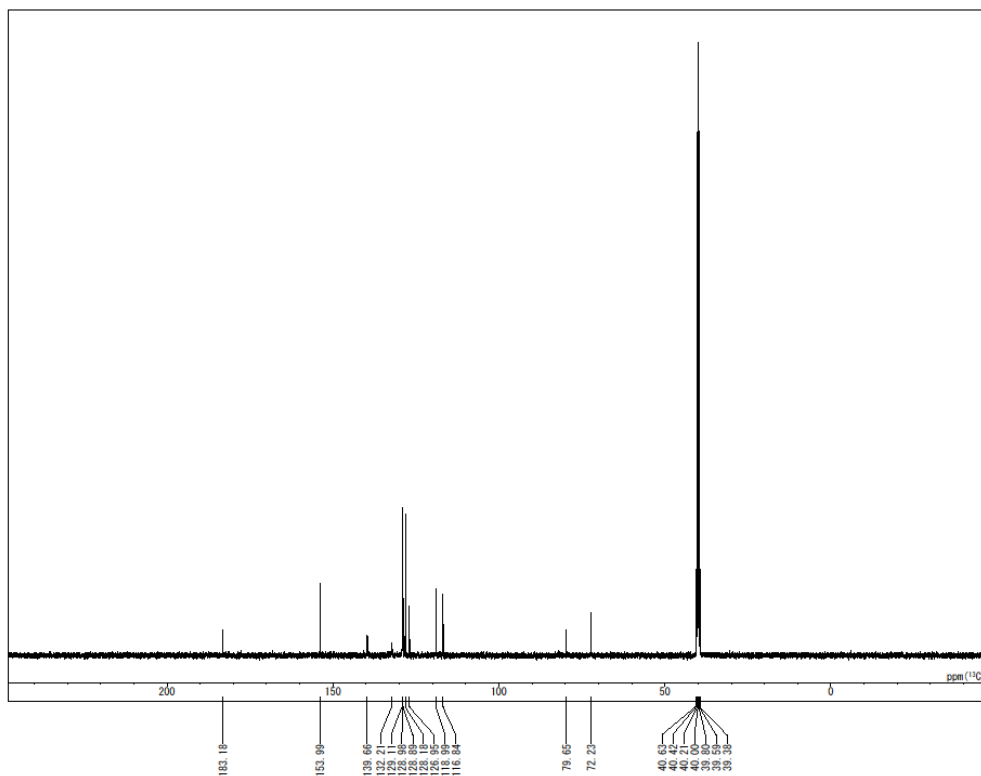

```

D:\FILE X:\06208\DATA\06208\NMR\MSS196C-NMR-D-D
ORGFIL X:\06208\DATA\06208\NMR\MSS196C-NMR-D
DATIM 22/Jun/2022 09:57:47
COMNT
ORNUC 13C
QFR 100.61 MHz
ORSET 0.0 kHz
ORFIN 9999.159 Hz
PW1 10.0 μs
PW2 10.0 μs
PW3 20.0 μs
P11 2.0 ms
P12 0.0035 ms
P13 0.0 ms
LOOP1 0
POINT 32768
SCANS 256
DUMMY 2
FREQ 29761.9 Hz
ACQTM 1.101 s
PD 2.0 s
RGAIN 203
BF 0.25 Hz
EMOD ZGFC30
IRNUC OFF
IFR 0.0 MHz
IRSET 0.0 kHz
IRFIN 0.0 Hz
IRPW 0 μs
IRATN 0
CSFED 20.0 Hz
CTMP 26.81 °C
PRNT_DATE 2022/Jun/22 10:17:44
    
```

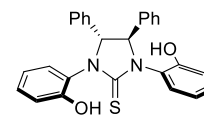

<sup>13</sup>C NMR of 4d

# Supporting Information II

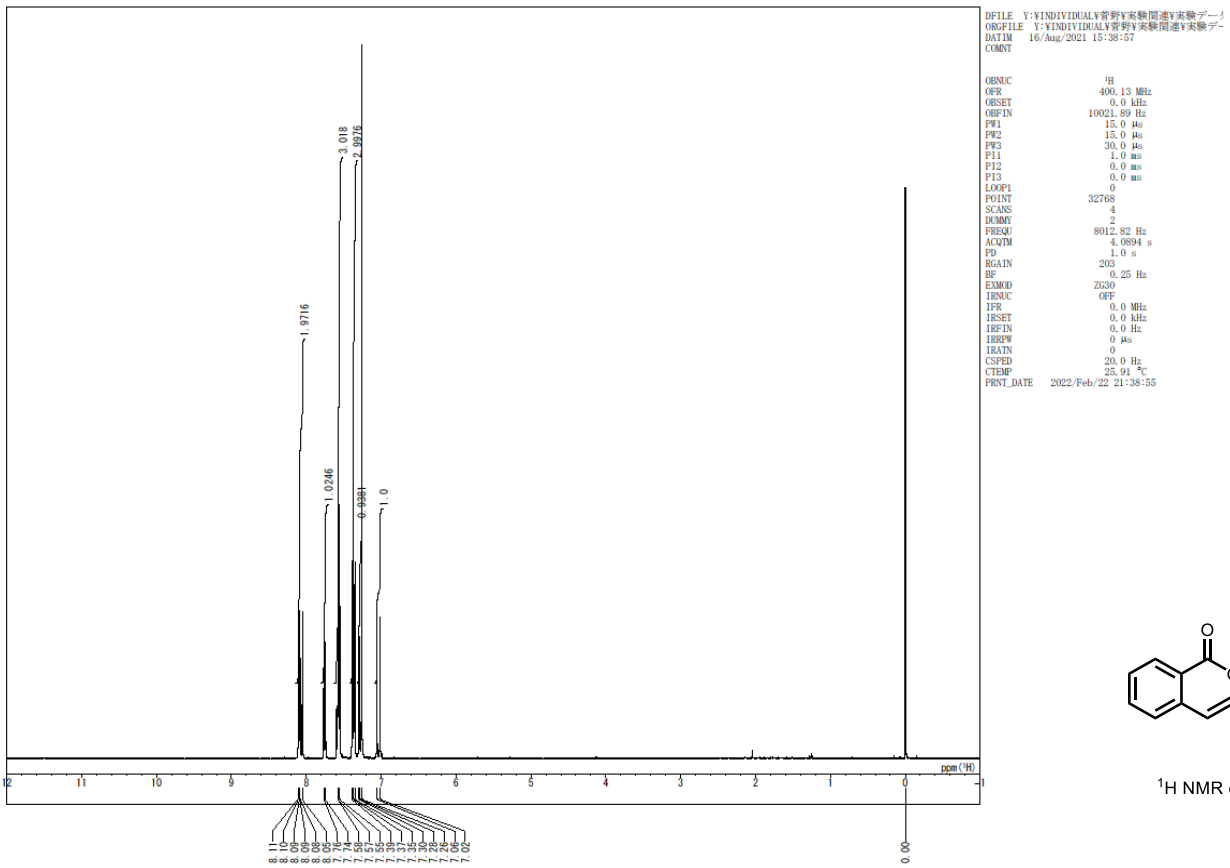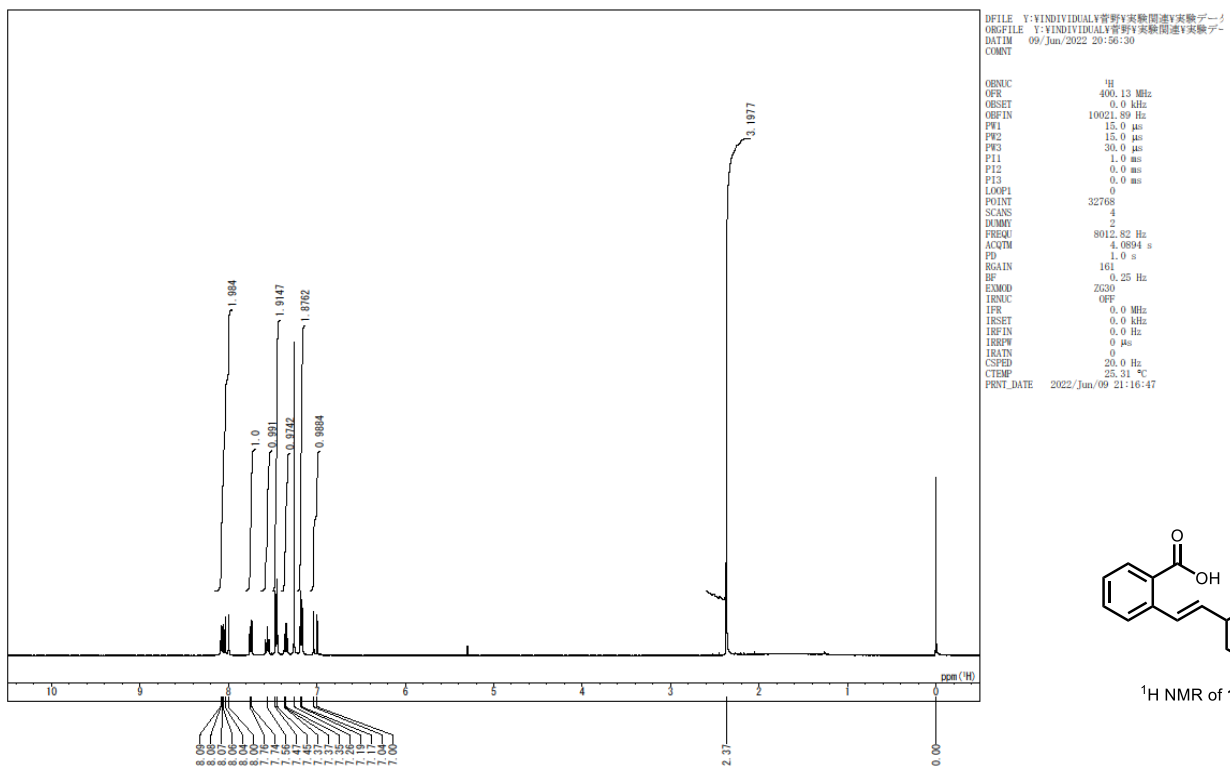

# Supporting Information II

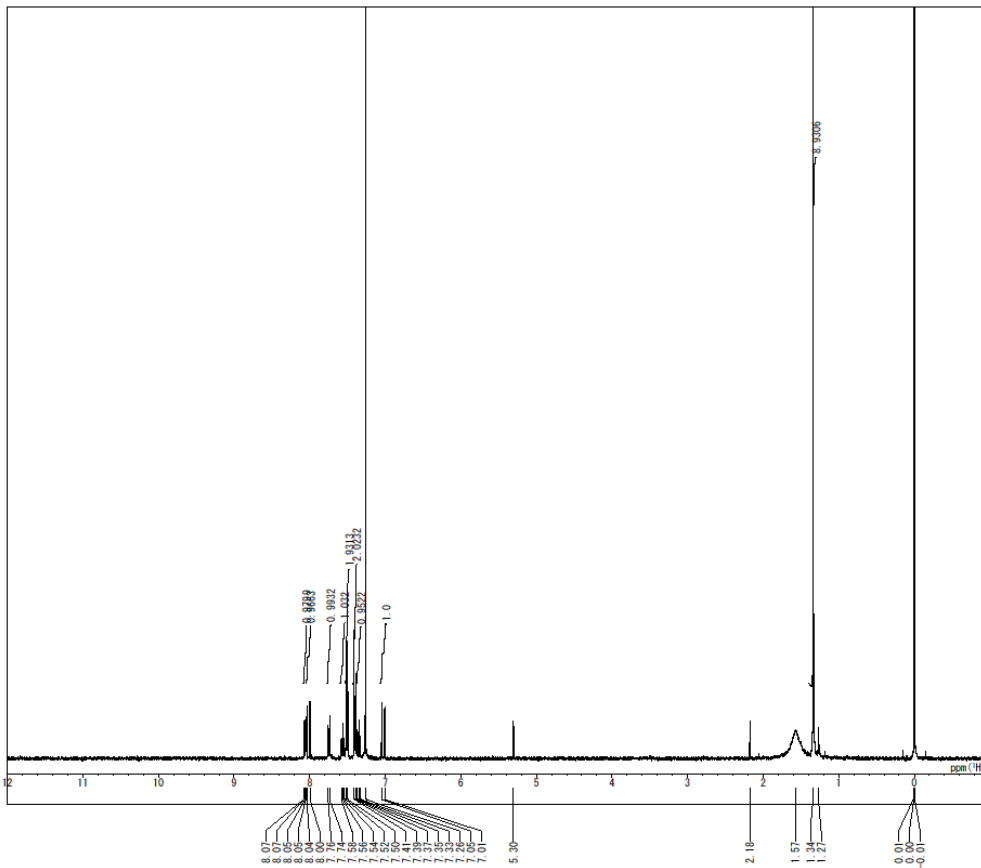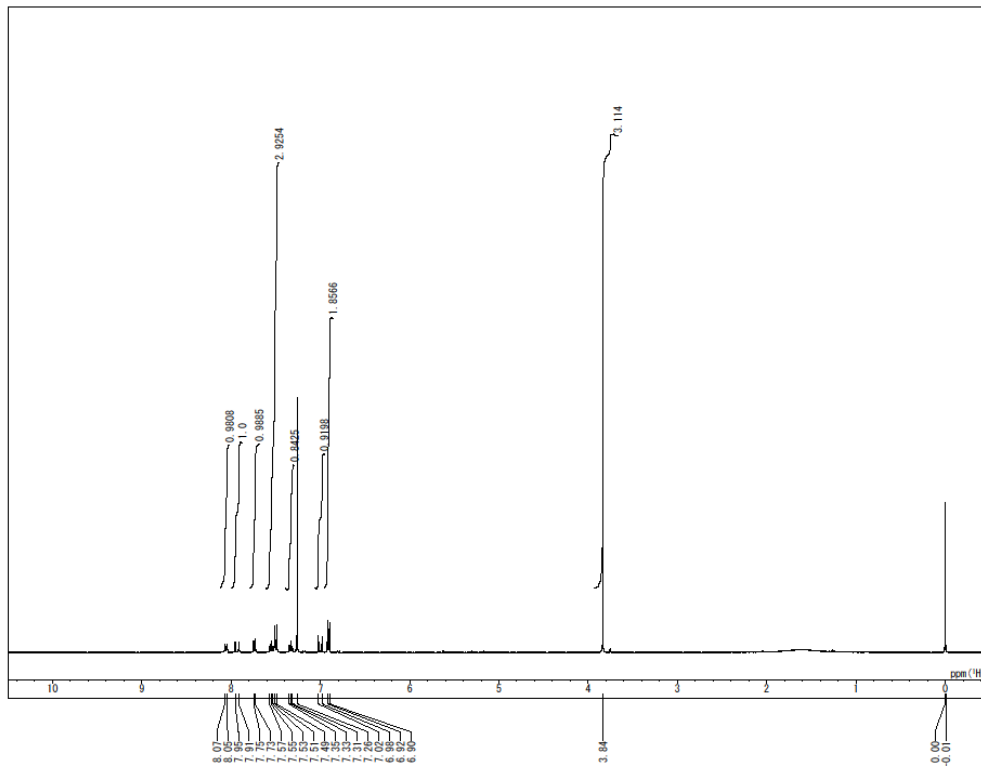

# Supporting Information II

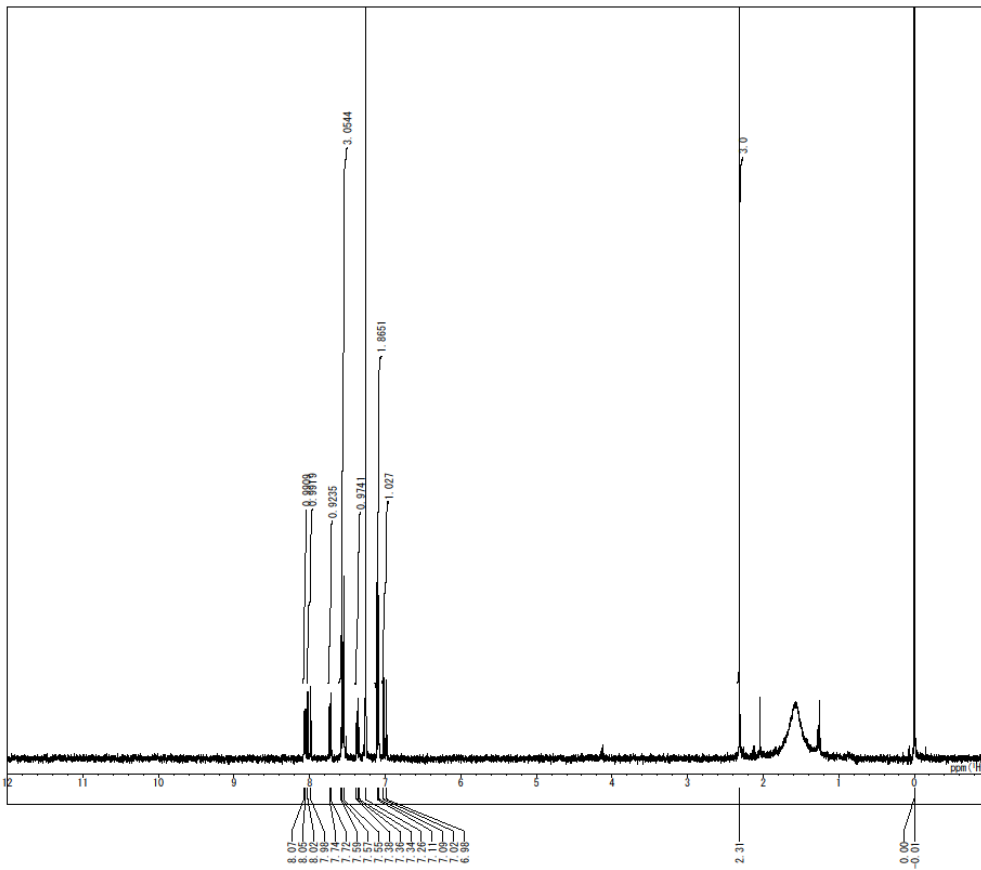

DFILE Y:\INDIVIDUALLY\實驗Y実験関連Y実験データ  
 ORGFILE Y:\INDIVIDUALLY\實驗Y実験関連Y実験データ  
 DATIM 19/Aug/2021 15:18:05  
 COMNT

ORNUC <sup>1</sup>H  
 OFR 400.13 MHz  
 ORSET 0.0 kHz  
 OFBIN 10021.89 Hz  
 PW1 15.0 μs  
 PW2 15.0 μs  
 PW3 30.0 μs  
 P11 1.0 ms  
 P12 0.0 ms  
 P13 0.0 ms  
 LOOP1 0  
 POINT 32768  
 SCANS 4  
 DOMM 2  
 FREQ 8012.82 Hz  
 ACQTM 4.0894 s  
 PD 1.0 s  
 RGAIN 203  
 BF 0.25 Hz  
 EXMOD 2630  
 INUC OFF  
 IFR 0.0 MHz  
 IRSET 0.0 kHz  
 IREFIN 0.0 Hz  
 IRRPW 0 μs  
 IRATN 0  
 CSFD 20.0 Hz  
 CTEMP 25.91 °C  
 PRNT\_DATE 2022/Feb/22 22:31:14

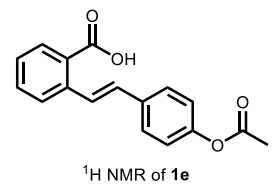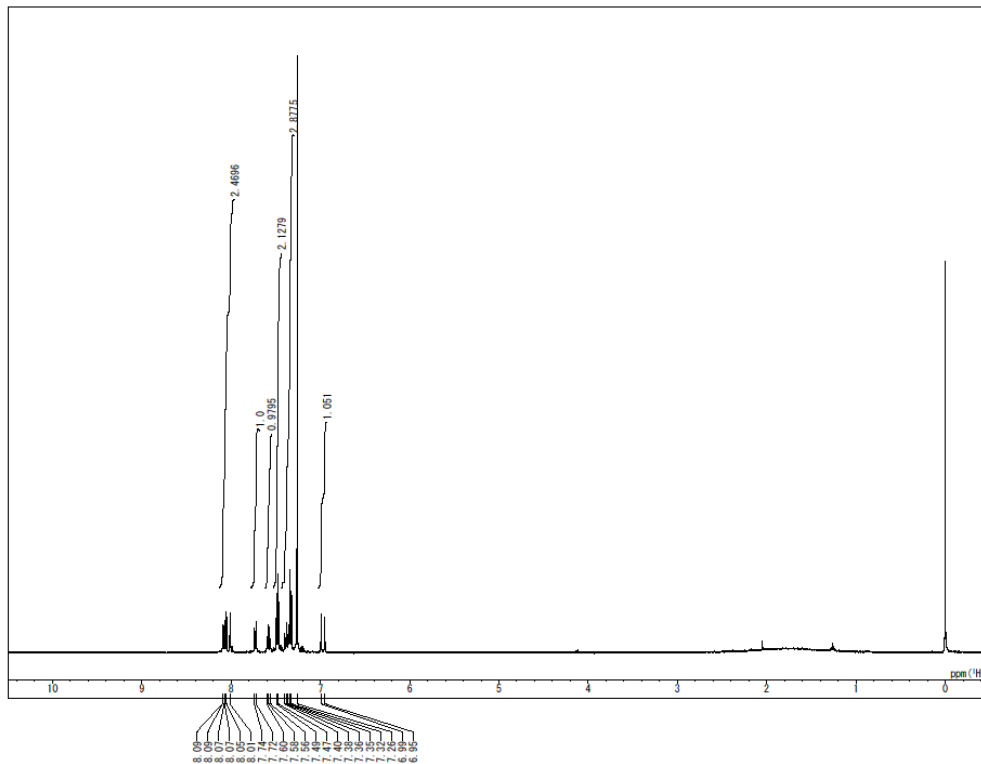

DFILE Y:\INDIVIDUALLY\實驗Y実験関連Y実験データ  
 ORGFILE Y:\INDIVIDUALLY\實驗Y実験関連Y実験データ  
 DATIM 09/Jun/2022 21:05:54  
 COMNT

ORNUC <sup>1</sup>H  
 OFR 400.13 MHz  
 ORSET 0.0 kHz  
 OFBIN 10021.89 Hz  
 PW1 15.0 μs  
 PW2 15.0 μs  
 PW3 30.0 μs  
 P11 1.0 ms  
 P12 0.0 ms  
 P13 0.0 ms  
 LOOP1 0  
 POINT 32768  
 SCANS 4  
 DOMM 2  
 FREQ 8012.82 Hz  
 ACQTM 4.0894 s  
 PD 1.0 s  
 RGAIN 161  
 BF 0.25 Hz  
 EXMOD 2630  
 INUC OFF  
 IFR 0.0 MHz  
 IRSET 0.0 kHz  
 IREFIN 0.0 Hz  
 IRRPW 0 μs  
 IRATN 0  
 CSFD 20.0 Hz  
 CTEMP 25.41 °C  
 PRNT\_DATE 2022/Jun/09 21:20:15

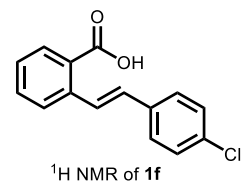

# Supporting Information II

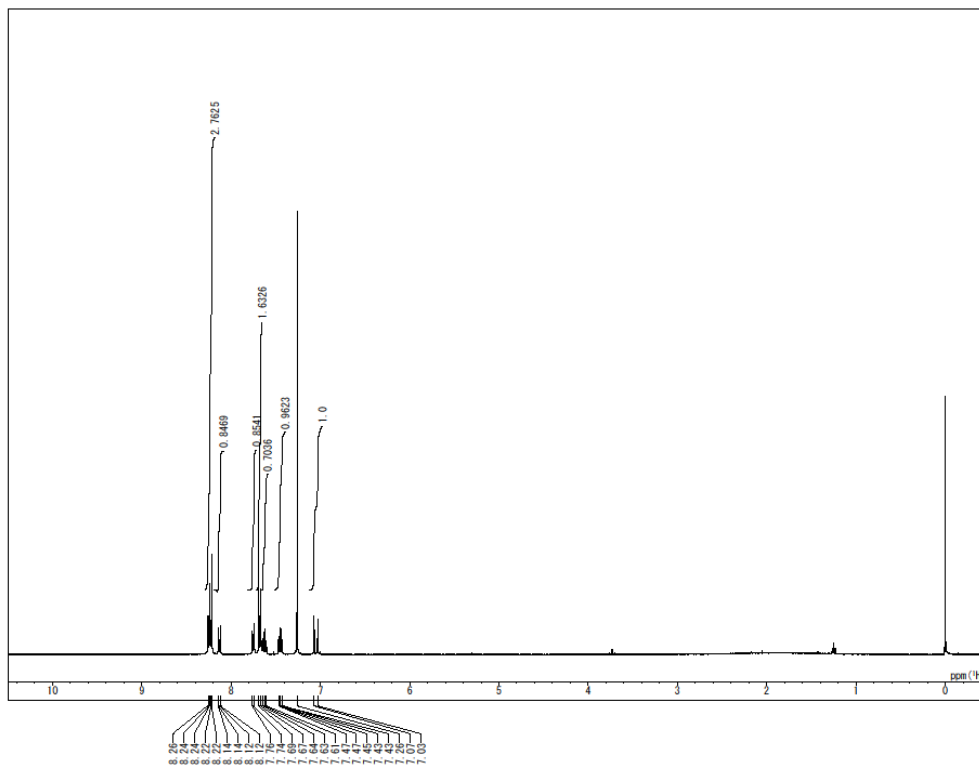

DFILE Y:\INDIVIDUALY\審野Y実験関連Y実験データ  
 ORGFILE Y:\INDIVIDUALY\審野Y実験関連Y実験データ  
 DATIM 09/Jun/2022 23:25:06  
 COMNT  
  
 OBNUC <sup>1</sup>H  
 OFR 400.13 MHz  
 OBSET 0.0 kHz  
 OFBIN 10021.89 Hz  
 PW1 15.0 μs  
 PW2 15.0 μs  
 PW3 30.0 μs  
 P11 1.0 ms  
 P12 0.0 ms  
 P13 0.0 ms  
 LOOP1 0  
 POINT 32768  
 SCANS 4  
 DUMM 2  
 FREQU 8012.82 Hz  
 ACQTM 4.0894 s  
 PD 1.0 s  
 RGAIN 161  
 BF 0.25 Hz  
 EXMOD 2630  
 TRUC OFF  
 IFR 0.0 MHz  
 IRSET 0.0 kHz  
 IREFIN 0.0 Hz  
 IRRPW 0 μs  
 IRATN 0  
 CSFD 20.0 Hz  
 CTEMP 25.31 °C  
 PRNT\_DATE 2022/Jun/09 23:40:25

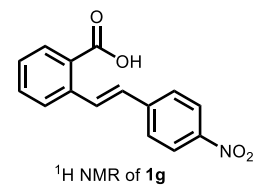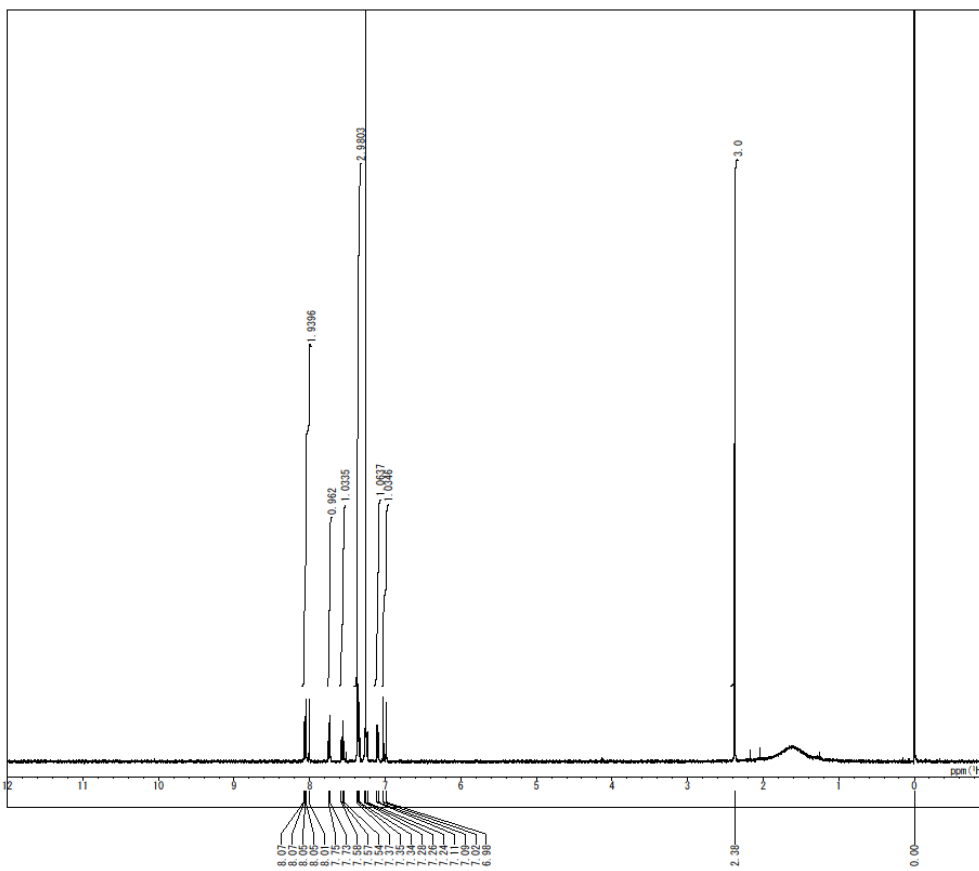

DFILE Y:\INDIVIDUALY\審野Y実験関連Y実験データ  
 ORGFILE Y:\INDIVIDUALY\審野Y実験関連Y実験データ  
 DATIM 24/Jul/2021 16:18:21  
 COMNT  
  
 OBNUC <sup>1</sup>H  
 OFR 400.13 MHz  
 OBSET 0.0 kHz  
 OFBIN 10021.89 Hz  
 PW1 15.0 μs  
 PW2 15.0 μs  
 PW3 30.0 μs  
 P11 1.0 ms  
 P12 0.0 ms  
 P13 0.0 ms  
 LOOP1 0  
 POINT 32768  
 SCANS 4  
 DUMM 2  
 FREQU 8012.82 Hz  
 ACQTM 4.0894 s  
 PD 1.0 s  
 RGAIN 203  
 BF 0.25 Hz  
 EXMOD 2630  
 TRUC OFF  
 IFR 0.0 MHz  
 IRSET 0.0 kHz  
 IREFIN 0.0 Hz  
 IRRPW 0 μs  
 IRATN 0  
 CSFD 20.0 Hz  
 CTEMP 26.21 °C  
 PRNT\_DATE 2022/feb/23 00:27:06

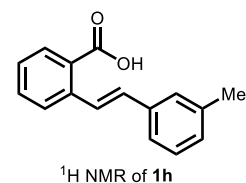

# Supporting Information II

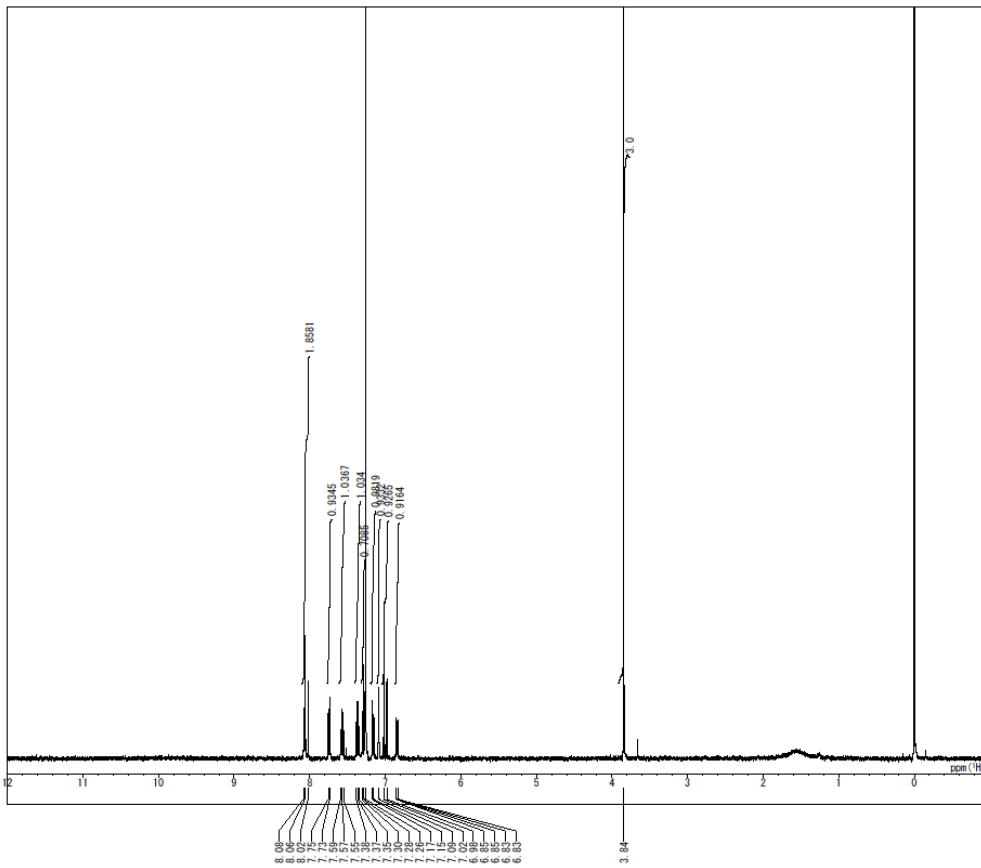

DFILE Y:\INDIVIDUALLY\實驗\実験関連\実験データ  
 ORGFILE Y:\INDIVIDUALLY\實驗\実験関連\実験データ  
 DATIM 02/Aug/2021 17:13:49  
 COMNT  
 OBNUC <sup>1</sup>H  
 OFR 400.13 MHz  
 OSSET 0.0 kHz  
 OFBIN 10021.89 Hz  
 PW1 15.0  $\mu$ s  
 PW2 15.0  $\mu$ s  
 PW3 30.0  $\mu$ s  
 P11 1.0 ms  
 P12 0.0 ms  
 P13 0.0 ms  
 LOOP1 0  
 POINT 32768  
 SCANS 4  
 DDMF 2  
 FREQU 8012.82 Hz  
 ACQTM 4.0894 s  
 PD 1.0 s  
 RGAIN 203  
 BF 0.25 Hz  
 EXMOD 2630  
 INUC OFF  
 IFR 0.0 MHz  
 IRSET 0.0 kHz  
 IREFIN 0.0 Hz  
 IRRPW 0  $\mu$ s  
 IRATN 0  
 CSFED 20.0 Hz  
 CTEMP 27.21  $^{\circ}$ C  
 PRNT\_DATE 2022/Feb/23 00:23:40

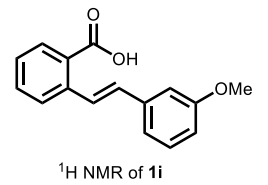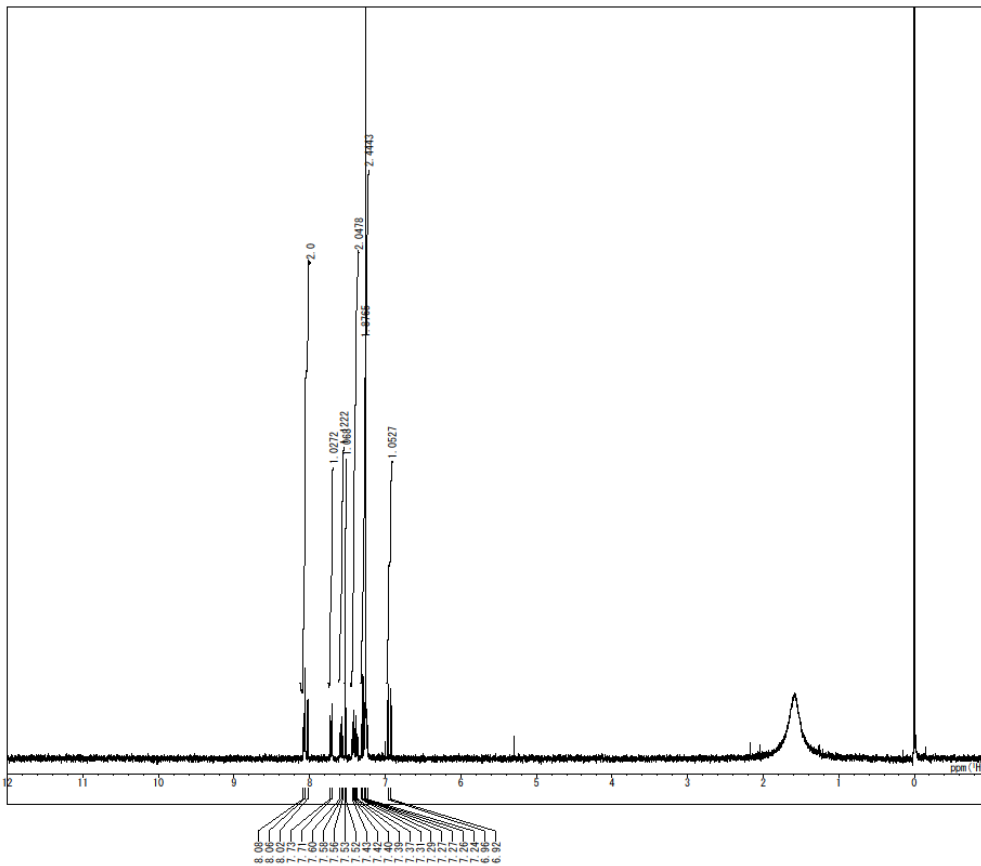

DFILE Y:\INDIVIDUALLY\實驗\実験関連\実験データ  
 ORGFILE Y:\INDIVIDUALLY\實驗\実験関連\実験データ  
 DATIM 13/Jul/2021 11:33:21  
 COMNT  
 OBNUC <sup>1</sup>H  
 OFR 400.13 MHz  
 OSSET 0.0 kHz  
 OFBIN 10021.89 Hz  
 PW1 15.0  $\mu$ s  
 PW2 15.0  $\mu$ s  
 PW3 30.0  $\mu$ s  
 P11 1.0 ms  
 P12 0.0 ms  
 P13 0.0 ms  
 LOOP1 0  
 POINT 32768  
 SCANS 4  
 DDMF 2  
 FREQU 8012.82 Hz  
 ACQTM 4.0894 s  
 PD 1.0 s  
 RGAIN 203  
 BF 0.25 Hz  
 EXMOD 2630  
 INUC OFF  
 IFR 0.0 MHz  
 IRSET 0.0 kHz  
 IREFIN 0.0 Hz  
 IRRPW 0  $\mu$ s  
 IRATN 0  
 CSFED 20.0 Hz  
 CTEMP 25.91  $^{\circ}$ C  
 PRNT\_DATE 2022/Feb/22 22:12:30

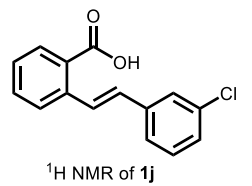

# Supporting Information II

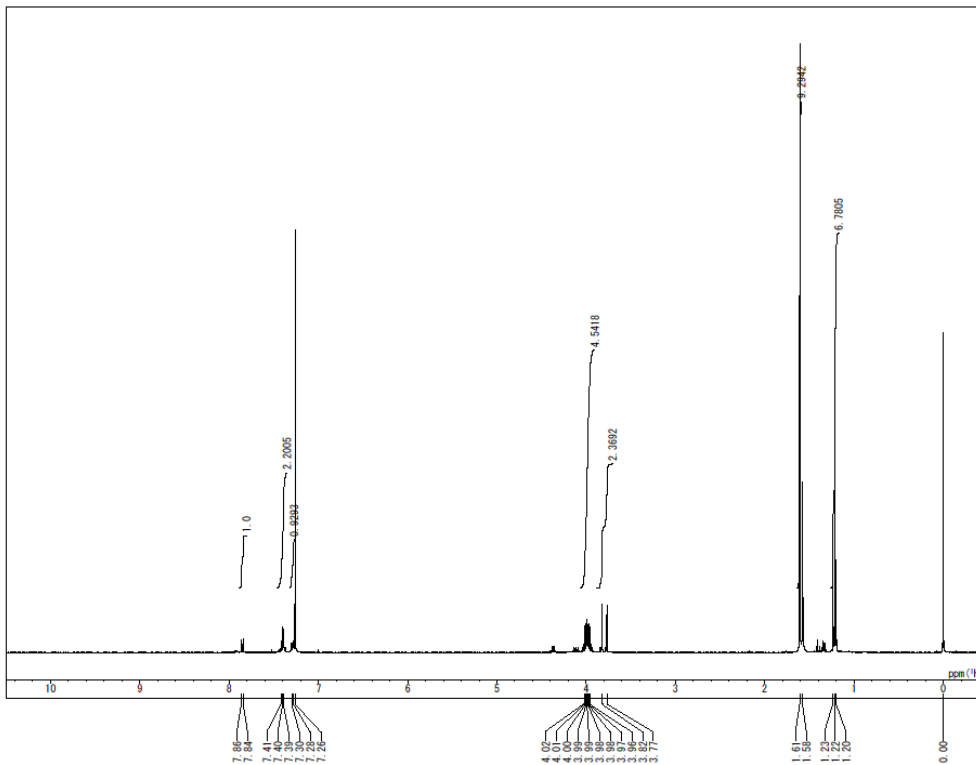

D:\FILE Y:\INDIVIDUALLY\菅野Y実験関連\Y実験データ  
 ORF\FILE Y:\INDIVIDUALLY\菅野Y実験関連\Y実験データ  
 DATIM 17/Jun/2022 09:14:25  
 COMNT  
 ORNUC <sup>1</sup>H  
 OFR 400.13 MHz  
 OSSET 0.0 kHz  
 OFBIN 10021.89 Hz  
 PW1 15.0 μs  
 PW2 15.0 μs  
 PW3 30.0 μs  
 P11 1.0 ms  
 P12 0.0 ms  
 P13 0.0 ms  
 LOOP1 0  
 POINT 32768  
 SCANS 24  
 DDMF 2  
 FREQ 8012.82 Hz  
 ACQTM 4.0894 s  
 PD 1.0 s  
 RGAIN 161  
 BF 0.25 Hz  
 EXMOD 2630  
 INUC OFF  
 IFR 0.0 MHz  
 IRSET 0.0 kHz  
 IREFIN 0.0 Hz  
 IRRPW 0 μs  
 IRATN 0  
 CSFED 20.0 Hz  
 CTEMP 25.41 °C  
 PRNT\_DATE 2022/Jun/17 10:52:16

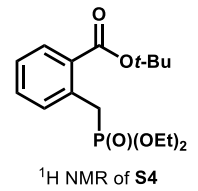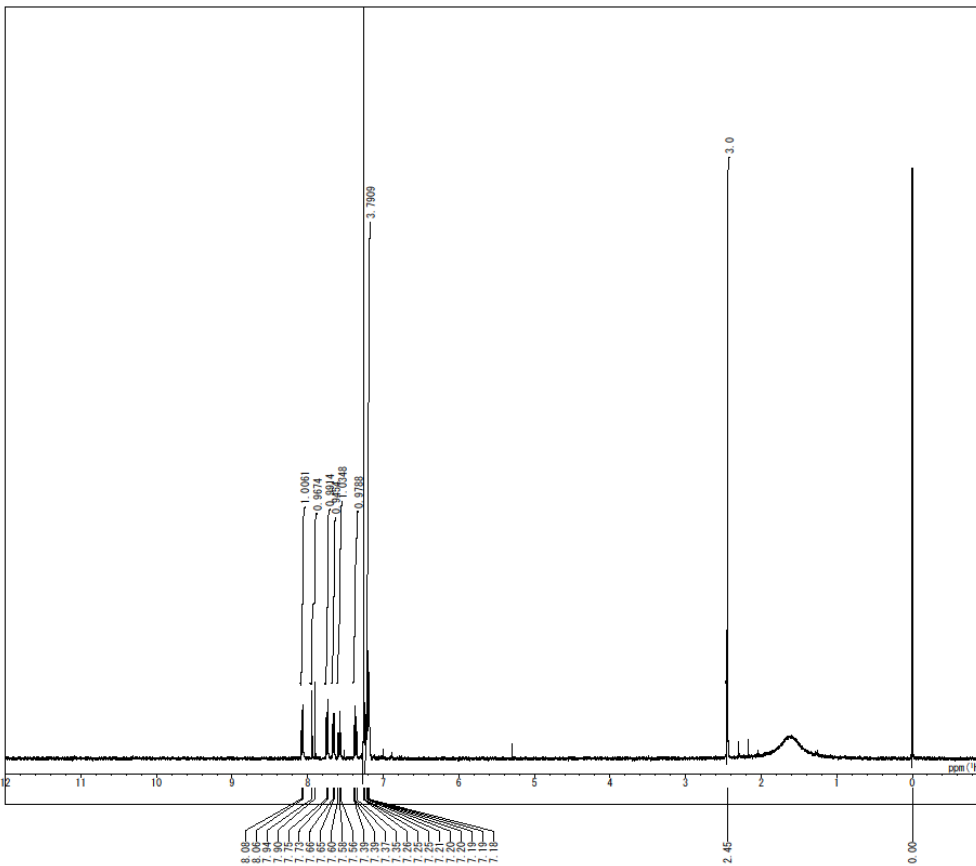

D:\FILE Y:\INDIVIDUALLY\菅野Y実験関連\Y実験データ  
 ORF\FILE Y:\INDIVIDUALLY\菅野Y実験関連\Y実験データ  
 DATIM 06/Sep/2021 10:57:06  
 COMNT  
 ORNUC <sup>1</sup>H  
 OFR 400.13 MHz  
 OSSET 0.0 kHz  
 OFBIN 10021.89 Hz  
 PW1 15.0 μs  
 PW2 15.0 μs  
 PW3 30.0 μs  
 P11 1.0 ms  
 P12 0.0 ms  
 P13 0.0 ms  
 LOOP1 0  
 POINT 32768  
 SCANS 4  
 DDMF 2  
 FREQ 8012.82 Hz  
 ACQTM 4.0894 s  
 PD 1.0 s  
 RGAIN 203  
 BF 0.25 Hz  
 EXMOD 2630  
 INUC OFF  
 IFR 0.0 MHz  
 IRSET 0.0 kHz  
 IREFIN 0.0 Hz  
 IRRPW 0 μs  
 IRATN 0  
 CSFED 20.0 Hz  
 CTEMP 26.01 °C  
 PRNT\_DATE 2022/Feb/22 22:08:45

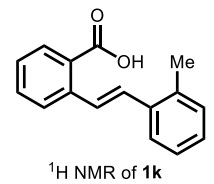



# Supporting Information II

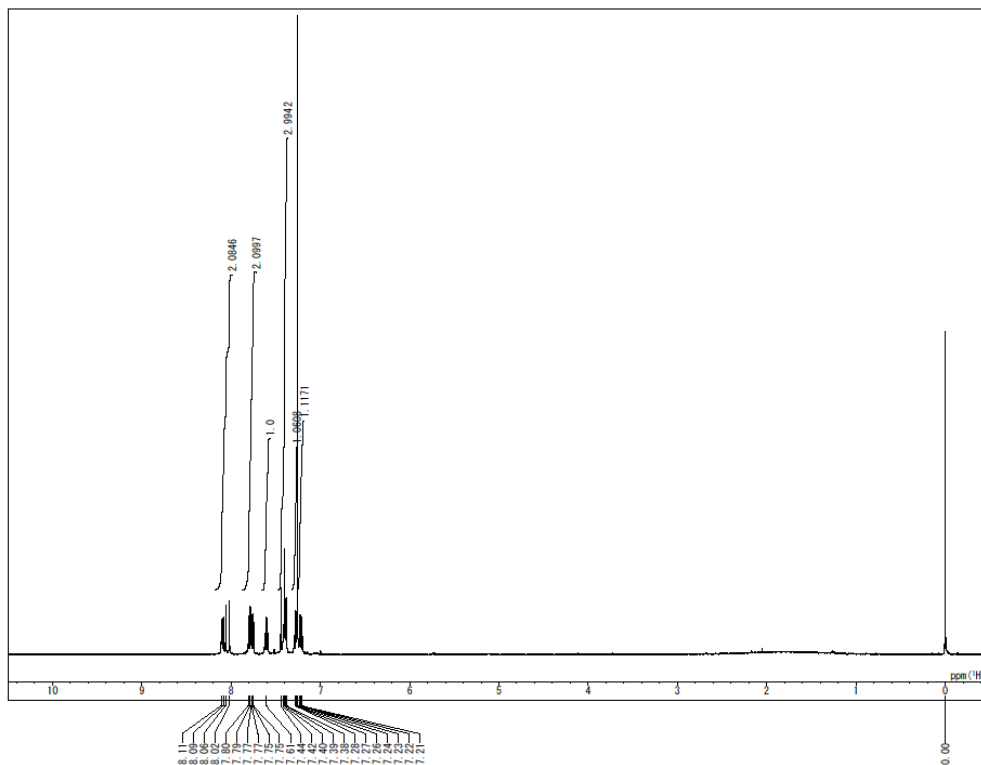

D:\FILE Y:\INDIVIDUALLY\實驗\測定\実験データ  
 ORGFILE Y:\INDIVIDUALLY\實驗\測定\実験データ  
 DATE 09/Jun/2022 23:21:29  
 COMNT  
  
 OBNUC <sup>1</sup>H  
 OFR 400.13 MHz  
 OBSSET 0.0 kHz  
 OFBIN 10021.89 Hz  
 PW1 15.0 μs  
 PW2 15.0 μs  
 PW3 30.0 μs  
 P11 1.0 ms  
 P12 0.0 ms  
 P13 0.0 ms  
 LOOP1 0  
 POINT 32768  
 SCANS 4  
 DDMF 2  
 FREQ 8012.82 Hz  
 ACQTM 4.0894 s  
 PD 1.0 s  
 RGAIN 161  
 BF 0.25 Hz  
 EXMOD ZG30  
 TRUC OFF  
 IFR 0.0 MHz  
 IRSET 0.0 kHz  
 IREFIN 0.0 Hz  
 IRRFW 0 μs  
 IRATN 0  
 CSFED 20.0 Hz  
 CTEMP 25.31 °C  
 PRNT\_DATE 2022/Jun/09 23:50:00

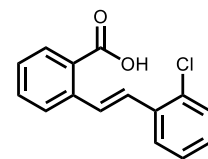

<sup>1</sup>H NMR of 11

# Supporting Information II

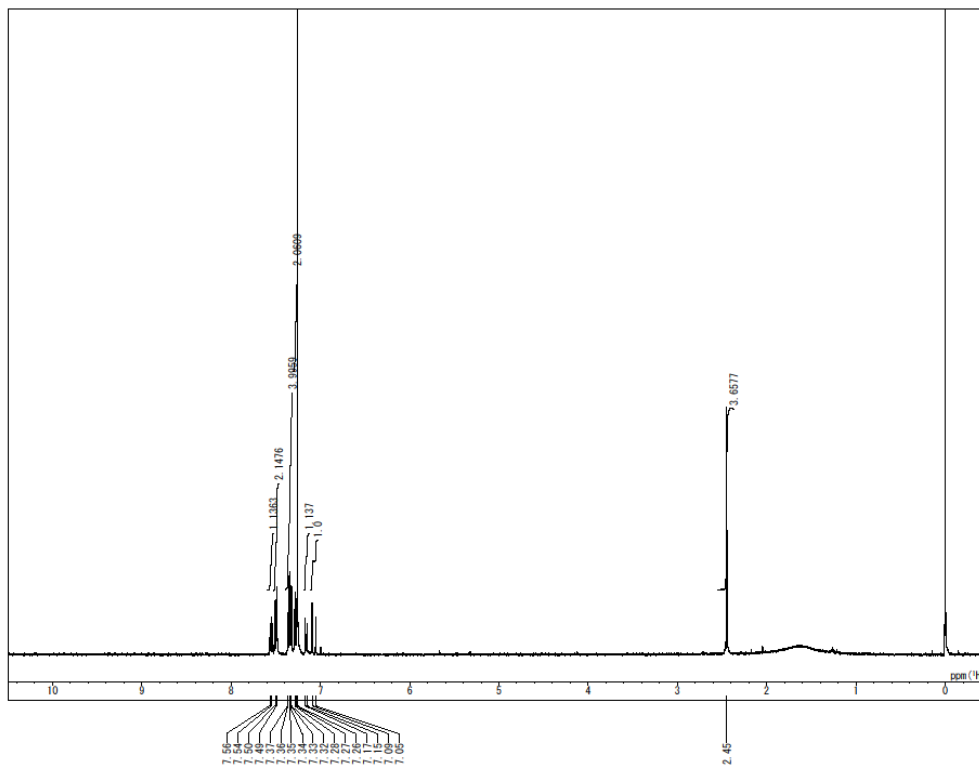

D:\FILE Y:\INDIVIDUALLY\菅野Y実験関連Y実験データ  
 ORF\FILE Y:\INDIVIDUALLY\菅野Y実験関連Y実験データ  
 DATIM 15/Jan/2022 14:26:57  
 COMNT  
 ORNUC <sup>1</sup>H  
 OFR 400.13 MHz  
 ORSET 0.0 kHz  
 OFBIN 10021.89 Hz  
 PW1 15.0 μs  
 PW2 15.0 μs  
 PW3 30.0 μs  
 P11 1.0 ms  
 P12 0.0 ms  
 P13 0.0 ms  
 LOOP1 0  
 POINT 32768  
 SCANS 4  
 DOMM 2  
 FREQ 8012.22 Hz  
 ACQTM 4.0894 s  
 FD 1.0 s  
 RGAIN 181  
 BF 0.25 Hz  
 EXMOD ZG30  
 TRUC OFF  
 IFR 0.0 MHz  
 IRSET 0.0 kHz  
 IREFIN 0.0 Hz  
 IRRPW 0 μs  
 IRATN 0  
 CSFED 20.0 Hz  
 CTEMP 26.01 °C  
 PRNT\_DATE 2022/Jan/15 15:33:35

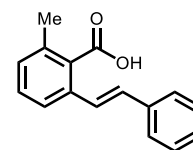

<sup>1</sup>H NMR of 1m

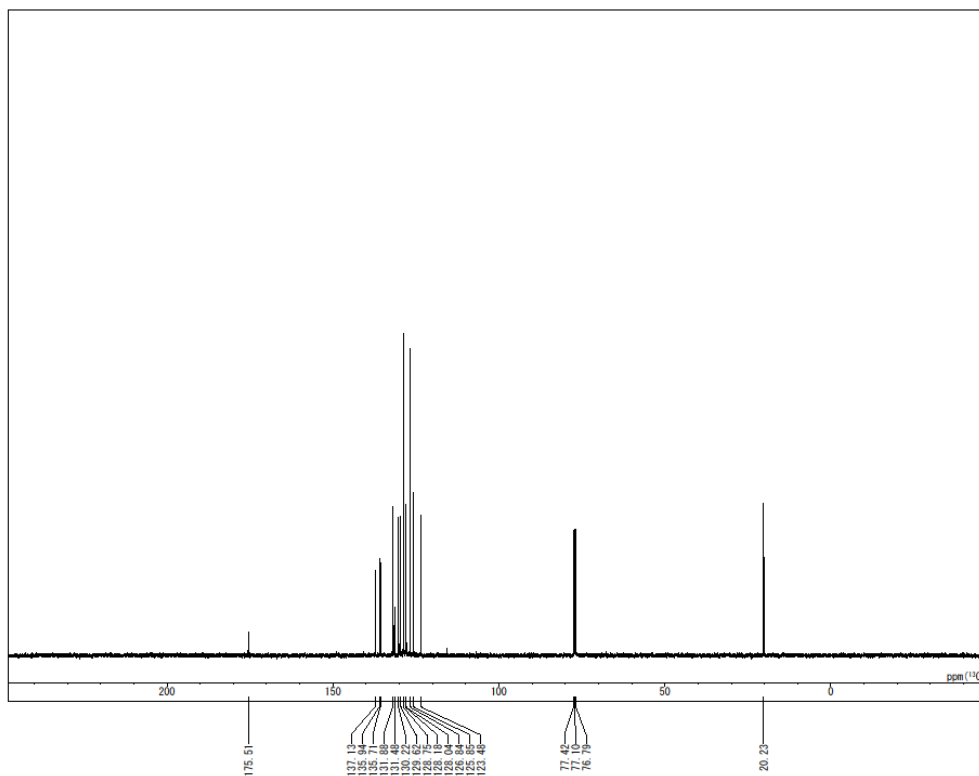

D:\FILE Y:\INDIVIDUALLY\菅野Y実験関連Y実験データ  
 ORF\FILE Y:\INDIVIDUALLY\菅野Y実験関連Y実験データ  
 DATIM 15/Jan/2022 16:25:32  
 COMNT  
 ORNUC <sup>13</sup>C  
 OFR 100.61 MHz  
 ORSET 0.0 kHz  
 OFBIN 9999.159 Hz  
 PW1 10.0 μs  
 PW2 10.0 μs  
 PW3 20.0 μs  
 P11 2.0 ms  
 P12 0.0035 ms  
 P13 0.0 ms  
 LOOP1 0  
 POINT 32768  
 SCANS 256  
 DOMM 2  
 FREQ 29761.9 Hz  
 ACQTM 1.101 s  
 FD 2.0 s  
 RGAIN 203  
 BF 0.25 Hz  
 EXMOD ZGPC30  
 TRUC OFF  
 IFR 0.0 MHz  
 IRSET 0.0 kHz  
 IREFIN 0.0 Hz  
 IRRPW 0 μs  
 IRATN 0  
 CSFED 20.0 Hz  
 CTEMP 26.51 °C  
 PRNT\_DATE 2022/Jan/15 17:03:30

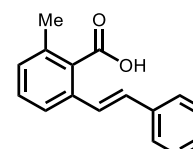

<sup>13</sup>C NMR of 1m

## Supporting Information II

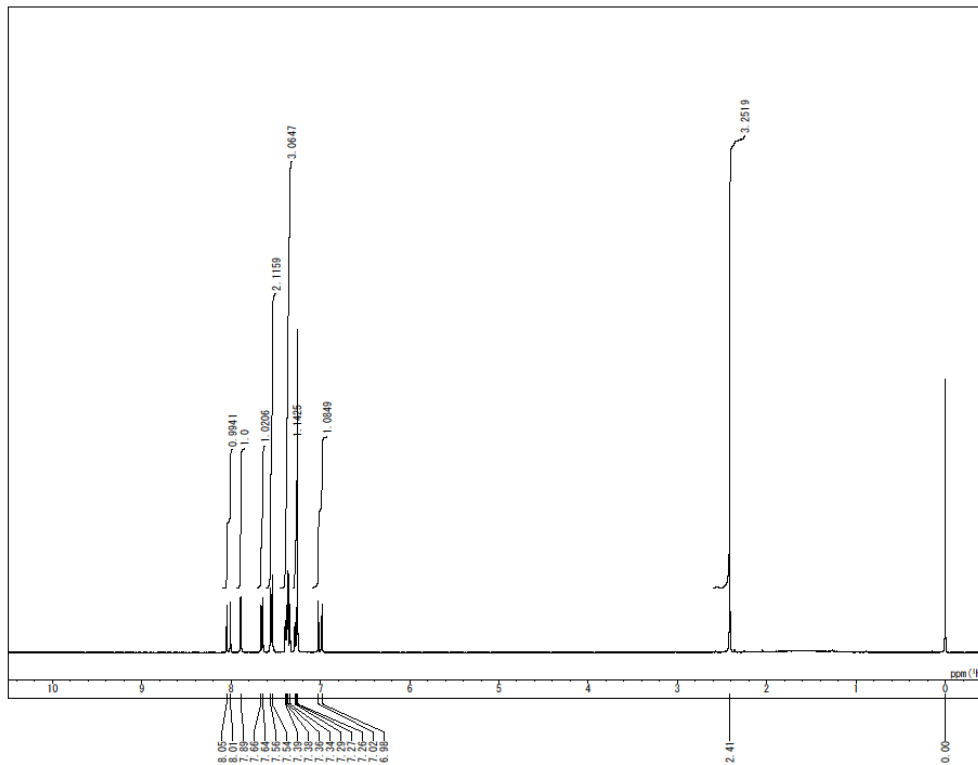

```

D:\FILE Y:\INDIVIDUALLY\菅野Y実験関連\Y実験データ\
ORF\FILE Y:\INDIVIDUALLY\菅野Y実験関連\Y実験データ\
DATIM 14/Jun/2022 22:43:26
COMNT

ORNUC 1H
ORF 400.03 MHz
ORSET 0.0 kHz
ORFIN 10009.24 Hz
PW1 2.6667 μs
PW2 8.0 μs
PW3 16.0 μs
P11 1.0 ms
P12 0.0 ms
P13 0.0 ms
LOOP1 0
POINT 65536
SCANS 4
DUMM 2
FREQ 7812.5 Hz
ACQTM 8.3886 s
FD 1.0 s
RGAIN 101
BF 0.25 Hz
EMMOD ZG30
IRNUC OFF
IFR 0.0 MHz
IRSET 0.0 kHz
IRFIN 0.0 Hz
IRPW 0 μs
IRAIN 0
CSPED 0.0 Hz
CTEMP 25.0046 °C
PRNT_DATE 2022/Jun/15 11:42:12
    
```

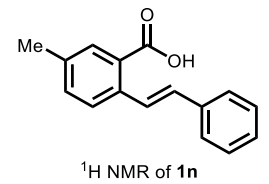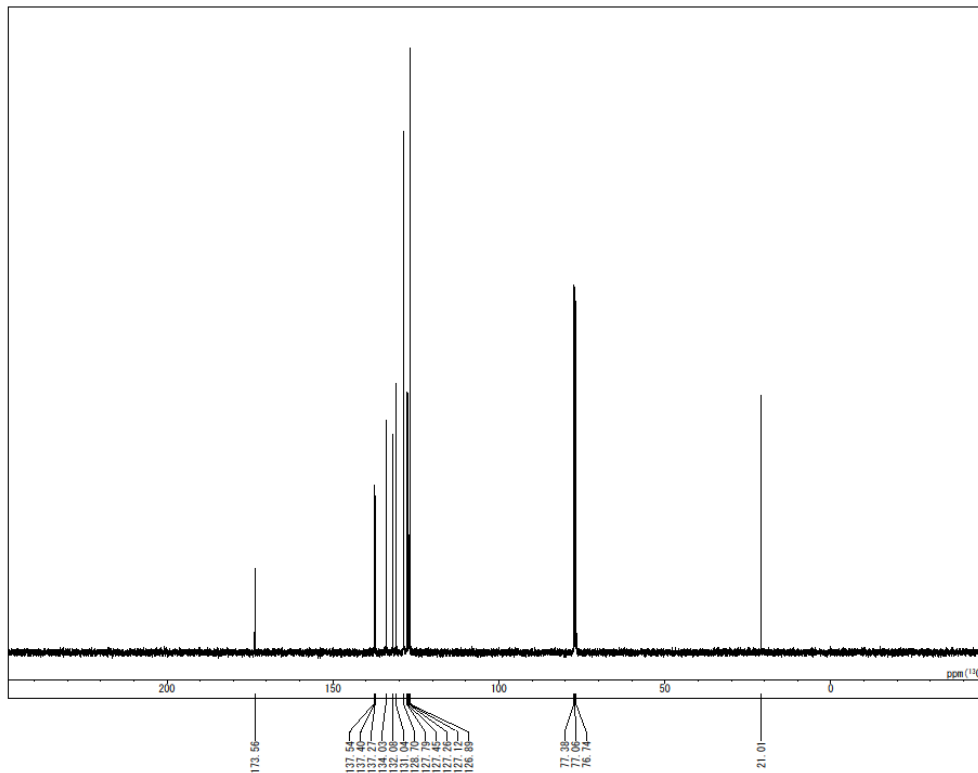

```

D:\FILE Y:\INDIVIDUALLY\菅野Y実験関連\Y実験データ\
ORF\FILE Y:\INDIVIDUALLY\菅野Y実験関連\Y実験データ\
DATIM 15/Jun/2022 00:08:56
COMNT

ORNUC 13C
ORF 100.61 MHz
ORSET 0.0 kHz
ORFIN 9999.159 Hz
PW1 10.0 μs
PW2 10.0 μs
PW3 20.0 μs
P11 2.0 ms
P12 0.0035 ms
P13 0.0 ms
LOOP1 0
POINT 32768
SCANS 256
DUMM 2
FREQ 29761.9 Hz
ACQTM 1.101 s
FD 2.0 s
RGAIN 203
BF 0.25 Hz
EMMOD ZGPG30
IRNUC OFF
IFR 0.0 MHz
IRSET 0.0 kHz
IRFIN 0.0 Hz
IRPW 0 μs
IRAIN 0
CSPED 20.0 Hz
CTEMP 25.81 °C
PRNT_DATE 2022/Jun/15 11:48:55
    
```

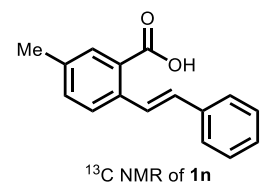

## Supporting Information II

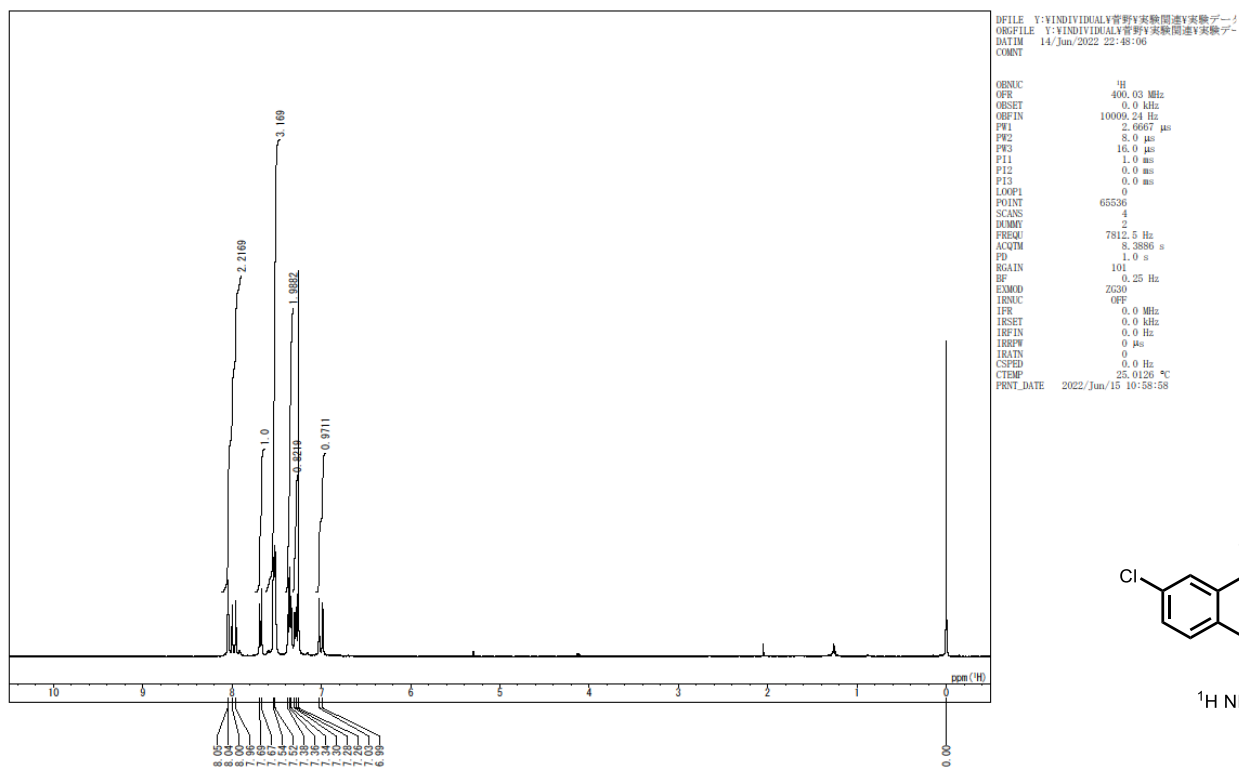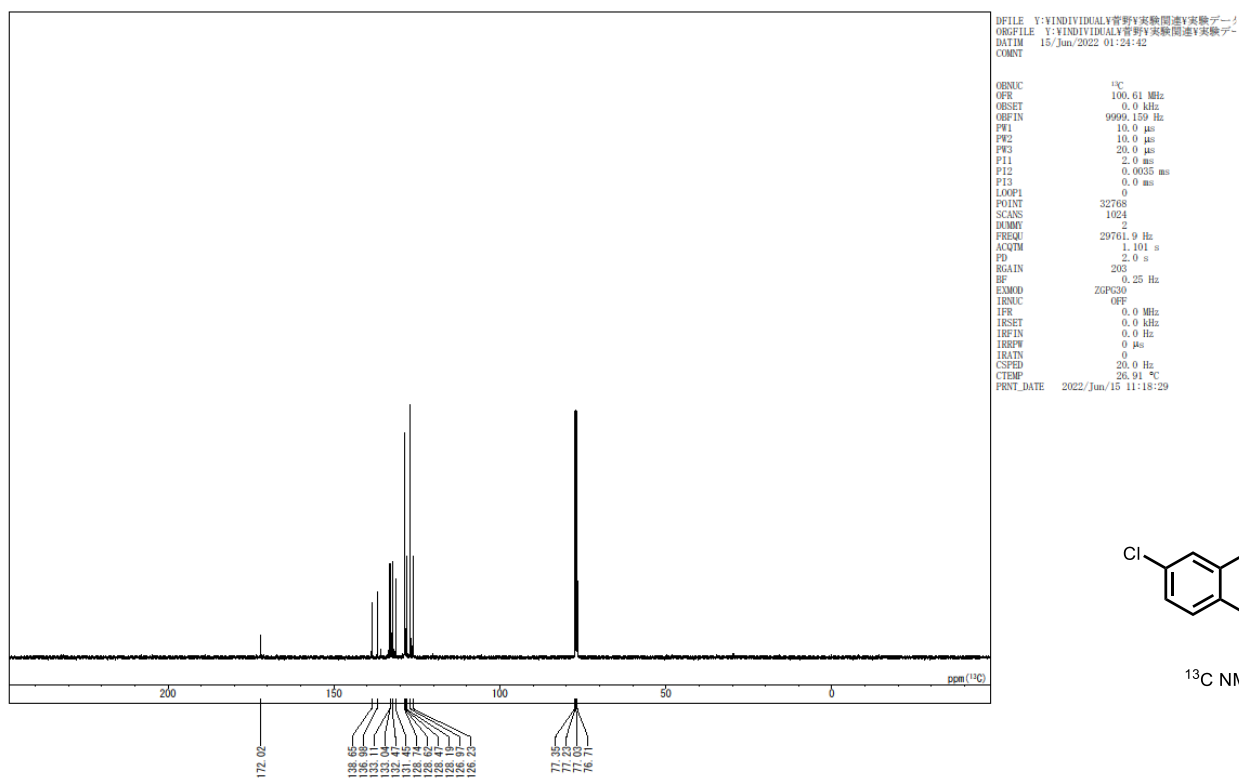

# Supporting Information II

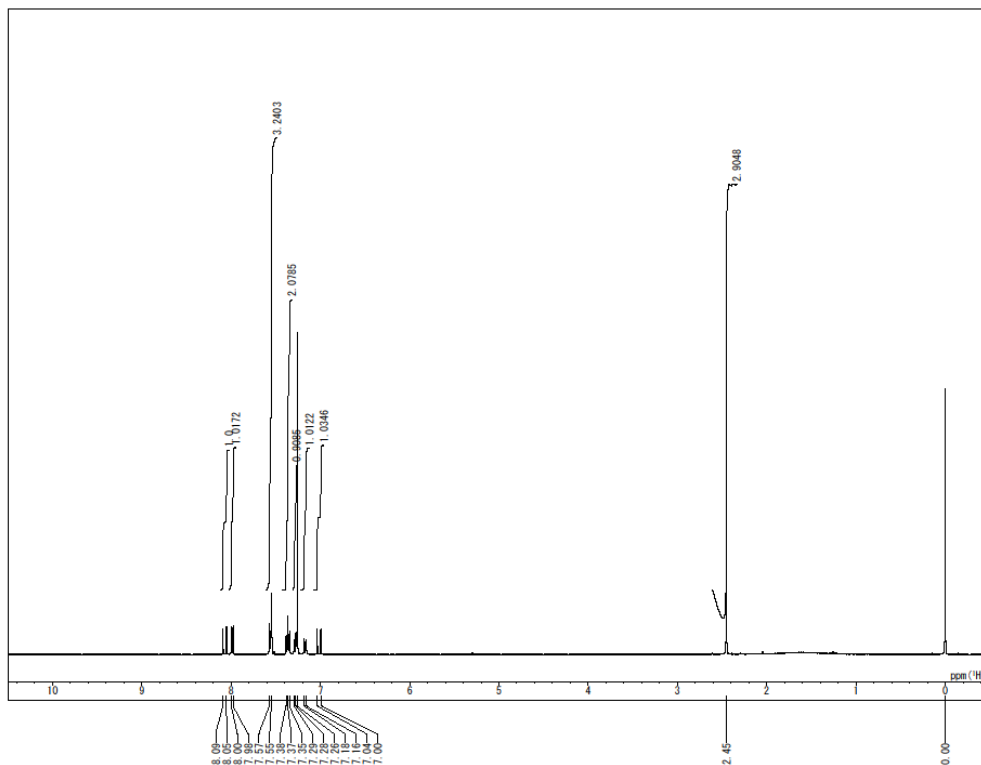

D:\FILE Y:\INDIVIDUALLY\實驗\実験関連\実験データ  
 ORGFILE Y:\INDIVIDUALLY\實驗\実験関連\実験データ  
 DATIM 14/Jun/2022 22:52:57  
 COMNT  
 ORNUC <sup>1</sup>H  
 OFR 400.00 MHz  
 ORSET 0.0 kHz  
 OFBIN 10009.24 Hz  
 PW1 2.6667 μs  
 PW2 8.0 μs  
 PW3 16.0 μs  
 P11 1.0 ms  
 P12 0.0 ms  
 P13 0.0 ms  
 LOOP1 0  
 POINT 65536  
 SCANS 4  
 DUMM 2  
 FREQ 7812.5 Hz  
 ACQIM 8.3886 s  
 PD 1.0 s  
 RGAIN 101  
 BF 0.25 Hz  
 EXMOD ZG30  
 TRNUC OFF  
 IFR 0.0 MHz  
 IRSET 0.0 kHz  
 IREFIN 0.0 Hz  
 IREFW 0 μs  
 IRATN 0  
 CSFD 0.0 Hz  
 CTEMP 25.005 °C  
 PRNT\_DATE 2022/Jun/15 10:32:27

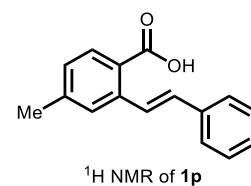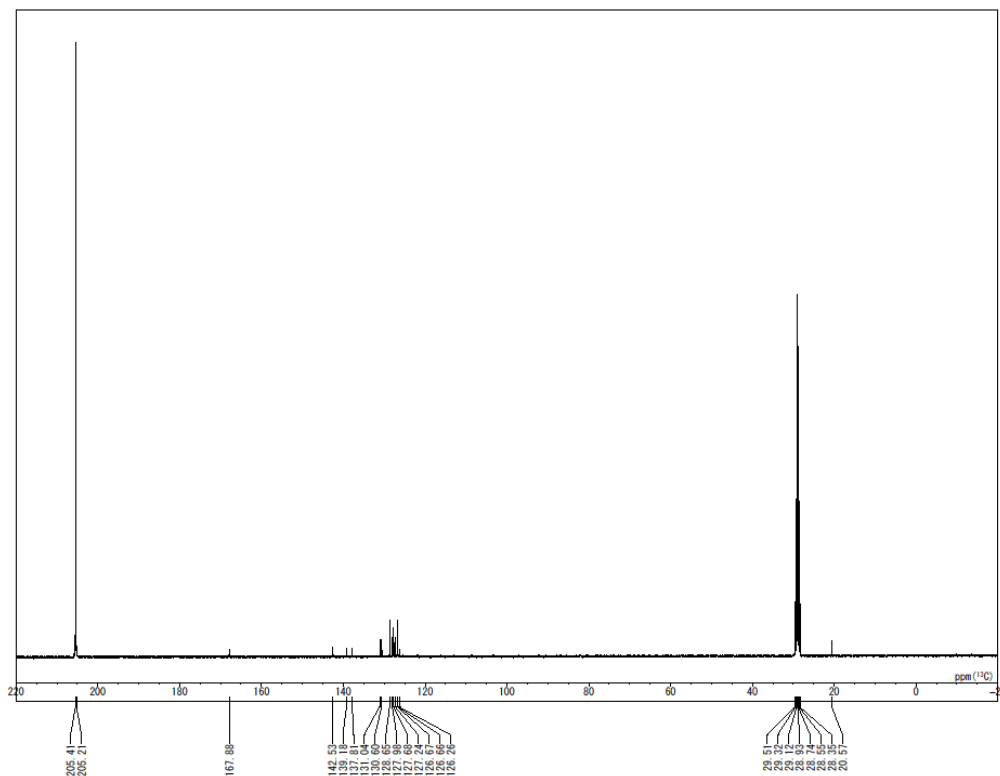

D:\FILE Y:\INDIVIDUALLY\實驗\実験関連\実験データ  
 ORGFILE Y:\INDIVIDUALLY\實驗\実験関連\実験データ  
 DATIM 15/Jun/2022 02:54:59  
 COMNT  
 ORNUC <sup>13</sup>C  
 OFR 100.61 MHz  
 ORSET 0.0 kHz  
 OFBIN 10060.2 Hz  
 PW1 10.0 μs  
 PW2 10.0 μs  
 PW3 20.0 μs  
 P11 2.0 ms  
 P12 0.0035 ms  
 P13 0.0 ms  
 LOOP1 0  
 POINT 131072 (ZeroFill: \*4)  
 SCANS 1024  
 DUMM 2  
 FREQ 29761.9 Hz  
 ACQIM 1.101 s  
 PD 2.0 s  
 RGAIN 205  
 BF 1.1 Hz  
 EXMOD ZPG30  
 TRNUC OFF  
 IFR 0.0 MHz  
 IRSET 0.0 kHz  
 IREFIN 0.0 Hz  
 IREFW 0 μs  
 IRATN 0  
 CSFD 20.0 Hz  
 CTEMP 20.61 °C  
 PRNT\_DATE 2022/Jun/15 11:31:11

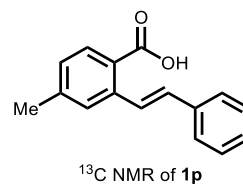



# Supporting Information II

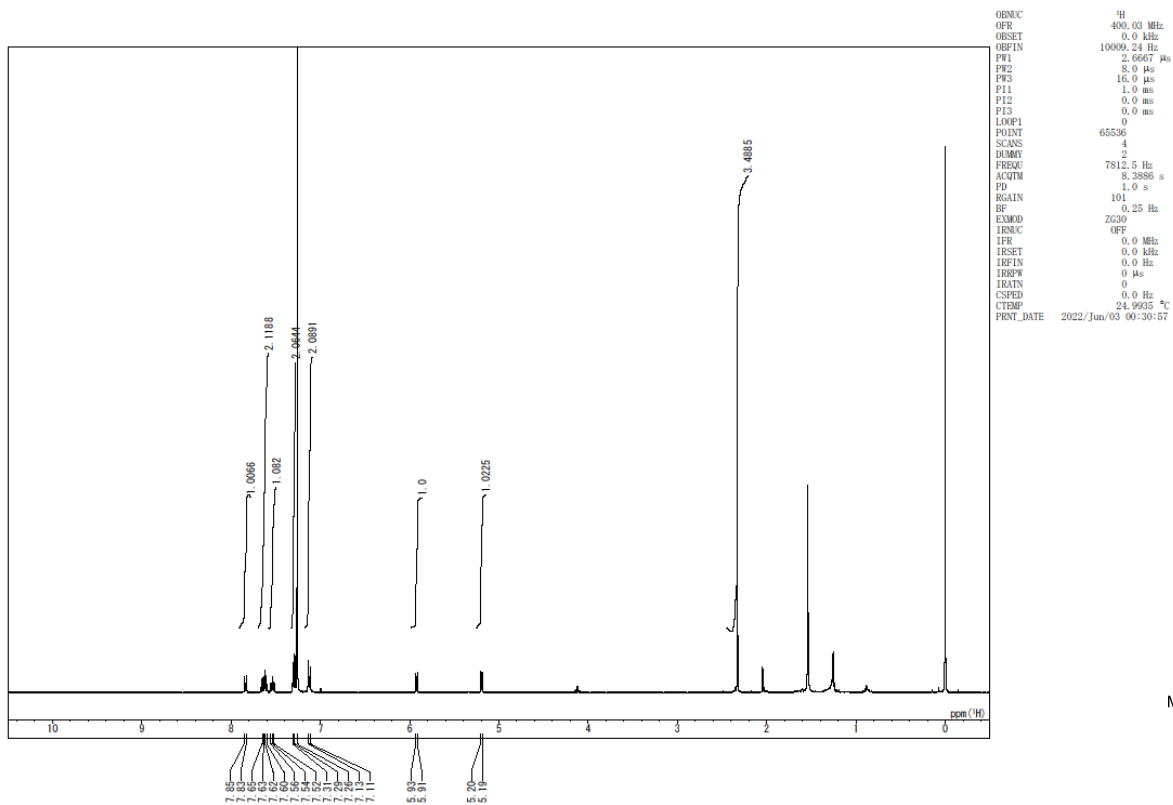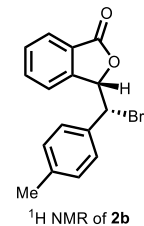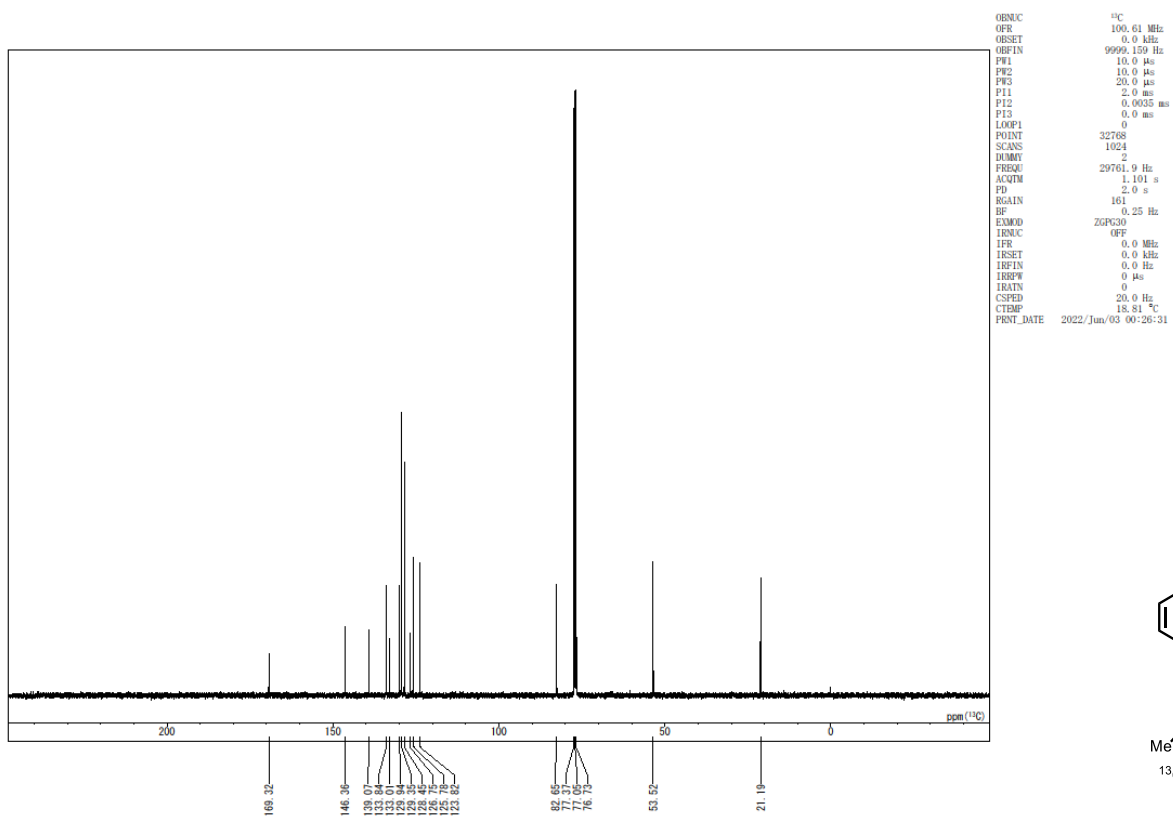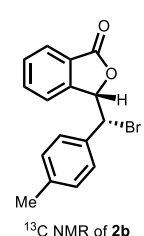

# Supporting Information II

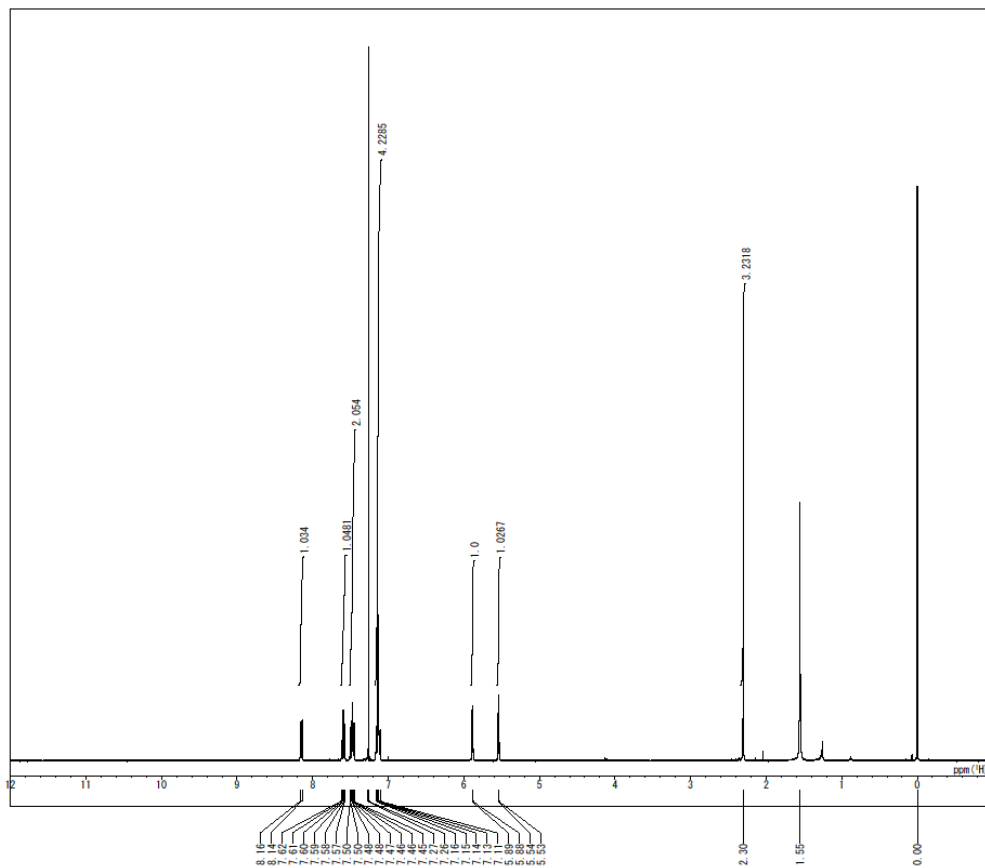

D:\FILE Y:\INDIVIDUALLY\實驗\實驗データ  
 ORGFILE Y:\INDIVIDUALLY\實驗\實驗データ  
 DATUM 21/Aug/2021 13:56:56  
 COMNT

ORNUC <sup>1</sup>H  
 OFR 400.13 MHz  
 ORSET 0.0 kHz  
 OFBIN 10021.89 Hz  
 PW1 15.0 μs  
 PW2 15.0 μs  
 PW3 30.0 μs  
 P11 1.0 ms  
 P12 0.0 ms  
 P13 0.0 ms  
 LOOP1 0  
 POINT 32768  
 SCANS 4  
 DDMF 2  
 DDMF1 8012.82 Hz  
 FREQ 4.0894 s  
 ACQTM 1.0 s  
 PD 203  
 RGAIN 0.25 Hz  
 BF 2630  
 EXMOD 0FF  
 IFR 0.0 MHz  
 IRSET 0.0 kHz  
 IREFIN 0.0 Hz  
 IREFW 0 μs  
 IRATN 0  
 CSFED 20.0 Hz  
 CTEMP 25.81 °C  
 PRNT\_DATE 2022/Mar/01 21:29:39

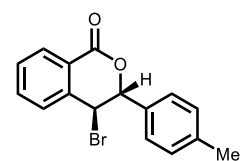



# Supporting Information II

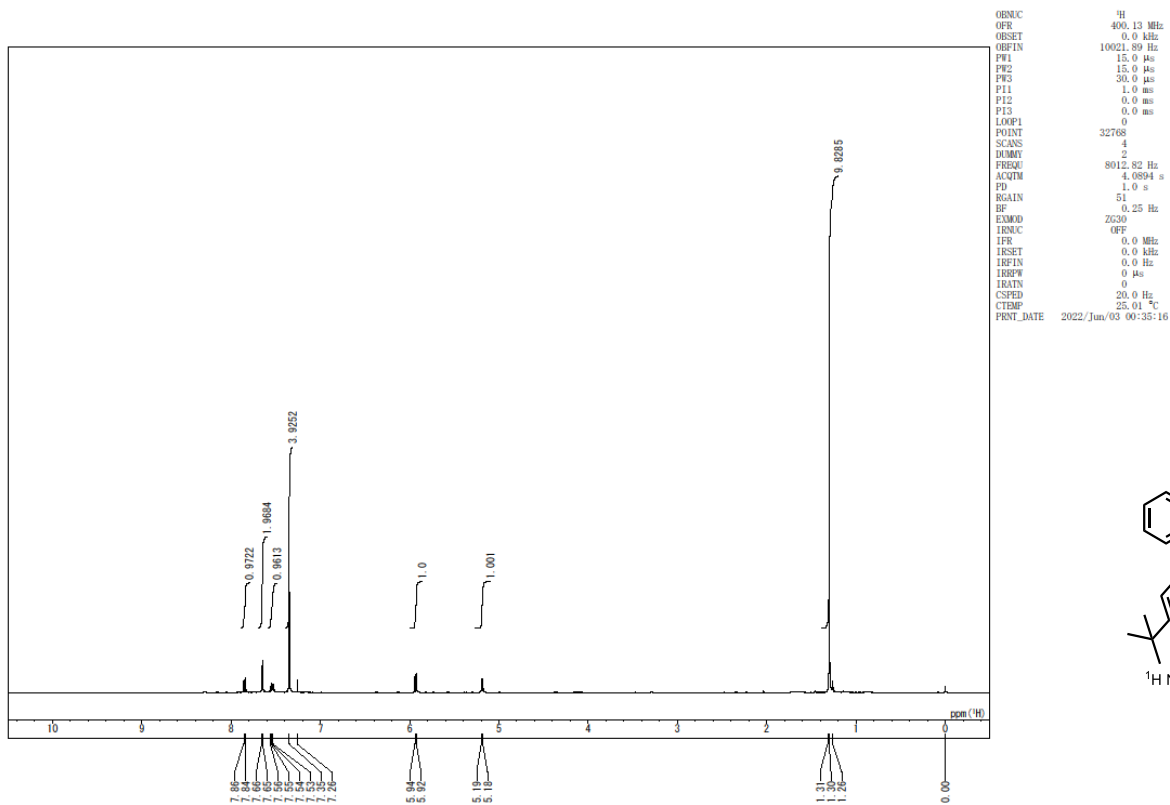

```

OBSUC      400.13 MHz
OFR        400.13 MHz
OBSET      0.0 kHz
OBFIN      10021.89 Hz
PWI        15.0 µs
PWC        15.0 µs
PFS        30.0 µs
P11        1.0 ms
P12        0.0 ms
P13        0.0 ms
LOOP1      0
POINT      32768
SCANS      4
DUMY       2
FREQ       8012.82 Hz
ACQTM      4.6994 s
PD         1.0 s
RGAIN      51
BF         0.25 Hz
EMOD       ZG30
IRNUC      OFF
IFR        0.0 MHz
IRSET      0.0 kHz
IRFIN      0.0 Hz
IRPWP      0 µs
IRATN      0
CSPED      20.0 Hz
CTEMP      25.01 °C
PRNT_DATE  2022/Jun/03 00:35:16
    
```

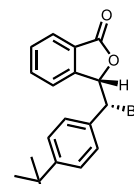

**<sup>1</sup>H NMR of 2c**

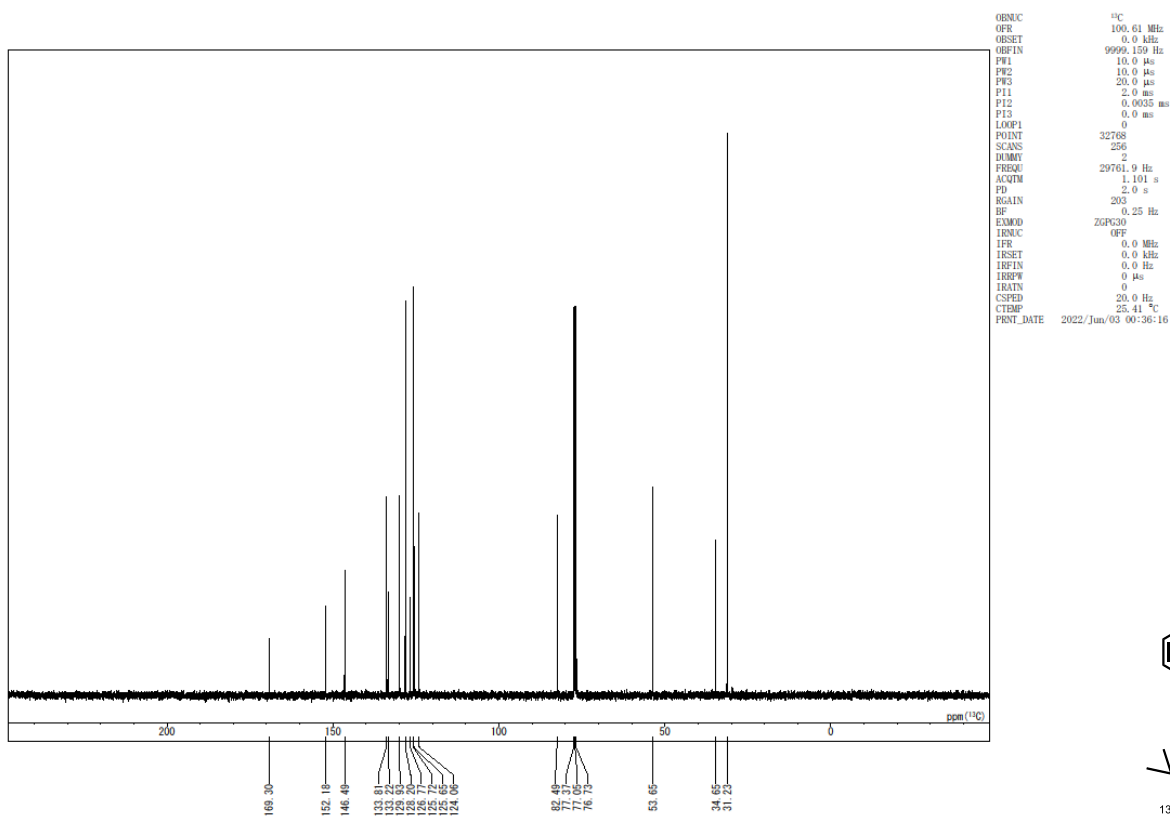

```

OBSUC      100.61 MHz
OFR        100.61 MHz
OBSET      0.0 kHz
OBFIN      9999.159 Hz
PWI        10.0 µs
PWC        10.0 µs
PFS        20.0 µs
P11        2.0 ms
P12        0.0035 ms
P13        0.0 ms
LOOP1      0
POINT      32768
SCANS      256
DUMY       2
FREQ       29761.9 Hz
ACQTM      1.101 s
PD         2.0 s
RGAIN      203
BF         0.25 Hz
EMOD       ZGPG30
IRNUC      OFF
IFR        0.0 MHz
IRSET      0.0 kHz
IRFIN      0.0 Hz
IRPWP      0 µs
IRATN      0
CSPED      20.0 Hz
CTEMP      25.41 °C
PRNT_DATE  2022/Jun/03 00:36:16
    
```

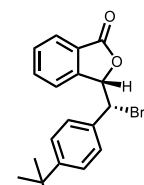

**<sup>13</sup>C NMR of 2c**

# Supporting Information II

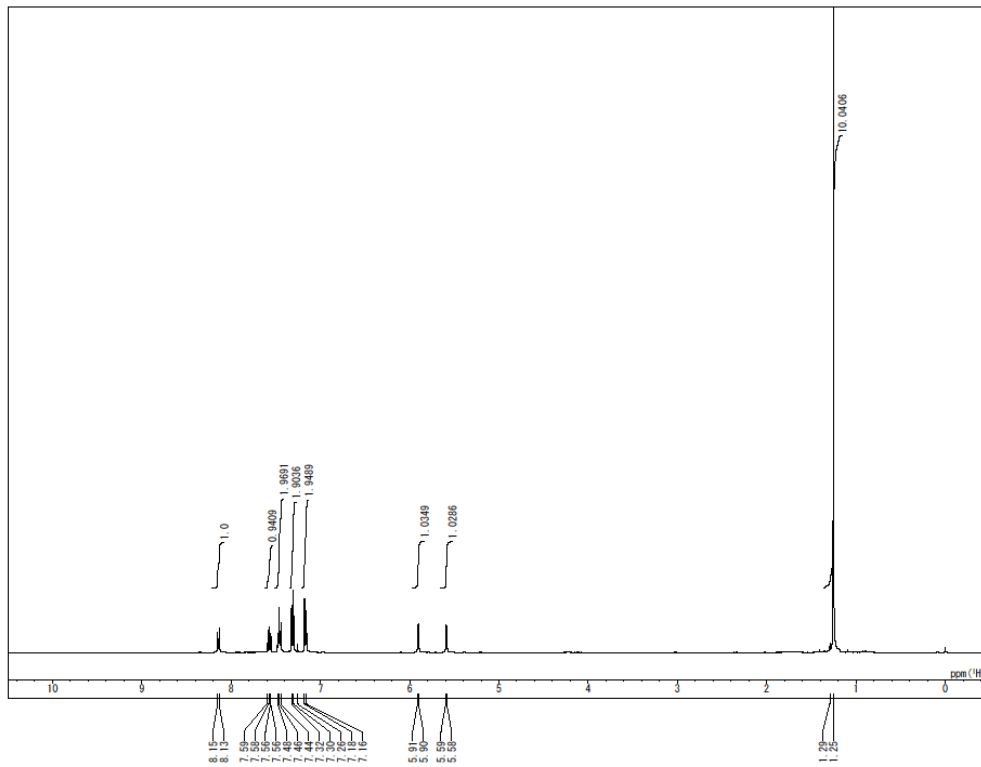

```

DFFILE Y:\INDIVIDUALLY\菅野Y実験関連\Y実験データ\
ORFFILE Y:\INDIVIDUALLY\菅野Y実験関連\Y実験デー
DATIM 11/Jan/2022 16:43:50
COMNT
ORNUC 1H
ORF 400.13 MHz
ORSET 0.0 kHz
ORFIN 10021.89 Hz
PW1 15.0  $\mu$ s
PW2 15.0  $\mu$ s
PW3 30.0  $\mu$ s
P11 1.0 ms
P12 0.0 ms
P13 0.0 ms
LOOP1 0
POINT 32768
SCANS 4
DUMMY 2
FREQ 8012.82 Hz
ACQTM 4.0894 s
PD 1.0 s
RGAIN 28
BF 0.1223 Hz
EMOD ZG30
IRNUC OFF
IFR 0.0 MHz
IRSET 0.0 kHz
IRFIN 0.0 Hz
IRPW 0  $\mu$ s
IRATN 0
CSPED 20.0 Hz
CTEMP 25.11  $^{\circ}$ C
PRNT_DATE 2022/Jan/21 21:49:07
    
```

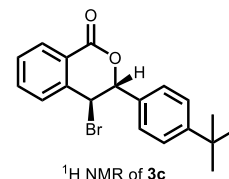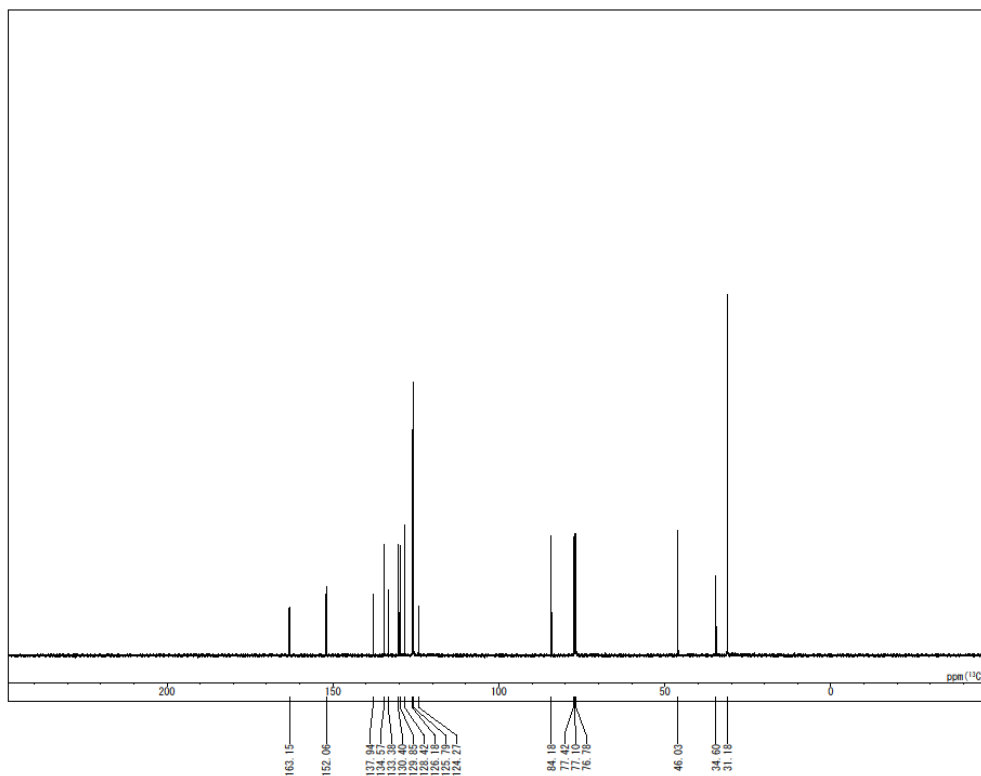

```

DFFILE Y:\INDIVIDUALLY\菅野Y実験関連\Y実験データ\
ORFFILE Y:\INDIVIDUALLY\菅野Y実験関連\Y実験デー
DATIM 11/Jan/2022 16:59:04
COMNT
ORNUC 13C
ORF 100.61 MHz
ORSET 0.0 kHz
ORFIN 9999.159 Hz
PW1 10.0  $\mu$ s
PW2 10.0  $\mu$ s
PW3 20.0  $\mu$ s
P11 2.0 ms
P12 0.0035 ms
P13 0.0 ms
LOOP1 0
POINT 32768
SCANS 256
DUMMY 2
FREQ 29761.9 Hz
ACQTM 1.101 s
PD 2.0 s
RGAIN 203
BF 0.25 Hz
EMOD ZGPG30
IRNUC OFF
IFR 0.0 MHz
IRSET 0.0 kHz
IRFIN 0.0 Hz
IRPW 0  $\mu$ s
IRATN 0
CSPED 20.0 Hz
CTEMP 25.91  $^{\circ}$ C
PRNT_DATE 2022/Jan/11 17:29:54
    
```

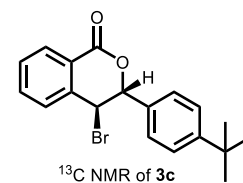

# Supporting Information II

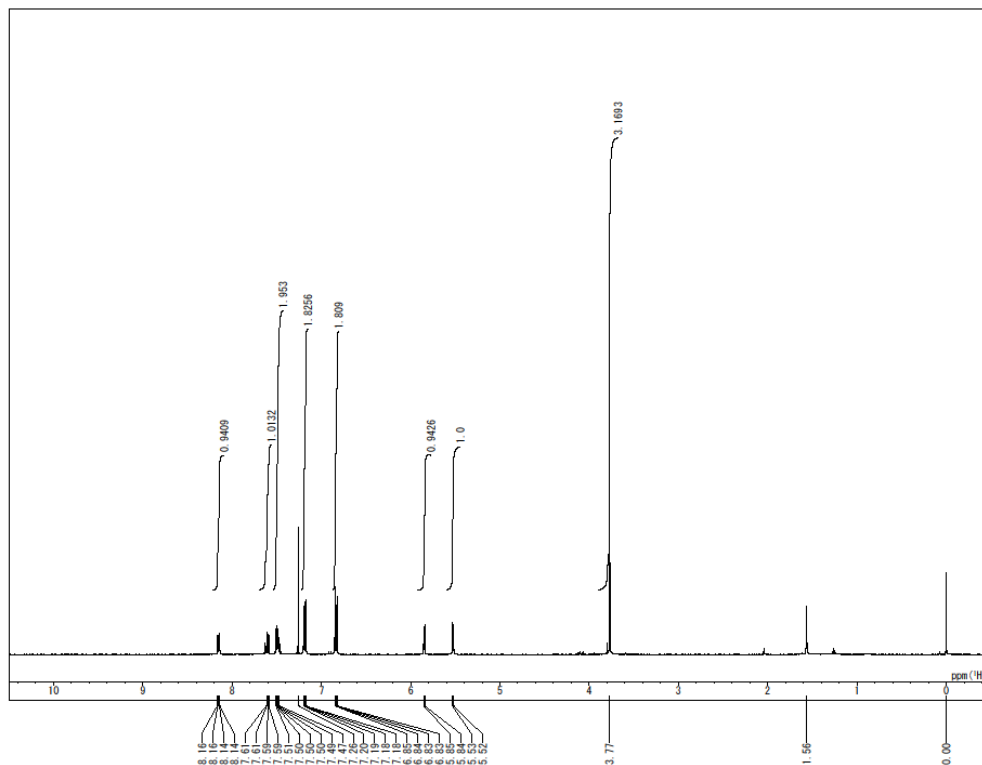

D:\FILE Y:\INDIVIDUALLY\實驗\測定\実験データ  
 ORGFILE Y:\INDIVIDUALLY\實驗\測定\実験データ  
 DATE 15/Jan/2022 14:22:17  
 COM1  
  
 ORNUC <sup>1</sup>H  
 OFR 400.13 MHz  
 ORSET 0.0 kHz  
 OFBIN 10021.89 Hz  
 PW 15.0 μs  
 PWC 15.0 μs  
 PWS 30.0 μs  
 P11 1.0 ms  
 P12 0.0 ms  
 P13 0.0 ms  
 LOOP1 0  
 POINT 32768  
 SCANS 4  
 DDMF 2  
 FREQ 8012.82 Hz  
 ACQTM 4.0894 s  
 PD 1.0 s  
 RGAIN 144  
 BF 0.25 Hz  
 EXMOD ZG30  
 PRNUC 0PF  
 IFR 0.0 MHz  
 IRSET 0.0 kHz  
 IREFIN 0.0 Hz  
 IREFW 0 μs  
 IRATN 0  
 CSFED 20.0 Hz  
 CTEMP 26.01 °C  
 PRINT DATE 2022/Jan/15 15:57:27

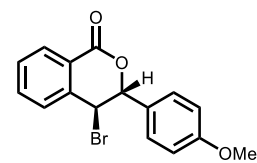

# Supporting Information II

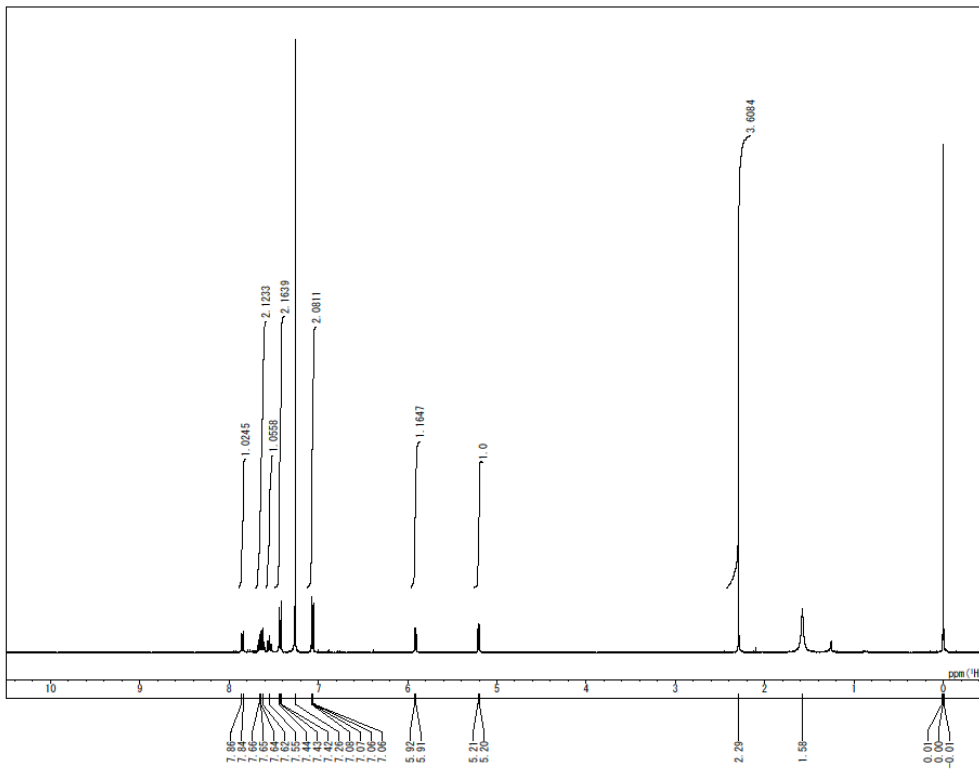

D:\FILE Y:\INDIVIDUALLY\實驗\實驗関連\実験データ  
 ORF\FILE Y:\INDIVIDUALLY\實驗\實驗関連\実験データ  
 DATIM 11/Jan/2022 23:15:28  
 COMNT  
 ORNUC <sup>1</sup>H  
 OFR 400.13 MHz  
 ORSET 0.0 kHz  
 OFPIN 10021.89 Hz  
 PW1 15.0 μs  
 PW2 15.0 μs  
 PW3 30.0 μs  
 P11 1.0 ms  
 P12 0.0 ms  
 P13 0.0 ms  
 LOOP1 0  
 POINT 32768  
 SCANS 4  
 DUMMY 2  
 FREQ 8012.82 Hz  
 ACQTM 4.0894 s  
 PD 1.0 s  
 RGAIN 181  
 BF 0.1223 Hz  
 EXMOD ZG30  
 INUC OFF  
 IFR 0.0 MHz  
 IRSET 0.0 kHz  
 IRFIN 0.0 Hz  
 IRRPW 0 μs  
 IRATN 0  
 CSPED 20.0 Hz  
 CTEMP 25.31 °C  
 PRNT\_DATE 2022/Jan/21 22:14:19

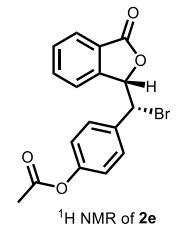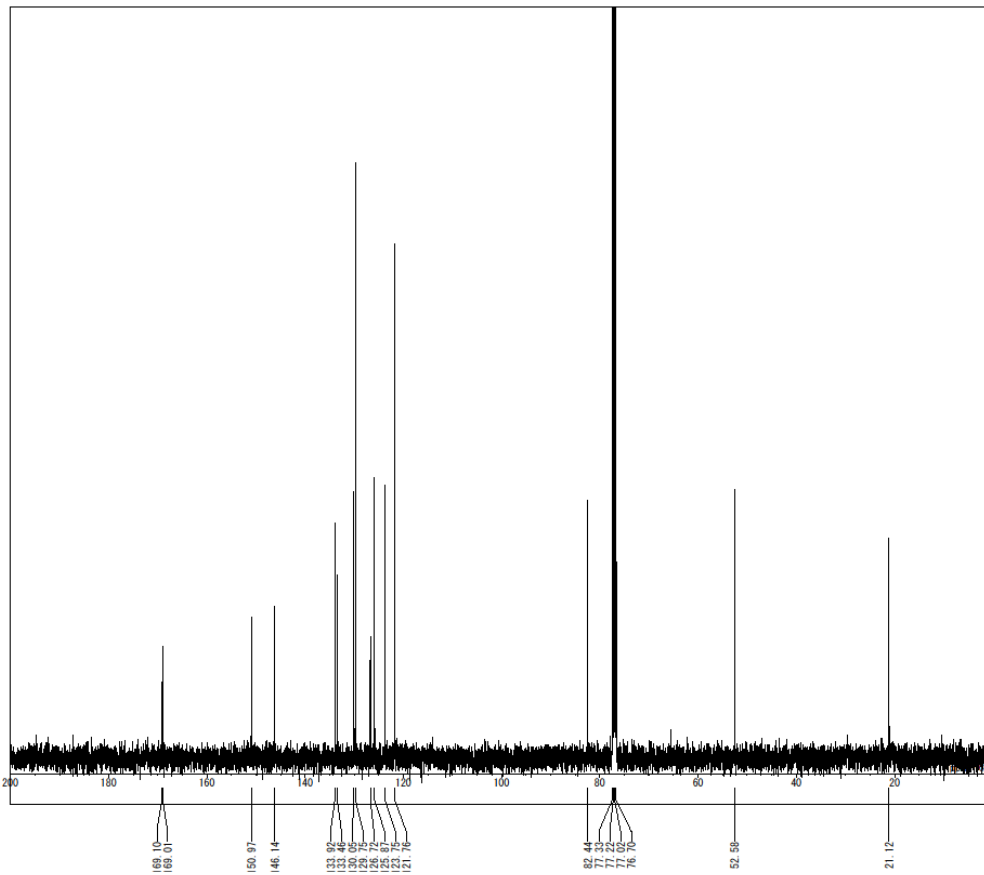

D:\FILE Y:\INDIVIDUALLY\實驗\實驗関連\実験データ  
 ORF\FILE Y:\INDIVIDUALLY\實驗\實驗関連\実験データ  
 DATIM 24/May/2022 03:55:22  
 COMNT  
 ORNUC <sup>13</sup>C  
 OFR 100.61 MHz  
 ORSET 0.0 kHz  
 OFPIN 9999.159 Hz  
 PW1 10.0 μs  
 PW2 10.0 μs  
 PW3 20.0 μs  
 P11 2.0 ms  
 P12 0.0035 ms  
 P13 0.0 ms  
 LOOP1 0  
 POINT 32768  
 SCANS 256  
 DUMMY 2  
 FREQ 29761.9 Hz  
 ACQTM 1.101 s  
 PD 2.0 s  
 RGAIN 203  
 BF 0.25 Hz  
 EXMOD ZGPG30  
 INUC OFF  
 IFR 0.0 MHz  
 IRSET 0.0 kHz  
 IRFIN 0.0 Hz  
 IRRPW 0 μs  
 IRATN 0  
 CSPED 20.0 Hz  
 CTEMP 25.51 °C  
 PRNT\_DATE 2022/Jan/02 09:18:52

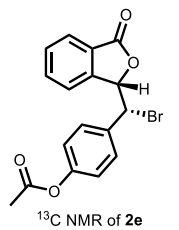

## Supporting Information II

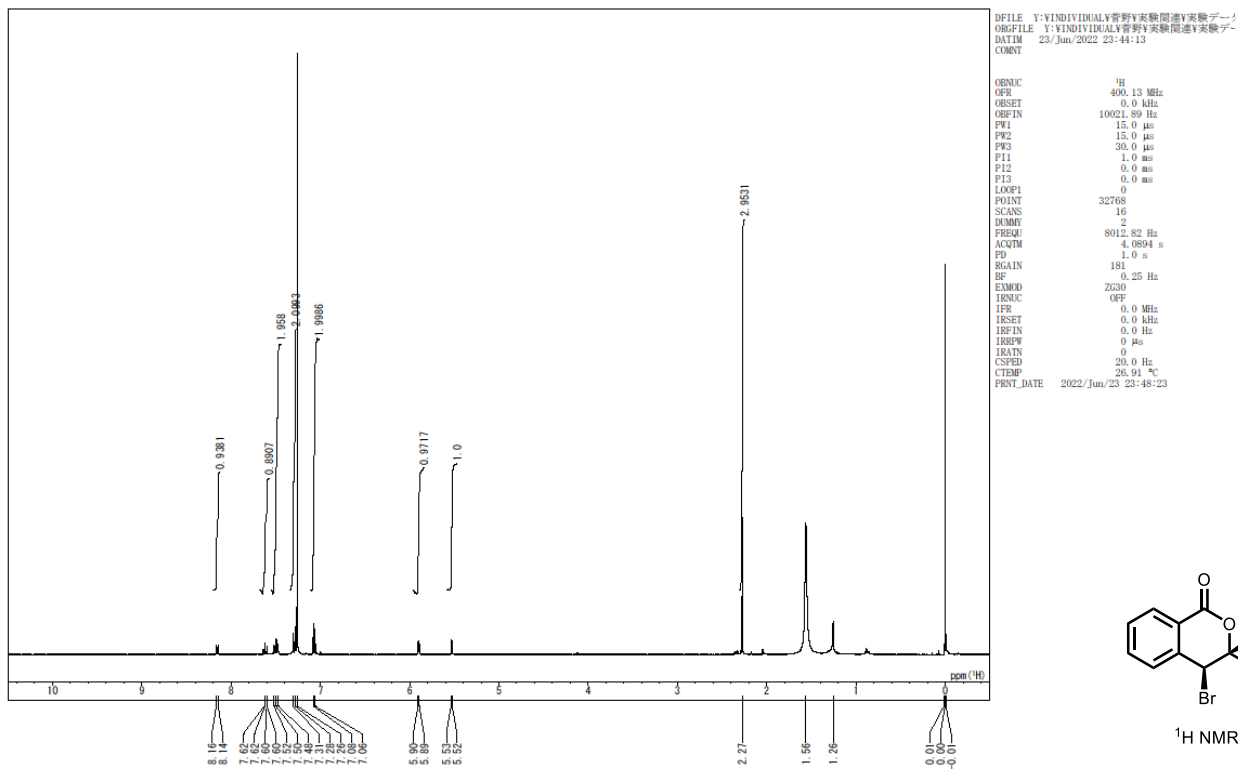

# Supporting Information II

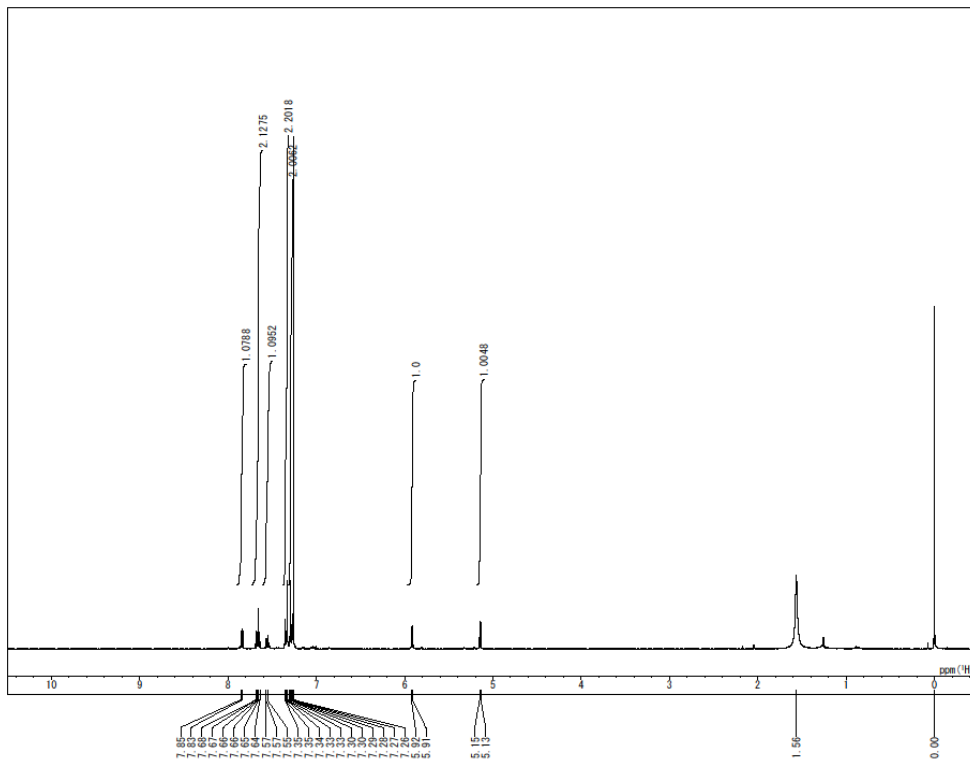

D:\FILE Y:\INDIVIDUALLY\習野Y実験関連Y実験デー  
 ORGFILE Y:\INDIVIDUALLY\習野Y実験関連Y実験デー  
 DATIM 23/Jan/2022 23:14:29  
 COMNT  
 ORNUC <sup>1</sup>H  
 OFR 400.13 MHz  
 OSETE 0.0 kHz  
 OFEIN 10021.59 Hz  
 PW1 15.0 μs  
 PW2 15.0 μs  
 PW3 30.0 μs  
 P11 1.0 ms  
 P12 0.0 ms  
 P13 0.0 ms  
 LOOP1 0  
 POINT 32768  
 SCANS 16  
 DUMM 2  
 FREQU 8012.82 Hz  
 ACQTM 4.8894 s  
 PD 1.0 s  
 RGAIN 161  
 BF 0.1223 Hz  
 EXMOD ZG30  
 IRNUC OFF  
 IFR 0.0 MHz  
 IRSET 0.0 kHz  
 IRFIN 0.0 Hz  
 IRBPW 0 μs  
 IRATN 0  
 CSPED 20.0 Hz  
 CTEMP 27.11 °C  
 PRNT\_DATE 2022/Jan/23 23:29:32

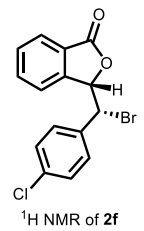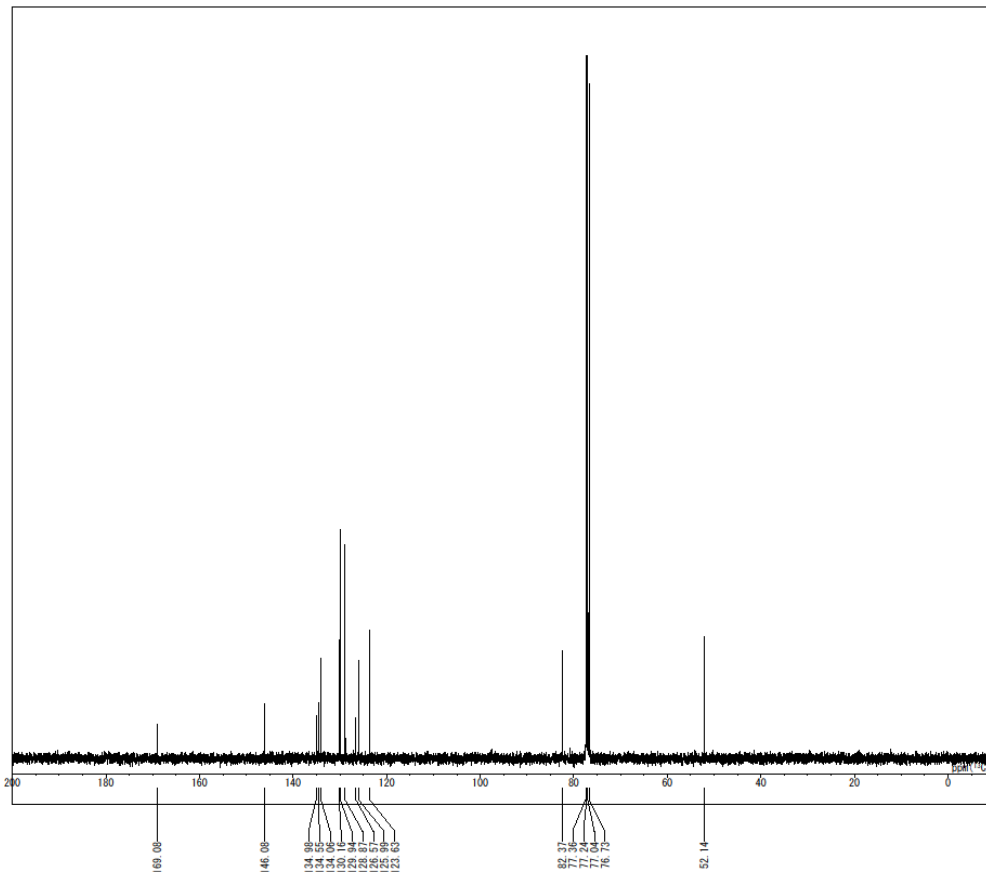

D:\FILE Y:\INDIVIDUALLY\習野Y実験関連Y実験デー  
 ORGFILE Y:\INDIVIDUALLY\習野Y実験関連Y実験デー  
 DATIM 20/Jan/2022 11:48:17  
 COMNT  
 ORNUC <sup>13</sup>C  
 OFR 100.61 MHz  
 OSETE 0.0 kHz  
 OFEIN 9999.159 Hz  
 PW1 10.0 μs  
 PW2 10.0 μs  
 PW3 20.0 μs  
 P11 2.0 ms  
 P12 0.0035 ms  
 P13 0.0 ms  
 LOOP1 0  
 POINT 32768  
 SCANS 256  
 DUMM 2  
 FREQU 29761.9 Hz  
 ACQTM 1.101 s  
 PD 2.0 s  
 RGAIN 161  
 BF 0.25 Hz  
 EXMOD ZGPG30  
 IRNUC OFF  
 IFR 0.0 MHz  
 IRSET 0.0 kHz  
 IRFIN 0.0 Hz  
 IRBPW 0 μs  
 IRATN 0  
 CSPED 20.0 Hz  
 CTEMP 18.61 °C  
 PRNT\_DATE 2022/Mar/01 21:37:34

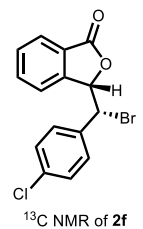

# Supporting Information II

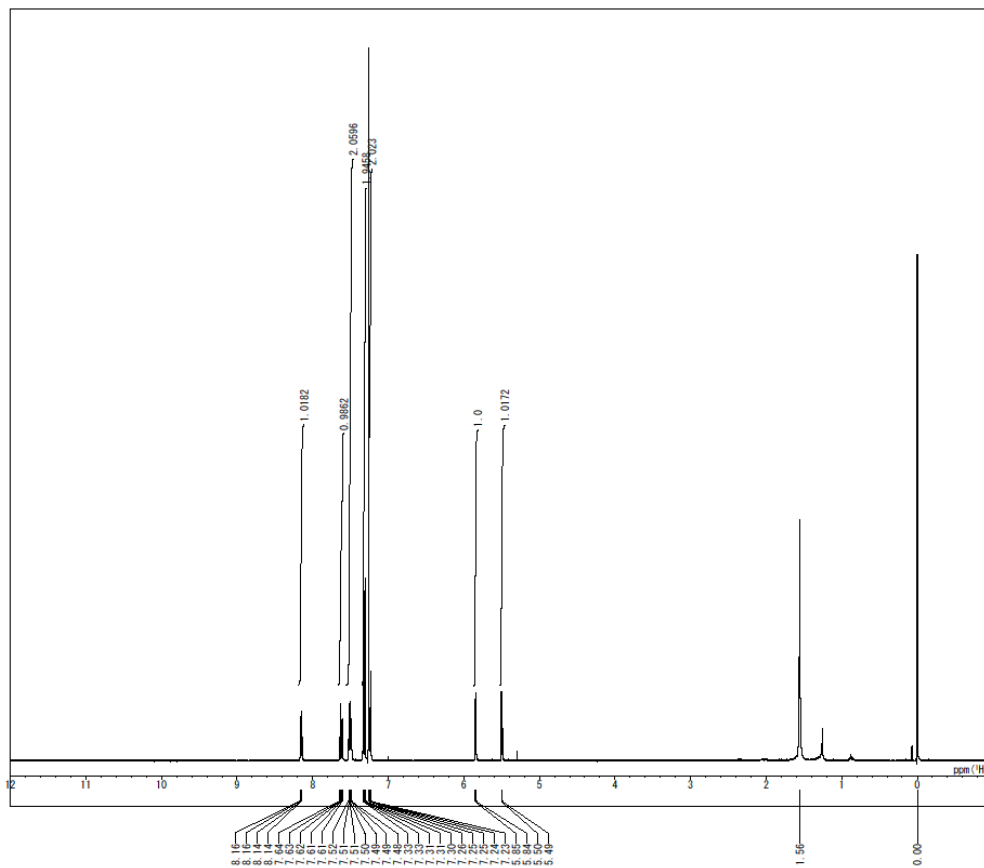

D:\FILE Y:\INDIVIDUALLY\實驗\實驗データ\COMT  
 ORGFILE Y:\INDIVIDUALLY\實驗\實驗データ\COMT  
 DATIM 24/Aug/2021 14:57:44  
 COMT  
 ORNUC <sup>1</sup>H  
 OFR 400.13 MHz  
 ORSET 0.0 kHz  
 OFBIN 10021.89 Hz  
 PW1 15.0 μs  
 PW2 15.0 μs  
 PW3 30.0 μs  
 P11 1.0 ms  
 P12 0.0 ms  
 P13 0.0 ms  
 LOOP1 0  
 POINT 32768  
 SCANS 4  
 DDMF 2  
 FREQ 8012.82 Hz  
 ACQM 4.0894 s  
 PD 1.0 s  
 RGAIN 203  
 BF 0.25 Hz  
 EXMOD 2630  
 INUC OFF  
 IFR 0.0 MHz  
 IRSET 0.0 kHz  
 IREFIN 0.0 Hz  
 IRRPW 0 μs  
 IRATN 0  
 CSFED 20.0 Hz  
 CTEMP 26.41 °C  
 PRNT\_DATE 2022/Mar/01 21:35:32

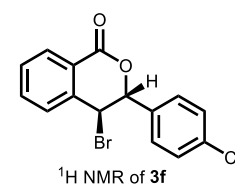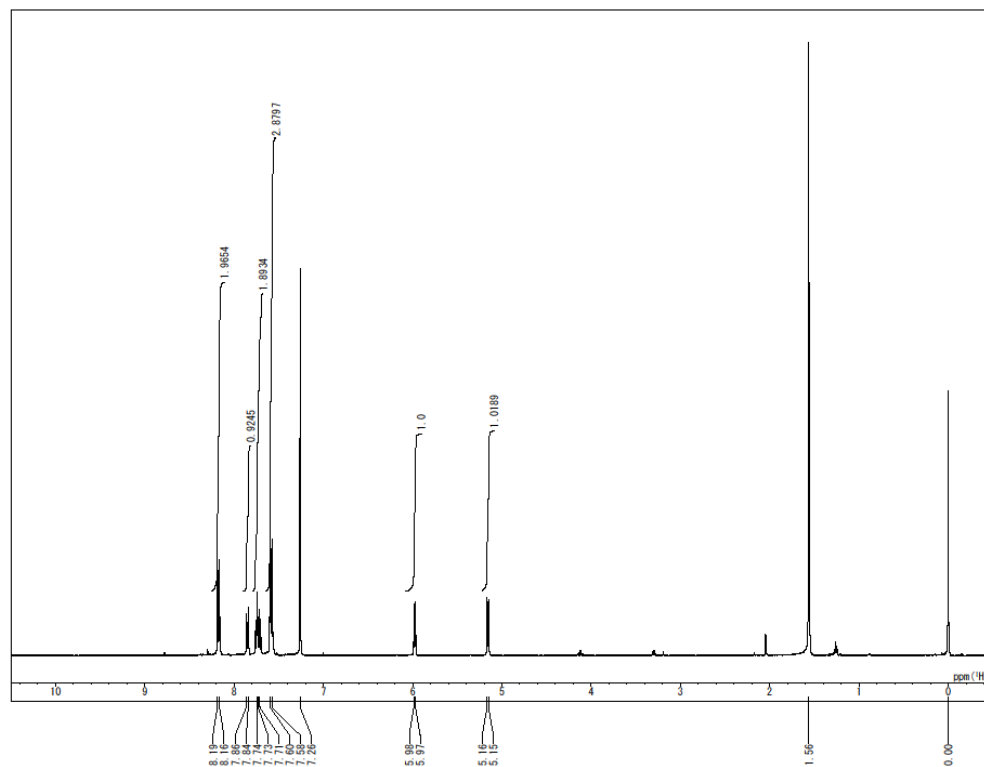

D:\FILE X:\062086\ORG\MSS194B\10\PDAT\1\11  
 ORGFILE X:\062086\ORG\MSS194B\10\PDAT\1\11  
 DATIM 20/Jun/2022 23:21:18  
 COMT  
 ORNUC <sup>1</sup>H  
 OFR 400.03 MHz  
 ORSET 0.0 kHz  
 OFBIN 10000.24 Hz  
 PW1 2.6667 μs  
 PW2 8.0 μs  
 PW3 16.0 μs  
 P11 1.0 ms  
 P12 0.0 ms  
 P13 0.0 ms  
 LOOP1 0  
 POINT 65536  
 SCANS 4  
 DDMF 2  
 FREQ 7812.5 Hz  
 ACQM 8.3886 s  
 PD 1.0 s  
 RGAIN 101  
 BF 0.25 Hz  
 EXMOD 2630  
 INUC OFF  
 IFR 0.0 MHz  
 IRSET 0.0 kHz  
 IREFIN 0.0 Hz  
 IRRPW 0 μs  
 IRATN 0  
 CSFED 0.0 Hz  
 CTEMP 24.9977 °C  
 PRNT\_DATE 2022/Jun/20 23:26:30

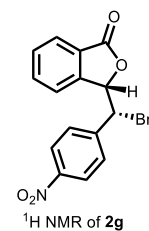

# Supporting Information II

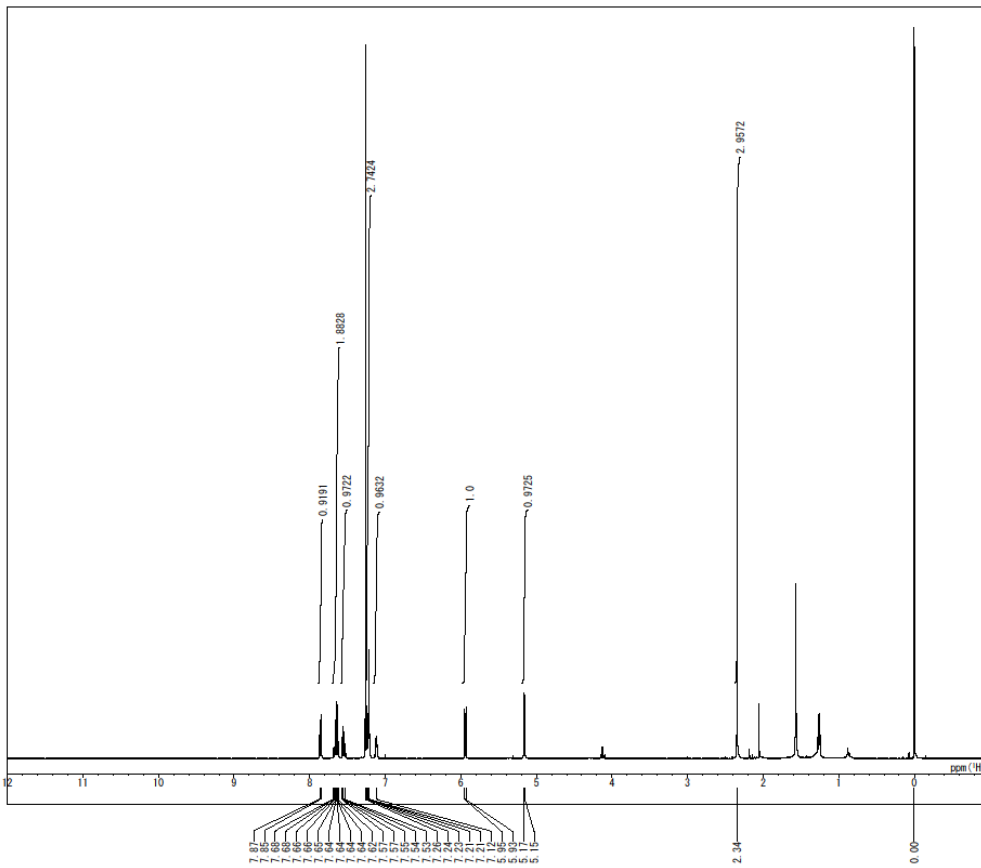

D:\FILE Y:\INDIVIDUALLY\實驗\測定\Y実験データ  
 ORGFILE Y:\INDIVIDUALLY\實驗\測定\Y実験データ  
 DATIM 19/Jan/2022 02:17:46  
 COMNT  
 OBNUC <sup>1</sup>H  
 OFR 400.13 MHz  
 OSSET 0.0 kHz  
 OFBIN 10021.89 Hz  
 PW1 15.0 μs  
 PW2 15.0 μs  
 PW3 30.0 μs  
 P11 1.0 ms  
 P12 0.0 ms  
 P13 0.0 ms  
 LOOP1 0  
 POINT 32768  
 SCANS 16  
 DOMM 2  
 FREQU 8012.82 Hz  
 ACQTM 4.0894 s  
 PD 1.0 s  
 RGAIN 203  
 BF 0.25 Hz  
 EXMOD 2630  
 TRUC OFF  
 IFR 0.0 MHz  
 IRSET 0.0 kHz  
 IREFIN 0.0 Hz  
 IRRPW 0 μs  
 IRATN 0  
 CSFED 20.0 Hz  
 CTEMP 18.01 °C  
 PRNT\_DATE 2022/Mar/01 21:45:54

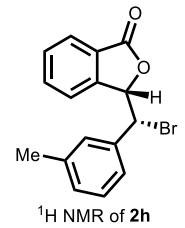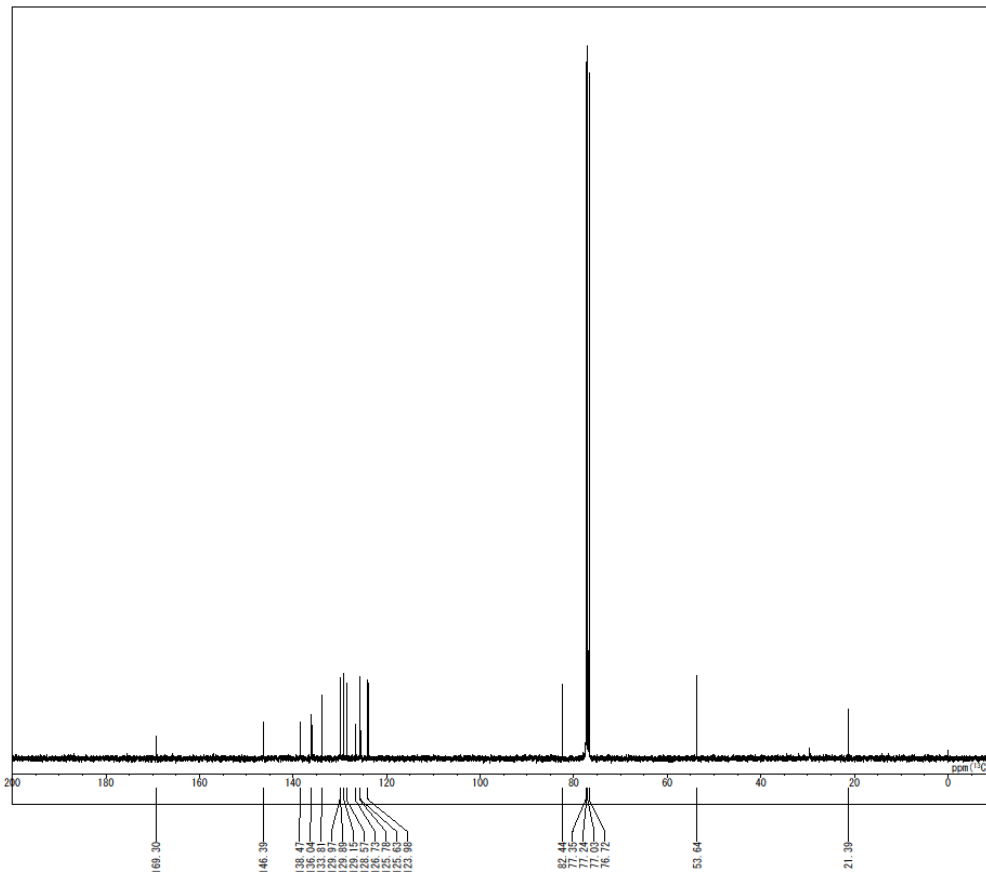

D:\FILE Y:\INDIVIDUALLY\實驗\測定\Y実験データ  
 ORGFILE Y:\INDIVIDUALLY\實驗\測定\Y実験データ  
 DATIM 19/Jan/2022 03:24:56  
 COMNT  
 OBNUC <sup>13</sup>C  
 OFR 100.61 MHz  
 OSSET 0.0 kHz  
 OFBIN 9999.159 Hz  
 PW1 10.0 μs  
 PW2 10.0 μs  
 PW3 20.0 μs  
 P11 2.0 ms  
 P12 0.0035 ms  
 P13 0.0 ms  
 LOOP1 0  
 POINT 32768  
 SCANS 1024  
 DOMM 2  
 FREQU 29761.9 Hz  
 ACQTM 1.101 s  
 PD 2.0 s  
 RGAIN 144  
 BF 0.25 Hz  
 EXMOD 2630  
 TRUC OFF  
 IFR 0.0 MHz  
 IRSET 0.0 kHz  
 IREFIN 0.0 Hz  
 IRRPW 0 μs  
 IRATN 0  
 CSFED 20.0 Hz  
 CTEMP 18.91 °C  
 PRNT\_DATE 2022/Mar/01 21:47:07

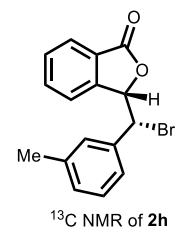



# Supporting Information II

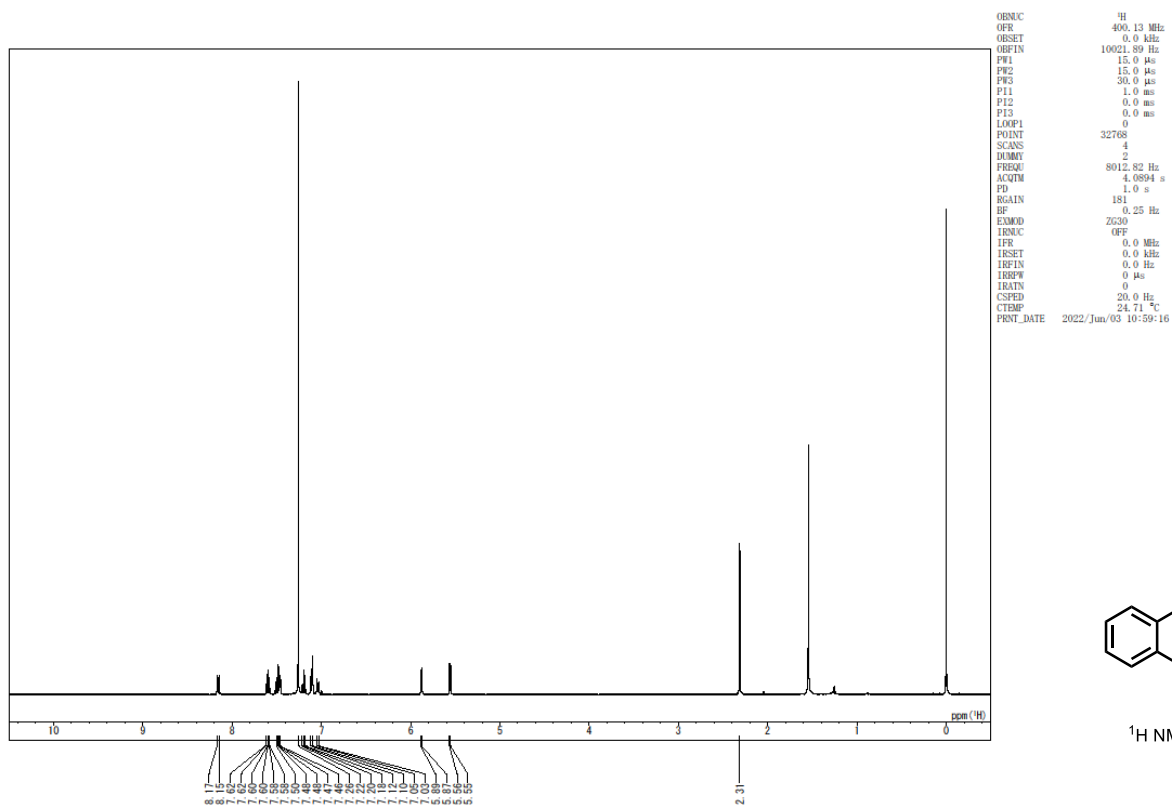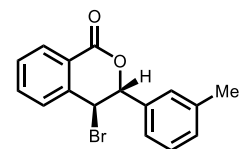

<sup>1</sup>H NMR of **3h**

# Supporting Information II

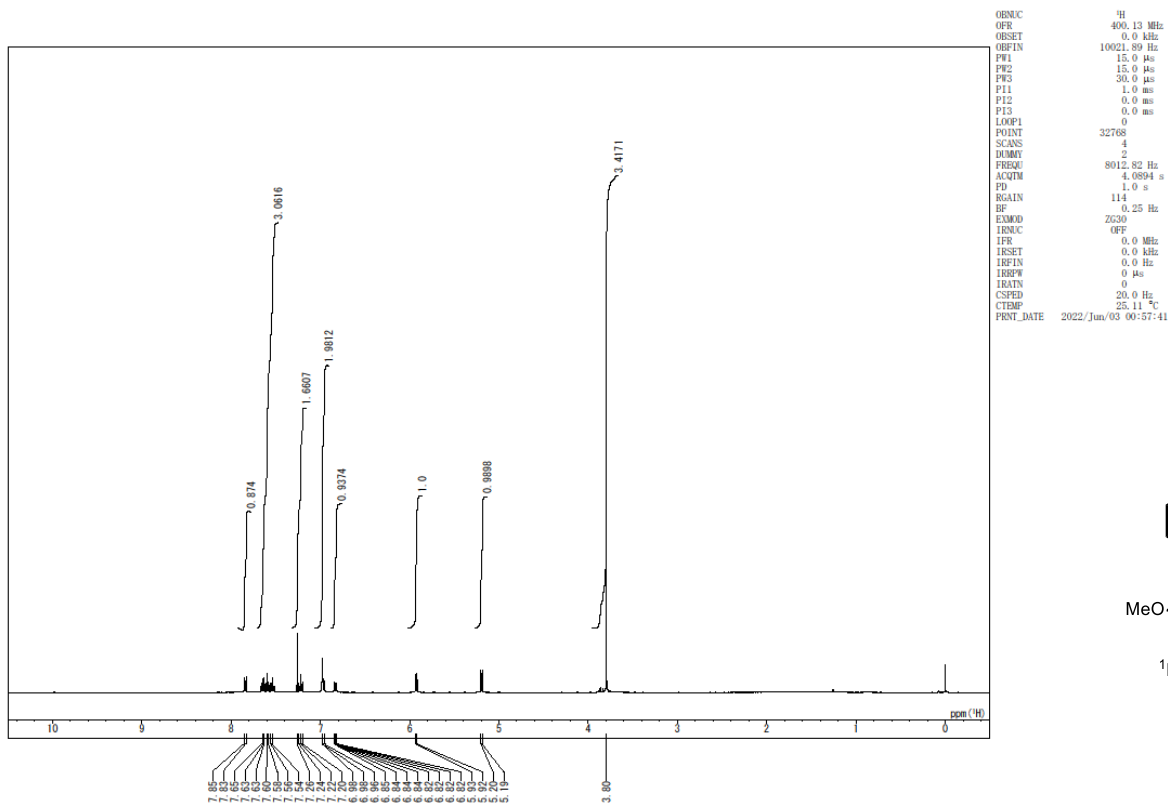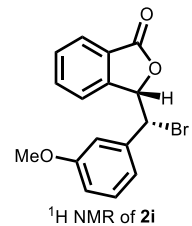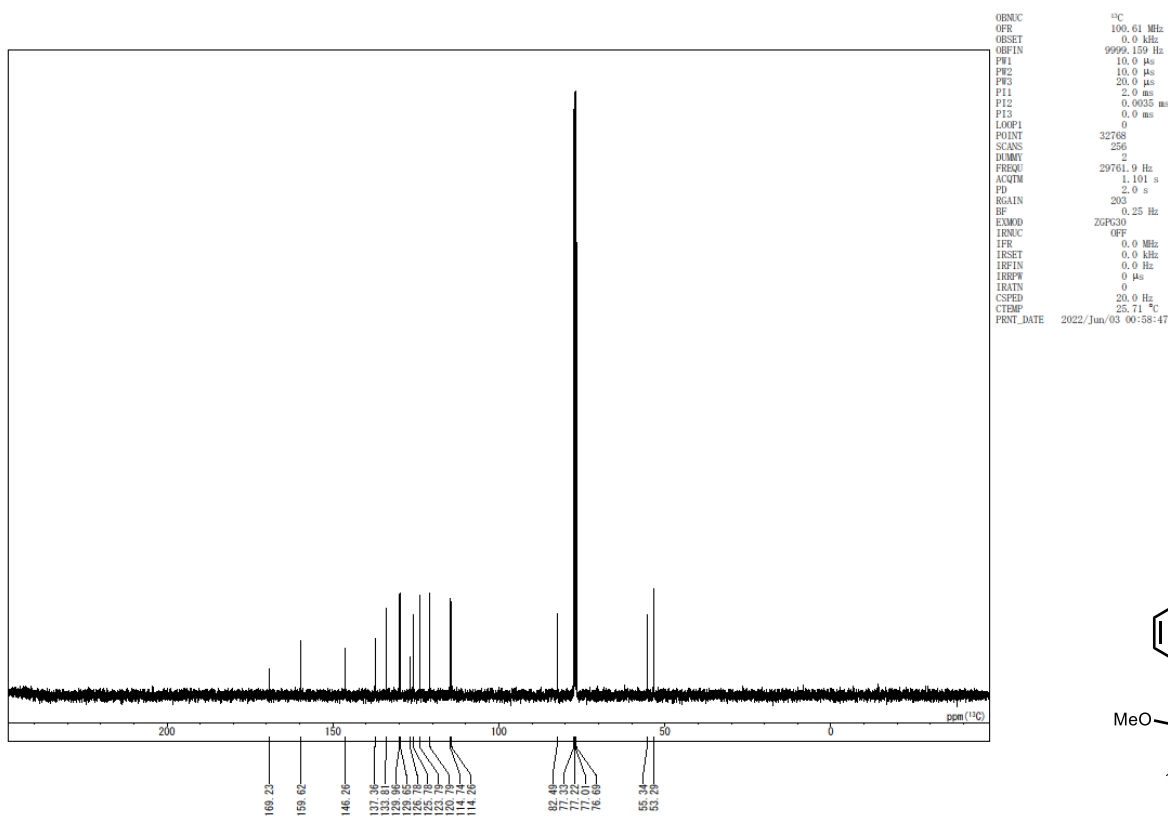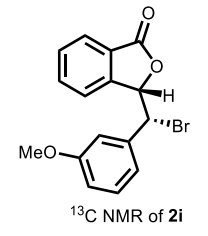

# Supporting Information II

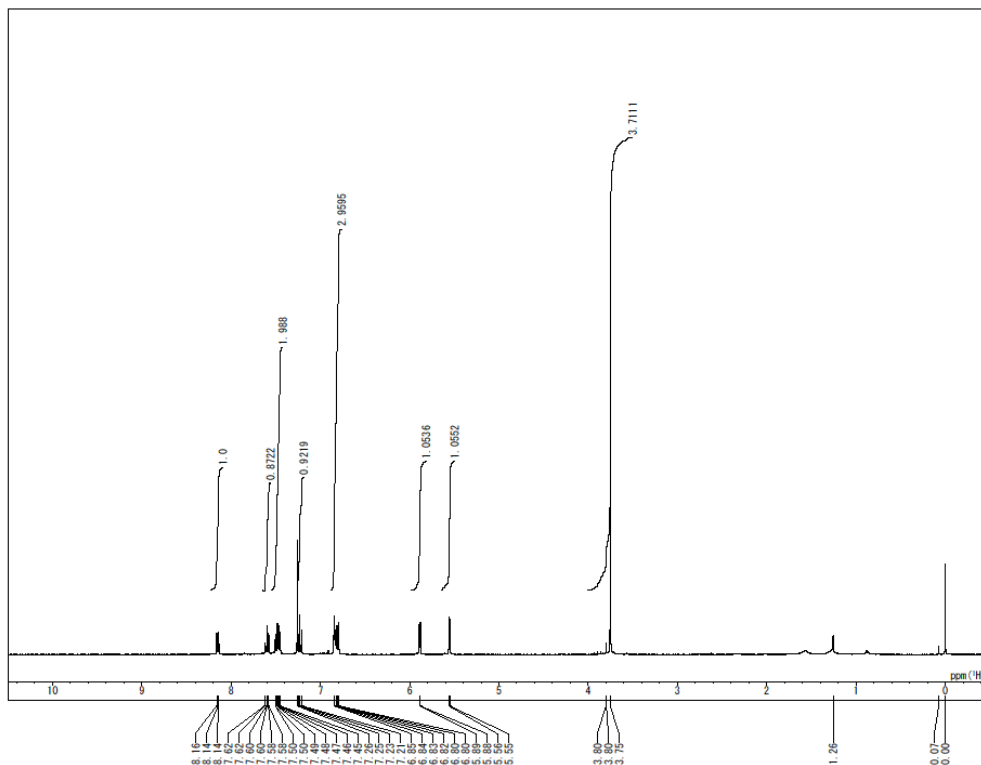

D:\FILE Y:\INDIVIDUALLY\菅野Y実験関連\Y実験データ  
 ORGFILE Y:\INDIVIDUALLY\菅野Y実験関連\Y実験デー  
 DATIM 11/Jan/2022 17:51:44  
 COMNT  
 ORNUC <sup>1</sup>H  
 OFR 400.13 MHz  
 ORSET 0.0 kHz  
 OFBIN 10021.89 Hz  
 PW1 15.0 μs  
 PW2 15.0 μs  
 PW3 30.0 μs  
 P11 1.0 ms  
 P12 0.0 ms  
 P13 0.0 ms  
 LOOP1 0  
 POINT 32768  
 SCANS 4  
 DOMM 2  
 FREQ 8012.92 Hz  
 ACQTM 4.0894 s  
 PD 1.0 s  
 RGAIN 128  
 BF 0.25 Hz  
 EXMOD 2630  
 TRUC OFF  
 IFR 0.0 MHz  
 IRSET 0.0 kHz  
 IREFIN 0.0 Hz  
 IRRPW 0 μs  
 IRATN 0  
 CSFD 20.0 Hz  
 CTEMP 25.21 °C  
 PRNT\_DATE 2022/Jan/11 18:31:38

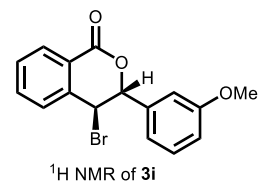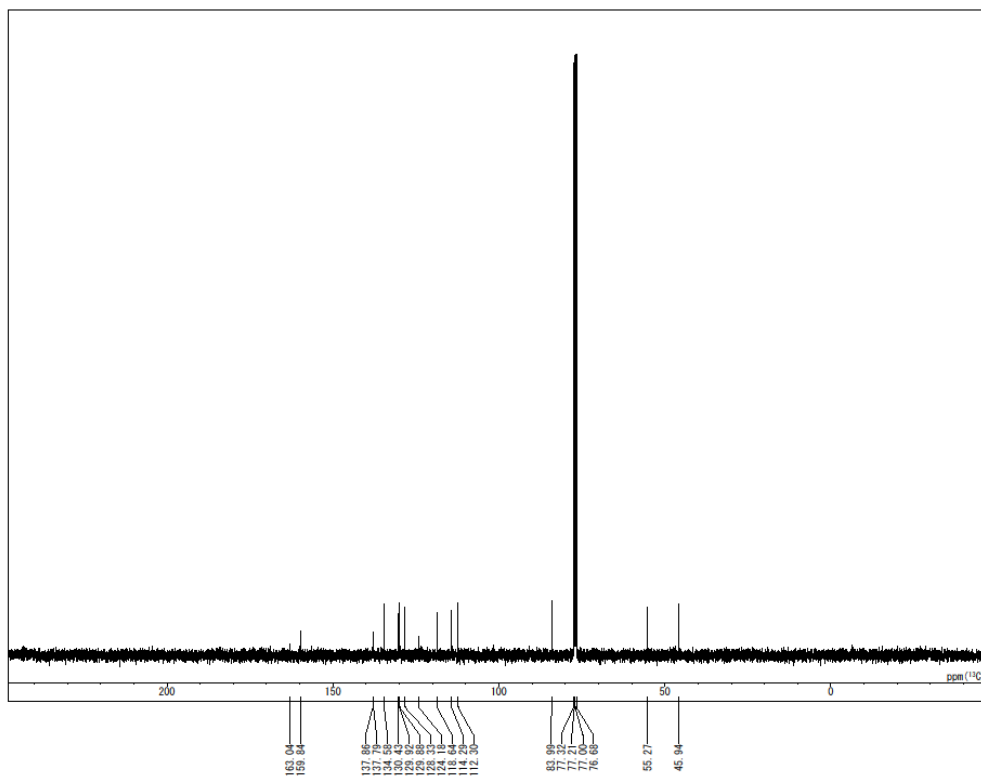

D:\FILE Y:\INDIVIDUALLY\菅野Y実験関連\Y実験デー  
 ORGFILE Y:\INDIVIDUALLY\菅野Y実験関連\Y実験デー  
 DATIM 11/Jan/2022 18:06:56  
 COMNT  
 ORNUC <sup>13</sup>C  
 OFR 100.61 MHz  
 ORSET 0.0 kHz  
 OFBIN 9999.159 Hz  
 PW1 10.0 μs  
 PW2 10.0 μs  
 PW3 20.0 μs  
 P11 2.0 ms  
 P12 0.0035 ms  
 P13 0.0 ms  
 LOOP1 0  
 POINT 32768  
 SCANS 256  
 DOMM 2  
 FREQ 29761.9 Hz  
 ACQTM 1.101 s  
 PD 2.0 s  
 RGAIN 203  
 BF 0.25 Hz  
 EXMOD 2630  
 TRUC OFF  
 IFR 0.0 MHz  
 IRSET 0.0 kHz  
 IREFIN 0.0 Hz  
 IRRPW 0 μs  
 IRATN 0  
 CSFD 20.0 Hz  
 CTEMP 26.01 °C  
 PRNT\_DATE 2022/Jan/11 18:45:51

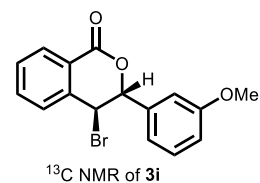

# Supporting Information II

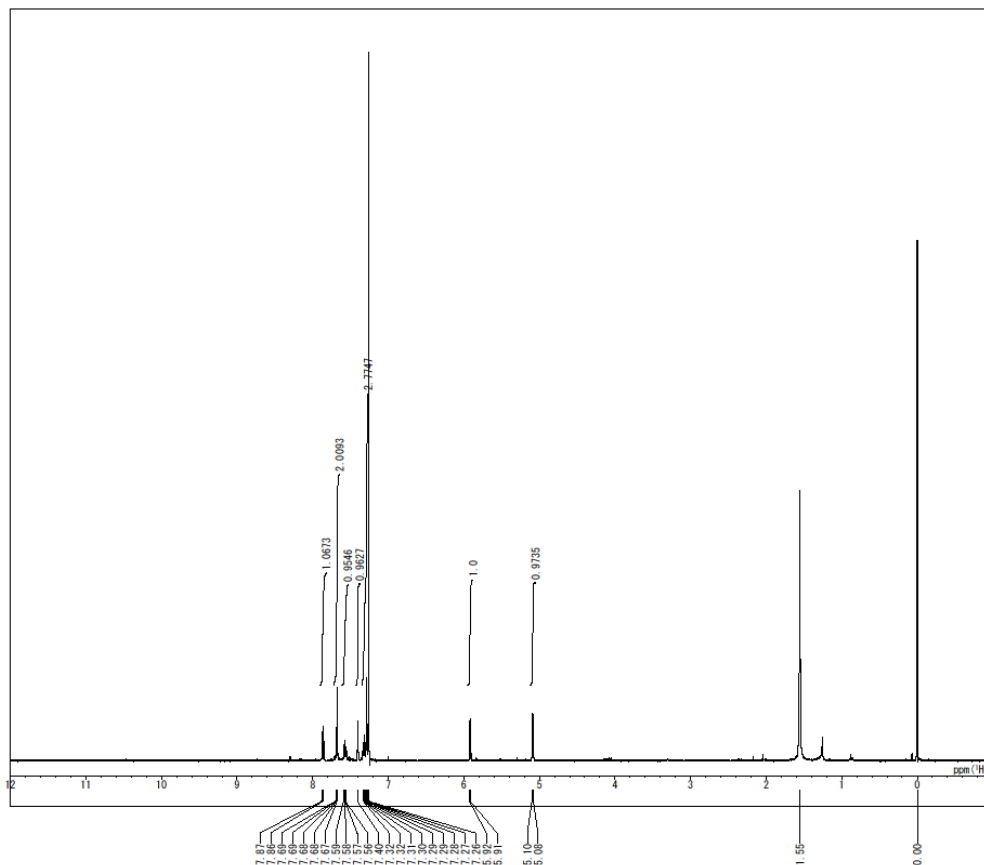

D:\FILE Y:\INDIVIDUALLY\菅野\実験関連\Y実験データ  
 ORF\FILE Y:\INDIVIDUALLY\菅野\実験関連\Y実験データ  
 DATUM 15/Jul/2021 13:09:47  
 COMNT  
  
 ORNUC <sup>1</sup>H  
 ORF 400.13 MHz  
 ORSET 0.0 kHz  
 ORFIN 10021.89 Hz  
 PWR 15.0  $\mu$ s  
 PWC 15.0  $\mu$ s  
 PWS 30.0  $\mu$ s  
 PTL 1.0 ms  
 PTC 0.0 ms  
 P13 0.0 ms  
 LOOP1 0  
 POINT 32768  
 SCANS 4  
 DDMT 2  
 PRESU 8012.82 Hz  
 ACQTM 4.0894 s  
 PD 1.0 s  
 RGAIN 200  
 BF 0.25 Hz  
 EXMOD ZG30  
 TRUC OFF  
 IFR 0.0 MHz  
 IRSET 0.0 kHz  
 IREFIN 0.0 Hz  
 IREFW 0  $\mu$ s  
 IRATN 0  
 CSFED 28.0 Hz  
 CTEMP 26.31  $^{\circ}$ C  
 PRNT\_DATE 2022/Mar/01 21:41:39

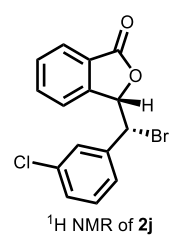

## Supporting Information II

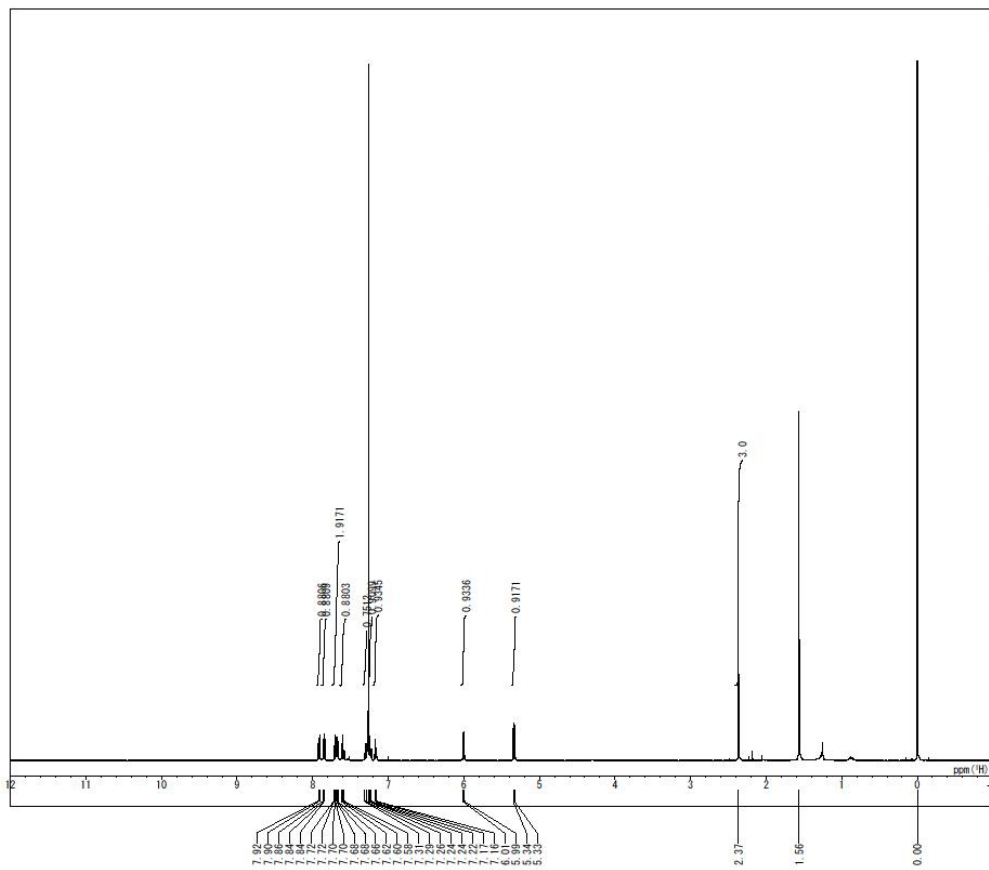

```
DFILE Y:\INDIVIDUALLY精製Y実験関連Y実験データ\
ORFILE Y:\INDIVIDUALLY精製Y実験関連Y実験データ\
DATIM 19/Jan/2022 00:11:44
COMNT
ORNUC 1H
OF1 400.13 MHz
OSSET 0.0 kHz
OFIN 10021.89 Hz
PW1 15.0 us
PW2 15.0 us
PW3 30.0 us
PI1 1.0 ms
PI2 0.0 ms
PI3 0.0 ms
LOOP1 0
POINT 32768
SCANS 16
DOMM 2
FREQ 8012.82 Hz
ACQM 4.0894 s
FD 1.0 s
RGAIN 203
BF 0.25 Hz
EMOD 2630
FNUC OFF
IFR 0.0 MHz
IRSET 0.0 kHz
IRFIN 0.0 Hz
IRBPW 0 us
IRATN 0
CSPED 20.0 Hz
CTEMP 17.81 °C
PRNT_DATE 2022/Mar/01 21:57:37
```

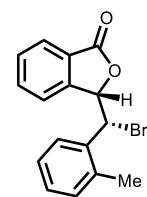

**<sup>1</sup>H NMR of 2k**

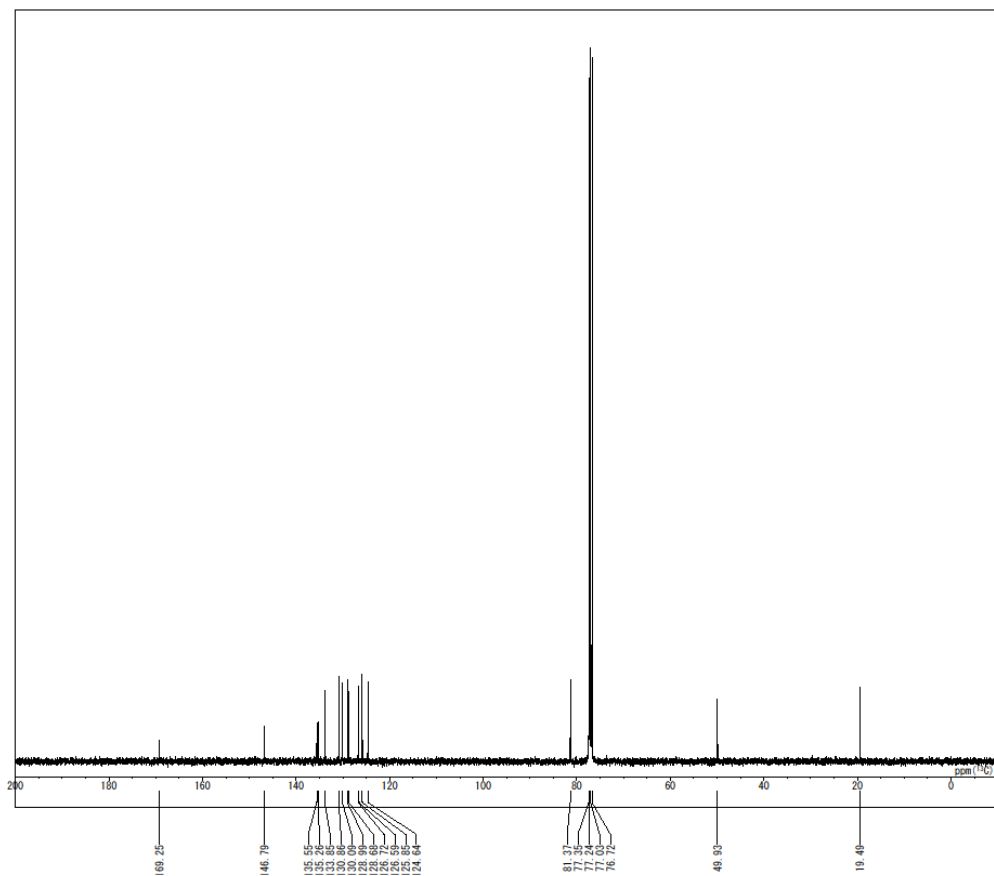

```
DFILE Y:\INDIVIDUALLY精製Y実験関連Y実験データ\
ORFILE Y:\INDIVIDUALLY精製Y実験関連Y実験データ\
DATIM 19/Jan/2022 05:30:08
COMNT
ORNUC 13C
OF1 100.61 MHz
OSSET 0.0 kHz
OFIN 9999.159 Hz
PW1 10.0 us
PW2 10.0 us
PW3 20.0 us
PI1 2.0 ms
PI2 0.0035 ms
PI3 0.0 ms
LOOP1 0
POINT 32768
SCANS 1024
DOMM 2
FREQ 29761.9 Hz
ACQM 1.101 s
FD 2.0 s
RGAIN 99
BF 0.25 Hz
EMOD 2630
FNUC OFF
IFR 0.0 MHz
IRSET 0.0 kHz
IRFIN 0.0 Hz
IRBPW 0 us
IRATN 0
CSPED 20.0 Hz
CTEMP 19.21 °C
PRNT_DATE 2022/Mar/01 21:58:41
```

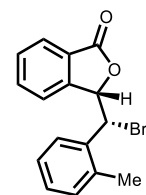

**<sup>13</sup>C NMR of 2k**

# Supporting Information II

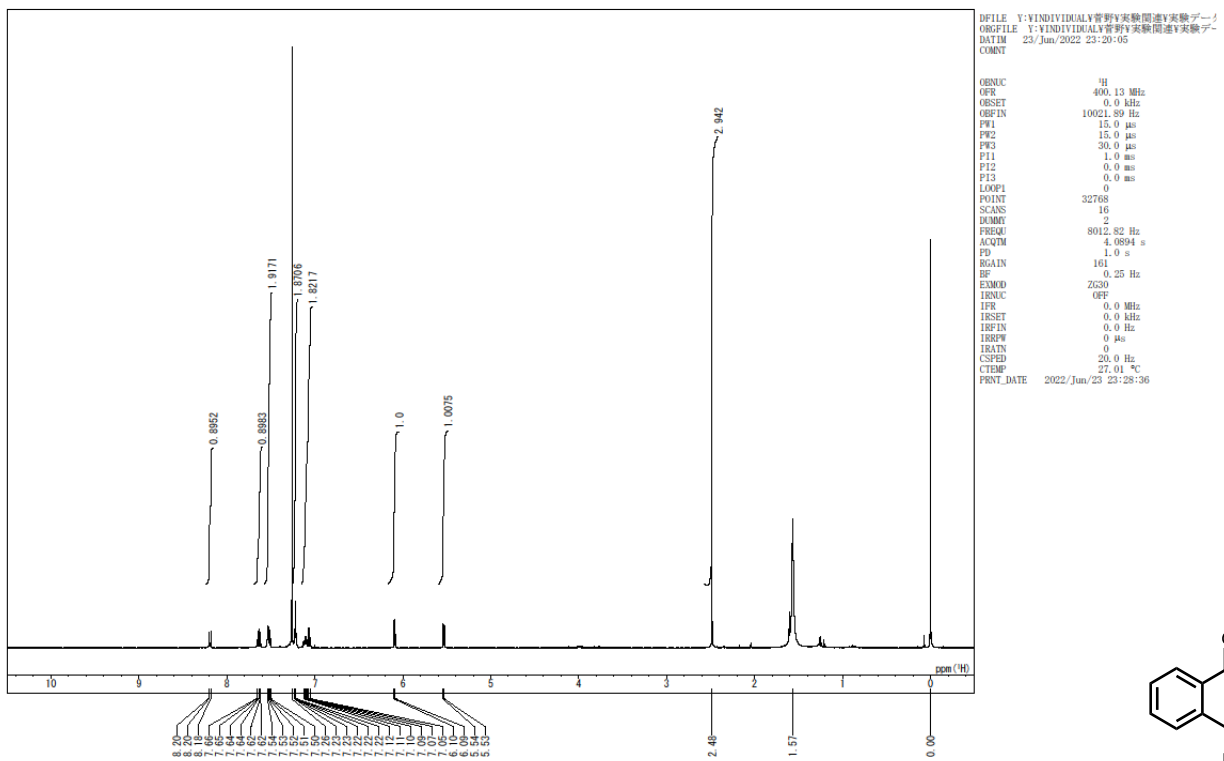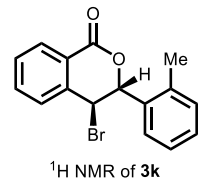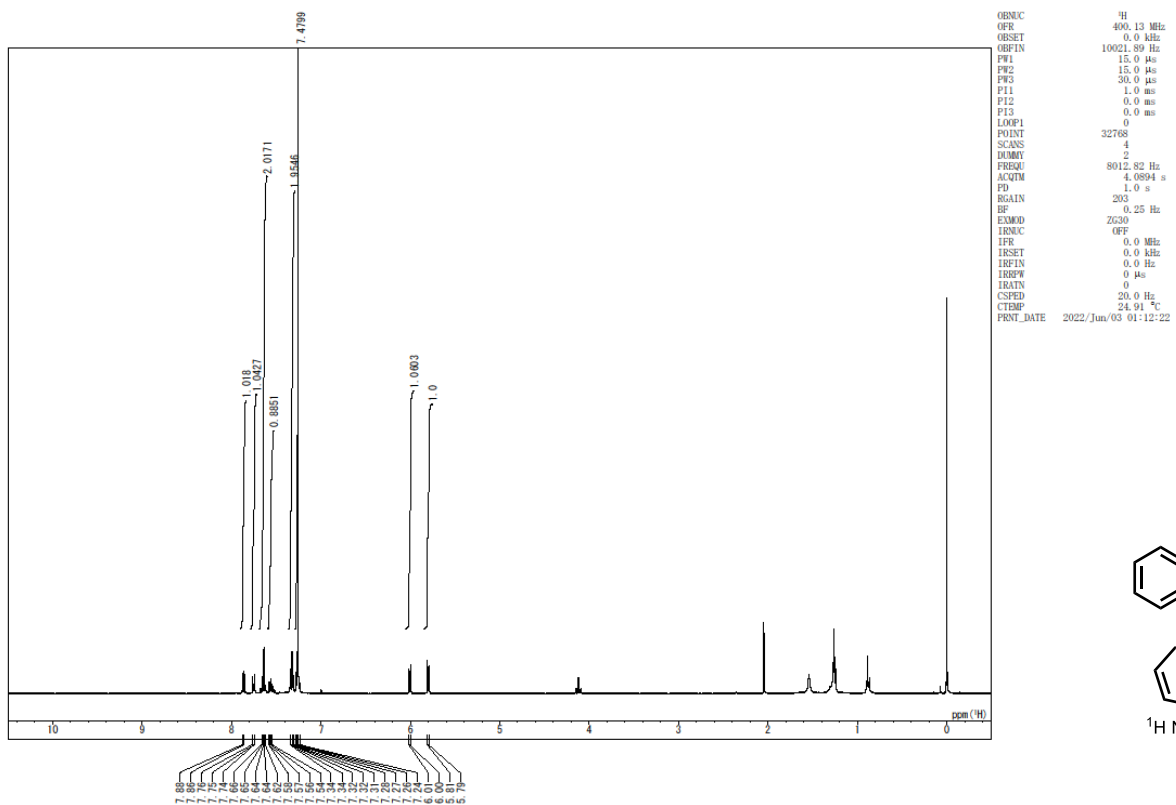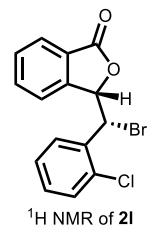

# Supporting Information II

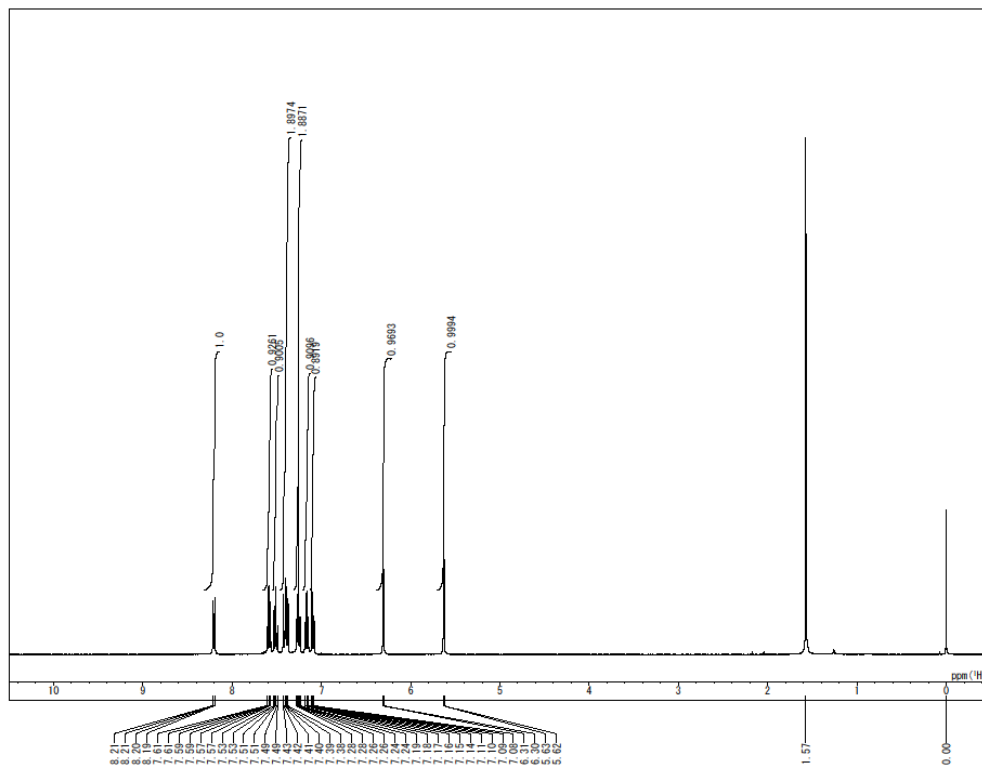

```

DFILE X:\V0620RG\DATA\AVOR\NMR\MISO-CL6-ENDO-H-
ORGFIL X:\V0620RG\DATA\AVOR\NMR\MISO-CL6-ENDO-
DATEM 28/Jun/2022 10:44:44
COMNT

ORNUC 1H
ORF 400.13 MHz
ORSET 0.0 kHz
ORFIN 10021.89 Hz
PW 15.0 μs
PWC 15.0 μs
PWS 30.0 μs
P11 1.0 ms
P12 0.0 ms
P13 0.0 ms
LOOP1 0
POINT 32768
SCANS 16
DUMM 2
FREQ 8012.52 Hz
ACQTM 4.0894 s
PD 1.0 s
RGAIN 144
BF 0.25 Hz
EXMOD 2630
IRNUC 0PF
IFR 0.0 MHz
IRSET 0.0 kHz
IRFIN 0.0 Hz
IRFW 0 μs
IRATN 0
CSFED 20.0 Hz
CTEMP 27.11 °C
PRNT_DATE 2022/Jun/28 10:58:46
    
```

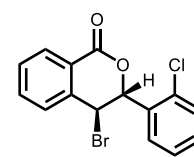

<sup>1</sup>H NMR of 3I

# Supporting Information II

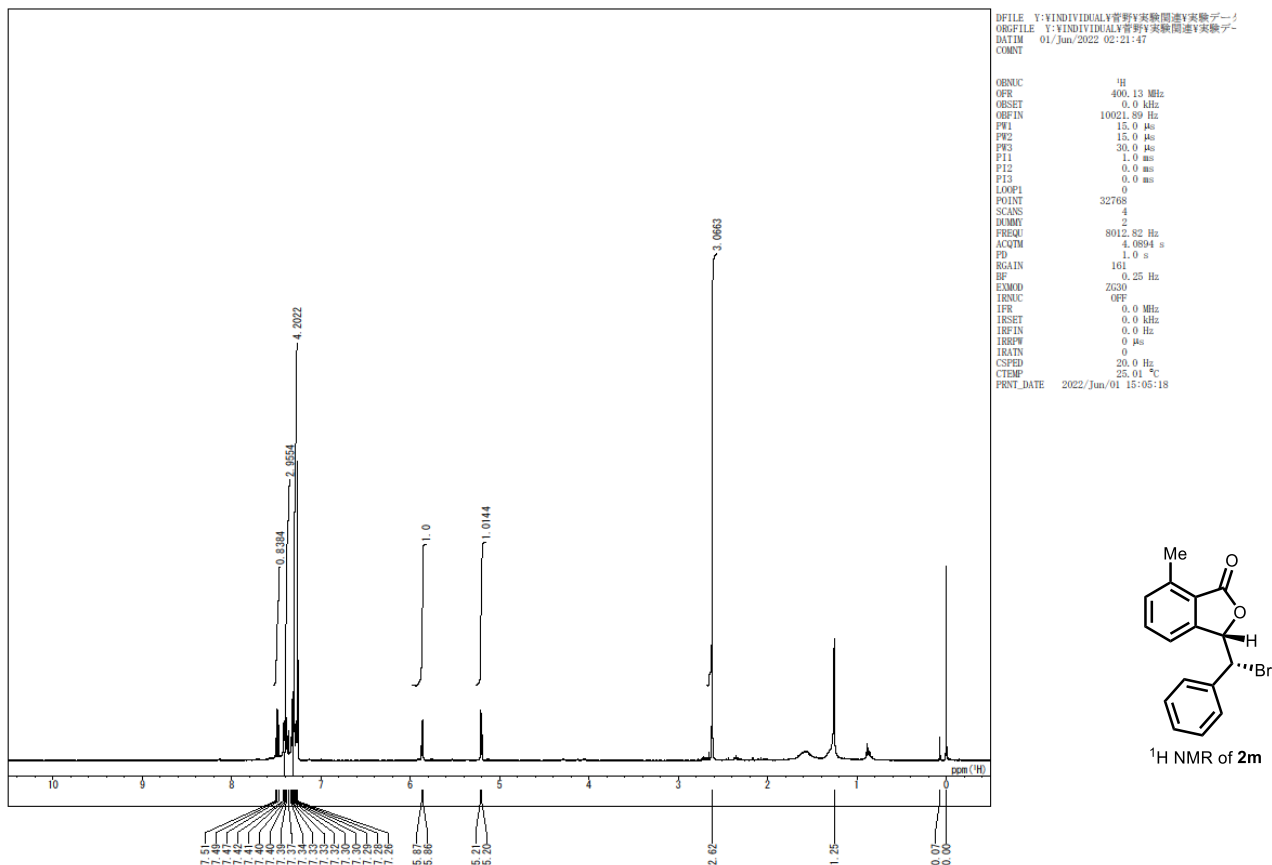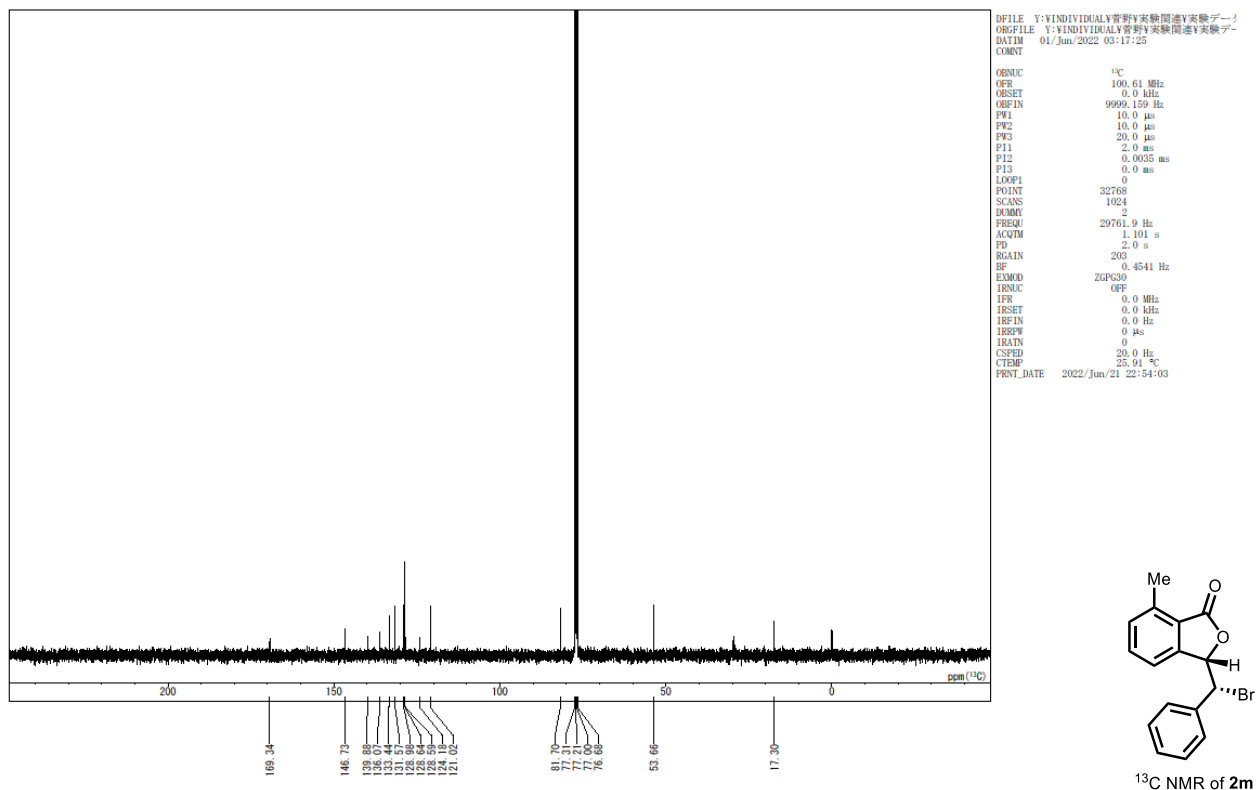



## Supporting Information II

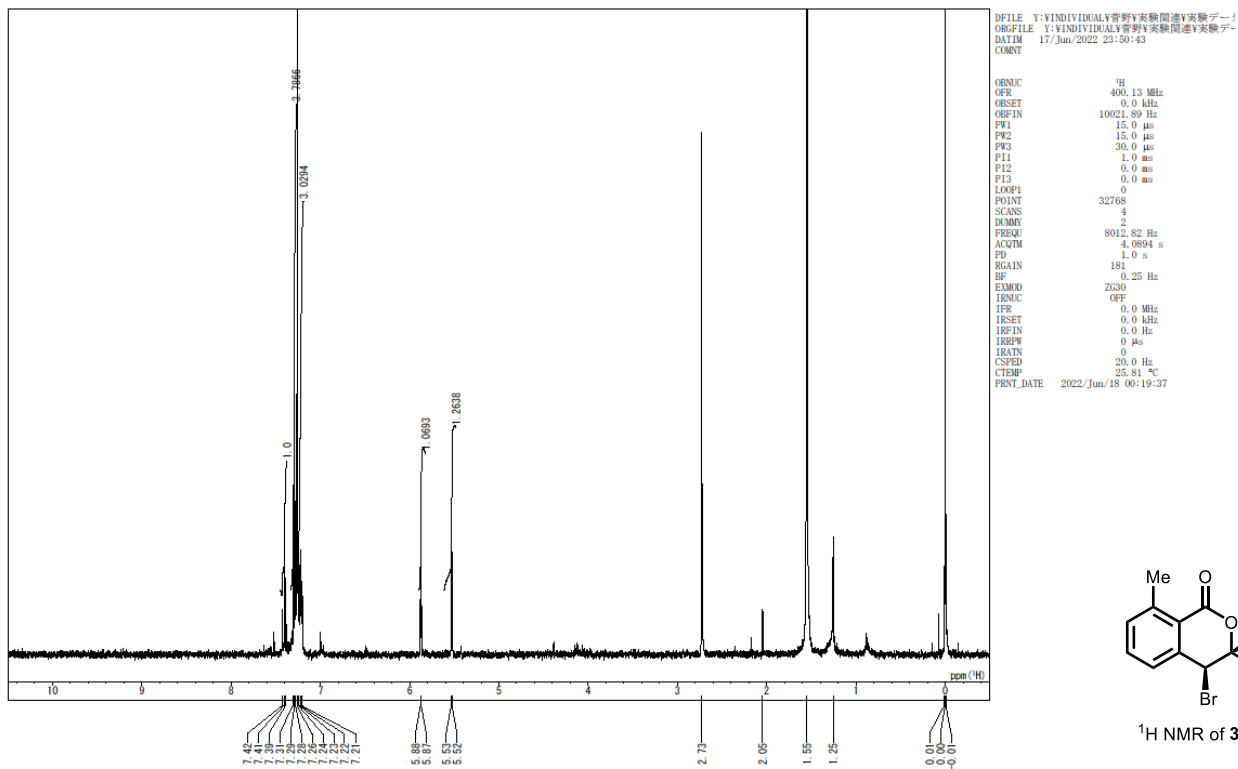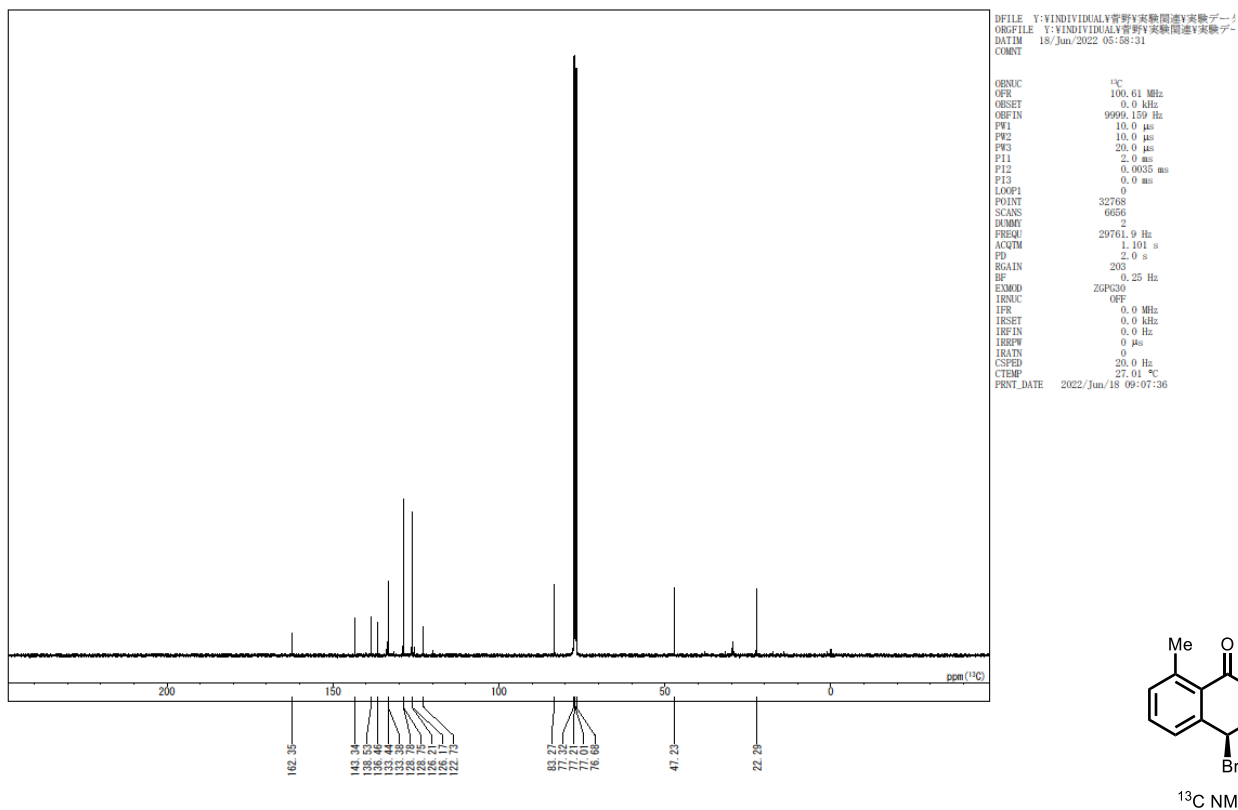

# Supporting Information II

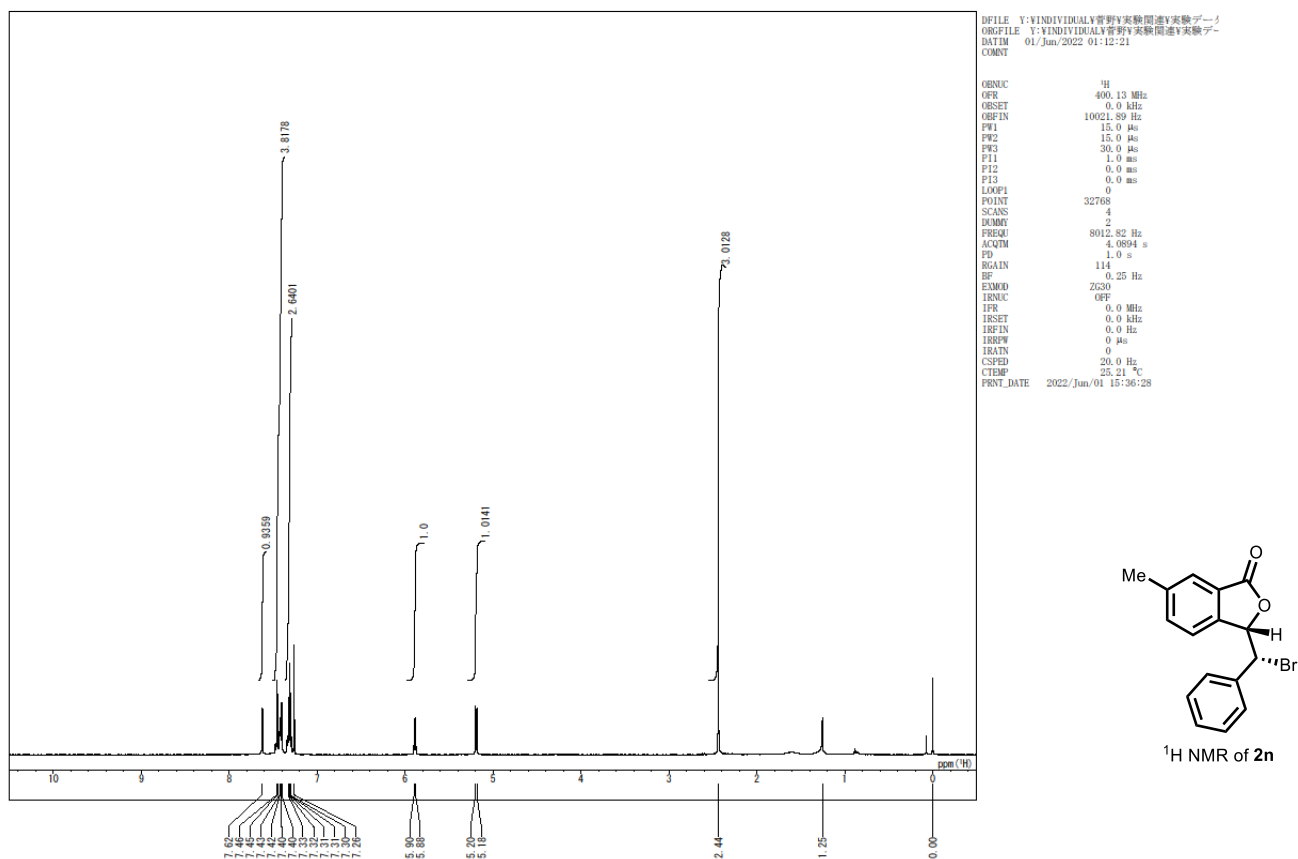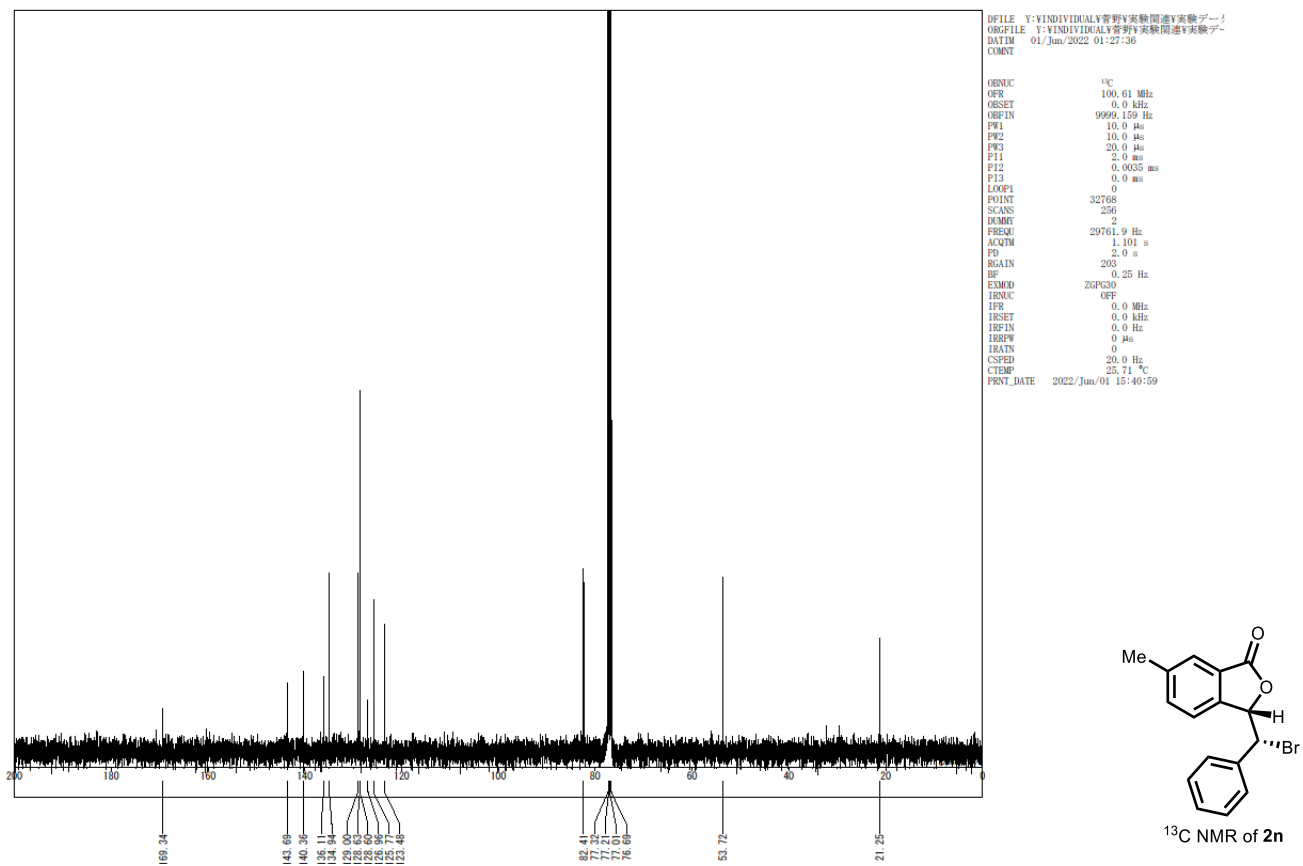

# Supporting Information II

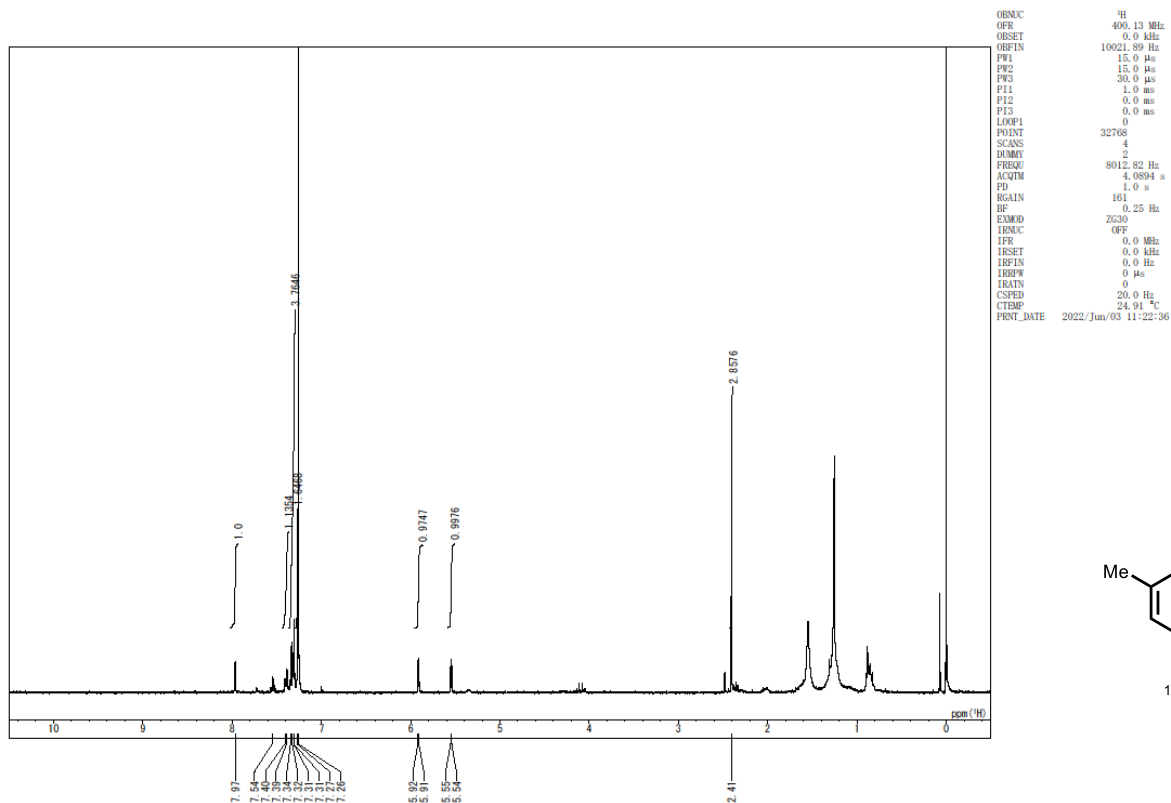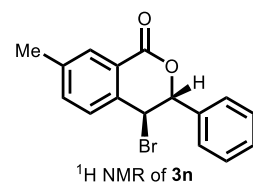

# Supporting Information II

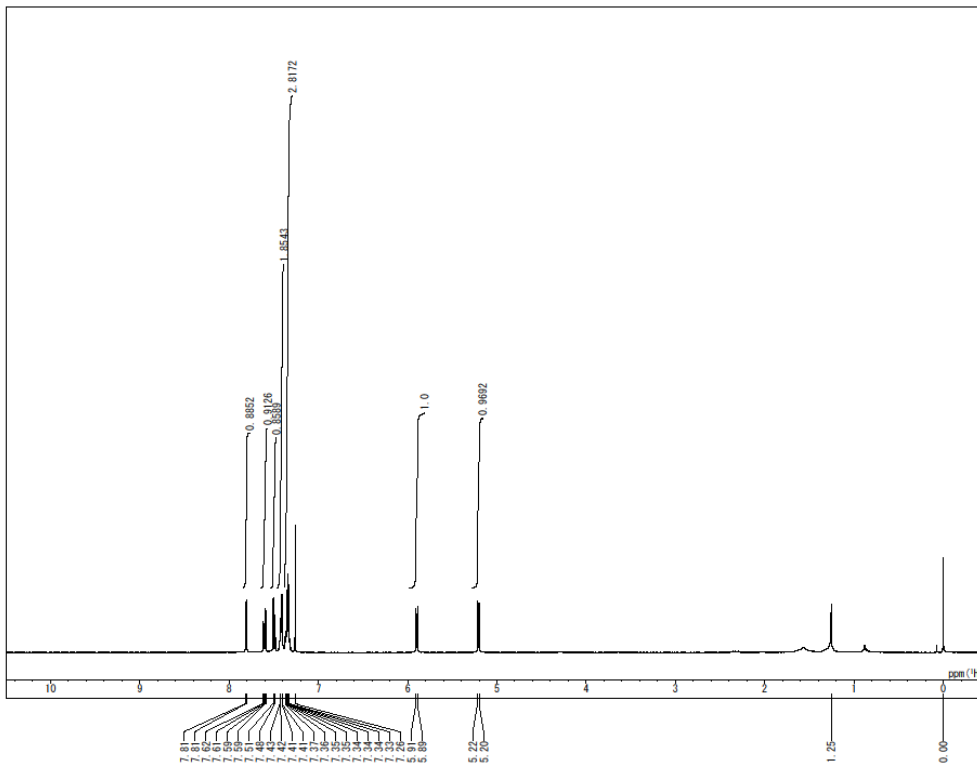

D:\FILE Y:\INDIVIDUALLY\菅野Y実験関連Y実験デー  
 ORGFILE Y:\INDIVIDUALLY\菅野Y実験関連Y実験デー  
 DATIM 01/Jan/2022 01:46:35  
 COMNT  
 ORNUC <sup>1</sup>H  
 OFR 400.13 MHz  
 ORSET 0.0 kHz  
 OFBIN 10021.89 Hz  
 PW1 15.0 μs  
 PW2 15.0 μs  
 PW3 30.0 μs  
 P11 1.0 ms  
 P12 0.0 ms  
 P13 0.0 ms  
 LOOP1 0  
 POINT 32768  
 SCANS 4  
 DOMM 2  
 FREQ 8012.82 Hz  
 ACQTM 4.0894 s  
 PD 1.0 s  
 RGAIN 128  
 BF 0.25 Hz  
 EXMOD 2630  
 INUC OFF  
 IFR 0.0 MHz  
 IRSET 0.0 kHz  
 IREFIN 0.0 Hz  
 IRRPW 0 μs  
 IRATN 0  
 CSFED 20.0 Hz  
 CTEMP 25.11 °C  
 PRNT\_DATE 2022/Jan/11 22:56:22

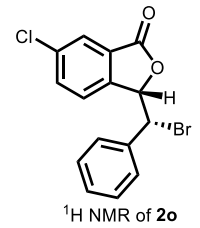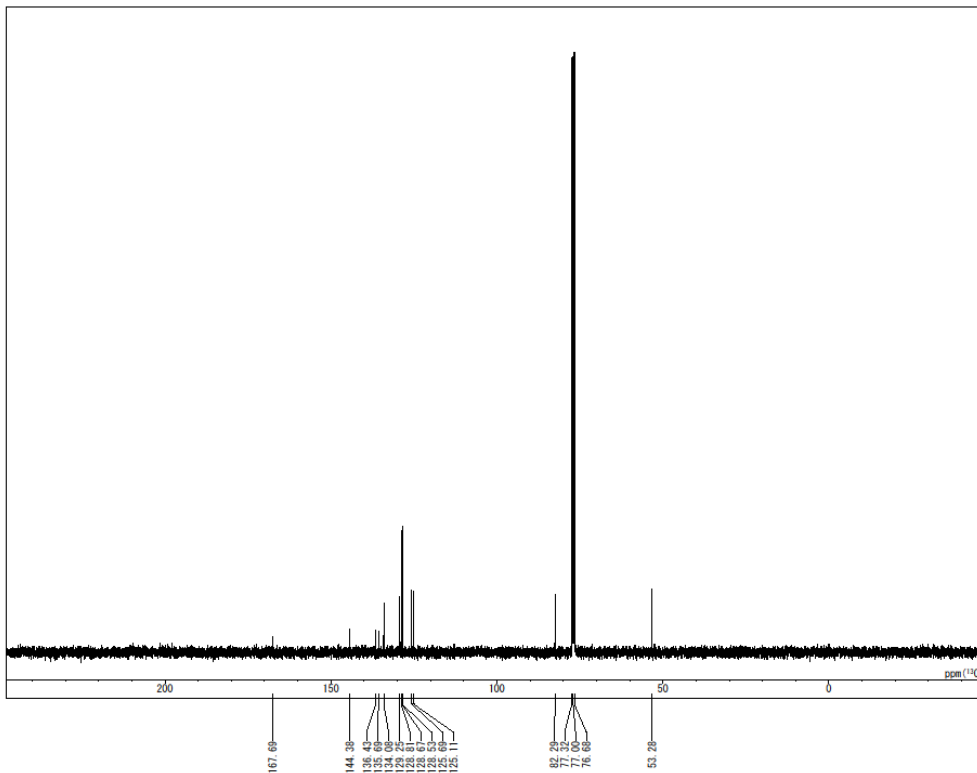

D:\FILE Y:\INDIVIDUALLY\菅野Y実験関連Y実験デー  
 ORGFILE Y:\INDIVIDUALLY\菅野Y実験関連Y実験デー  
 DATIM 01/Jan/2022 02:01:43  
 COMNT  
 ORNUC <sup>13</sup>C  
 OFR 100.61 MHz  
 ORSET 0.0 kHz  
 OFBIN 9999.159 Hz  
 PW1 10.0 μs  
 PW2 10.0 μs  
 PW3 20.0 μs  
 P11 2.0 ms  
 P12 0.0035 ms  
 P13 0.0 ms  
 LOOP1 0  
 POINT 32768  
 SCANS 256  
 DOMM 2  
 FREQ 29761.9 Hz  
 ACQTM 1.101 s  
 PD 2.0 s  
 RGAIN 203  
 BF 0.25 Hz  
 EXMOD 2630  
 INUC OFF  
 IFR 0.0 MHz  
 IRSET 0.0 kHz  
 IREFIN 0.0 Hz  
 IRRPW 0 μs  
 IRATN 0  
 CSFED 20.0 Hz  
 CTEMP 25.81 °C  
 PRNT\_DATE 2022/Jan/11 22:58:37

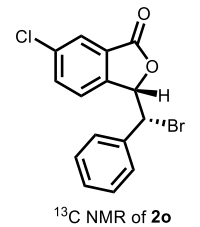

# Supporting Information II

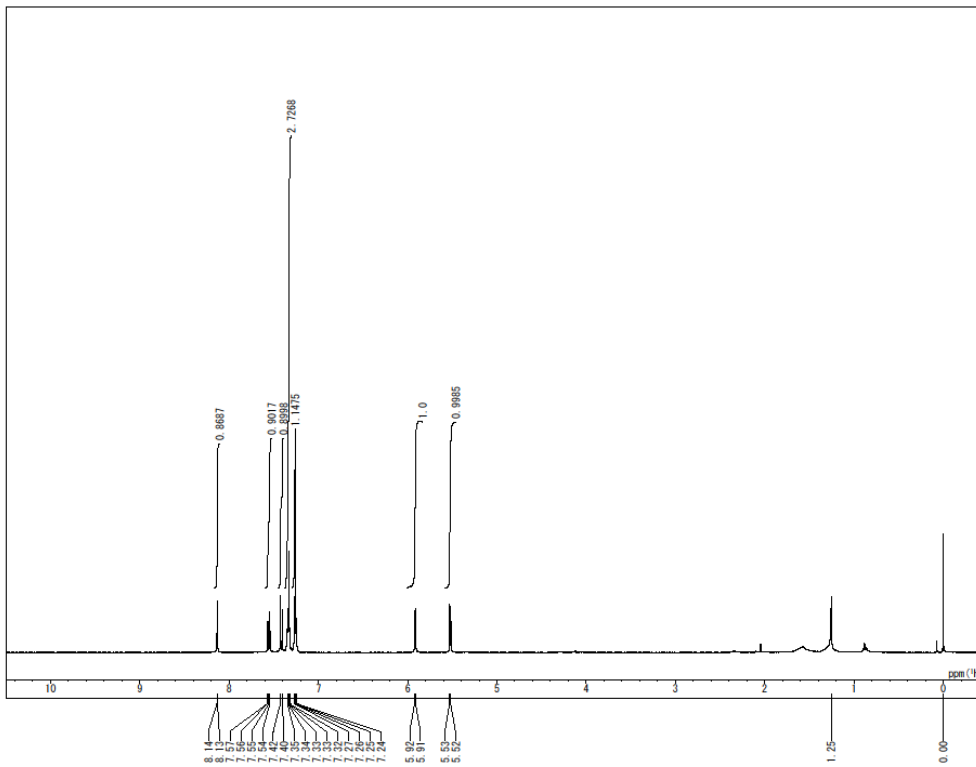

DFILE Y:\INDIVIDUALLY\菅野Y実験関連\Y実験データ  
 ORGFILE Y:\INDIVIDUALLY\菅野Y実験関連\Y実験データ  
 DATIM 11/Jan/2022 19:23:05  
 COMNT  
 ORNUC <sup>1</sup>H  
 OFR 400.13 MHz  
 ORSET 0.0 kHz  
 OFBIN 10021.89 Hz  
 PW1 15.0 μs  
 PW2 15.0 μs  
 PW3 30.0 μs  
 P11 1.0 ms  
 P12 0.0 ms  
 P13 0.0 ms  
 LOOP1 0  
 POINT 32768  
 SCANS 4  
 DOMM 2  
 FREQ 8012.82 Hz  
 ACQTM 4.0894 s  
 PD 1.0 s  
 RGAIN 144  
 BF 0.25 Hz  
 EXMOD 2630  
 INUC OFF  
 IFR 0.0 MHz  
 IRSET 0.0 kHz  
 IREFIN 0.0 Hz  
 IRRPW 0 μs  
 IRATN 0  
 CSFED 20.0 Hz  
 CTEMP 25.21 °C  
 PRNT\_DATE 2022/Jan/11 20:05:17

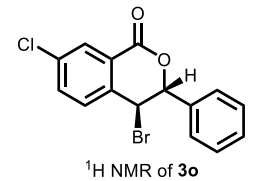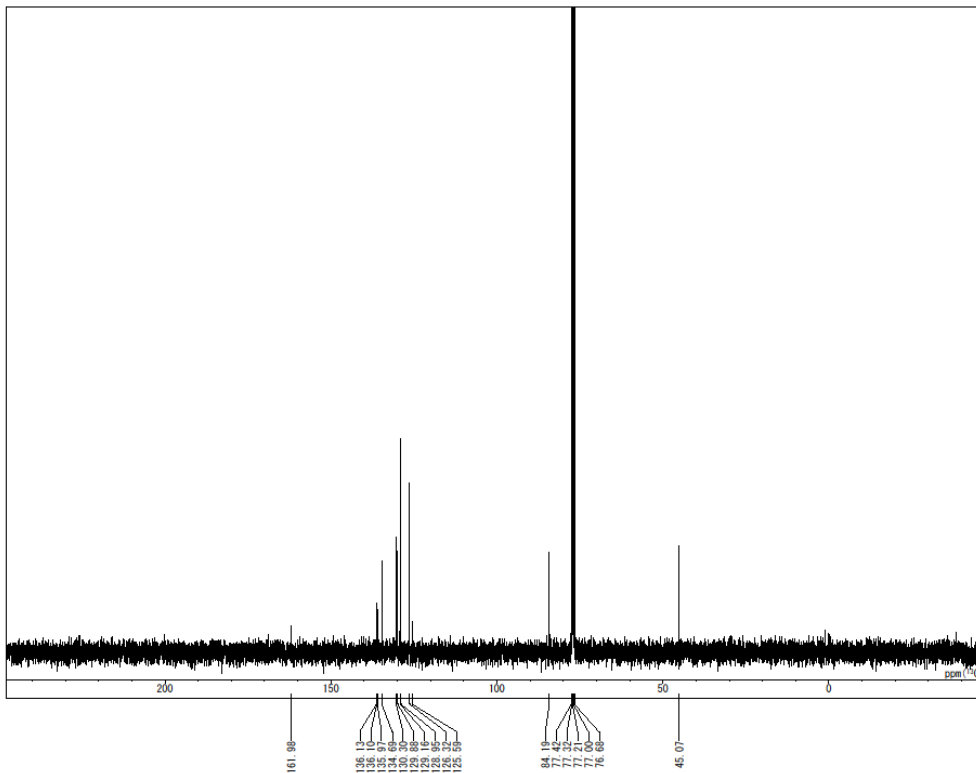

DFILE Y:\INDIVIDUALLY\菅野Y実験関連\Y実験データ  
 ORGFILE Y:\INDIVIDUALLY\菅野Y実験関連\Y実験データ  
 DATIM 11/Jan/2022 19:38:16  
 COMNT  
 ORNUC <sup>13</sup>C  
 OFR 100.61 MHz  
 ORSET 0.0 kHz  
 OFBIN 9999.159 Hz  
 PW1 10.0 μs  
 PW2 10.0 μs  
 PW3 20.0 μs  
 P11 2.0 ms  
 P12 0.0035 ms  
 P13 0.0 ms  
 LOOP1 0  
 POINT 32768  
 SCANS 256  
 DOMM 2  
 FREQ 29761.9 Hz  
 ACQTM 1.101 s  
 PD 2.0 s  
 RGAIN 203  
 BF 0.25 Hz  
 EXMOD ZGPG30  
 INUC OFF  
 IFR 0.0 MHz  
 IRSET 0.0 kHz  
 IREFIN 0.0 Hz  
 IRRPW 0 μs  
 IRATN 0  
 CSFED 20.0 Hz  
 CTEMP 26.01 °C  
 PRNT\_DATE 2022/Jan/11 20:19:13

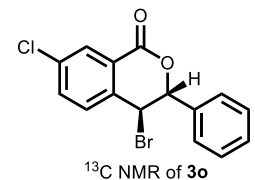

# Supporting Information II

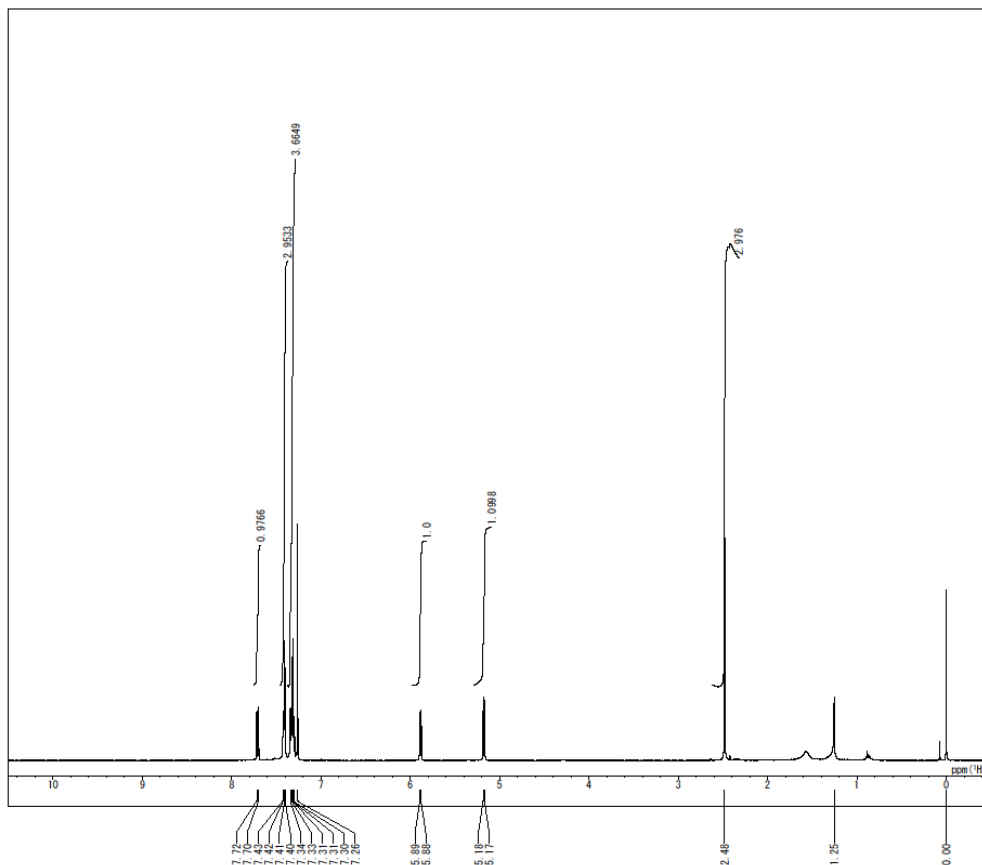

D:\FILE Y:\INDIVIDUALLY\菅野Y実験関連Y実験データ  
 ORGFILE Y:\INDIVIDUALLY\菅野Y実験関連Y実験データ  
 DATIM 31/May/2022 23:43:42  
 COMNT  
  
 ORNUC <sup>1</sup>H  
 OFR 400.13 MHz  
 OBSET 0.0 kHz  
 OFBIN 10021.89 Hz  
 PW1 15.0 μs  
 PW2 15.0 μs  
 PW3 30.0 μs  
 PT1 1.0 ms  
 PT2 0.0 ms  
 PT3 0.0 ms  
 LOOP1 0  
 POINT 32768  
 SCANS 4  
 DDMY 2  
 FREQU 8012.82 Hz  
 ACQTM 4.0894 s  
 FD 1.0 s  
 RGAIN 128  
 BF 0.25 Hz  
 EXMOD ZG30  
 IRNUC OFF  
 IFR 0.0 MHz  
 IRSET 0.0 kHz  
 IREFN 0.0 Hz  
 IRRPW 0 μs  
 IRATN 0  
 CSFED 20.0 Hz  
 CTEMP 25.01 °C  
 PRNT\_DATE 2022/Jun/01 15:17:51

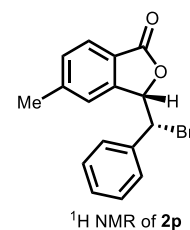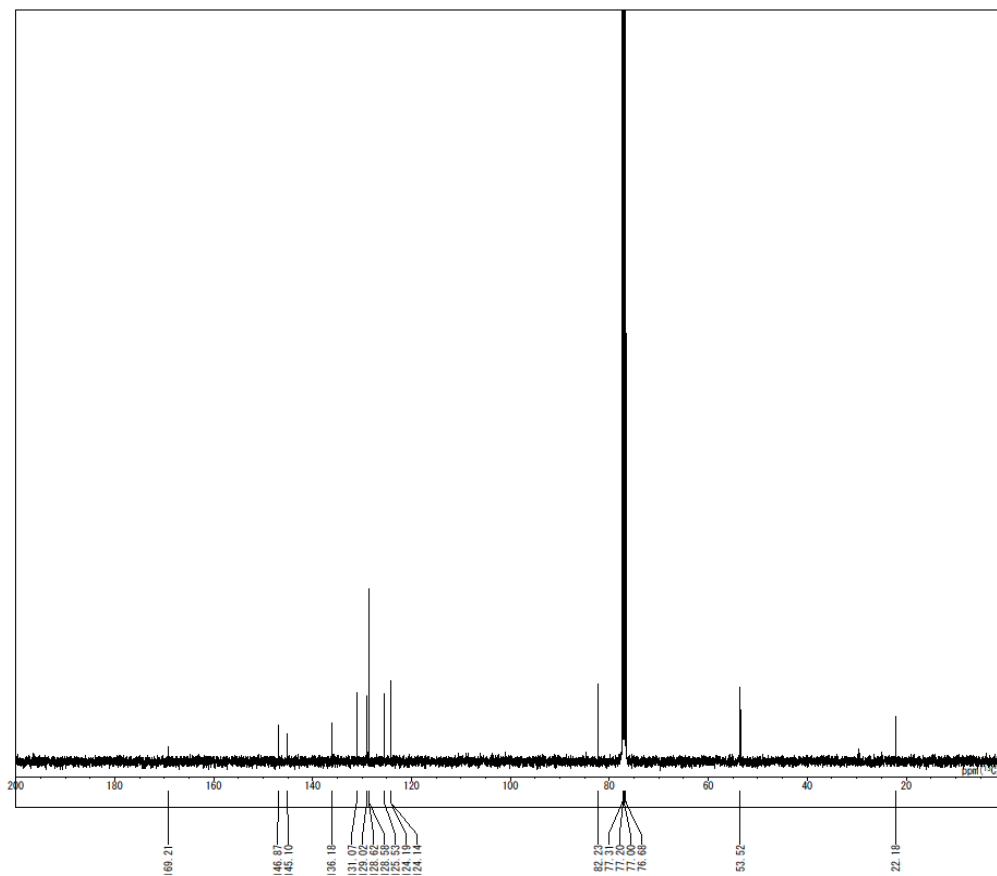

D:\FILE Y:\INDIVIDUALLY\菅野Y実験関連Y実験データ  
 ORGFILE Y:\INDIVIDUALLY\菅野Y実験関連Y実験データ  
 DATIM 01/Jun/2022 00:39:48  
 COMNT  
  
 ORNUC <sup>13</sup>C  
 OFR 100.61 MHz  
 OBSET 0.0 kHz  
 OFBIN 9999.159 Hz  
 PW1 10.0 μs  
 PW2 10.0 μs  
 PW3 20.0 μs  
 PT1 2.0 ms  
 PT2 0.0035 ms  
 PT3 0.0 ms  
 LOOP1 0  
 POINT 32768  
 SCANS 1024  
 DDMY 2  
 FREQU 29761.9 Hz  
 ACQTM 1.101 s  
 FD 2.0 s  
 RGAIN 203  
 BF 0.25 Hz  
 EXMOD ZGPG30  
 IRNUC OFF  
 IFR 0.0 MHz  
 IRSET 0.0 kHz  
 IREFN 0.0 Hz  
 IRRPW 0 μs  
 IRATN 0  
 CSFED 20.0 Hz  
 CTEMP 25.91 °C  
 PRNT\_DATE 2022/Jun/01 15:11:50

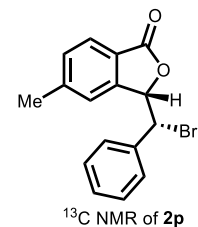

# Supporting Information II

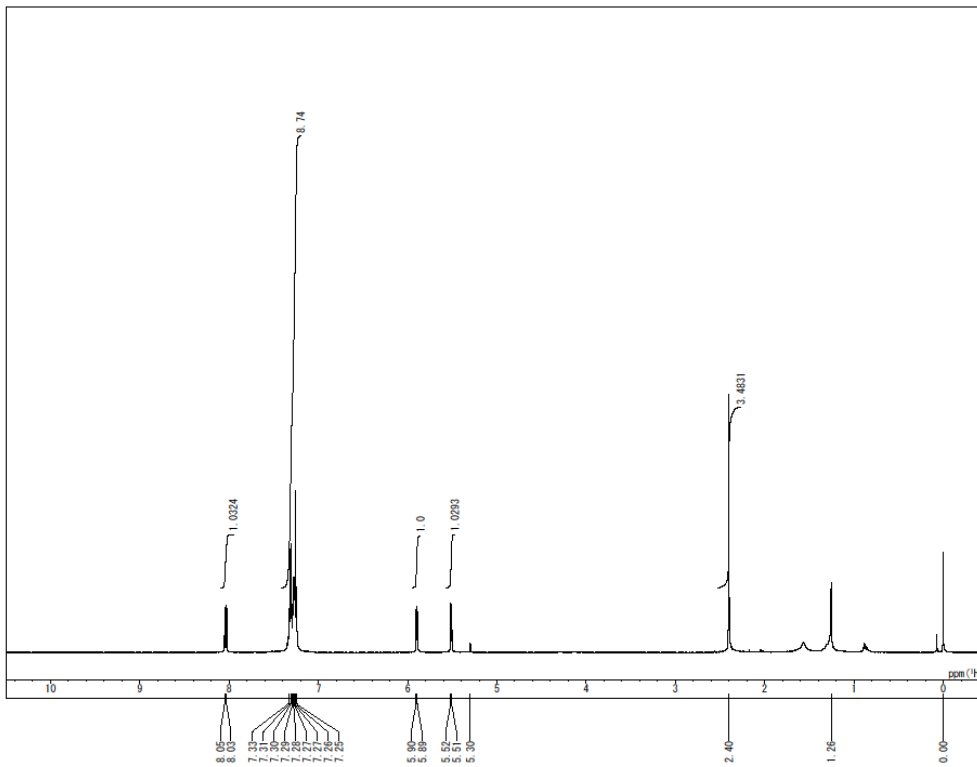

D:\FILE Y:\INDIVIDUALLY\實驗\測定\実験データ  
 ORFFILE Y:\INDIVIDUALLY\實驗\測定\実験データ  
 DATIM 11/Jan/2022 21:42:47  
 COMNT  
 ORNUC <sup>1</sup>H  
 OFR 400.13 MHz  
 ORSET 0.0 kHz  
 OFPIN 10021.89 Hz  
 PW1 15.0 μs  
 PW2 15.0 μs  
 PW3 30.0 μs  
 P11 1.0 ms  
 P12 0.0 ms  
 P13 0.0 ms  
 LOOP1 0  
 POINT 32768  
 SCANS 4  
 DUMMY 2  
 FREQ 8012.82 Hz  
 ACQTM 4.0894 s  
 PD 1.0 s  
 RGAIN 144  
 BF 0.1223 Hz  
 EXMOD ZG30  
 INUC OFF  
 IFR 0.0 MHz  
 IRSET 0.0 kHz  
 IREFIN 0.0 Hz  
 IRRPW 0 μs  
 IRATN 0  
 CSPED 20.0 Hz  
 CTEMP 25.01 °C  
 PRNT\_DATE 2022/Jan/21 22:37:47

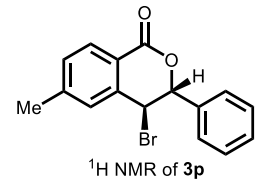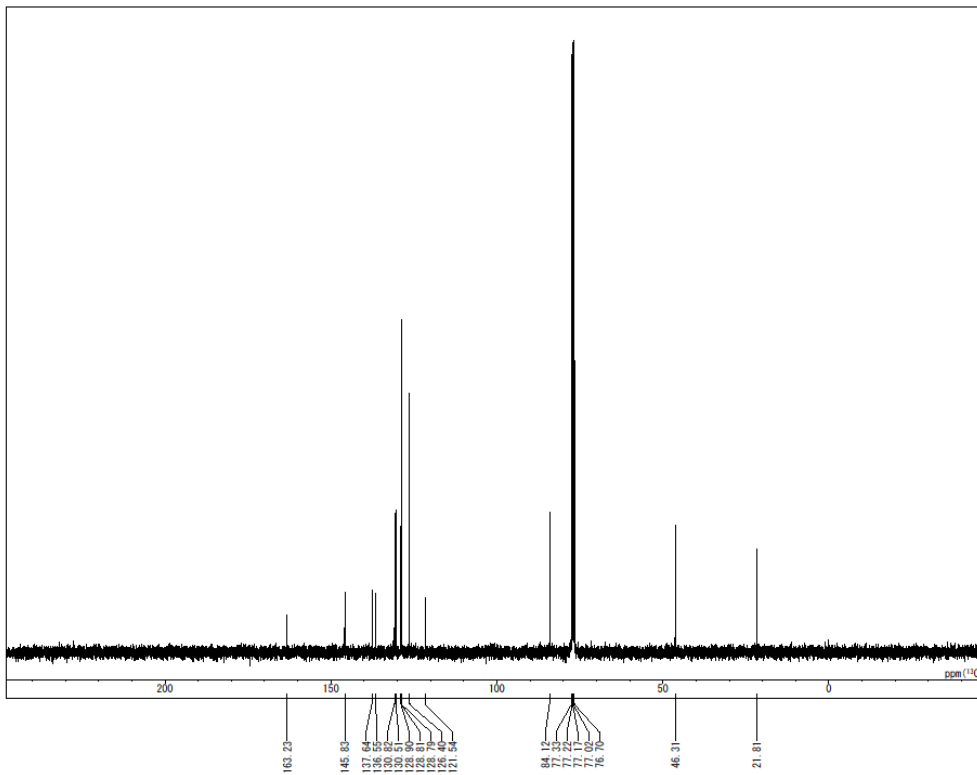

D:\FILE X:\06208\DATA\06208\NMR\MS4-ME6-ENDO-C-  
 ORFFILE X:\06208\DATA\06208\NMR\MS4-ME6-ENDO-  
 DATIM 18/Jan/2022 09:43:14  
 COMNT  
 ORNUC <sup>13</sup>C  
 OFR 100.61 MHz  
 ORSET 0.0 kHz  
 OFPIN 9999.159 Hz  
 PW1 10.0 μs  
 PW2 10.0 μs  
 PW3 20.0 μs  
 P11 2.0 ms  
 P12 0.0035 ms  
 P13 0.0 ms  
 LOOP1 0  
 POINT 32768  
 SCANS 256  
 DUMMY 2  
 FREQ 29761.9 Hz  
 ACQTM 1.101 s  
 PD 2.0 s  
 RGAIN 203  
 BF 0.25 Hz  
 EXMOD ZGPG30  
 INUC OFF  
 IFR 0.0 MHz  
 IRSET 0.0 kHz  
 IREFIN 0.0 Hz  
 IRRPW 0 μs  
 IRATN 0  
 CSPED 20.0 Hz  
 CTEMP 26.91 °C  
 PRNT\_DATE 2022/Jan/18 10:09:29

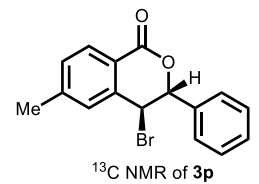

## Supporting Information II

### 2. Copies of HPLC charts

(±)-2a

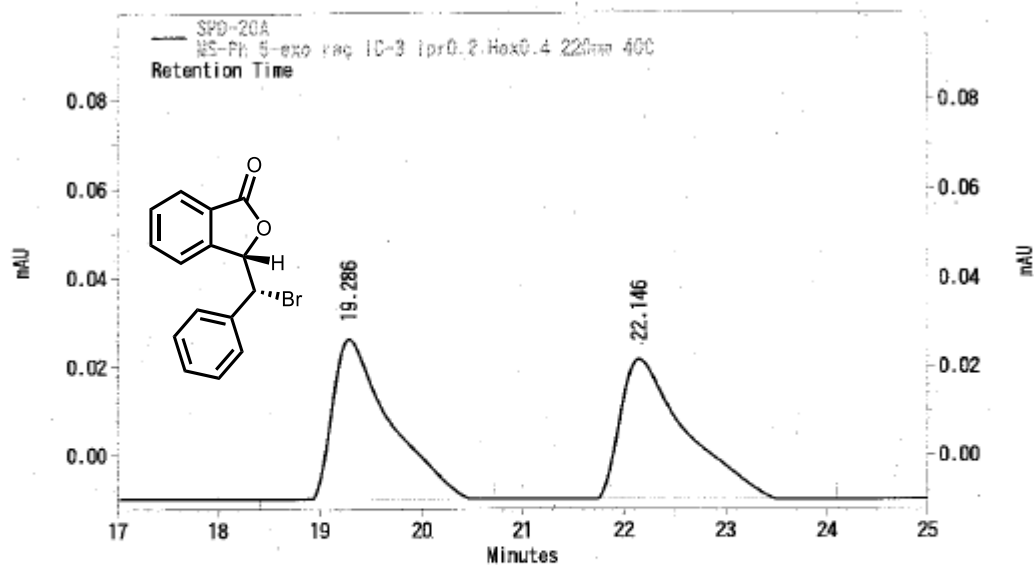

4

| Name   | Retention Time | Area    | Area Percent | Height |
|--------|----------------|---------|--------------|--------|
| 1      | 19.286         | 1404296 | 50.062       | 36027  |
| 2      | 22.146         | 1400803 | 49.938       | 31468  |
| Totals |                | 2805099 | 100.000      | 67495  |

(3R,8S)-2a in Table 2, entry 10 (92:8 er)

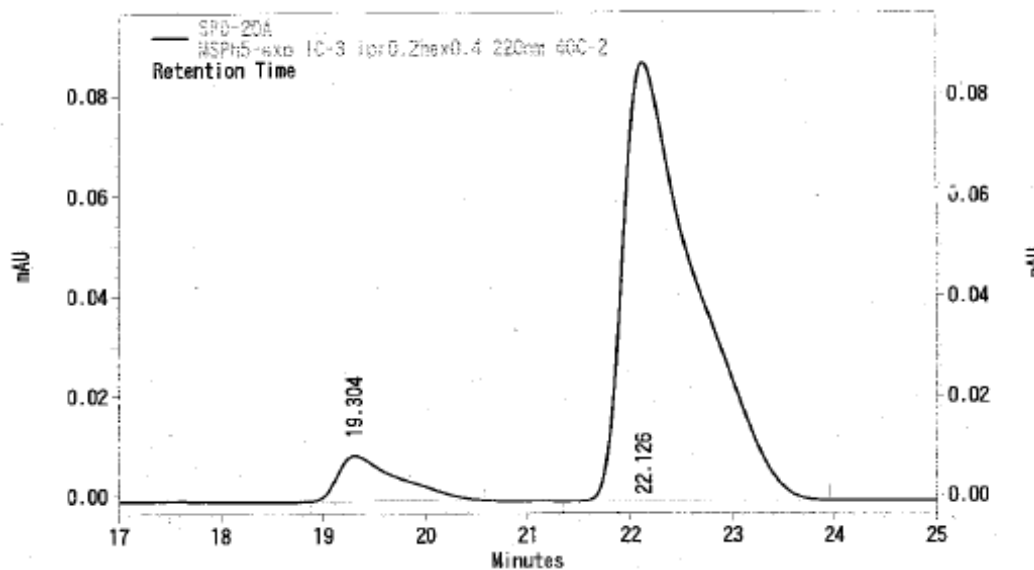

4

| Name   | Retention Time | Area    | Area Percent | Height |
|--------|----------------|---------|--------------|--------|
| 1      | 19.304         | 376978  | 8.050        | 9098   |
| 2      | 22.126         | 4305967 | 91.950       | 87537  |
| Totals |                | 4682945 | 100.000      | 96635  |



## Supporting Information II

(±)-2b

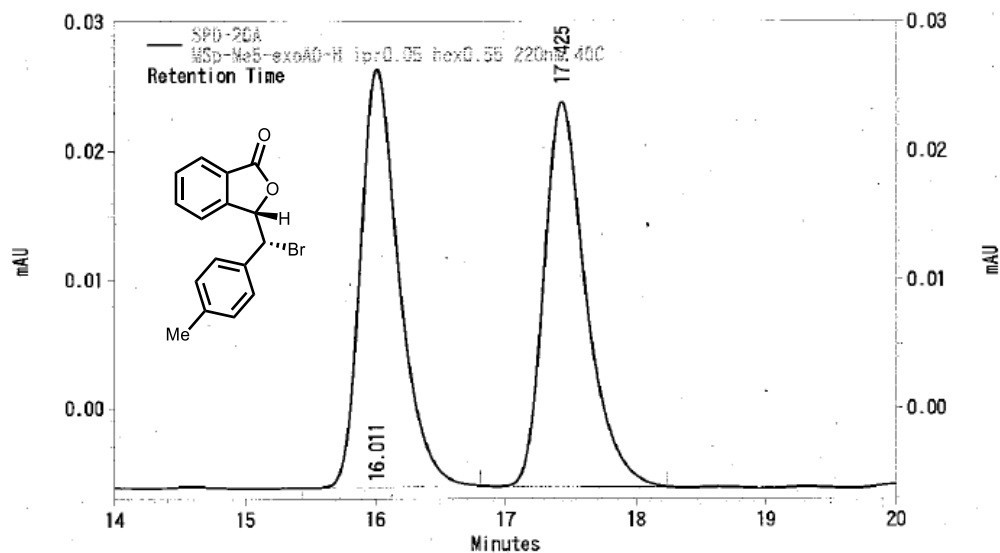

4

| Name          | Retention Time | Area           | Area Percent   | Height       |
|---------------|----------------|----------------|----------------|--------------|
| 1             | 16.011         | 664650         | 49.875         | 32488        |
| 2             | 17.425         | 667984         | 50.125         | 29887        |
| <b>Totals</b> |                | <b>1332634</b> | <b>100.000</b> | <b>62375</b> |

(3R,8S)-2b in Table 3, entry 1 (94:6 er)

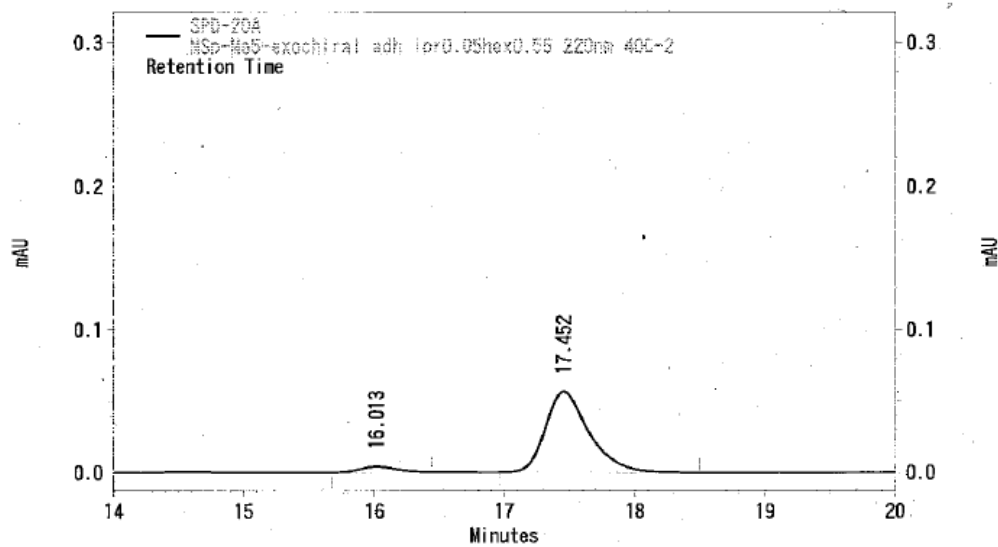

4

| Name          | Retention Time | Area           | Area Percent   | Height       |
|---------------|----------------|----------------|----------------|--------------|
| 1             | 16.013         | 79162          | 5.736          | 4082         |
| 2             | 17.452         | 1300979        | 94.264         | 56566        |
| <b>Totals</b> |                | <b>1380141</b> | <b>100.000</b> | <b>60648</b> |

## Supporting Information II

(±)-2c

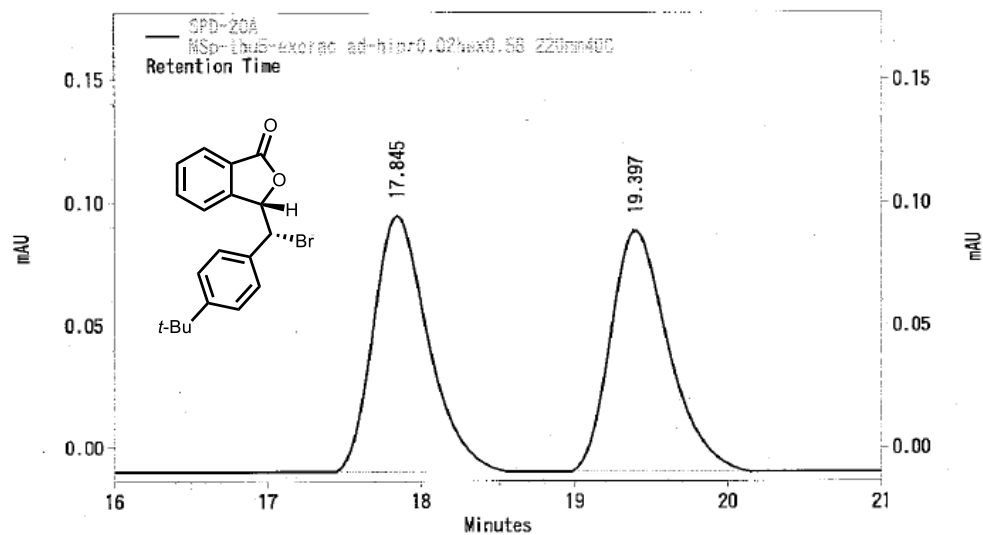

| Name   | Retention Time | Area    | Area Percent | Height |
|--------|----------------|---------|--------------|--------|
| 1      | 17.845         | 2584956 | 49.948       | 104385 |
| 2      | 19.397         | 2590310 | 50.052       | 98285  |
| Totals |                | 5175266 | 100.000      | 202670 |

(3R,8S)-2c in Table 2, entry 2 (91:9 er)

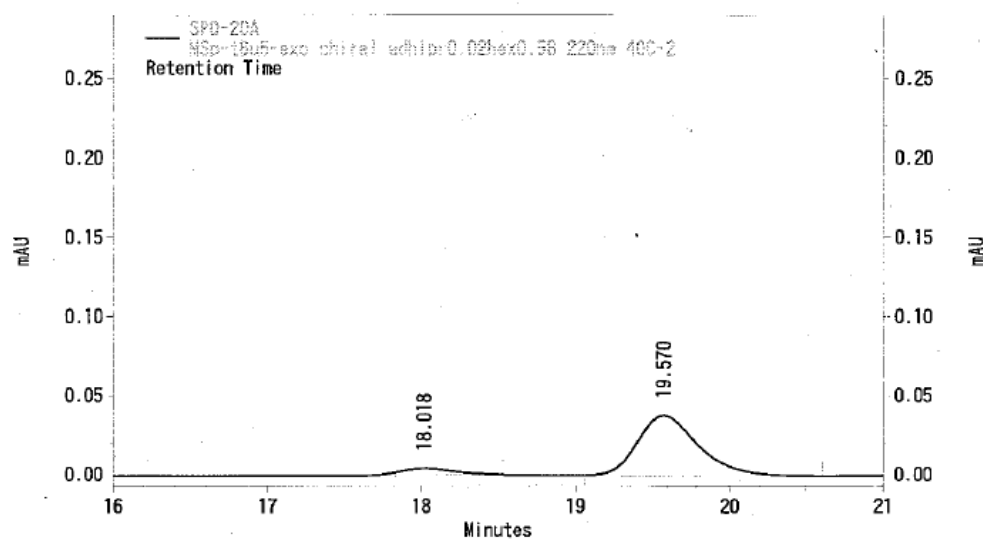

| Name   | Retention Time | Area    | Area Percent | Height |
|--------|----------------|---------|--------------|--------|
| 1      | 18.018         | 106549  | 9.314        | 4356   |
| 2      | 19.570         | 1037464 | 90.686       | 37965  |
| Totals |                | 1144013 | 100.000      | 42321  |

## Supporting Information II

(±)-2d

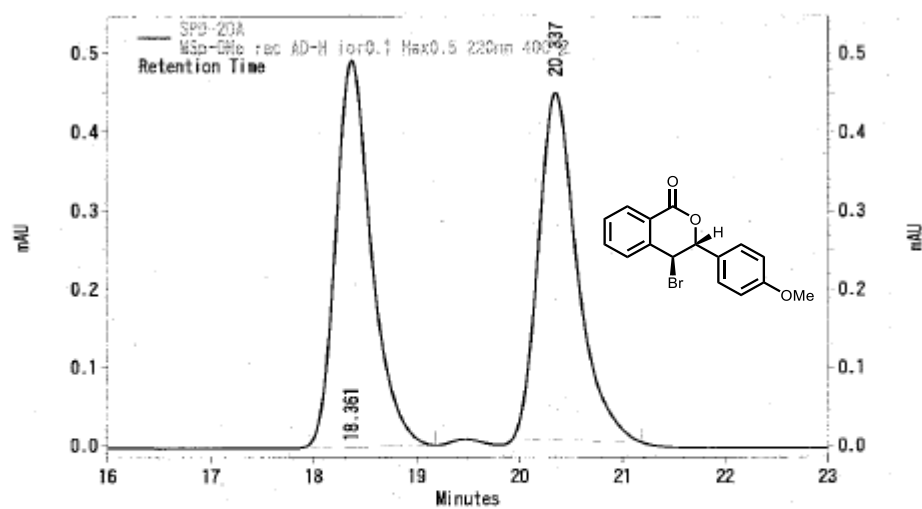

4

| Name          | Retention Time | Area            | Area Percent   | Height        |
|---------------|----------------|-----------------|----------------|---------------|
| 1             | 18.361         | 11869990        | 50.599         | 492565        |
| 2             | 20.337         | 11588846        | 49.401         | 442718        |
| <b>Totals</b> |                | <b>23458836</b> | <b>100.000</b> | <b>935283</b> |

(3*SR*,8*RS*)-2d in Table 3, entry 3 (50:50 er)

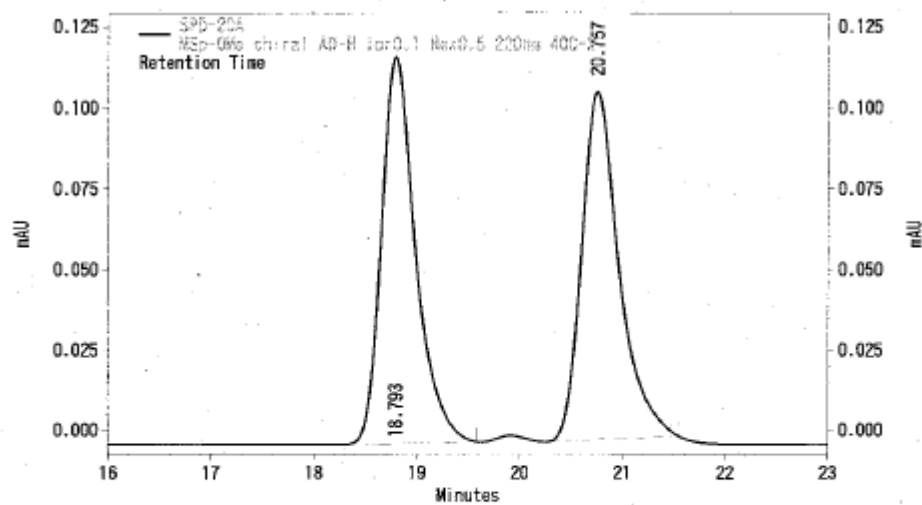

4

| Name          | Retention Time | Area           | Area Percent   | Height        |
|---------------|----------------|----------------|----------------|---------------|
| 1             | 18.793         | 2761135        | 50.266         | 119724        |
| 2             | 20.757         | 2731954        | 49.734         | 107786        |
| <b>Totals</b> |                | <b>5493089</b> | <b>100.000</b> | <b>227510</b> |

## Supporting Information II

(±)-2e

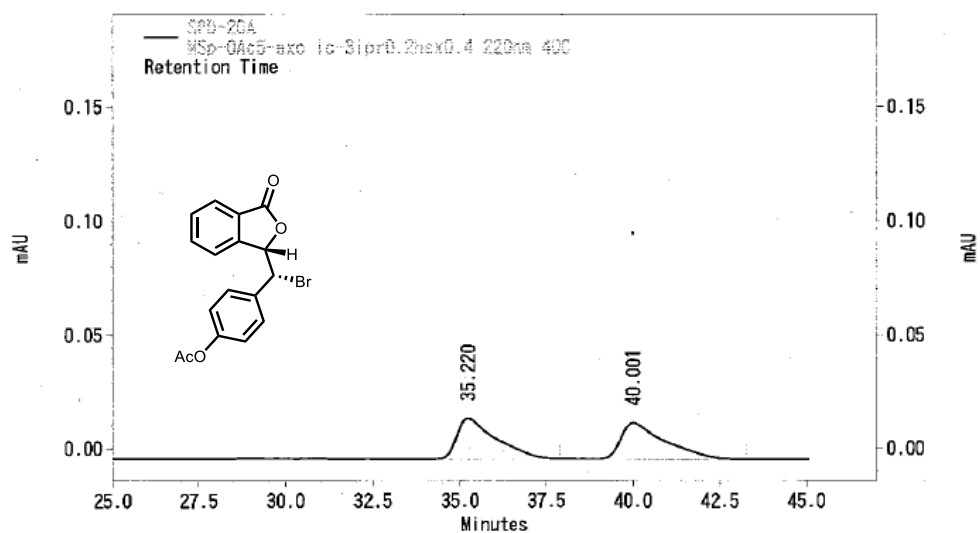

4

| Name   | Retention Time | Area    | Area Percent | Height |
|--------|----------------|---------|--------------|--------|
| 1      | 35.220         | 1377200 | 49.799       | 17834  |
| 2      | 40.001         | 1388336 | 50.201       | 15851  |
| Totals |                | 2765536 | 100.000      | 33685  |

(3*R*,8*S*)-2e in Table 3, entry 4 (68:32 er)

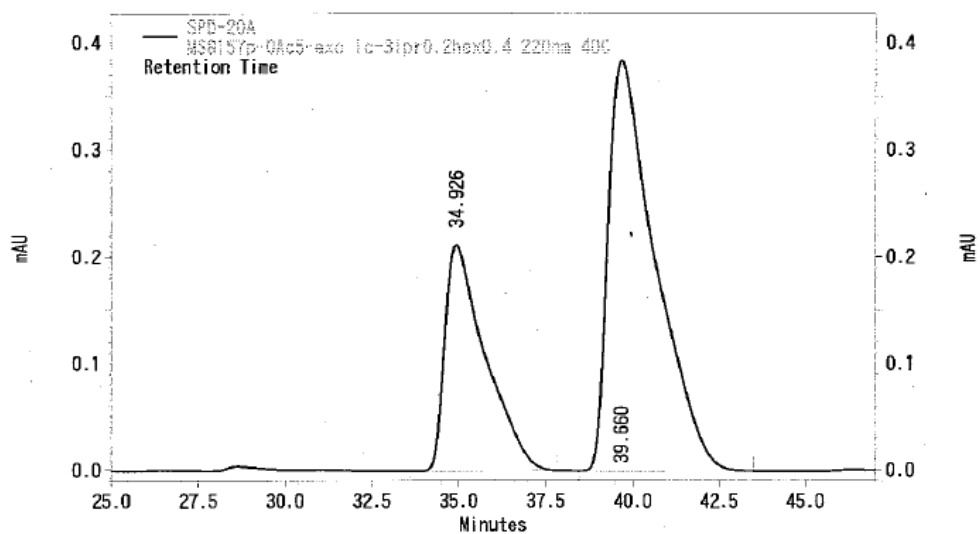

4

| Name   | Retention Time | Area     | Area Percent | Height |
|--------|----------------|----------|--------------|--------|
| 1      | 34.926         | 17152286 | 31.950       | 212094 |
| 2      | 39.660         | 36533271 | 68.050       | 383896 |
| Totals |                | 53685557 | 100.000      | 595990 |

## Supporting Information II

(±)-2f

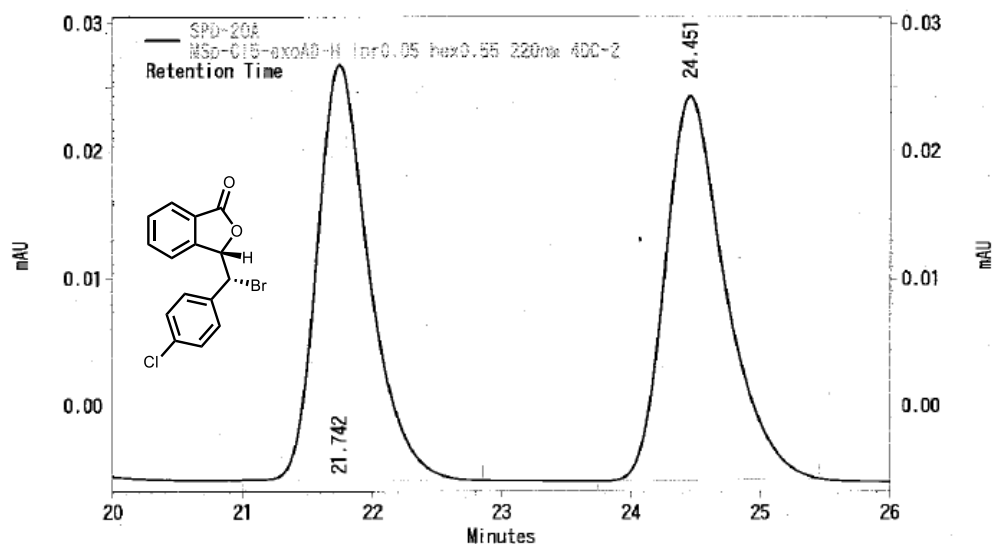

4

| Name   | Retention Time | Area    | Area Percent | Height |
|--------|----------------|---------|--------------|--------|
| 1      | 21.742         | 910001  | 48.213       | 32651  |
| 2      | 24.451         | 977471  | 51.787       | 30212  |
| Totals |                | 1887472 | 100.000      | 62863  |

(3R,8S)-2f in Table 3, entry 5 (86:14 er)

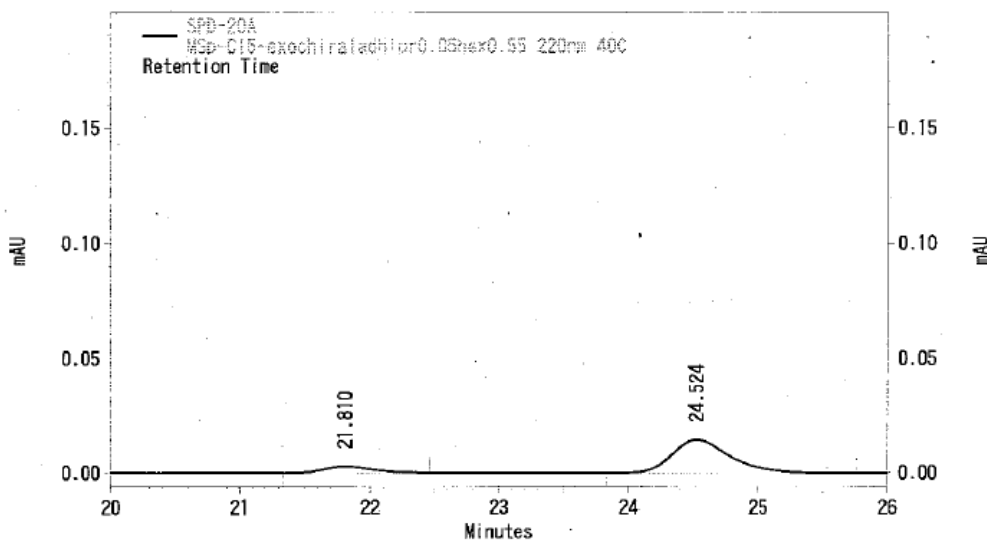

4

| Name   | Retention Time | Area   | Area Percent | Height |
|--------|----------------|--------|--------------|--------|
| 1      | 21.810         | 74933  | 14.168       | 2872   |
| 2      | 24.524         | 453945 | 85.832       | 14593  |
| Totals |                | 528878 | 100.000      | 17465  |

## Supporting Information II

(±)-2h

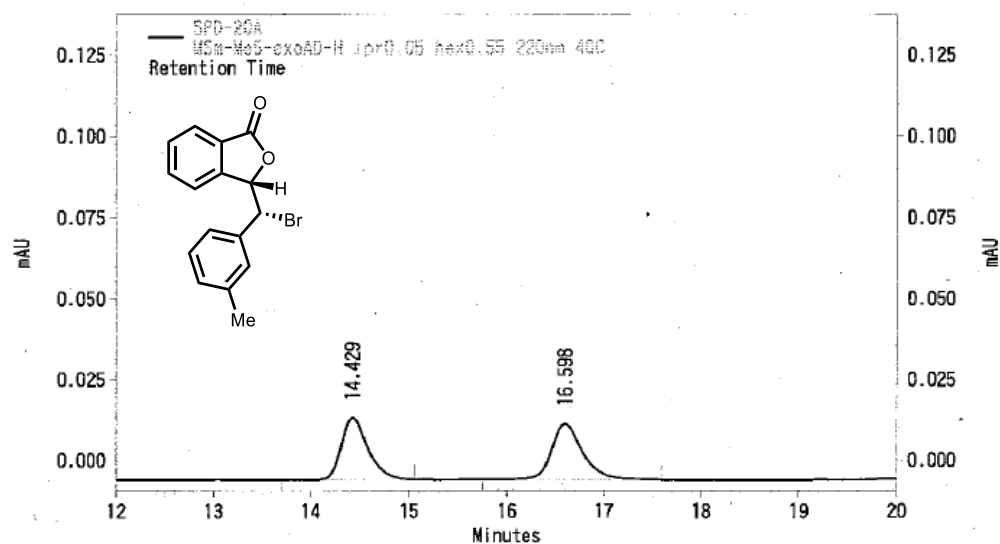

4

| Name          | Retention Time | Area          | Area Percent   | Height       |
|---------------|----------------|---------------|----------------|--------------|
| 1             | 14.429         | 357460        | 48.449         | 19152        |
| 2             | 16.598         | 380353        | 51.551         | 17208        |
| <b>Totals</b> |                | <b>737813</b> | <b>100.000</b> | <b>36360</b> |

(3R,8S)-2h in Table 3, entry 7 (93:7 er)

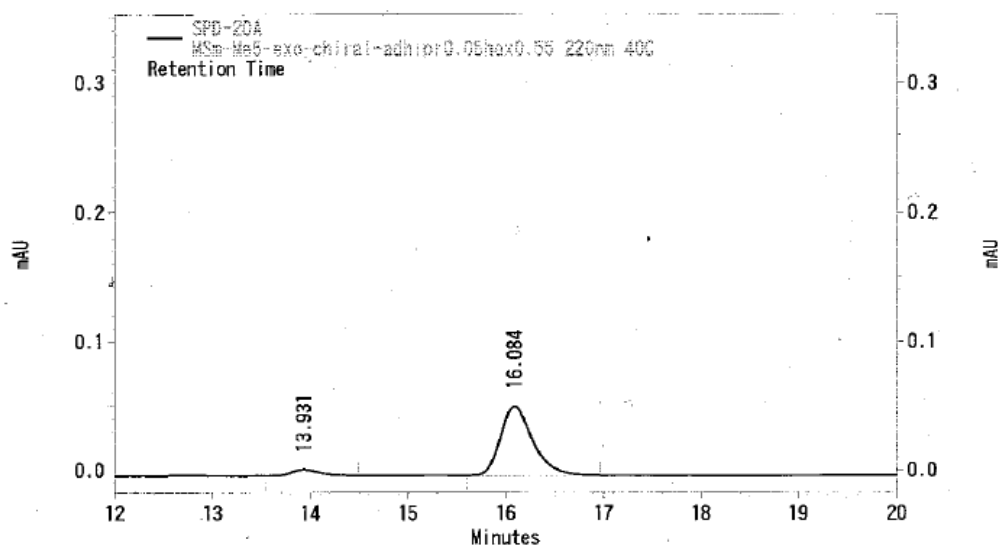

4

| Name          | Retention Time | Area           | Area Percent   | Height       |
|---------------|----------------|----------------|----------------|--------------|
| 1             | 13.931         | 97786          | 7.338          | 4856         |
| 2             | 16.084         | 1234733        | 92.662         | 53815        |
| <b>Totals</b> |                | <b>1332519</b> | <b>100.000</b> | <b>58671</b> |

## Supporting Information II

(±)-2i

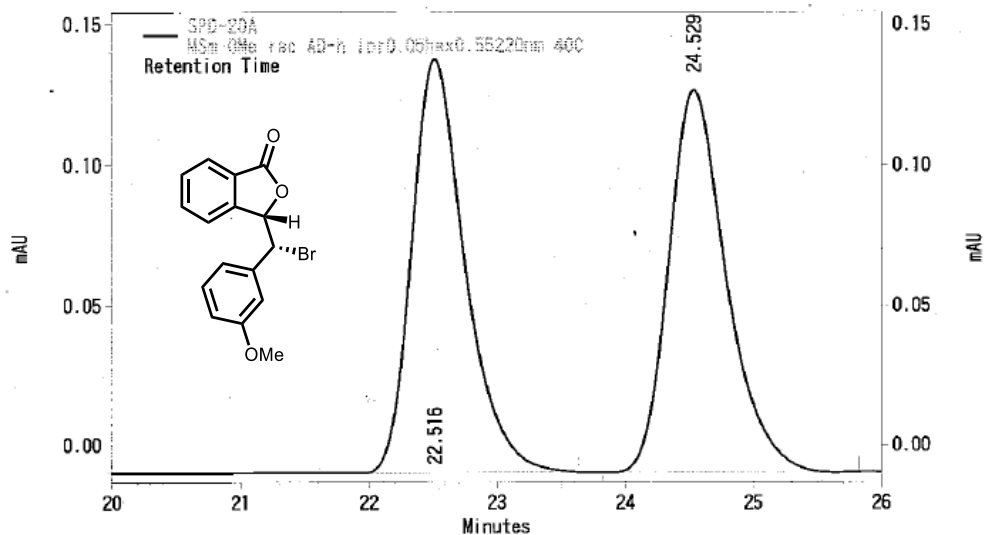

4

| Name   | Retention Time | Area    | Area Percent | Height |
|--------|----------------|---------|--------------|--------|
| 1      | 22.516         | 4267014 | 50.011       | 147336 |
| 2      | 24.529         | 4265156 | 49.989       | 136350 |
| Totals |                | 8532170 | 100.000      | 283686 |

(3*R*,8*S*)-2i in Table 3, entry 8 (88:12 er)

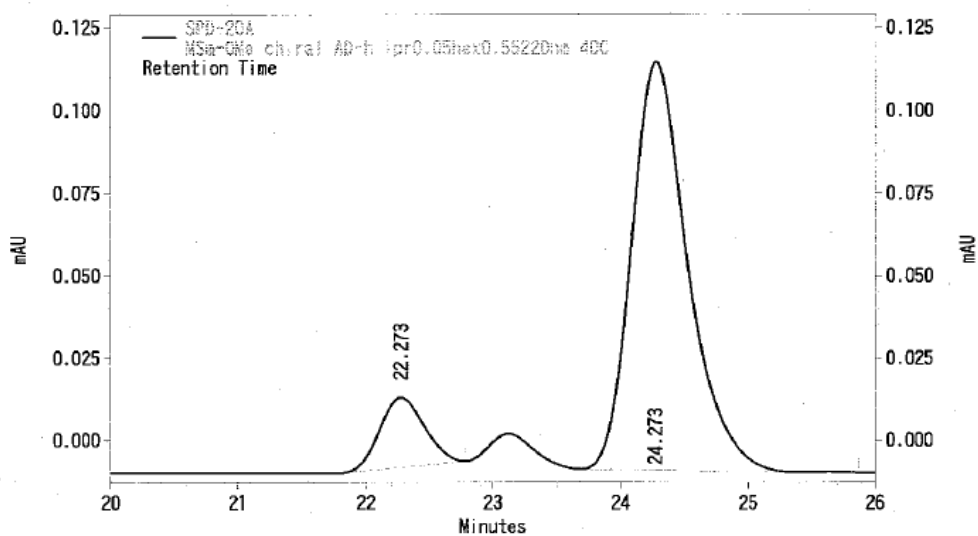

4

| Name   | Retention Time | Area    | Area Percent | Height |
|--------|----------------|---------|--------------|--------|
| 1      | 22.273         | 516421  | 12.027       | 21261  |
| 2      | 24.273         | 3777587 | 87.973       | 123736 |
| Totals |                | 4294008 | 100.000      | 144997 |

## Supporting Information II

(±)-2j

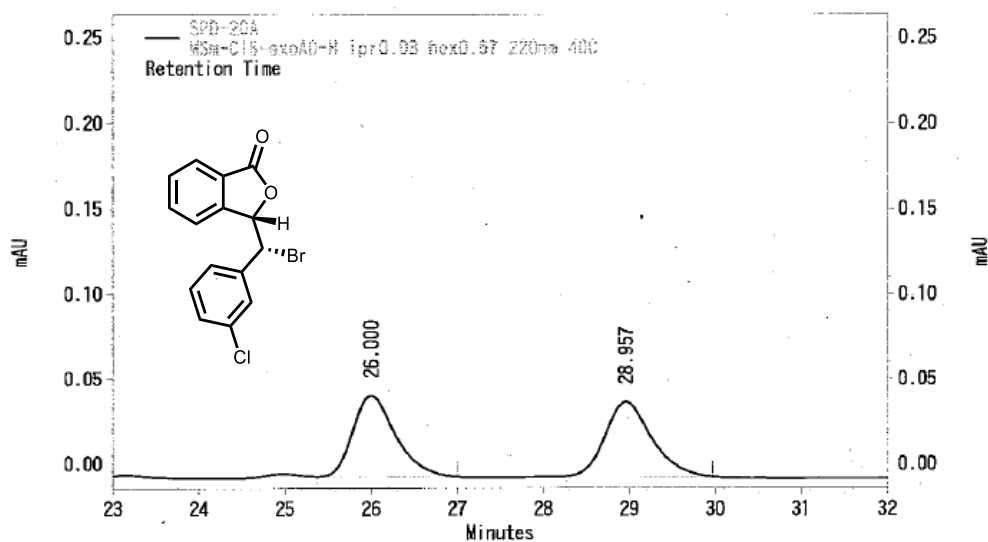

4

| Name          | Retention Time | Area           | Area Percent   | Height       |
|---------------|----------------|----------------|----------------|--------------|
| 1             | 26.000         | 1628617        | 49.631         | 47907        |
| 2             | 28.957         | 1652858        | 50.369         | 43871        |
| <b>Totals</b> |                | <b>3281475</b> | <b>100.000</b> | <b>91778</b> |

(3*R*,8*S*)-2j in Table 3, entry 9 (78:22 er)

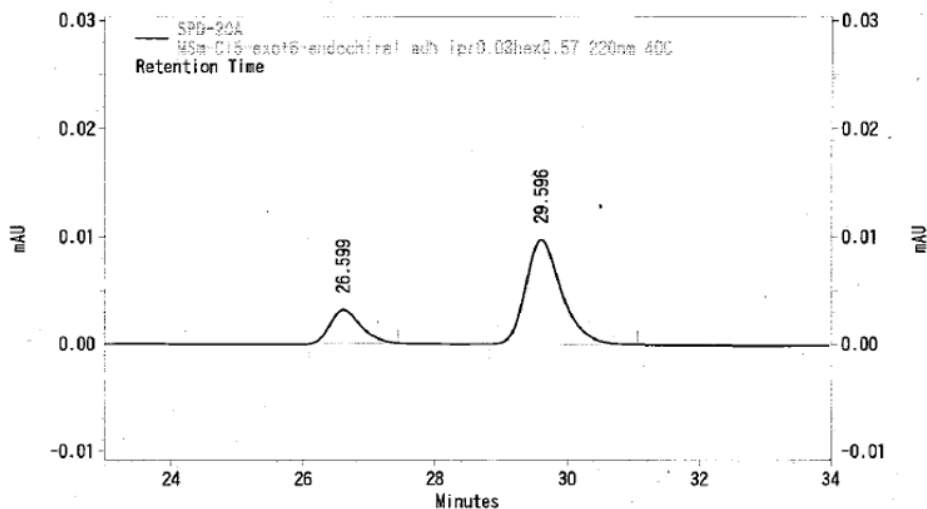

4

| Name          | Retention Time | Area          | Area Percent   | Height       |
|---------------|----------------|---------------|----------------|--------------|
| 1             | 26.599         | 102411        | 21.942         | 3148         |
| 2             | 29.596         | 364331        | 78.058         | 9703         |
| <b>Totals</b> |                | <b>466742</b> | <b>100.000</b> | <b>12851</b> |



## Supporting Information II

(±)-2k

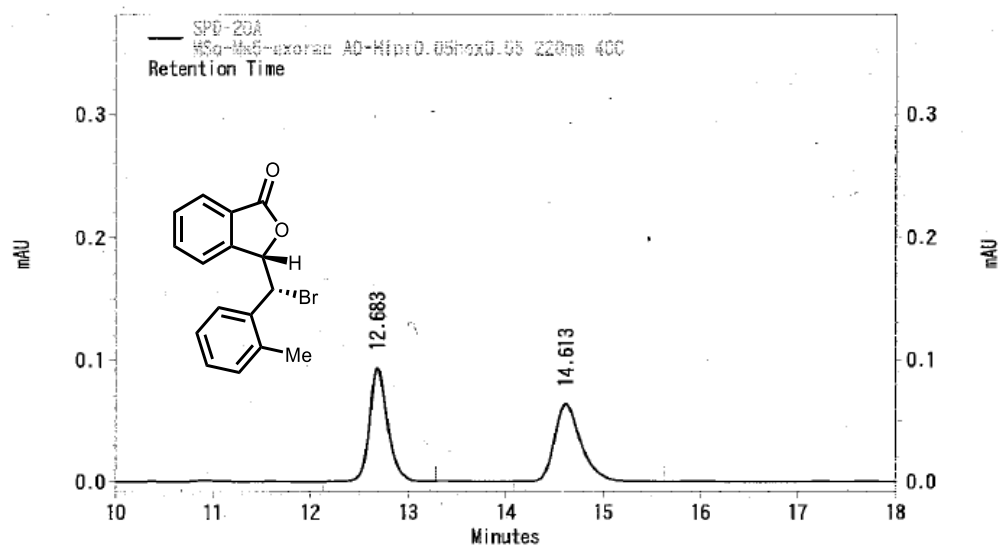

| Name          | Retention Time | Area           | Area Percent   | Height        |
|---------------|----------------|----------------|----------------|---------------|
| 1             | 12.683         | 1174011        | 49.403         | 93092         |
| 2             | 14.613         | 1202386        | 50.597         | 63417         |
| <b>Totals</b> |                | <b>2376397</b> | <b>100.000</b> | <b>156509</b> |

(3R,8S)-2k in Table 3, entry 10 (83:17 er)

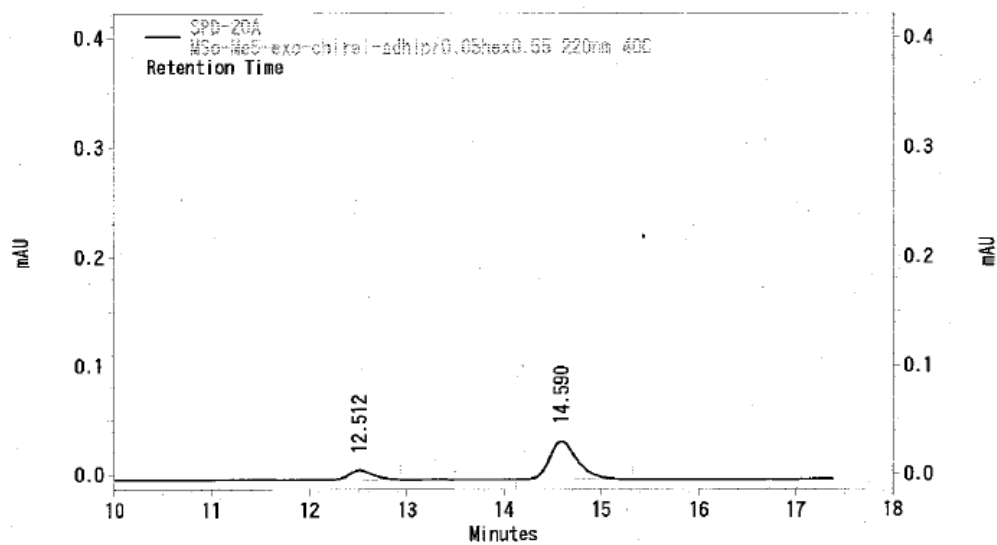

| Name          | Retention Time | Area          | Area Percent   | Height       |
|---------------|----------------|---------------|----------------|--------------|
| 1             | 12.512         | 141966        | 17.300         | 8388         |
| 2             | 14.590         | 678626        | 82.700         | 34852        |
| <b>Totals</b> |                | <b>820592</b> | <b>100.000</b> | <b>43240</b> |

## Supporting Information II

(±)-21

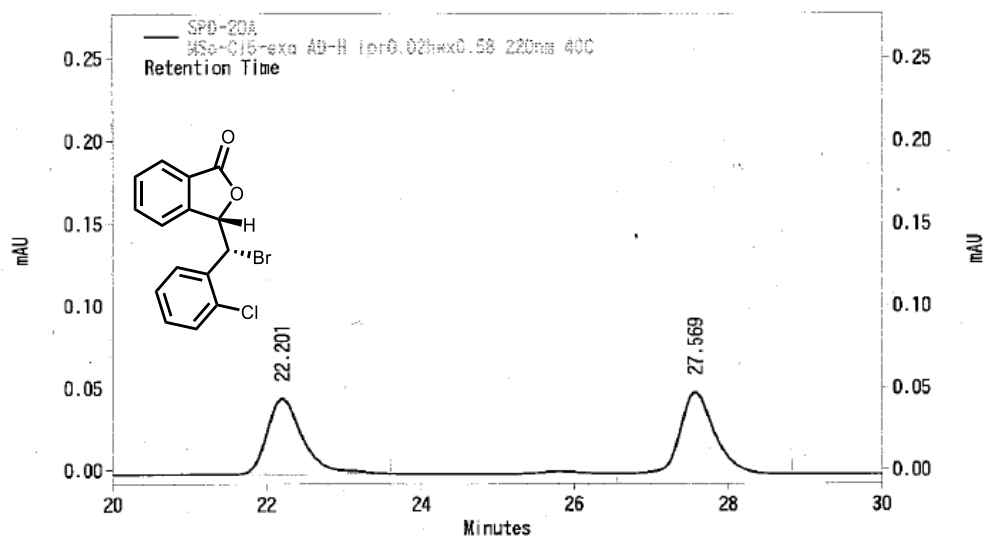

| Name   | Retention Time | Area    | Area Percent | Height |
|--------|----------------|---------|--------------|--------|
| 1      | 22.201         | 1487897 | 49.540       | 46204  |
| 2      | 27.569         | 1515517 | 50.460       | 49542  |
| Totals |                | 3003414 | 100.000      | 95746  |

(3R,8S)-21 in Table 3, entry 11 (80:20 er)

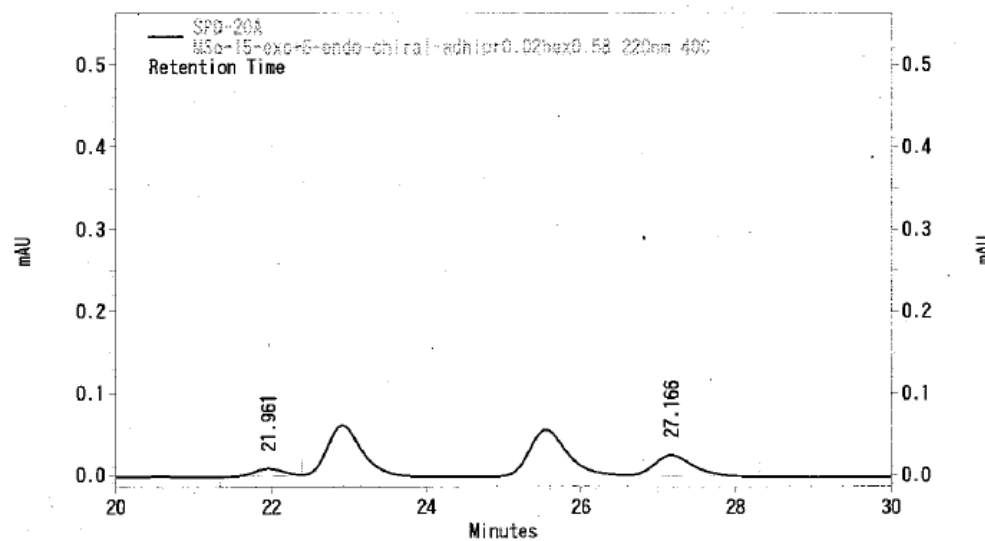

| Name   | Retention Time | Area    | Area Percent | Height |
|--------|----------------|---------|--------------|--------|
| 1      | 21.961         | 212105  | 19.985       | 8399   |
| 2      | 27.166         | 849207  | 80.015       | 24902  |
| Totals |                | 1061312 | 100.000      | 33301  |

## Supporting Information II

(±)-2m

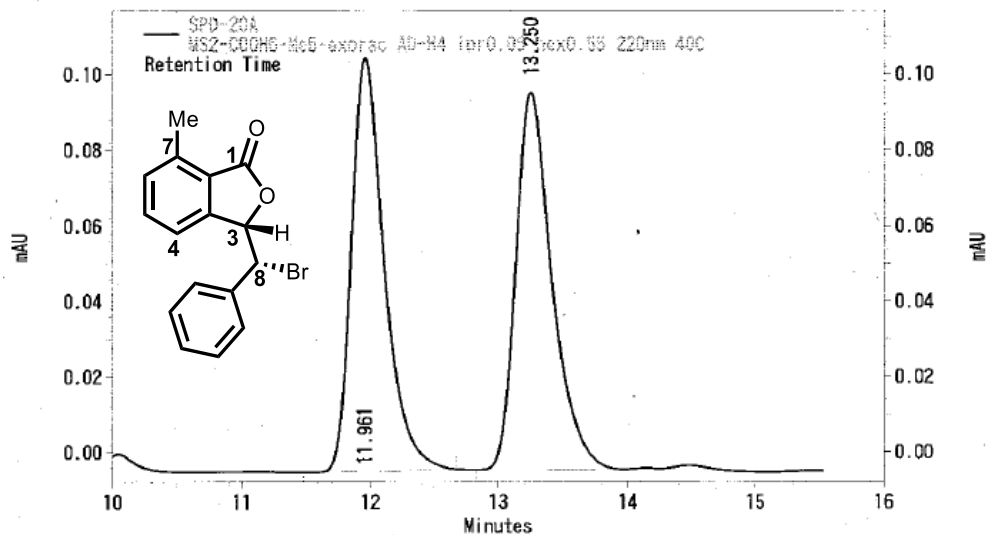

| Name          | Retention Time | Area           | Area Percent   | Height        |
|---------------|----------------|----------------|----------------|---------------|
| 1             | 11.961         | 1930358        | 49.920         | 109252        |
| 2             | 13.250         | 1936529        | 50.080         | 99796         |
| <b>Totals</b> |                | <b>3866887</b> | <b>100.000</b> | <b>209048</b> |

(3R,8S)-2m in Table 3, entry 12 (61:39 er)

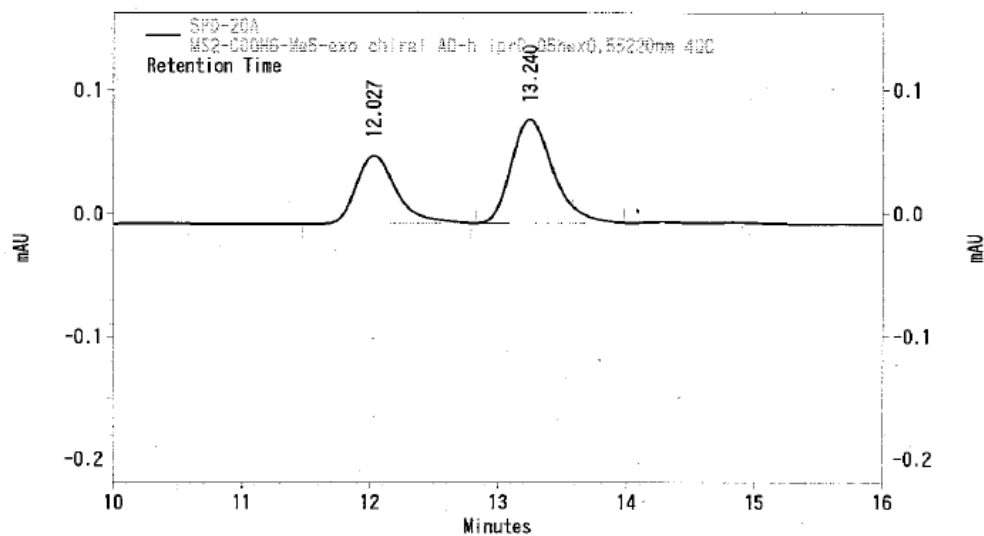

| Name          | Retention Time | Area           | Area Percent   | Height        |
|---------------|----------------|----------------|----------------|---------------|
| 1             | 12.027         | 1178737        | 38.445         | 55111         |
| 2             | 13.240         | 1880780        | 61.343         | 83441         |
| 3             | 49.289         | 6505           | 0.212          | 195           |
| <b>Totals</b> |                | <b>3066022</b> | <b>100.000</b> | <b>138747</b> |

(±)-2n

## Supporting Information II

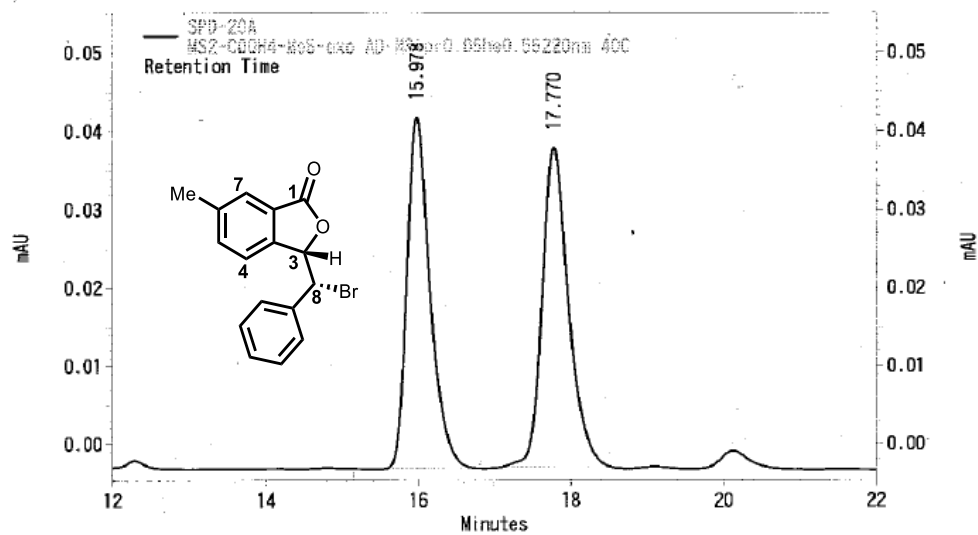

4

| Name   | Retention Time | Area    | Area Percent | Height |
|--------|----------------|---------|--------------|--------|
| 1      | 15.978         | 955418  | 49.410       | 44935  |
| 2      | 17.770         | 978219  | 50.590       | 40913  |
| Totals |                | 1933637 | 100.000      | 85848  |

(3*R*,8*S*)-**2n** in Table 3, entry 13 (92:8 er)

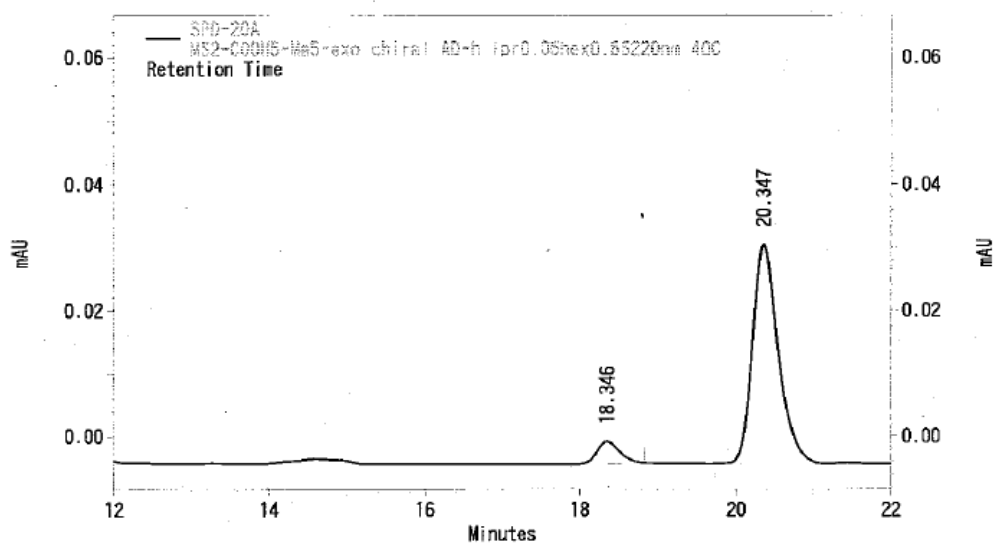

4

| Name   | Retention Time | Area   | Area Percent | Height |
|--------|----------------|--------|--------------|--------|
| 1      | 18.346         | 69302  | 7.899        | 3492   |
| 2      | 20.347         | 808069 | 92.101       | 34795  |
| Totals |                | 877371 | 100.000      | 38287  |

## Supporting Information II

(±)-2o

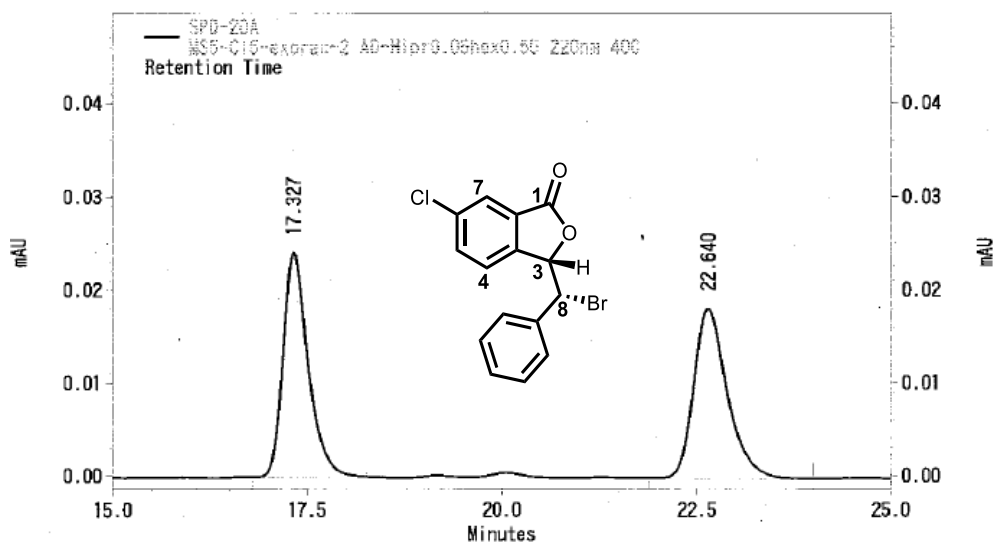

| Name   | Retention Time | Area    | Area Percent | Height |
|--------|----------------|---------|--------------|--------|
| 1      | 17.327         | 542388  | 49.959       | 24091  |
| 2      | 22.640         | 543281  | 50.041       | 18260  |
| Totals |                | 1085669 | 100.000      | 42351  |

(3R,8S)-2o in Table 3, entry 14 (80:20 er)

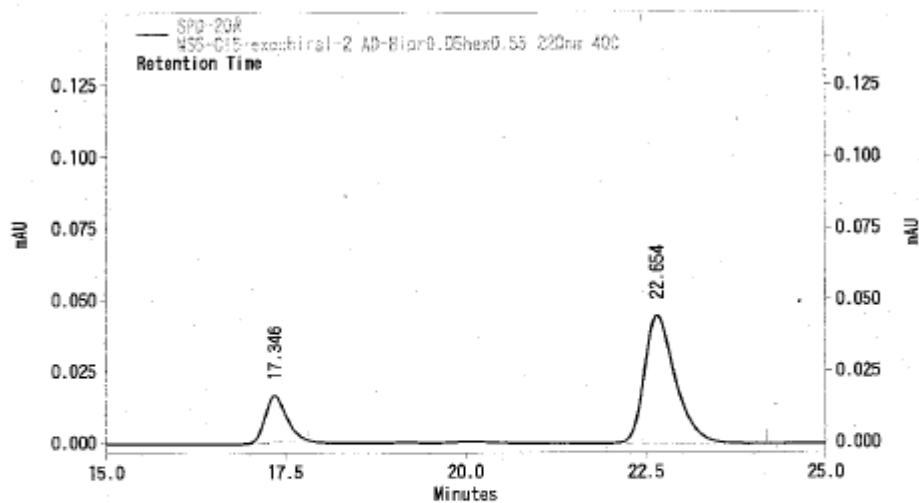

| Name   | Retention Time | Area    | Area Percent | Height |
|--------|----------------|---------|--------------|--------|
| 1      | 17.346         | 341775  | 20.387       | 16324  |
| 2      | 22.654         | 1334659 | 79.613       | 44828  |
| Totals |                | 1676434 | 100.000      | 61152  |

## Supporting Information II

(±)-2p

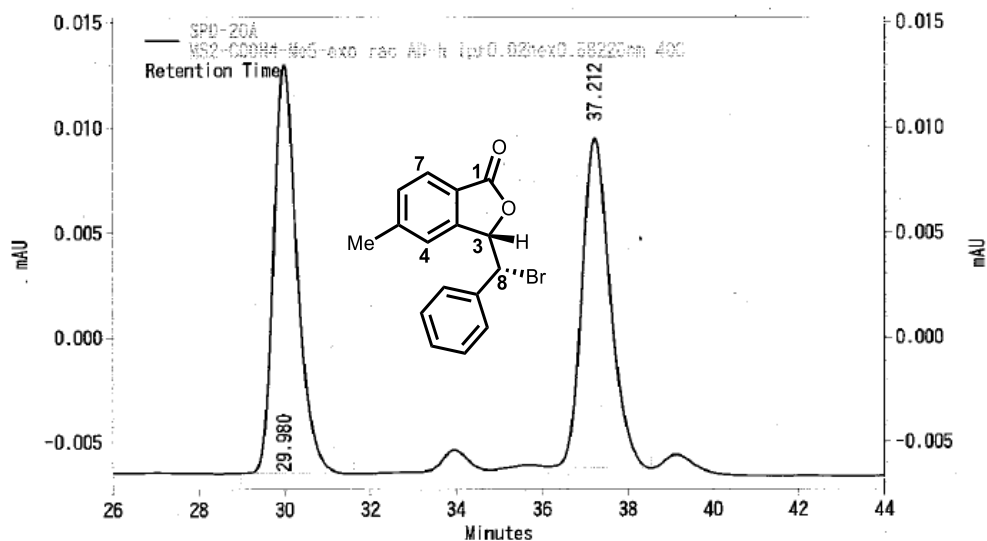

4

| Name   | Retention Time | Area    | Area Percent | Height |
|--------|----------------|---------|--------------|--------|
| 1      | 29.980         | 750806  | 51.057       | 19504  |
| 2      | 37.212         | 719726  | 48.943       | 15697  |
| Totals |                | 1470532 | 100.000      | 35201  |

(3R,8S)-2p in Table 3, entry 15 (86:14 er)

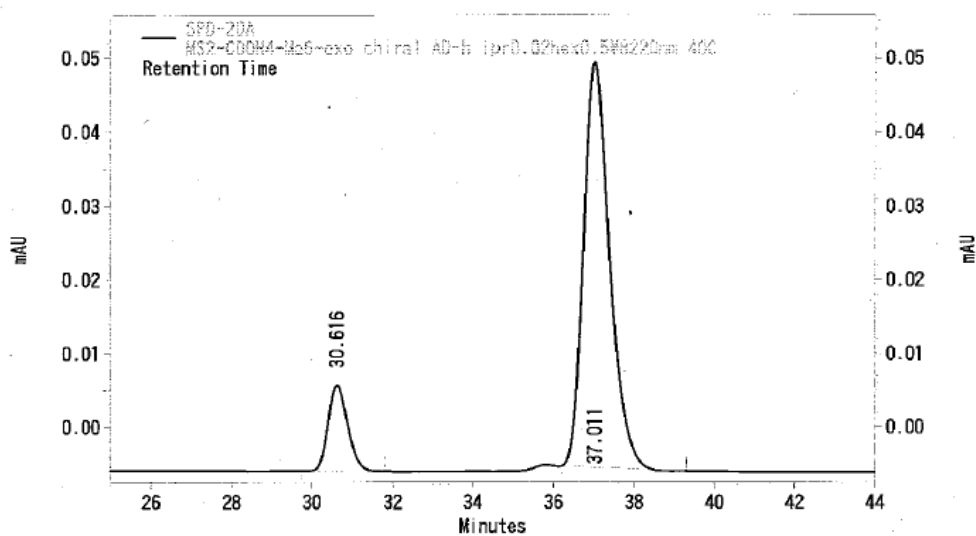

4

| Name   | Retention Time | Area    | Area Percent | Height |
|--------|----------------|---------|--------------|--------|
| 1      | 30.616         | 394293  | 13.832       | 11636  |
| 2      | 37.011         | 2456376 | 86.168       | 54888  |
| Totals |                | 2850669 | 100.000      | 66524  |
